# Supplementary material for: Characterization of hundreds of regulatory landscapes in developing limbs reveals two regimes of chromatin folding
Source: HighWire-hosted journal article supplement (doi:10.1101/gr.213066.116), 2016-12-06
Supplement: Supplemental_Legends_Refs.docx [file Supplemental_Legends_Refs.docx]

**Supplemental Information to:**

**Characterization of Hundreds of Regulatory Landscapes in Developing Limbs Reveals Two Regimes of Chromatin Folding**

Guillaume Andrey1♯, Robert Schöpflin2♯, Ivana Jerković1, Verena Heinrich2, Daniel M. Ibrahim1,4, Christina Paliou1, Myriam Hochradel3, Bernd Timmermann3, Stefan Haas2, Martin Vingron2 and Stefan Mundlos1,4,5

1RG Development & Disease, Max Planck Institute for Molecular Genetics, 14195 Berlin, Germany

2Department of Computational Molecular Biology, Max Planck Institute for Molecular Genetics, 14195 Berlin, Germany

3Max Planck Institute for Molecular Genetics, Sequencing Core Facility, 14195 Berlin, Germany;

4Institute for Medical and Human Genetics, Charité Universitätsmedizin Berlin, 13353 Berlin, Germany;

5Berlin-Brandenburg Center for Regenerative Therapies (BCRT), Charité Universitätsmedizin Berlin, 13353 Berlin, Germany

♯ These authors contributed equally to this work

**Legends to supplementary figures and tables:**

**Table S1:** Genomic coordinates (mm9) and names of captured viewpoints

**Table S2**: Chromatin states associated to every TSS in all tissues and time points.

**Table S3:** List of putative enhancer regions associated to their viewpoints in all tissues and time points.

**Table S4:** Complete list of aggregated putative enhancer regions.

**Table S5:** List of putative shared enhancers per tissues and time points. Every sheet of the table shows, for one tissue and time point, the genomic coordinates and size of the putative shared enhancers as well as the amount, names and coordinates of the viewpoints that interact with the putative enhancer. The last sheet shows the Pearson correlation between transcription of genes sharing putative enhancers, across tissues and time points.

**Table S6**: List of all probes used for the enrichment of the Capture-C libraries.

**Table S7**: Summary of the HiCUP pipeline (Wingett et al. 2015) processing for every Capture-C replicate.

**Table S8**: Viewpoints included in the Capture-C design and excluded from downstream analysis.

**Figure S1**: Distribution of correlation coefficients (Spearmann’s rho) between profiles of replicates of Capture-C viewpoints (VP) in pink and between profiles from different viewpoints in purple. Correlation coefficients were computed for all tissues and time points in a range ±500 kb around the viewpoint, excluding the viewpoint itself (±10kb).

**Figure S2**: Peak calling using the CHiCAGO package. **A.** Venn diagram showing the overlap between the CHiCAGO peak calls (Score ≥ 5) and the background model (99th percentile) in forelimb E10.5. Note, only peaks ±2Mb around the viewpoint were considered. For CHiCAGO adjacent fragments with a score ≥ 5 were merged. **B.** Number of peaks identified with the background model, which overlap with peaks identified using the CHiCAGO package (dark blue), as well as peaks from the background model without overlap (light blue).

**Figure S3:** Distribution of chromatin states ±2Mb around the CC viewpoints (promoter proximal) in the different stages and tissues.

**Figure S4**: Transcription measured by FPKM associated with the different chromatin states found at the TSS investigated in this study. Data was collected across tissues and time points.

**Figure S5**: Mappability of short reads grouped by chromatin states in HL E10.5. To probe mappability virtual sequence reads of 50 bp length were generated in 10 bp steps from the genomic sequence of mm9 and mapped to the same reference genome using bowtie 2.2.6 (Langmead and Salzberg 2012) (--end-to-end --sensitive). After filtering for reads with a MAPQ ≥ 10 the read density was computed per segment by dividing the number of overlapping read centers by the segment size.

**Figure S6**: Enrichment of the chromatin states at interaction peaks compared to their promoter proximal distribution in each tissues**.**

**Figure S7**: **A.** States of viewpoints’ TSS interacting with Active-A/B/C segments shown per sample. **B.** States of viewpoints’ TSS interacting with repressed and heterogeneous segments shown per sample.

**Figure S8: Enhancer prediction. A.** At the *Ptch1* locus three putative enhancers are predicted included the Limb cis-Regulatory Module (LRM) in forelimb at E10.5 (Lopez-Rios et al. 2014). A depiction of the *Ptch1* expression is painted in purple in the lower left corner of the scheme. **B.** At the *HoxD* locus in hindlimb at E10.5 the algorithm predicts for *Hoxd9*, *Hoxd10* and *Hoxd11* a series of shared putative early enhancers in the telomeric domain. The two previously characterized enhancers CS39 and CS65 are among them (Andrey et al. 2013). A depiction of the *Hoxd9*, *Hoxd10* and *Hoxd11* expression is painted in purple in the lower left corner of the scheme.

**Figure S9**: Overlap of predicted enhancers with the VISTA tested regions in forelimb and hindlimb at E11.5 and in midbrain at E10.5.

**Figure S10: Co-occurrence of CTCF and RAD21 binding**. Overlap of ChIP-seq peaks of CTCF and RAD21 for each tissue.

**Figure S11: Tissue and timepoint-specific association of stable and variable interaction peaks with CTCF/RAD21, as well as chromatin states.** (**A**) In midbrain, forelimb and hindlimb at E10.5, (**B**) in forelimb at all three stages and (**C**) in hindlimb at all three stages. Stable peaks are defined, as interactions above the 99th percentile in all tissues or time points examined. For variable peaks the interaction strength has to be above the 99th percentile for both replicates of one sample and to be below the 90th percentile in any two other replicates of the tissues or time points examined.

**References**

Andrey G, Montavon T, Mascrez B, Gonzalez F, Noordermeer D, Leleu M, Trono D, Spitz F, Duboule D. 2013. A switch between topological domains underlies HoxD genes collinearity in mouse limbs. *Science* **340**(6137): 1234167.

Langmead B, Salzberg SL. 2012. Fast gapped-read alignment with Bowtie 2. *Nature methods* **9**(4): 357-359.

Lopez-Rios J, Duchesne A, Speziale D, Andrey G, Peterson KA, Germann P, Unal E, Liu J, Floriot S, Barbey S et al. 2014. Attenuated sensing of SHH by Ptch1 underlies evolution of bovine limbs. *Nature* **511**(7507): 46-51.

Wingett S, Ewels P, Furlan-Magaril M, Nagano T, Schoenfelder S, Fraser P, Andrews S. 2015. HiCUP: pipeline for mapping and processing Hi-C data. *F1000Research* **4**: 1310.
