# Supplementary material for: Characterization of hundreds of regulatory landscapes in developing limbs reveals two regimes of chromatin folding
Source: HighWire-hosted journal article supplement (doi:10.1101/gr.213066.116), 2016-12-06
Supplement: Supplemental_Table_S1.xlsx [file Supplemental_Table_S1.xlsx]

## Sheet: TableS1.txt
Viewpoint Name	chrom	start	end
Sox17	chr1	4485407	4488172
Eya1	chr1	14297789	14300826
Tfap2d	chr1	19090986	19093353
Tfap2b	chr1	19197687	19200253
Col9a1	chr1	24200939	24204234
Rab23	chr1	33775794	33777495
Aff3	chr1	38682506	38686209
Pou3f3	chr1	42753399	42756355
Stat1	chr1	52174893	52177349
Nab1	chr1	52557508	52559900
Mstn	chr1	53117128	53119289
Satb2	chr1	57026627	57029730
Bmpr2	chr1	59819819	59822208
Myl1	chr1	66989705	66991844
Stk36	chr1	74647114	74648833
Wnt6	chr1	74816841	74819382
Wnt10a	chr1	74839748	74842043
Ihh	chr1	74995502	74997691
Des	chr1	75355432	75357954
Epha4	chr1	77510639	77513124
Pax3	chr1	78191709	78194212
Chrng	chr1	89101824	89104059
Per2	chr1	93354150	93356697
Twist2	chr1	93697637	93699620
Hdac4	chr1	94072214	94075604
Tnfrsf11a	chr1	107676462	107678830
Gli2	chr1	120948787	120951013
En1	chr1	122497168	122499210
Lypd1	chr1	127807483	127809680
Fmod	chr1	135933360	135936925
MyoG	chr1	136186190	136188541
Prg4	chr1	152313670	152315414
Dnm3os	chr1	164147278	164148832
Prrx1	chr1	165241834	165244894
Gorab	chr1	165332110	165335732
Lmx1a	chr1	169617781	169620605
Pbx1	chr1	170359699	170361825
Gm16586	chr1	180252359	180254574
Lefty2	chr1	182821900	182824343
Lefty1	chr1	182863507	182865888
Tgfb2	chr1	188527809	188530190
Irf6	chr1	194978901	194980831
Plagl1	chr10	12809571	12811281
Wisp3	chr10	38882360	38884604
Prdm1	chr10	44177241	44180107
Lin28b	chr10	45188881	45191794
Lin28b	chr10	45204558	45207471
Gja1	chr10	56096124	56099464
Sirt1	chr10	62800480	62802503
Egr2	chr10	66998706	67001124
2610008E11Rik	chr10	78559712	78561364
Tcf3	chr10	79894922	79897158
Aes	chr10	81022383	81023877
Ascl1	chr10	86954965	86957633
Igf1	chr10	87321504	87324810
Dcn	chr10	96940927	96943536
Alx1	chr10	102488033	102491530
Irak3	chr10	119638151	119640580
Hmga2	chr10	119910594	119913110
Wif1	chr10	120469988	120473103
Cyp27b1	chr10	126485191	126488182
Gli1	chr10	126776500	126779948
Nab2	chr10	127102912	127105995
Lif	chr11	4165360	4167897
Meis1	chr11	18917640	18921970
Rps27a	chr11	29447027	29448915
Hba-x	chr11	32175947	32178402
Fgf18	chr11	33044944	33049171
Ebf1	chr11	44429866	44432944
Sqstm1	chr11	50023598	50024962
Ppp2ca	chr11	51910567	51914502
Tcf7	chr11	52094713	52098256
Wnt3a	chr11	59103743	59106479
Wnt9a	chr11	59118966	59122269
Myh2	chr11	66983079	66985479
Myh1	chr11	67011957	67014889
Myh4	chr11	67050581	67053229
Myh8	chr11	67089893	67092508
Pfn1	chr11	70467133	70469959
Hic1	chr11	74982141	74984745
Bhlha9	chr11	76485118	76487158
Nlk	chr11	78508970	78512346
Tbx2	chr11	85644477	85646356
Tbx4	chr11	85702310	85705082
Nog	chr11	89161142	89163664
Col1a1	chr11	94796731	94799690
Dlx3	chr11	94981343	94983475
Hoxb13	chr11	96054140	96056361
Hoxb9	chr11	96131619	96133714
Hoxb1	chr11	96225871	96228956
Sp6	chr11	96878986	96880992
Med1	chr11	98053496	98054837
Rara	chr11	98798642	98800671
Rara	chr11	98821857	98823528
Stat3	chr11	100799145	100801066
Etv4	chr11	101645045	101647836
Meox1	chr11	101752673	101755867
Sost	chr11	101826683	101829817
Wnt9b	chr11	103610292	103612113
Wnt3	chr11	103634489	103636459
Myl4	chr11	104410121	104412681
Psmc5	chr11	106116504	106117972
Smurf2	chr11	106780307	106783821
Axin2	chr11	108782265	108784541
Sox9	chr11	112641359	112646504
Gdf7	chr12	8307831	8309670
Osr1	chr12	9580219	9583266
Mycn	chr12	12946427	12949861
Id2	chr12	25778545	25781441
Sox11	chr12	28025698	28028497
Twist1	chr12	34641628	34643879
Meox2	chr12	37833973	37836746
Arhgap5	chr12	53603896	53606591
Pax9	chr12	57795188	57798514
Six1	chr12	74144893	74148226
Six4	chr12	74212462	74215129
Hif1a	chr12	75007551	75011578
Esr2	chr12	77277147	77279323
Fos	chr12	86812679	86816216
Tgfb3	chr12	87417484	87420547
Gsc	chr12	105709730	105713337
Yy1	chr12	110030583	110033282
Rtl1	chr12	110837272	110841113
Actn2	chr13	12431079	12433330
Gli3	chr13	15553739	15557248
Inhba	chr13	16102561	16105504
E2f3	chr13	30075516	30078226
Bmp6	chr13	38436446	38439112
Tfap2a	chr13	40825005	40827900
Dek	chr13	47199953	47203176
Id4	chr13	48355943	48358276
Msx2	chr13	53566820	53569410
Pitx1	chr13	55931559	55934572
Tgfbi	chr13	56710029	56712867
Smad5	chr13	56803701	56807459
Ptch1	chr13	63665654	63670664
Mef2c	chr13	83662041	83665144
Vcan	chr13	89878065	89882877
Erbb2ip	chr13	104708533	104712643
Gpbp1	chr13	112278206	112281506
Itga1	chr13	115890083	115892736
Isl1	chr13	117098820	117101206
Fgf10	chr13	119457951	119459272
Fgf10	chr13	119501869	119505236
Wnt5a	chr14	29317453	29320874
Mustn1	chr14	31691416	31693844
Tnnc1	chr14	32020383	32023474
Ercc6	chr14	33324761	33328559
Bmpr1a	chr14	35314826	35317242
Bmp4	chr14	47008455	47011065
Chd8	chr14	52862331	52865565
Myh7	chr14	55612678	55614766
Nfatc4	chr14	56442510	56445943
Mphosph8	chr14	57285959	57288252
Zmym2	chr14	57503946	57507329
Fgf9	chr14	58689528	58694260
Ebf2	chr14	67851751	67855038
Nkx3-1	chr14	69808257	69810919
Fgf17	chr14	71040635	71042622
Fndc3a	chr14	73108094	73111002
Rb1	chr14	73724127	73727004
Tnfsf11	chr14	78705549	78708094
Akap11	chr14	78935084	78938166
Elf1	chr14	79880050	79882900
Spry2	chr14	106295079	106298486
Osr2	chr15	35224058	35226836
Klf10	chr15	38228931	38232336
Trps1	chr15	50719712	50722752
Tnfrsf11b	chr15	54108841	54111278
Myc	chr15	61816019	61819798
Wisp1	chr15	66721970	66723921
Scx	chr15	76286959	76290006
Atf4	chr15	80084611	80087550
Ep300	chr15	81414980	81418011
Wnt7b	chr15	85409954	85412945
Vdr	chr15	97737969	97740523
Col2a1	chr15	97832813	97835758
Wnt10b	chr15	98606409	98609148
Wnt1	chr15	98619059	98621568
Tuba1b	chr15	98763803	98766015
Acvr1b	chr15	101004077	101006768
Sp7	chr15	102195697	102197757
Sp1	chr15	102236459	102240226
Hoxc11	chr15	102784024	102787175
Hoxc10	chr15	102795404	102798730
Hoxc9	chr15	102805257	102807929
Hoxc4	chr15	102848536	102851167
Crebbp	chr16	4211629	4215253
Cebpd	chr16	15886577	15889028
Mapk1	chr16	16982837	16985470
Tbx1	chr16	18585392	18588330
B3gnt5	chr16	19759451	19762171
Dvl3	chr16	20516628	20519070
Chrd	chr16	20731852	20734764
Etv5	chr16	22437999	22441419
Trp63	chr16	25682462	25686020
Trp63	chr16	25800021	25803355
Fgf12	chr16	28443899	28448279
Fgf12	chr16	28563097	28567135
Fgf12	chr16	28751284	28754891
Gsk3b	chr16	38087970	38092456
C330027C09Rik	chr16	48991644	48994268
Ift57	chr16	49698437	49700858
T2	chr17	8564620	8566874
T	chr17	8625006	8627725
Igf2r	chr17	12958114	12962181
Ppp2r1a	chr17	21080536	21083642
Kremen2	chr17	23881797	23884110
Pkd1	chr17	24685553	24689486
Igfals	chr17	25014180	25016935
Clcn7	chr17	25269574	25272870
Ube2i	chr17	25409415	25412199
Sox8	chr17	25706361	25708800
Axin1	chr17	26273981	26276763
Ppard	chr17	28369475	28373816
Runx2	chr17	44870942	44874052
Runx2	chr17	44950490	44953890
Vegfa	chr17	46165116	46169966
Zeb1	chr18	5591240	5594740
Fzd8	chr18	9211622	9214739
Zfp521	chr18	14128669	14133943
Wnt8a	chr18	34700735	34703190
Egr1	chr18	35019556	35021798
Spry4	chr18	38759268	38762685
Cdo1	chr18	46886623	46889064
Synpo	chr18	60782378	60785115
Camk2a	chr18	61084281	61086705
Pmaip1	chr18	66617142	66619414
Tcf4	chr18	69502950	69505851
Tcf4	chr18	69751407	69754269
Smad4	chr18	73861064	73864330
Smad7	chr18	75525548	75529772
Smad2	chr18	76399843	76403469
Nfatc1	chr18	80907970	80911700
Lrp5	chr19	3684281	3686353
Fosl1	chr19	5447409	5449287
Rela	chr19	5636396	5639143
Men1	chr19	6334758	6337042
Smc5	chr19	23346653	23348500
Cyp26c1	chr19	37758209	37760884
Cyp26a1	chr19	37771291	37773877
Hells	chr19	39004451	39007635
Sfrp5	chr19	42275351	42278258
Wnt8b	chr19	44565623	44569278
Lbx1	chr19	45308187	45310704
Fgf8	chr19	45816056	45818653
Nfkb2	chr19	46378354	46380862
Sufu	chr19	46470246	46472935
Tcf7l2	chr19	55815031	55819344
Bmi1	chr2	18599399	18601713
Yme1l1	chr2	23010006	23012700
Rxra	chr2	27530691	27535014
Prrx2	chr2	30699700	30701855
Lmx1b	chr2	33493858	33498287
Rif1	chr2	51927686	51930368
Rprm	chr2	53936670	53939178
Ssb	chr2	69699429	69701481
Sp5	chr2	70311238	70314496
Dlx2	chr2	71383014	71385729
Zak	chr2	72122589	72125196
Sp3	chr2	72814956	72817313
Atf2	chr2	73728822	73731611
Evx2	chr2	74495971	74499159
Hoxd13	chr2	74503399	74506910
Hoxd12	chr2	74511740	74514909
Hoxd11	chr2	74517642	74520443
Hoxd10	chr2	74528796	74531118
Hoxd9	chr2	74535540	74538148
Lrp4	chr2	91296389	91299367
Alx4	chr2	93480400	93484710
Grem1	chr2	113596869	113600677
Actc1	chr2	113876646	113878928
Cops2	chr2	125682481	125687041
Bmp2	chr2	133377827	133381010
Esf1	chr2	139995542	139998524
Pax1	chr2	147189990	147192235
Id1	chr2	152561579	152563298
E2f1	chr2	154394484	154397002
Ncoa6	chr2	155297867	155299083
Gdf5	chr2	155769596	155771937
Rbl1	chr2	157028826	157031627
Wisp2	chr2	163645944	163648628
Matn4	chr2	164228390	164231595
Tnnc2	chr2	164603111	164605569
Nfatc2	chr2	168424925	168427771
Sall4	chr2	168590196	168593796
Tfap2c	chr2	172375912	172378889
Bmp7	chr2	172763233	172766213
E2f5	chr3	14578263	14581500
Tbl1xr1	chr3	21973234	21977082
Mecom	chr3	29908469	29911947
Smad9	chr3	54557451	54560918
Shox2	chr3	66784461	66787957
Crabp2	chr3	87751526	87754777
Tbx15	chr3	99058023	99061810
Wnt2b	chr3	104763632	104766963
Alx3	chr3	107396355	107399573
S1pr1	chr3	115416570	115419596
Pitx2	chr3	128900792	128903912
Lef1	chr3	130812216	130815371
Nfkb1	chr3	135351946	135355572
Bmpr1b	chr3	141592347	141595411
Bmpr1b	chr3	141831177	141834320
Gdf6	chr4	9769646	9772495
Pou3f2	chr4	22415669	22418516
Zfp292	chr4	34829007	34832392
Tpm2	chr4	43534335	43537745
Tmem38b	chr4	53837159	53839746
Klf4	chr4	55543909	55546908
Ikbkap	chr4	56813939	56817328
Tnc	chr4	63706260	63709304
Glis1	chr4	107105912	107109316
Ptch2	chr4	116768060	116771262
Ermap	chr4	118861479	118864330
Lepre1	chr4	118905023	118907974
Hivep3	chr4	119405844	119408039
Hivep3	chr4	119487113	119490170
Bmp8b	chr4	122781564	122784495
Bmp8a	chr4	123019023	123021504
Tfap2e	chr4	126410484	126413651
Lin28a	chr4	133573556	133576678
Runx3	chr4	134675185	134678341
Runx3	chr4	134706877	134709942
Id3	chr4	135698434	135701733
Wnt4	chr4	136832571	136834778
Alpl	chr4	137350911	137353799
Pax7	chr4	139387763	139390860
Ctnnbip1	chr4	148892947	148895607
Ski	chr4	154593802	154596613
Fzd1	chr5	4756129	4759451
Shh	chr5	28790366	28793783
Fosl2	chr5	32434356	32436464
Ctbp1	chr5	33614803	33618159
Fgfr3	chr5	34062714	34066174
Crmp1	chr5	37636006	37639808
Msx1	chr5	38213280	38216792
Nkx3-2	chr5	42154511	42157205
Zfp644	chr5	107123956	107126903
Tgfbr3	chr5	107716267	107719381
Fgfrl1	chr5	109122901	109126214
Hnf1a	chr5	115419129	115421530
Tbx3	chr5	120118007	120121035
Tbx5	chr5	120282740	120286014
Psmd9	chr5	123677462	123679523
Fzd9	chr5	135724445	135727028
Zfp68	chr5	139059130	139061688
Cdx2	chr5	148116421	148119811
Col1a2	chr6	4455175	4458605
Dlx6	chr6	6813961	6817080
Dlx5	chr6	6829460	6831986
Wnt2	chr6	17979408	17982502
Wnt16	chr6	22236638	22240442
Smo	chr6	29684804	29687499
Hoxa11	chr6	52195252	52198732
Hoxa13	chr6	52211035	52213106
Tax1bp1	chr6	52662811	52665204
Tcf7l1	chr6	72737065	72739646
Zfml	chr6	83864154	83865978
Cyp26b1	chr6	84534909	84538416
Ruvbl1	chr6	88414920	88416449
Wnt7a	chr6	91358852	91361807
Cxcl12	chr6	117117047	117119951
Wnt5b	chr6	119492709	119495777
Fgf23	chr6	127021763	127024047
Tulp3	chr6	128304538	128306471
Lrp6	chr6	134514703	134517662
Mgp	chr6	136821716	136825058
Sox5	chr6	144155558	144157976
Sox5	chr6	144729196	144732774
Pthlh	chr6	147209685	147213258
Tnnt1	chr7	4464872	4466692
Tgfb1	chr7	26471403	26474526
Zfp260	chr7	30879614	30880927
Cebpa	chr7	35902387	35905796
Myod1	chr7	53630740	53633917
Igf1r	chr7	75095274	75099424
Acan	chr7	86196114	86199786
Wnt11	chr7	105983038	105985614
Chrdl2	chr7	107152690	107155487
Lmo1	chr7	116312489	116314550
Pth	chr7	120529043	120531482
Sox6	chr7	123174364	123178112
Crym	chr7	127343082	127346365
Atp2a1	chr7	133604926	133608287
Tbx6	chr7	133923872	133926827
Mylpf	chr7	134353601	134355810
Fgfr2	chr7	137406004	137410493
Ctbp2	chr7	140205030	140208448
Ctbp2	chr7	140314221	140317388
Mki67	chr7	142906276	142909505
Ifitm5	chr7	148134123	148136461
Tnni2	chr7	149626419	149629008
Igf2	chr7	149844910	149848135
Fgf3	chr7	152023302	152025900
Fgf4	chr7	152046111	152048940
Ccnd1	chr7	152123023	152126810
Tfdp1	chr8	13337175	13340621
Ikbkb	chr8	23816260	23818378
Fgfr1	chr8	26628987	26631865
Zfp42	chr8	44391769	44393212
Hand2	chr8	59799231	59802712
Comp	chr8	72895934	72899081
Klf2	chr8	74841120	74844160
Smad1	chr8	81920191	81923739
Gypa	chr8	83016074	83018469
Nfix	chr8	87320883	87323459
Junb	chr8	87499950	87503039
Zfp423	chr8	90484546	90487815
Sall1	chr8	91564336	91569242
Rbl2	chr8	93593232	93595316
Cbfb	chr8	107693938	107696394
E2f4	chr8	107821041	107823098
Nfatc3	chr8	108581976	108584920
Nfat5	chr8	109816757	109819476
Acta1	chr8	126416842	126419934
Smarca4	chr9	21420114	21421636
Bmper	chr9	23025649	23028892
Zbtb16	chr9	48642043	48645207
Cryab	chr9	50560617	50562977
Crabp1	chr9	54611791	54613863
Islr	chr9	58005708	58008732
Smad3	chr9	63604233	63607322
Smad6	chr9	63867549	63870701
Igdcc3	chr9	64988092	64990778
Tpm1	chr9	66894122	66897762
Aldh1a2	chr9	71062568	71065630
Bmp5	chr9	75622085	75625629
Phip	chr9	82866552	82871317
Prss35	chr9	86635700	86638434
Tbx18	chr9	87624412	87627364
Rhoa	chr9	108207401	108210367
Pth1r	chr9	110643727	110647200
Ctnnb1	chr9	120841457	120844370
Zfp445	chr9	122766043	122767650
Usp9x	chrX	12647482	12651148
Thoc2	chrX	39262680	39265678
Zic3	chrX	55283652	55286414
Bgn	chrX	70728179	70731425
Flna	chrX	71489949	71492440
Pls3	chrX	73118953	73121477
Tbl1x	chrX	74754444	74758123
Eda	chrX	97169963	97172497
Cdx4	chrX	100516297	100518806
Mum1l1	chrX	135751305	135753008
Chrdl1	chrX	139827234	139830446
Phex	chrX	153850996	153853960
