# Supplementary material for: Characterization of hundreds of regulatory landscapes in developing limbs reveals two regimes of chromatin folding
Source: HighWire-hosted journal article supplement (doi:10.1101/gr.213066.116), 2016-12-06
Supplement: Supplemental_Table_S3.xlsx [file Supplemental_Table_S3.xlsx]

## Sheet: FL_E10.5
viewpoint	chrom	start	end	width
chr6_52211035_52213106_Hoxa13	chr6	51116070	51137069	21000
chr6_52195252_52198732_Hoxa11	chr6	51116992	51136991	20000
chr3_29908469_29911947_Mecom	chr3	30402208	30417207	15000
chr2_18599399_18601713_Bmi1	chr2	17965556	17978555	13000
chr5_120282740_120286014_Tbx5	chr5	120245377	120257376	12000
chr15_102784024_102787175_Hoxc11	chr15	102832600	102842599	10000
chr1_164147278_164148832_Dnm3os	chr1	163928055	163937054	9000
chr1_164147278_164148832_Dnm3os	chr1	163947055	163956054	9000
chr6_84534909_84538416_Cyp26b1	chr6	84050662	84058661	8000
chr3_29908469_29911947_Mecom	chr3	30313208	30321207	8000
chr7_30879614_30880927_Zfp260	chr7	29154270	29162269	8000
chr9_64988092_64990778_Igdcc3	chr9	65008435	65015434	7000
chr15_50719712_50722752_Trps1	chr15	51623232	51630231	7000
chr6_6813961_6817080_Dlx6	chr6	5775520	5781519	6000
chr6_52195252_52198732_Hoxa11	chr6	51143992	51149991	6000
chr3_29908469_29911947_Mecom	chr3	30114208	30120207	6000
chr6_72737065_72739646_Tcf7l1	chr6	72625356	72631355	6000
chr8_44391769_44393212_Zfp42	chr8	42631490	42637489	6000
chr7_152123023_152126810_Ccnd1	chr7	152390916	152395915	5000
chr6_4455175_4458605_Col1a2	chr6	5058890	5063889	5000
chr6_4455175_4458605_Col1a2	chr6	5330890	5335889	5000
chr7_140205030_140208448_Ctbp2	chr7	140825739	140830738	5000
chr9_120841457_120844370_Ctnnb1	chr9	120509914	120514913	5000
chr13_30075516_30078226_E2f3	chr13	28498871	28503870	5000
chr18_35019556_35021798_Egr1	chr18	35720677	35725676	5000
chr1_77510639_77513124_Epha4	chr1	75780882	75785881	5000
chr1_77510639_77513124_Epha4	chr1	75827882	75832881	5000
chr2_74495971_74499159_Evx2	chr2	73788565	73793564	5000
chr15_102795404_102798730_Hoxc10	chr15	102839067	102844066	5000
chr15_102805257_102807929_Hoxc9	chr15	102836593	102841592	5000
chr12_25778545_25781441_Id2	chr12	26215993	26220992	5000
chr7_75095274_75099424_Igf1r	chr7	75272349	75277348	5000
chr12_12946427_12949861_Mycn	chr12	12586144	12591143	5000
chr14_56442510_56445943_Nfatc4	chr14	56469226	56474225	5000
chr2_30699700_30701855_Prrx2	chr2	30294778	30299777	5000
chr9_63867549_63870701_Smad6	chr9	63805125	63810124	5000
chr12_28025698_28028497_Sox11	chr12	27216098	27221097	5000
chr7_123174364_123178112_Sox6	chr7	122787238	122792237	5000
chr3_21973234_21977082_Tbl1xr1	chr3	21832158	21837157	5000
chr10_79894922_79897158_Tcf3	chr10	79859040	79864039	5000
chr10_120469988_120473103_Wif1	chr10	119686546	119691545	5000
chr11_94796731_94799690_Col1a1	chr11	94740210	94744209	4000
chr8_72895934_72899081_Comp	chr8	73061508	73065507	4000
chr3_87751526_87754777_Crabp2	chr3	87762152	87766151	4000
chr7_140314221_140317388_Ctbp2	chr7	140825804	140829803	4000
chr9_120841457_120844370_Ctnnb1	chr9	120597914	120601913	4000
chr6_117117047_117119951_Cxcl12	chr6	117856499	117860498	4000
chr19_37758209_37760884_Cyp26c1	chr19	37980546	37984545	4000
chr16_20516628_20519070_Dvl3	chr16	20608849	20612848	4000
chr11_44429866_44432944_Ebf1	chr11	45362405	45366404	4000
chr1_77510639_77513124_Epha4	chr1	75766882	75770881	4000
chr1_77510639_77513124_Epha4	chr1	75977882	75981881	4000
chr12_86812679_86816216_Fos	chr12	86712448	86716447	4000
chr10_56096124_56099464_Gja1	chr10	56557794	56561793	4000
chr13_15553739_15557248_Gli3	chr13	15641494	15645493	4000
chr8_59799231_59802712_Hand2	chr8	59806972	59810971	4000
chr10_119910594_119913110_Hmga2	chr10	120308852	120312851	4000
chr6_52211035_52213106_Hoxa13	chr6	51144070	51148069	4000
chr15_102795404_102798730_Hoxc10	chr15	103135067	103139066	4000
chr2_74528796_74531118_Hoxd10	chr2	75904957	75908956	4000
chr2_74511740_74514909_Hoxd12	chr2	73789324	73793323	4000
chr2_74503399_74506910_Hoxd13	chr2	73789154	73793153	4000
chr4_135698434_135701733_Id3	chr4	135606084	135610083	4000
chr9_64988092_64990778_Igdcc3	chr9	65037435	65041434	4000
chr9_64988092_64990778_Igdcc3	chr9	65042435	65046434	4000
chr7_149844910_149848135_Igf2	chr7	149727522	149731521	4000
chr10_119638151_119640580_Irak3	chr10	120307366	120311365	4000
chr3_29908469_29911947_Mecom	chr3	30125208	30129207	4000
chr11_18917640_18921970_Meis1	chr11	18782805	18786804	4000
chr15_61816019_61819798_Myc	chr15	63021908	63025907	4000
chr12_9580219_9583266_Osr1	chr12	10577742	10581741	4000
chr13_63665654_63670664_Ptch1	chr13	64051159	64055158	4000
chr3_66784461_66787957_Shox2	chr3	66212209	66216208	4000
chr12_74144893_74148226_Six1	chr12	74620560	74624559	4000
chr12_74212462_74215129_Six4	chr12	74620796	74624795	4000
chr9_21420114_21421636_Smarca4	chr9	21599875	21603874	4000
chr19_23346653_23348500_Smc5	chr19	21851576	21855575	4000
chr12_28025698_28028497_Sox11	chr12	28249098	28253097	4000
chr3_21973234_21977082_Tbl1xr1	chr3	21461158	21465157	4000
chr3_99058023_99061810_Tbx15	chr3	99042916	99046915	4000
chr19_55815031_55819344_Tcf7l2	chr19	55599188	55603187	4000
chr17_46165116_46169966_Vegfa	chr17	45871541	45875540	4000
chr10_120469988_120473103_Wif1	chr10	119681546	119685545	4000
chr14_29317453_29320874_Wnt5a	chr14	29925164	29929163	4000
chr12_110030583_110033282_Yy1	chr12	111932932	111936931	4000
chr10_81022383_81023877_Aes	chr10	82152130	82155129	3000
chr6_4455175_4458605_Col1a2	chr6	5337890	5340889	3000
chr15_97832813_97835758_Col2a1	chr15	96528286	96531285	3000
chr13_30075516_30078226_E2f3	chr13	28633871	28636870	3000
chr18_35019556_35021798_Egr1	chr18	35757677	35760676	3000
chr10_56096124_56099464_Gja1	chr10	56639794	56642793	3000
chr13_15553739_15557248_Gli3	chr13	15633494	15636493	3000
chr1_180252359_180254574_Gm16586	chr1	181387466	181390465	3000
chr10_119910594_119913110_Hmga2	chr10	120157852	120160851	3000
chr10_119910594_119913110_Hmga2	chr10	120181852	120184851	3000
chr10_119910594_119913110_Hmga2	chr10	120291852	120294851	3000
chr15_102795404_102798730_Hoxc10	chr15	102575067	102578066	3000
chr2_74528796_74531118_Hoxd10	chr2	74985957	74988956	3000
chr2_74528796_74531118_Hoxd10	chr2	75422957	75425956	3000
chr2_74517642_74520443_Hoxd11	chr2	73789042	73792041	3000
chr2_74535540_74538148_Hoxd9	chr2	74985844	74988843	3000
chr12_25778545_25781441_Id2	chr12	27078993	27081992	3000
chr9_64988092_64990778_Igdcc3	chr9	65002435	65005434	3000
chr8_87499950_87503039_Junb	chr8	87549494	87552493	3000
chr8_87499950_87503039_Junb	chr8	87559494	87562493	3000
chr4_118905023_118907974_Lepre1	chr4	120488498	120491497	3000
chr2_33493858_33498287_Lmx1b	chr2	33488072	33491071	3000
chr1_66989705_66991844_Myl1	chr1	65223774	65226773	3000
chr7_134353601_134355810_Mylpf	chr7	134373706	134376705	3000
chr8_109816757_109819476_Nfat5	chr8	111235116	111238115	3000
chr8_87320883_87323459_Nfix	chr8	87235171	87238170	3000
chr11_70467133_70469959_Pfn1	chr11	69732546	69735545	3000
chr11_98821857_98823528_Rara	chr11	98786692	98789691	3000
chr14_106295079_106298486_Spry2	chr14	106129782	106132781	3000
chr6_52662811_52665204_Tax1bp1	chr6	51120008	51123007	3000
chr9_87624412_87627364_Tbx18	chr9	87963888	87966887	3000
chr5_120118007_120121035_Tbx3	chr5	119393521	119396520	3000
chr18_69502950_69505851_Tcf4	chr18	68869400	68872399	3000
chr2_172375912_172378889_Tfap2c	chr2	172759400	172762399	3000
chr7_149626419_149629008_Tnni2	chr7	149665714	149668713	3000
chr7_149626419_149629008_Tnni2	chr7	149722714	149725713	3000
chr7_149626419_149629008_Tnni2	chr7	149741714	149744713	3000
chr7_149626419_149629008_Tnni2	chr7	149762714	149765713	3000
chr15_50719712_50722752_Trps1	chr15	51631232	51634231	3000
chr13_89878065_89882877_Vcan	chr13	90899471	90902470	3000
chr12_110030583_110033282_Yy1	chr12	111827932	111830931	3000
chr8_90484546_90487815_Zfp423	chr8	90345180	90348179	3000
chr18_14128669_14133943_Zfp521	chr18	13297306	13300305	3000
chr2_18599399_18601713_Bmi1	chr2	17949556	17951555	2000
chr18_46886623_46889064_Cdo1	chr18	46755844	46757843	2000
chr16_15886577_15889028_Cebpd	chr16	16301802	16303801	2000
chr15_97832813_97835758_Col2a1	chr15	96538286	96540285	2000
chr6_117117047_117119951_Cxcl12	chr6	117868499	117870498	2000
chr10_126485191_126488182_Cyp27b1	chr10	125248686	125250685	2000
chr6_6829460_6831986_Dlx5	chr6	5776723	5778722	2000
chr1_164147278_164148832_Dnm3os	chr1	163938055	163940054	2000
chr16_20516628_20519070_Dvl3	chr16	21203849	21205848	2000
chr13_30075516_30078226_E2f3	chr13	28507871	28509870	2000
chr14_67851751_67855038_Ebf2	chr14	68332394	68334393	2000
chr18_35019556_35021798_Egr1	chr18	36033677	36035676	2000
chr18_35019556_35021798_Egr1	chr18	36076677	36078676	2000
chr18_35019556_35021798_Egr1	chr18	36079677	36081676	2000
chr15_81414980_81418011_Ep300	chr15	81296496	81298495	2000
chr2_74495971_74499159_Evx2	chr2	73747565	73749564	2000
chr13_119457951_119459272_Fgf10	chr13	120278612	120280611	2000
chr14_58689528_58694260_Fgf9	chr14	59819894	59821893	2000
chr5_34062714_34066174_Fgfr3	chr5	35291444	35293443	2000
chr2_155769596_155771937_Gdf5	chr2	157379766	157381765	2000
chr10_56096124_56099464_Gja1	chr10	56698794	56700793	2000
chr8_59799231_59802712_Hand2	chr8	59813972	59815971	2000
chr10_119910594_119913110_Hmga2	chr10	119989852	119991851	2000
chr10_119910594_119913110_Hmga2	chr10	120145852	120147851	2000
chr6_52195252_52198732_Hoxa11	chr6	50942992	50944991	2000
chr6_52211035_52213106_Hoxa13	chr6	52919070	52921069	2000
chr15_102784024_102787175_Hoxc11	chr15	102828600	102830599	2000
chr15_102848536_102851167_Hoxc4	chr15	102887852	102889851	2000
chr15_102805257_102807929_Hoxc9	chr15	102576593	102578592	2000
chr15_102805257_102807929_Hoxc9	chr15	102833593	102835592	2000
chr15_102805257_102807929_Hoxc9	chr15	102887593	102889592	2000
chr2_74528796_74531118_Hoxd10	chr2	75796957	75798956	2000
chr2_74517642_74520443_Hoxd11	chr2	73410042	73412041	2000
chr2_74517642_74520443_Hoxd11	chr2	75191042	75193041	2000
chr2_74511740_74514909_Hoxd12	chr2	73410324	73412323	2000
chr2_74511740_74514909_Hoxd12	chr2	73747324	73749323	2000
chr2_74511740_74514909_Hoxd12	chr2	73816324	73818323	2000
chr2_74503399_74506910_Hoxd13	chr2	73410154	73412153	2000
chr2_74503399_74506910_Hoxd13	chr2	73747154	73749153	2000
chr2_74535540_74538148_Hoxd9	chr2	73788844	73790843	2000
chr2_74535540_74538148_Hoxd9	chr2	75423844	75425843	2000
chr2_152561579_152563298_Id1	chr2	152655438	152657437	2000
chr9_64988092_64990778_Igdcc3	chr9	65024435	65026434	2000
chr3_130812216_130815371_Lef1	chr3	130431794	130433793	2000
chr11_98053496_98054837_Med1	chr11	97561166	97563165	2000
chr12_37833973_37836746_Meox2	chr12	37445360	37447359	2000
chr8_109816757_109819476_Nfat5	chr8	108381116	108383115	2000
chr3_135351946_135355572_Nfkb1	chr3	133897759	133899758	2000
chr11_70467133_70469959_Pfn1	chr11	70480546	70482545	2000
chr1_165241834_165244894_Prrx1	chr1	165827364	165829363	2000
chr11_98821857_98823528_Rara	chr11	98995692	98997691	2000
chr3_66784461_66787957_Shox2	chr3	65778209	65780208	2000
chr9_21420114_21421636_Smarca4	chr9	21349875	21351874	2000
chr12_28025698_28028497_Sox11	chr12	28154098	28156097	2000
chr11_112641359_112646504_Sox9	chr11	110819932	110821931	2000
chr11_112641359_112646504_Sox9	chr11	111590932	111592931	2000
chr17_8564620_8566874_T2	chr17	10525747	10527746	2000
chr7_133923872_133926827_Tbx6	chr7	134375350	134377349	2000
chr6_72737065_72739646_Tcf7l1	chr6	72602356	72604355	2000
chr7_149626419_149629008_Tnni2	chr7	149754714	149756713	2000
chr7_4464872_4466692_Tnnt1	chr7	3597782	3599781	2000
chr15_98763803_98766015_Tuba1b	chr15	98699909	98701908	2000
chr12_34641628_34643879_Twist1	chr12	35320754	35322753	2000
chr11_59118966_59122269_Wnt9a	chr11	60351618	60353617	2000
chr8_44391769_44393212_Zfp42	chr8	42676490	42678489	2000
chr18_14128669_14133943_Zfp521	chr18	13760306	13762305	2000
chr18_14128669_14133943_Zfp521	chr18	14662306	14664305	2000
chr15_101004077_101006768_Acvr1b	chr15	100059422	100060421	1000
chr10_81022383_81023877_Aes	chr10	79313130	79314129	1000
chr10_81022383_81023877_Aes	chr10	81067130	81068129	1000
chr1_38682506_38686209_Aff3	chr1	36917358	36918357	1000
chr1_38682506_38686209_Aff3	chr1	38453358	38454357	1000
chr1_38682506_38686209_Aff3	chr1	38822358	38823357	1000
chr12_53603896_53606591_Arhgap5	chr12	53978244	53979243	1000
chr2_73728822_73731611_Atf2	chr2	74525216	74526215	1000
chr15_80084611_80087550_Atf4	chr15	80629080	80630079	1000
chr2_18599399_18601713_Bmi1	chr2	17959556	17960555	1000
chr13_47199953_47203176_Dek	chr13	48639564	48640563	1000
chr6_6829460_6831986_Dlx5	chr6	6064723	6065722	1000
chr6_6813961_6817080_Dlx6	chr6	5756520	5757519	1000
chr6_6813961_6817080_Dlx6	chr6	6064520	6065519	1000
chr1_164147278_164148832_Dnm3os	chr1	163921055	163922054	1000
chr1_164147278_164148832_Dnm3os	chr1	163966055	163967054	1000
chr2_154394484_154397002_E2f1	chr2	152673743	152674742	1000
chr13_30075516_30078226_E2f3	chr13	28637871	28638870	1000
chr11_44429866_44432944_Ebf1	chr11	46027405	46028404	1000
chr11_44429866_44432944_Ebf1	chr11	46029405	46030404	1000
chr14_67851751_67855038_Ebf2	chr14	68330394	68331393	1000
chr18_35019556_35021798_Egr1	chr18	35900677	35901676	1000
chr18_35019556_35021798_Egr1	chr18	35931677	35932676	1000
chr1_77510639_77513124_Epha4	chr1	75577882	75578881	1000
chr2_74495971_74499159_Evx2	chr2	73410565	73411564	1000
chr2_74495971_74499159_Evx2	chr2	73816565	73817564	1000
chr1_14297789_14300826_Eya1	chr1	13849308	13850307	1000
chr1_14297789_14300826_Eya1	chr1	13852308	13853307	1000
chr13_119501869_119505236_Fgf10	chr13	120279552	120280551	1000
chr16_28443899_28448279_Fgf12	chr16	27390089	27391088	1000
chr14_58689528_58694260_Fgf9	chr14	59822894	59823893	1000
chr8_26628987_26631865_Fgfr1	chr8	26462426	26463425	1000
chr8_26628987_26631865_Fgfr1	chr8	26479426	26480425	1000
chr1_135933360_135936925_Fmod	chr1	135555142	135556141	1000
chr12_86812679_86816216_Fos	chr12	88233448	88234447	1000
chr19_5447409_5449287_Fosl1	chr19	5486348	5487347	1000
chr18_9211622_9214739_Fzd8	chr18	8328180	8329179	1000
chr10_56096124_56099464_Gja1	chr10	56637794	56638793	1000
chr1_120948787_120951013_Gli2	chr1	120798900	120799899	1000
chr1_120948787_120951013_Gli2	chr1	120803900	120804899	1000
chr1_180252359_180254574_Gm16586	chr1	180264466	180265465	1000
chr1_180252359_180254574_Gm16586	chr1	182216466	182217465	1000
chr12_105709730_105713337_Gsc	chr12	105872534	105873533	1000
chr12_105709730_105713337_Gsc	chr12	105988534	105989533	1000
chr8_59799231_59802712_Hand2	chr8	59820972	59821971	1000
chr12_75007551_75011578_Hif1a	chr12	73860564	73861563	1000
chr10_119910594_119913110_Hmga2	chr10	120155852	120156851	1000
chr10_119910594_119913110_Hmga2	chr10	120178852	120179851	1000
chr10_119910594_119913110_Hmga2	chr10	120301852	120302851	1000
chr10_119910594_119913110_Hmga2	chr10	120303852	120304851	1000
chr10_119910594_119913110_Hmga2	chr10	120306852	120307851	1000
chr6_52211035_52213106_Hoxa13	chr6	52115070	52116069	1000
chr6_52211035_52213106_Hoxa13	chr6	52917070	52918069	1000
chr15_102795404_102798730_Hoxc10	chr15	102829067	102830066	1000
chr15_102795404_102798730_Hoxc10	chr15	102858067	102859066	1000
chr15_102795404_102798730_Hoxc10	chr15	103124067	103125066	1000
chr15_102784024_102787175_Hoxc11	chr15	102577600	102578599	1000
chr15_102784024_102787175_Hoxc11	chr15	102858600	102859599	1000
chr15_102784024_102787175_Hoxc11	chr15	102866600	102867599	1000
chr15_102848536_102851167_Hoxc4	chr15	102858852	102859851	1000
chr15_102848536_102851167_Hoxc4	chr15	102866852	102867851	1000
chr15_102805257_102807929_Hoxc9	chr15	102828593	102829592	1000
chr15_102805257_102807929_Hoxc9	chr15	102866593	102867592	1000
chr2_74517642_74520443_Hoxd11	chr2	74525042	74526041	1000
chr2_74517642_74520443_Hoxd11	chr2	74986042	74987041	1000
chr2_74517642_74520443_Hoxd11	chr2	75352042	75353041	1000
chr2_74511740_74514909_Hoxd12	chr2	73288324	73289323	1000
chr2_74511740_74514909_Hoxd12	chr2	75905324	75906323	1000
chr2_74503399_74506910_Hoxd13	chr2	73817154	73818153	1000
chr2_74503399_74506910_Hoxd13	chr2	74524154	74525153	1000
chr2_74535540_74538148_Hoxd9	chr2	73409844	73410843	1000
chr2_74535540_74538148_Hoxd9	chr2	74524844	74525843	1000
chr7_149844910_149848135_Igf2	chr7	148399522	148400521	1000
chr7_149844910_149848135_Igf2	chr7	149701522	149702521	1000
chr7_149844910_149848135_Igf2	chr7	149713522	149714521	1000
chr7_149844910_149848135_Igf2	chr7	149732522	149733521	1000
chr8_87499950_87503039_Junb	chr8	87186494	87187493	1000
chr15_38228931_38232336_Klf10	chr15	36984634	36985633	1000
chr15_38228931_38232336_Klf10	chr15	38447634	38448633	1000
chr4_118905023_118907974_Lepre1	chr4	117285498	117286497	1000
chr4_133573556_133576678_Lin28a	chr4	133226117	133227116	1000
chr6_134514703_134517662_Lrp6	chr6	134877182	134878181	1000
chr3_29908469_29911947_Mecom	chr3	30185208	30186207	1000
chr12_37833973_37836746_Meox2	chr12	36883360	36884359	1000
chr12_37833973_37836746_Meox2	chr12	37042360	37043359	1000
chr13_53566820_53569410_Msx2	chr13	54724115	54725114	1000
chr11_104410121_104412681_Myl4	chr11	106076401	106077400	1000
chr10_127102912_127105995_Nab2	chr10	127742454	127743453	1000
chr8_109816757_109819476_Nfat5	chr8	111230116	111231115	1000
chr8_108581976_108584920_Nfatc3	chr8	108161448	108162447	1000
chr14_56442510_56445943_Nfatc4	chr14	57396226	57397225	1000
chr8_87320883_87323459_Nfix	chr8	87244171	87245170	1000
chr8_87320883_87323459_Nfix	chr8	87264171	87265170	1000
chr3_135351946_135355572_Nfkb1	chr3	135083759	135084758	1000
chr11_70467133_70469959_Pfn1	chr11	69135546	69136545	1000
chr2_30699700_30701855_Prrx2	chr2	30271778	30272777	1000
chr2_30699700_30701855_Prrx2	chr2	30273778	30274777	1000
chr2_30699700_30701855_Prrx2	chr2	32176778	32177777	1000
chr11_106116504_106117972_Psmc5	chr11	105175238	105176237	1000
chr5_123677462_123679523_Psmd9	chr5	121903492	121904491	1000
chr13_63665654_63670664_Ptch1	chr13	63629159	63630158	1000
chr13_63665654_63670664_Ptch1	chr13	63915159	63916158	1000
chr11_98798642_98800671_Rara	chr11	98827656	98828655	1000
chr11_98821857_98823528_Rara	chr11	96837692	96838691	1000
chr11_98821857_98823528_Rara	chr11	99088692	99089691	1000
chr14_73724127_73727004_Rb1	chr14	73001566	73002565	1000
chr19_5636396_5639143_Rela	chr19	5608770	5609769	1000
chr2_51927686_51930368_Rif1	chr2	50993027	50994026	1000
chr6_88414920_88416449_Ruvbl1	chr6	88848684	88849683	1000
chr3_66784461_66787957_Shox2	chr3	66776209	66777208	1000
chr3_66784461_66787957_Shox2	chr3	66779209	66780208	1000
chr10_62800480_62802503_Sirt1	chr10	62113492	62114491	1000
chr4_154593802_154596613_Ski	chr4	154550208	154551207	1000
chr9_63604233_63607322_Smad3	chr9	62191778	62192777	1000
chr18_75525548_75529772_Smad7	chr18	75623660	75624659	1000
chr9_21420114_21421636_Smarca4	chr9	21527875	21528874	1000
chr9_21420114_21421636_Smarca4	chr9	21571875	21572874	1000
chr12_28025698_28028497_Sox11	chr12	28152098	28153097	1000
chr6_144155558_144157976_Sox5	chr6	144892767	144893766	1000
chr7_123174364_123178112_Sox6	chr7	122643238	122644237	1000
chr7_123174364_123178112_Sox6	chr7	122645238	122646237	1000
chr11_112641359_112646504_Sox9	chr11	111424932	111425931	1000
chr11_112641359_112646504_Sox9	chr11	111822932	111823931	1000
chr11_96878986_96880992_Sp6	chr11	96836989	96837988	1000
chr11_50023598_50024962_Sqstm1	chr11	51076280	51077279	1000
chr11_100799145_100801066_Stat3	chr11	98955106	98956105	1000
chr18_60782378_60785115_Synpo	chr18	60828746	60829745	1000
chr6_52662811_52665204_Tax1bp1	chr6	50933008	50934007	1000
chr6_52662811_52665204_Tax1bp1	chr6	50935008	50936007	1000
chr6_52662811_52665204_Tax1bp1	chr6	51118008	51119007	1000
chr3_99058023_99061810_Tbx15	chr3	99732916	99733915	1000
chr3_99058023_99061810_Tbx15	chr3	99736916	99737915	1000
chr5_120118007_120121035_Tbx3	chr5	118913521	118914520	1000
chr11_85702310_85705082_Tbx4	chr11	85651696	85652695	1000
chr5_120282740_120286014_Tbx5	chr5	118695377	118696376	1000
chr7_133923872_133926827_Tbx6	chr7	133934350	133935349	1000
chr7_133923872_133926827_Tbx6	chr7	134338350	134339349	1000
chr18_69751407_69754269_Tcf4	chr18	68868838	68869837	1000
chr18_69751407_69754269_Tcf4	chr18	69072838	69073837	1000
chr6_72737065_72739646_Tcf7l1	chr6	72607356	72608355	1000
chr19_55815031_55819344_Tcf7l2	chr19	55674188	55675187	1000
chr7_26471403_26474526_Tgfb1	chr7	26537964	26538963	1000
chr7_26471403_26474526_Tgfb1	chr7	27978964	27979963	1000
chr7_149626419_149629008_Tnni2	chr7	149716714	149717713	1000
chr7_149626419_149629008_Tnni2	chr7	149745714	149746713	1000
chr15_98763803_98766015_Tuba1b	chr15	98709909	98710908	1000
chr15_98763803_98766015_Tuba1b	chr15	98783909	98784908	1000
chr15_98763803_98766015_Tuba1b	chr15	98821909	98822908	1000
chr17_25409415_25412199_Ube2i	chr17	25151807	25152806	1000
chr10_38882360_38884604_Wisp3	chr10	39253482	39254481	1000
chr3_104763632_104766963_Wnt2b	chr3	104591298	104592297	1000
chr14_29317453_29320874_Wnt5a	chr14	30781164	30782163	1000
chr7_30879614_30880927_Zfp260	chr7	29136270	29137269	1000
chr7_30879614_30880927_Zfp260	chr7	29586270	29587269	1000
chr8_44391769_44393212_Zfp42	chr8	43073490	43074489	1000
chr8_44391769_44393212_Zfp42	chr8	46020490	46021489	1000
chr8_90484546_90487815_Zfp423	chr8	90361180	90362179	1000
chr5_139059130_139061688_Zfp68	chr5	137788409	137789408	1000

## Sheet: HL_E10.5
viewpoint	chrom	start	end	width
chr7_149844910_149848135_Igf2	chr7	149719522	149749521	30000
chr1_164147278_164148832_Dnm3os	chr1	163928055	163957054	29000
chr2_18599399_18601713_Bmi1	chr2	17960556	17980555	20000
chr6_52195252_52198732_Hoxa11	chr6	51116992	51136991	20000
chr12_12946427_12949861_Mycn	chr12	13187144	13206143	19000
chr6_52195252_52198732_Hoxa11	chr6	50923992	50937991	14000
chr6_52211035_52213106_Hoxa13	chr6	51119070	51133069	14000
chr9_64988092_64990778_Igdcc3	chr9	65002435	65016434	14000
chr1_164147278_164148832_Dnm3os	chr1	163911055	163923054	12000
chr15_102795404_102798730_Hoxc10	chr15	103126067	103138066	12000
chr15_102805257_102807929_Hoxc9	chr15	103125593	103137592	12000
chr3_29908469_29911947_Mecom	chr3	30403208	30415207	12000
chr12_12946427_12949861_Mycn	chr12	12585144	12597143	12000
chr15_102784024_102787175_Hoxc11	chr15	103126600	103137599	11000
chr11_18917640_18921970_Meis1	chr11	18769805	18780804	11000
chr12_34641628_34643879_Twist1	chr12	34897754	34908753	11000
chr15_102795404_102798730_Hoxc10	chr15	102835067	102845066	10000
chr9_64988092_64990778_Igdcc3	chr9	65018435	65028434	10000
chr10_119910594_119913110_Hmga2	chr10	119682852	119691851	9000
chr6_52195252_52198732_Hoxa11	chr6	52911992	52920991	9000
chr6_52211035_52213106_Hoxa13	chr6	52912070	52921069	9000
chr15_102805257_102807929_Hoxc9	chr15	102834593	102843592	9000
chr9_64988092_64990778_Igdcc3	chr9	65036435	65045434	9000
chr2_33493858_33498287_Lmx1b	chr2	33557072	33566071	9000
chr2_33493858_33498287_Lmx1b	chr2	33568072	33577071	9000
chr15_61816019_61819798_Myc	chr15	63018908	63027907	9000
chr8_90484546_90487815_Zfp423	chr8	90353180	90362179	9000
chr13_15553739_15557248_Gli3	chr13	15638494	15646493	8000
chr6_52195252_52198732_Hoxa11	chr6	50949992	50957991	8000
chr2_74535540_74538148_Hoxd9	chr2	75186844	75194843	8000
chr7_149844910_149848135_Igf2	chr7	149665522	149673521	8000
chr10_45188881_45191794_Lin28b	chr10	45498338	45506337	8000
chr7_149626419_149629008_Tnni2	chr7	149718714	149726713	8000
chr6_4455175_4458605_Col1a2	chr6	5329890	5336889	7000
chr18_35019556_35021798_Egr1	chr18	35718677	35725676	7000
chr13_15553739_15557248_Gli3	chr13	15432494	15439493	7000
chr10_119910594_119913110_Hmga2	chr10	120153852	120160851	7000
chr10_119910594_119913110_Hmga2	chr10	120306852	120313851	7000
chr15_102795404_102798730_Hoxc10	chr15	102811067	102818066	7000
chr2_74528796_74531118_Hoxd10	chr2	75186957	75193956	7000
chr2_74528796_74531118_Hoxd10	chr2	75274957	75281956	7000
chr10_119638151_119640580_Irak3	chr10	120306366	120313365	7000
chr3_29908469_29911947_Mecom	chr3	30315208	30322207	7000
chr5_38213280_38216792_Msx1	chr5	38283036	38290035	7000
chr14_56442510_56445943_Nfatc4	chr14	56469226	56476225	7000
chr13_55931559_55934572_Pitx1	chr13	56059066	56066065	7000
chr13_55931559_55934572_Pitx1	chr13	56258066	56265065	7000
chr1_165241834_165244894_Prrx1	chr1	165284364	165291363	7000
chr1_165241834_165244894_Prrx1	chr1	165771364	165778363	7000
chr9_63867549_63870701_Smad6	chr9	63804125	63811124	7000
chr6_52662811_52665204_Tax1bp1	chr6	51123008	51130007	7000
chr3_99058023_99061810_Tbx15	chr3	99465916	99472915	7000
chr11_85702310_85705082_Tbx4	chr11	85772696	85779695	7000
chr15_50719712_50722752_Trps1	chr15	51626232	51633231	7000
chr12_34641628_34643879_Twist1	chr12	34881754	34888753	7000
chr1_38682506_38686209_Aff3	chr1	38566358	38572357	6000
chr7_140205030_140208448_Ctbp2	chr7	140824739	140830738	6000
chr7_140314221_140317388_Ctbp2	chr7	140824804	140830803	6000
chr6_84534909_84538416_Cyp26b1	chr6	84814662	84820661	6000
chr1_77510639_77513124_Epha4	chr1	76859882	76865881	6000
chr10_119910594_119913110_Hmga2	chr10	120235852	120241851	6000
chr2_74528796_74531118_Hoxd10	chr2	74982957	74988956	6000
chr2_74528796_74531118_Hoxd10	chr2	75258957	75264956	6000
chr2_74528796_74531118_Hoxd10	chr2	75350957	75356956	6000
chr2_74517642_74520443_Hoxd11	chr2	74983042	74989041	6000
chr2_74535540_74538148_Hoxd9	chr2	74982844	74988843	6000
chr2_74535540_74538148_Hoxd9	chr2	75258844	75264843	6000
chr2_74535540_74538148_Hoxd9	chr2	75276844	75282843	6000
chr2_74535540_74538148_Hoxd9	chr2	75350844	75356843	6000
chr2_74535540_74538148_Hoxd9	chr2	75420844	75426843	6000
chr2_152561579_152563298_Id1	chr2	152530438	152536437	6000
chr3_29908469_29911947_Mecom	chr3	30000208	30006207	6000
chr3_29908469_29911947_Mecom	chr3	30116208	30122207	6000
chr3_29908469_29911947_Mecom	chr3	30124208	30130207	6000
chr15_61816019_61819798_Myc	chr15	62880908	62886907	6000
chr11_51910567_51914502_Ppp2ca	chr11	51811534	51817533	6000
chr1_165241834_165244894_Prrx1	chr1	165780364	165786363	6000
chr1_165241834_165244894_Prrx1	chr1	165824364	165830363	6000
chr12_74212462_74215129_Six4	chr12	74619796	74625795	6000
chr18_60782378_60785115_Synpo	chr18	60828746	60834745	6000
chr12_34641628_34643879_Twist1	chr12	35319754	35325753	6000
chr15_80084611_80087550_Atf4	chr15	80627080	80632079	5000
chr2_18599399_18601713_Bmi1	chr2	17947556	17952555	5000
chr11_94796731_94799690_Col1a1	chr11	94740210	94745209	5000
chr6_117117047_117119951_Cxcl12	chr6	117354499	117359498	5000
chr19_37771291_37773877_Cyp26a1	chr19	37979584	37984583	5000
chr19_37758209_37760884_Cyp26c1	chr19	37979546	37984545	5000
chr1_164147278_164148832_Dnm3os	chr1	163981055	163986054	5000
chr1_77510639_77513124_Epha4	chr1	76003882	76008881	5000
chr1_14297789_14300826_Eya1	chr1	13849308	13854307	5000
chr1_14297789_14300826_Eya1	chr1	14500308	14505307	5000
chr8_26628987_26631865_Fgfr1	chr8	26651426	26656425	5000
chr12_86812679_86816216_Fos	chr12	86794448	86799447	5000
chr13_15553739_15557248_Gli3	chr13	15649494	15654493	5000
chr1_180252359_180254574_Gm16586	chr1	181385466	181390465	5000
chr1_165332110_165335732_Gorab	chr1	165824921	165829920	5000
chr8_59799231_59802712_Hand2	chr8	59805972	59810971	5000
chr12_75007551_75011578_Hif1a	chr12	73858564	73863563	5000
chr10_119910594_119913110_Hmga2	chr10	119986852	119991851	5000
chr10_119910594_119913110_Hmga2	chr10	120142852	120147851	5000
chr10_119910594_119913110_Hmga2	chr10	120285852	120290851	5000
chr6_52195252_52198732_Hoxa11	chr6	50941992	50946991	5000
chr6_52195252_52198732_Hoxa11	chr6	51143992	51148991	5000
chr6_52211035_52213106_Hoxa13	chr6	51144070	51149069	5000
chr15_102848536_102851167_Hoxc4	chr15	102886852	102891851	5000
chr15_102805257_102807929_Hoxc9	chr15	102812593	102817592	5000
chr2_74528796_74531118_Hoxd10	chr2	75420957	75425956	5000
chr2_74528796_74531118_Hoxd10	chr2	75493957	75498956	5000
chr2_74528796_74531118_Hoxd10	chr2	75905957	75910956	5000
chr2_74517642_74520443_Hoxd11	chr2	75259042	75264041	5000
chr2_74517642_74520443_Hoxd11	chr2	75421042	75426041	5000
chr2_74511740_74514909_Hoxd12	chr2	73788324	73793323	5000
chr2_74535540_74538148_Hoxd9	chr2	74521844	74526843	5000
chr2_74535540_74538148_Hoxd9	chr2	75034844	75039843	5000
chr2_74535540_74538148_Hoxd9	chr2	75044844	75049843	5000
chr2_74535540_74538148_Hoxd9	chr2	75493844	75498843	5000
chr2_74535540_74538148_Hoxd9	chr2	75905844	75910843	5000
chr7_75095274_75099424_Igf1r	chr7	75272349	75277348	5000
chr3_29908469_29911947_Mecom	chr3	29982208	29987207	5000
chr3_29908469_29911947_Mecom	chr3	30110208	30115207	5000
chr11_18917640_18921970_Meis1	chr11	18781805	18786804	5000
chr12_37833973_37836746_Meox2	chr12	37516360	37521359	5000
chr5_38213280_38216792_Msx1	chr5	38357036	38362035	5000
chr12_12946427_12949861_Mycn	chr12	13053144	13058143	5000
chr1_170359699_170361825_Pbx1	chr1	170310762	170315761	5000
chr1_170359699_170361825_Pbx1	chr1	171165762	171170761	5000
chr17_24685553_24689486_Pkd1	chr17	24774520	24779519	5000
chr1_165241834_165244894_Prrx1	chr1	165302364	165307363	5000
chr1_165241834_165244894_Prrx1	chr1	165371364	165376363	5000
chr11_98821857_98823528_Rara	chr11	98802692	98807691	5000
chr3_66784461_66787957_Shox2	chr3	66176209	66181208	5000
chr12_74144893_74148226_Six1	chr12	74620560	74625559	5000
chr18_75525548_75529772_Smad7	chr18	75365660	75370659	5000
chr18_75525548_75529772_Smad7	chr18	75420660	75425659	5000
chr12_28025698_28028497_Sox11	chr12	28247098	28252097	5000
chr7_123174364_123178112_Sox6	chr7	122787238	122792237	5000
chr11_112641359_112646504_Sox9	chr11	111820932	111825931	5000
chr3_21973234_21977082_Tbl1xr1	chr3	21461158	21466157	5000
chr3_21973234_21977082_Tbl1xr1	chr3	21832158	21837157	5000
chr3_99058023_99061810_Tbx15	chr3	99612916	99617915	5000
chr9_87624412_87627364_Tbx18	chr9	87877888	87882887	5000
chr9_87624412_87627364_Tbx18	chr9	87961888	87966887	5000
chr19_55815031_55819344_Tcf7l2	chr19	55664188	55669187	5000
chr19_55815031_55819344_Tcf7l2	chr19	56177188	56182187	5000
chr14_32020383_32023474_Tnnc1	chr14	32244928	32249927	5000
chr7_149626419_149629008_Tnni2	chr7	149730714	149735713	5000
chr7_149626419_149629008_Tnni2	chr7	149742714	149747713	5000
chr4_43534335_43537745_Tpm2	chr4	43569040	43574039	5000
chr15_50719712_50722752_Trps1	chr15	50495232	50500231	5000
chr12_34641628_34643879_Twist1	chr12	34274754	34279753	5000
chr10_81022383_81023877_Aes	chr10	81067130	81071129	4000
chr1_38682506_38686209_Aff3	chr1	38813358	38817357	4000
chr3_107396355_107399573_Alx3	chr3	107383964	107387963	4000
chr2_73728822_73731611_Atf2	chr2	74523216	74527215	4000
chr15_80084611_80087550_Atf4	chr15	81701080	81705079	4000
chr6_4455175_4458605_Col1a2	chr6	5057890	5061889	4000
chr9_54611791_54613863_Crabp1	chr9	54650827	54654826	4000
chr9_54611791_54613863_Crabp1	chr9	54663827	54667826	4000
chr9_120841457_120844370_Ctnnb1	chr9	120598914	120602913	4000
chr6_6829460_6831986_Dlx5	chr6	5777723	5781722	4000
chr6_6813961_6817080_Dlx6	chr6	5777520	5781519	4000
chr18_35019556_35021798_Egr1	chr18	35711677	35715676	4000
chr1_77510639_77513124_Epha4	chr1	75780882	75784881	4000
chr1_77510639_77513124_Epha4	chr1	75827882	75831881	4000
chr1_77510639_77513124_Epha4	chr1	76890882	76894881	4000
chr2_74495971_74499159_Evx2	chr2	73788565	73792564	4000
chr14_58689528_58694260_Fgf9	chr14	59819894	59823893	4000
chr12_86812679_86816216_Fos	chr12	86712448	86716447	4000
chr12_86812679_86816216_Fos	chr12	86824448	86828447	4000
chr10_56096124_56099464_Gja1	chr10	56638794	56642793	4000
chr1_120948787_120951013_Gli2	chr1	120800900	120804899	4000
chr1_180252359_180254574_Gm16586	chr1	180263466	180267465	4000
chr1_165332110_165335732_Gorab	chr1	165774921	165778920	4000
chr12_105709730_105713337_Gsc	chr12	105871534	105875533	4000
chr15_102805257_102807929_Hoxc9	chr15	102790593	102794592	4000
chr2_74528796_74531118_Hoxd10	chr2	75034957	75038956	4000
chr2_74528796_74531118_Hoxd10	chr2	75328957	75332956	4000
chr2_74517642_74520443_Hoxd11	chr2	73789042	73793041	4000
chr2_74511740_74514909_Hoxd12	chr2	74983324	74987323	4000
chr2_74503399_74506910_Hoxd13	chr2	73789154	73793153	4000
chr2_74535540_74538148_Hoxd9	chr2	75328844	75332843	4000
chr2_74535540_74538148_Hoxd9	chr2	75539844	75543843	4000
chr12_25778545_25781441_Id2	chr12	26216993	26220992	4000
chr10_87321504_87324810_Igf1	chr10	87506157	87510156	4000
chr7_149844910_149848135_Igf2	chr7	149642522	149646521	4000
chr7_149844910_149848135_Igf2	chr7	149693522	149697521	4000
chr10_45188881_45191794_Lin28b	chr10	45578338	45582337	4000
chr10_45204558_45207471_Lin28b	chr10	45524014	45528013	4000
chr2_33493858_33498287_Lmx1b	chr2	33487072	33491071	4000
chr11_98053496_98054837_Med1	chr11	97561166	97565165	4000
chr11_18917640_18921970_Meis1	chr11	18656805	18660804	4000
chr11_18917640_18921970_Meis1	chr11	19248805	19252804	4000
chr12_12946427_12949861_Mycn	chr12	13253144	13257143	4000
chr12_57795188_57798514_Pax9	chr12	58050851	58054850	4000
chr13_55931559_55934572_Pitx1	chr13	55854066	55858065	4000
chr2_30699700_30701855_Prrx2	chr2	30324778	30328777	4000
chr2_30699700_30701855_Prrx2	chr2	30690778	30694777	4000
chr13_63665654_63670664_Ptch1	chr13	64051159	64055158	4000
chr11_98798642_98800671_Rara	chr11	99006656	99010655	4000
chr11_98821857_98823528_Rara	chr11	98762692	98766691	4000
chr8_91564336_91569242_Sall1	chr8	91976789	91980788	4000
chr2_168590196_168593796_Sall4	chr2	168695996	168699995	4000
chr3_66784461_66787957_Shox2	chr3	65776209	65780208	4000
chr3_66784461_66787957_Shox2	chr3	66338209	66342208	4000
chr4_154593802_154596613_Ski	chr4	154548208	154552207	4000
chr9_63867549_63870701_Smad6	chr9	64983125	64987124	4000
chr12_28025698_28028497_Sox11	chr12	27217098	27221097	4000
chr11_112641359_112646504_Sox9	chr11	111427932	111431931	4000
chr6_52662811_52665204_Tax1bp1	chr6	52200008	52204007	4000
chr9_87624412_87627364_Tbx18	chr9	87280888	87284887	4000
chr6_72737065_72739646_Tcf7l1	chr6	72564356	72568355	4000
chr6_72737065_72739646_Tcf7l1	chr6	72659356	72663355	4000
chr19_55815031_55819344_Tcf7l2	chr19	56172188	56176187	4000
chr2_172375912_172378889_Tfap2c	chr2	172484400	172488399	4000
chr2_172375912_172378889_Tfap2c	chr2	172563400	172567399	4000
chr15_50719712_50722752_Trps1	chr15	51662232	51666231	4000
chr15_98763803_98766015_Tuba1b	chr15	98821909	98825908	4000
chr13_89878065_89882877_Vcan	chr13	90898471	90902470	4000
chr15_98619059_98621568_Wnt1	chr15	98395314	98399313	4000
chr3_104763632_104766963_Wnt2b	chr3	104591298	104595297	4000
chr7_30879614_30880927_Zfp260	chr7	29163270	29167269	4000
chr18_14128669_14133943_Zfp521	chr18	13757306	13761305	4000
chr18_14128669_14133943_Zfp521	chr18	14275306	14279305	4000
chr10_78559712_78561364_2610008E11Rik	chr10	78034538	78037537	3000
chr9_71062568_71065630_Aldh1a2	chr9	71331099	71334098	3000
chr2_93480400_93484710_Alx4	chr2	93455555	93458554	3000
chr15_80084611_80087550_Atf4	chr15	79911080	79914079	3000
chr15_80084611_80087550_Atf4	chr15	81228080	81231079	3000
chr2_18599399_18601713_Bmi1	chr2	17981556	17984555	3000
chr14_47008455_47011065_Bmp4	chr14	47222760	47225759	3000
chr9_75622085_75625629_Bmp5	chr9	76082857	76085856	3000
chr16_15886577_15889028_Cebpd	chr16	16301802	16304801	3000
chr6_4455175_4458605_Col1a2	chr6	5051890	5054889	3000
chr6_4455175_4458605_Col1a2	chr6	5338890	5341889	3000
chr6_117117047_117119951_Cxcl12	chr6	117856499	117859498	3000
chr6_84534909_84538416_Cyp26b1	chr6	84177662	84180661	3000
chr13_47199953_47203176_Dek	chr13	48638564	48641563	3000
chr1_164147278_164148832_Dnm3os	chr1	164007055	164010054	3000
chr16_20516628_20519070_Dvl3	chr16	21208849	21211848	3000
chr11_44429866_44432944_Ebf1	chr11	44815405	44818404	3000
chr18_35019556_35021798_Egr1	chr18	35110677	35113676	3000
chr18_35019556_35021798_Egr1	chr18	35757677	35760676	3000
chr1_77510639_77513124_Epha4	chr1	75798882	75801881	3000
chr1_77510639_77513124_Epha4	chr1	76968882	76971881	3000
chr13_119501869_119505236_Fgf10	chr13	120195552	120198551	3000
chr14_58689528_58694260_Fgf9	chr14	59273894	59276893	3000
chr2_113596869_113600677_Grem1	chr2	113377773	113380772	3000
chr12_105709730_105713337_Gsc	chr12	106050534	106053533	3000
chr16_38087970_38092456_Gsk3b	chr16	37867213	37870212	3000
chr8_83016074_83018469_Gypa	chr8	82233272	82236271	3000
chr8_59799231_59802712_Hand2	chr8	59028972	59031971	3000
chr8_59799231_59802712_Hand2	chr8	59460972	59463971	3000
chr10_119910594_119913110_Hmga2	chr10	120180852	120183851	3000
chr6_52211035_52213106_Hoxa13	chr6	51134070	51137069	3000
chr11_96225871_96228956_Hoxb1	chr11	96169414	96172413	3000
chr11_96225871_96228956_Hoxb1	chr11	96178414	96181413	3000
chr15_102795404_102798730_Hoxc10	chr15	102583067	102586066	3000
chr15_102795404_102798730_Hoxc10	chr15	103044067	103047066	3000
chr15_102784024_102787175_Hoxc11	chr15	102502600	102505599	3000
chr15_102784024_102787175_Hoxc11	chr15	102777600	102780599	3000
chr2_74528796_74531118_Hoxd10	chr2	74521957	74524956	3000
chr2_74528796_74531118_Hoxd10	chr2	75046957	75049956	3000
chr4_135698434_135701733_Id3	chr4	134479084	134482083	3000
chr17_12958114_12962181_Igf2r	chr17	12973148	12976147	3000
chr4_56813939_56817328_Ikbkap	chr4	55362634	55365633	3000
chr8_87499950_87503039_Junb	chr8	86720494	86723493	3000
chr8_87499950_87503039_Junb	chr8	87549494	87552493	3000
chr3_130812216_130815371_Lef1	chr3	130519794	130522793	3000
chr10_45204558_45207471_Lin28b	chr10	45498014	45501013	3000
chr7_116312489_116314550_Lmo1	chr7	116338520	116341519	3000
chr3_29908469_29911947_Mecom	chr3	30155208	30158207	3000
chr13_83662041_83665144_Mef2c	chr13	81921592	81924591	3000
chr11_18917640_18921970_Meis1	chr11	18612805	18615804	3000
chr15_61816019_61819798_Myc	chr15	63586908	63589907	3000
chr1_66989705_66991844_Myl1	chr1	65223774	65226773	3000
chr10_127102912_127105995_Nab2	chr10	127472454	127475453	3000
chr19_46378354_46380862_Nfkb2	chr19	46149608	46152607	3000
chr11_70467133_70469959_Pfn1	chr11	69832546	69835545	3000
chr17_21080536_21083642_Ppp2r1a	chr17	21703089	21706088	3000
chr1_152313670_152315414_Prg4	chr1	153190542	153193541	3000
chr11_98798642_98800671_Rara	chr11	98993656	98996655	3000
chr11_98821857_98823528_Rara	chr11	98786692	98789691	3000
chr14_73724127_73727004_Rb1	chr14	73000566	73003565	3000
chr2_157028826_157031627_Rbl1	chr2	157853226	157856225	3000
chr12_74144893_74148226_Six1	chr12	74467560	74470559	3000
chr18_75525548_75529772_Smad7	chr18	75593660	75596659	3000
chr9_21420114_21421636_Smarca4	chr9	21349875	21352874	3000
chr9_21420114_21421636_Smarca4	chr9	21600875	21603874	3000
chr12_28025698_28028497_Sox11	chr12	28155098	28158097	3000
chr12_28025698_28028497_Sox11	chr12	28970098	28973097	3000
chr7_123174364_123178112_Sox6	chr7	122706238	122709237	3000
chr11_112641359_112646504_Sox9	chr11	111679932	111682931	3000
chr11_112641359_112646504_Sox9	chr11	112873932	112876931	3000
chr3_21973234_21977082_Tbl1xr1	chr3	21436158	21439157	3000
chr3_99058023_99061810_Tbx15	chr3	99512916	99515915	3000
chr9_87624412_87627364_Tbx18	chr9	87916888	87919887	3000
chr11_85702310_85705082_Tbx4	chr11	85687696	85690695	3000
chr7_133923872_133926827_Tbx6	chr7	133934350	133937349	3000
chr7_133923872_133926827_Tbx6	chr7	134338350	134341349	3000
chr10_79894922_79897158_Tcf3	chr10	79861040	79864039	3000
chr6_72737065_72739646_Tcf7l1	chr6	72602356	72605355	3000
chr13_56710029_56712867_Tgfbi	chr13	56683448	56686447	3000
chr13_56710029_56712867_Tgfbi	chr13	56700448	56703447	3000
chr4_53837159_53839746_Tmem38b	chr4	55362452	55365451	3000
chr7_149626419_149629008_Tnni2	chr7	149665714	149668713	3000
chr12_34641628_34643879_Twist1	chr12	34852754	34855753	3000
chr12_34641628_34643879_Twist1	chr12	34954754	34957753	3000
chr12_34641628_34643879_Twist1	chr12	35330754	35333753	3000
chr17_25409415_25412199_Ube2i	chr17	25320807	25323806	3000
chr17_25409415_25412199_Ube2i	chr17	25927807	25930806	3000
chr13_89878065_89882877_Vcan	chr13	90228471	90231470	3000
chr15_66721970_66723921_Wisp1	chr15	68087946	68090945	3000
chr4_136832571_136834778_Wnt4	chr4	136639674	136642673	3000
chr14_29317453_29320874_Wnt5a	chr14	29785164	29788163	3000
chr9_48642043_48645207_Zbtb16	chr9	48563625	48566624	3000
chr8_44391769_44393212_Zfp42	chr8	42632490	42635489	3000
chr8_90484546_90487815_Zfp423	chr8	90384180	90387179	3000
chr10_81022383_81023877_Aes	chr10	82323130	82325129	2000
chr11_76485118_76487158_Bhlha9	chr11	76575138	76577137	2000
chr18_46886623_46889064_Cdo1	chr18	46877844	46879843	2000
chr15_97832813_97835758_Col2a1	chr15	96527286	96529285	2000
chr5_33614803_33618159_Ctbp1	chr5	33693481	33695480	2000
chr6_117117047_117119951_Cxcl12	chr6	117429499	117431498	2000
chr6_117117047_117119951_Cxcl12	chr6	117866499	117868498	2000
chr13_47199953_47203176_Dek	chr13	49061564	49063563	2000
chr1_164147278_164148832_Dnm3os	chr1	164252055	164254054	2000
chr18_35019556_35021798_Egr1	chr18	35090677	35092676	2000
chr13_119501869_119505236_Fgf10	chr13	120279552	120281551	2000
chr16_28443899_28448279_Fgf12	chr16	27389089	27391088	2000
chr1_135933360_135936925_Fmod	chr1	135591142	135593141	2000
chr5_4756129_4759451_Fzd1	chr5	4533790	4535789	2000
chr18_9211622_9214739_Fzd8	chr18	7870180	7872179	2000
chr1_120948787_120951013_Gli2	chr1	120797900	120799899	2000
chr1_120948787_120951013_Gli2	chr1	120811900	120813899	2000
chr13_15553739_15557248_Gli3	chr13	15633494	15635493	2000
chr1_180252359_180254574_Gm16586	chr1	181133466	181135465	2000
chr13_112278206_112281506_Gpbp1	chr13	110613856	110615855	2000
chr8_59799231_59802712_Hand2	chr8	59311972	59313971	2000
chr8_59799231_59802712_Hand2	chr8	59438972	59440971	2000
chr11_74982141_74984745_Hic1	chr11	74827443	74829442	2000
chr10_119910594_119913110_Hmga2	chr10	119709852	119711851	2000
chr5_115419129_115421530_Hnf1a	chr5	115520330	115522329	2000
chr6_52195252_52198732_Hoxa11	chr6	52898992	52900991	2000
chr6_52211035_52213106_Hoxa13	chr6	52899070	52901069	2000
chr11_96225871_96228956_Hoxb1	chr11	96163414	96165413	2000
chr11_96225871_96228956_Hoxb1	chr11	96504414	96506413	2000
chr15_102795404_102798730_Hoxc10	chr15	102826067	102828066	2000
chr15_102795404_102798730_Hoxc10	chr15	103071067	103073066	2000
chr15_102784024_102787175_Hoxc11	chr15	102579600	102581599	2000
chr15_102784024_102787175_Hoxc11	chr15	102583600	102585599	2000
chr15_102784024_102787175_Hoxc11	chr15	102792600	102794599	2000
chr15_102784024_102787175_Hoxc11	chr15	102837600	102839599	2000
chr15_102805257_102807929_Hoxc9	chr15	103070593	103072592	2000
chr2_74528796_74531118_Hoxd10	chr2	73788957	73790956	2000
chr2_74517642_74520443_Hoxd11	chr2	73559042	73561041	2000
chr2_74517642_74520443_Hoxd11	chr2	75190042	75192041	2000
chr2_152561579_152563298_Id1	chr2	152655438	152657437	2000
chr4_135698434_135701733_Id3	chr4	135606084	135608083	2000
chr13_117098820_117101206_Isl1	chr13	116010013	116012012	2000
chr17_23881797_23884110_Kremen2	chr17	23963954	23965953	2000
chr3_130812216_130815371_Lef1	chr3	130431794	130433793	2000
chr10_45188881_45191794_Lin28b	chr10	45524338	45526337	2000
chr10_45204558_45207471_Lin28b	chr10	45579014	45581013	2000
chr10_45204558_45207471_Lin28b	chr10	45608014	45610013	2000
chr2_33493858_33498287_Lmx1b	chr2	33501072	33503071	2000
chr19_3684281_3686353_Lrp5	chr19	3641317	3643316	2000
chr3_29908469_29911947_Mecom	chr3	30353208	30355207	2000
chr3_29908469_29911947_Mecom	chr3	30499208	30501207	2000
chr11_18917640_18921970_Meis1	chr11	18648805	18650804	2000
chr19_6334758_6337042_Men1	chr19	7290900	7292899	2000
chr5_38213280_38216792_Msx1	chr5	38474036	38476035	2000
chr1_170359699_170361825_Pbx1	chr1	170682762	170684761	2000
chr11_70467133_70469959_Pfn1	chr11	69483546	69485545	2000
chr11_70467133_70469959_Pfn1	chr11	70460546	70462545	2000
chr11_70467133_70469959_Pfn1	chr11	70481546	70483545	2000
chr1_152313670_152315414_Prg4	chr1	153274542	153276541	2000
chr1_165241834_165244894_Prrx1	chr1	163945364	163947363	2000
chr1_165241834_165244894_Prrx1	chr1	163948364	163950363	2000
chr1_165241834_165244894_Prrx1	chr1	163951364	163953363	2000
chr2_30699700_30701855_Prrx2	chr2	30295778	30297777	2000
chr2_30699700_30701855_Prrx2	chr2	30684778	30686777	2000
chr11_106116504_106117972_Psmc5	chr11	106077238	106079237	2000
chr11_98821857_98823528_Rara	chr11	98994692	98996691	2000
chr11_98821857_98823528_Rara	chr11	99008692	99010691	2000
chr19_5636396_5639143_Rela	chr19	5688770	5690769	2000
chr2_53936670_53939178_Rprm	chr2	53049924	53051923	2000
chr17_44870942_44874052_Runx2	chr17	45463497	45465496	2000
chr2_168590196_168593796_Sall4	chr2	168664996	168666995	2000
chr5_28790366_28793783_Shh	chr5	29641074	29643073	2000
chr4_154593802_154596613_Ski	chr4	154562208	154564207	2000
chr9_63867549_63870701_Smad6	chr9	63828125	63830124	2000
chr9_21420114_21421636_Smarca4	chr9	21527875	21529874	2000
chr9_21420114_21421636_Smarca4	chr9	21571875	21573874	2000
chr9_21420114_21421636_Smarca4	chr9	21806875	21808874	2000
chr12_28025698_28028497_Sox11	chr12	28095098	28097097	2000
chr6_144155558_144157976_Sox5	chr6	144893767	144895766	2000
chr7_123174364_123178112_Sox6	chr7	122642238	122644237	2000
chr7_123174364_123178112_Sox6	chr7	122645238	122647237	2000
chr15_102236459_102240226_Sp1	chr15	102300342	102302341	2000
chr11_85644477_85646356_Tbx2	chr11	85443416	85445415	2000
chr11_85702310_85705082_Tbx4	chr11	85829696	85831695	2000
chr18_69502950_69505851_Tcf4	chr18	69070400	69072399	2000
chr6_72737065_72739646_Tcf7l1	chr6	72606356	72608355	2000
chr2_172375912_172378889_Tfap2c	chr2	172759400	172761399	2000
chr4_126410484_126413651_Tfap2e	chr4	126233068	126235067	2000
chr4_53837159_53839746_Tmem38b	chr4	55016452	55018451	2000
chr15_50719712_50722752_Trps1	chr15	50577232	50579231	2000
chr15_98763803_98766015_Tuba1b	chr15	98699909	98701908	2000
chr1_93697637_93699620_Twist2	chr1	93497628	93499627	2000
chr15_97737969_97740523_Vdr	chr15	96469246	96471245	2000
chr10_120469988_120473103_Wif1	chr10	119686546	119688545	2000
chr10_38882360_38884604_Wisp3	chr10	39252482	39254481	2000
chr3_104763632_104766963_Wnt2b	chr3	104666298	104668297	2000
chr18_14128669_14133943_Zfp521	chr18	13191306	13193305	2000
chr15_101004077_101006768_Acvr1b	chr15	102341422	102342421	1000
chr2_73728822_73731611_Atf2	chr2	75496216	75497215	1000
chr15_80084611_80087550_Atf4	chr15	79779080	79780079	1000
chr15_80084611_80087550_Atf4	chr15	80065080	80066079	1000
chr7_133604926_133608287_Atp2a1	chr7	133617606	133618605	1000
chr16_19759451_19762171_B3gnt5	chr16	20299811	20300810	1000
chr4_123019023_123021504_Bmp8a	chr4	123088264	123089263	1000
chr1_59819819_59822208_Bmpr2	chr1	58480014	58481013	1000
chr7_152123023_152126810_Ccnd1	chr7	152392916	152393915	1000
chr18_46886623_46889064_Cdo1	chr18	46755844	46756843	1000
chr16_15886577_15889028_Cebpd	chr16	14162802	14163801	1000
chr14_52862331_52865565_Chd8	chr14	52641948	52642947	1000
chr14_52862331_52865565_Chd8	chr14	52813948	52814947	1000
chr17_25269574_25272870_Clcn7	chr17	25320222	25321221	1000
chr15_97832813_97835758_Col2a1	chr15	96290286	96291285	1000
chr8_72895934_72899081_Comp	chr8	73048508	73049507	1000
chr8_72895934_72899081_Comp	chr8	73063508	73064507	1000
chr7_140314221_140317388_Ctbp2	chr7	140224804	140225803	1000
chr7_140314221_140317388_Ctbp2	chr7	140228804	140229803	1000
chr9_120841457_120844370_Ctnnb1	chr9	120481914	120482913	1000
chr6_117117047_117119951_Cxcl12	chr6	118967499	118968498	1000
chr6_84534909_84538416_Cyp26b1	chr6	84975662	84976661	1000
chr10_96940927_96943536_Dcn	chr10	98747232	98748231	1000
chr13_47199953_47203176_Dek	chr13	46822564	46823563	1000
chr1_75355432_75357954_Des	chr1	75516693	75517692	1000
chr1_164147278_164148832_Dnm3os	chr1	163966055	163967054	1000
chr1_164147278_164148832_Dnm3os	chr1	164053055	164054054	1000
chr16_20516628_20519070_Dvl3	chr16	20610849	20611848	1000
chr11_44429866_44432944_Ebf1	chr11	44507405	44508404	1000
chr14_67851751_67855038_Ebf2	chr14	68002394	68003393	1000
chr10_66998706_67001124_Egr2	chr10	67741915	67742914	1000
chr15_81414980_81418011_Ep300	chr15	81228496	81229495	1000
chr15_81414980_81418011_Ep300	chr15	81230496	81231495	1000
chr15_81414980_81418011_Ep300	chr15	81297496	81298495	1000
chr13_119457951_119459272_Fgf10	chr13	120195612	120196611	1000
chr14_71040635_71042622_Fgf17	chr14	70868628	70869627	1000
chr11_33044944_33049171_Fgf18	chr11	33061058	33062057	1000
chr8_26628987_26631865_Fgfr1	chr8	26657426	26658425	1000
chr8_26628987_26631865_Fgfr1	chr8	28087426	28088425	1000
chr1_135933360_135936925_Fmod	chr1	135555142	135556141	1000
chr14_73108094_73111002_Fndc3a	chr14	73000548	73001547	1000
chr12_86812679_86816216_Fos	chr12	86680448	86681447	1000
chr12_86812679_86816216_Fos	chr12	88233448	88234447	1000
chr19_5447409_5449287_Fosl1	chr19	5425348	5426347	1000
chr5_32434356_32436464_Fosl2	chr5	32000410	32001409	1000
chr10_126776500_126779948_Gli1	chr10	127056224	127057223	1000
chr1_120948787_120951013_Gli2	chr1	120814900	120815899	1000
chr13_15553739_15557248_Gli3	chr13	15636494	15637493	1000
chr13_15553739_15557248_Gli3	chr13	15755494	15756493	1000
chr1_180252359_180254574_Gm16586	chr1	181107466	181108465	1000
chr13_112278206_112281506_Gpbp1	chr13	113372856	113373855	1000
chr8_59799231_59802712_Hand2	chr8	59026972	59027971	1000
chr8_59799231_59802712_Hand2	chr8	59441972	59442971	1000
chr8_59799231_59802712_Hand2	chr8	59813972	59814971	1000
chr12_75007551_75011578_Hif1a	chr12	76769564	76770563	1000
chr10_119910594_119913110_Hmga2	chr10	120178852	120179851	1000
chr10_119910594_119913110_Hmga2	chr10	120292852	120293851	1000
chr6_52195252_52198732_Hoxa11	chr6	52152992	52153991	1000
chr6_52195252_52198732_Hoxa11	chr6	52167992	52168991	1000
chr6_52195252_52198732_Hoxa11	chr6	52201992	52202991	1000
chr11_96054140_96056361_Hoxb13	chr11	96163250	96164249	1000
chr11_96054140_96056361_Hoxb13	chr11	96171250	96172249	1000
chr11_96054140_96056361_Hoxb13	chr11	96179250	96180249	1000
chr11_96054140_96056361_Hoxb13	chr11	96187250	96188249	1000
chr11_96131619_96133714_Hoxb9	chr11	96504666	96505665	1000
chr15_102795404_102798730_Hoxc10	chr15	102580067	102581066	1000
chr15_102795404_102798730_Hoxc10	chr15	102778067	102779066	1000
chr15_102784024_102787175_Hoxc11	chr15	102500600	102501599	1000
chr15_102784024_102787175_Hoxc11	chr15	102814600	102815599	1000
chr15_102805257_102807929_Hoxc9	chr15	102579593	102580592	1000
chr15_102805257_102807929_Hoxc9	chr15	102778593	102779592	1000
chr2_74528796_74531118_Hoxd10	chr2	75022957	75023956	1000
chr2_74517642_74520443_Hoxd11	chr2	74524042	74525041	1000
chr2_74517642_74520443_Hoxd11	chr2	75036042	75037041	1000
chr2_74517642_74520443_Hoxd11	chr2	75049042	75050041	1000
chr2_74517642_74520443_Hoxd11	chr2	75193042	75194041	1000
chr2_74517642_74520443_Hoxd11	chr2	75278042	75279041	1000
chr2_74517642_74520443_Hoxd11	chr2	75331042	75332041	1000
chr2_74517642_74520443_Hoxd11	chr2	75351042	75352041	1000
chr2_74517642_74520443_Hoxd11	chr2	75353042	75354041	1000
chr2_74517642_74520443_Hoxd11	chr2	75355042	75356041	1000
chr2_74511740_74514909_Hoxd12	chr2	75258324	75259323	1000
chr2_74511740_74514909_Hoxd12	chr2	75260324	75261323	1000
chr2_74511740_74514909_Hoxd12	chr2	75351324	75352323	1000
chr2_74511740_74514909_Hoxd12	chr2	75421324	75422323	1000
chr2_74503399_74506910_Hoxd13	chr2	74983154	74984153	1000
chr2_74535540_74538148_Hoxd9	chr2	75022844	75023843	1000
chr2_74535540_74538148_Hoxd9	chr2	75499844	75500843	1000
chr2_74535540_74538148_Hoxd9	chr2	75868844	75869843	1000
chr4_135698434_135701733_Id3	chr4	135694084	135695083	1000
chr4_135698434_135701733_Id3	chr4	135705084	135706083	1000
chr13_48355943_48358276_Id4	chr13	46821110	46822109	1000
chr10_87321504_87324810_Igf1	chr10	87610157	87611156	1000
chr7_149844910_149848135_Igf2	chr7	149658522	149659521	1000
chr7_149844910_149848135_Igf2	chr7	149709522	149710521	1000
chr7_149844910_149848135_Igf2	chr7	149712522	149713521	1000
chr7_149844910_149848135_Igf2	chr7	149752522	149753521	1000
chr13_16102561_16105504_Inhba	chr13	17787032	17788031	1000
chr13_117098820_117101206_Isl1	chr13	117266013	117267012	1000
chr13_115890083_115892736_Itga1	chr13	114404410	114405409	1000
chr15_38228931_38232336_Klf10	chr15	38447634	38448633	1000
chr3_130812216_130815371_Lef1	chr3	130838794	130839793	1000
chr4_133573556_133576678_Lin28a	chr4	135411117	135412116	1000
chr10_45188881_45191794_Lin28b	chr10	45527338	45528337	1000
chr10_45188881_45191794_Lin28b	chr10	45606338	45607337	1000
chr10_45188881_45191794_Lin28b	chr10	45608338	45609337	1000
chr10_45204558_45207471_Lin28b	chr10	45504014	45505013	1000
chr3_29908469_29911947_Mecom	chr3	30008208	30009207	1000
chr3_29908469_29911947_Mecom	chr3	30502208	30503207	1000
chr11_18917640_18921970_Meis1	chr11	17912805	17913804	1000
chr11_18917640_18921970_Meis1	chr11	18645805	18646804	1000
chr12_12946427_12949861_Mycn	chr12	12747144	12748143	1000
chr7_134353601_134355810_Mylpf	chr7	133934706	133935705	1000
chr18_80907970_80911700_Nfatc1	chr18	80665835	80666834	1000
chr15_35224058_35226836_Osr2	chr15	35490447	35491446	1000
chr1_170359699_170361825_Pbx1	chr1	170286762	170287761	1000
chr18_66617142_66619414_Pmaip1	chr18	65681278	65682277	1000
chr18_66617142_66619414_Pmaip1	chr18	65741278	65742277	1000
chr18_66617142_66619414_Pmaip1	chr18	65744278	65745277	1000
chr17_28369475_28373816_Ppard	chr17	28462646	28463645	1000
chr17_21080536_21083642_Ppp2r1a	chr17	21846089	21847088	1000
chr10_44177241_44180107_Prdm1	chr10	44319674	44320673	1000
chr1_165241834_165244894_Prrx1	chr1	165837364	165838363	1000
chr2_30699700_30701855_Prrx2	chr2	30682778	30683777	1000
chr2_30699700_30701855_Prrx2	chr2	30725778	30726777	1000
chr13_63665654_63670664_Ptch1	chr13	63915159	63916158	1000
chr6_147209685_147213258_Pthlh	chr6	148162472	148163471	1000
chr11_98798642_98800671_Rara	chr11	98956656	98957655	1000
chr11_98798642_98800671_Rara	chr11	99089656	99090655	1000
chr11_98798642_98800671_Rara	chr11	99091656	99092655	1000
chr11_98821857_98823528_Rara	chr11	98907692	98908691	1000
chr19_5636396_5639143_Rela	chr19	7051770	7052769	1000
chr2_53936670_53939178_Rprm	chr2	53047924	53048923	1000
chr12_110837272_110841113_Rtl1	chr12	110650192	110651191	1000
chr4_134706877_134709942_Runx3	chr4	134481410	134482409	1000
chr3_115416570_115419596_S1pr1	chr3	115709083	115710082	1000
chr2_168590196_168593796_Sall4	chr2	168683996	168684995	1000
chr2_168590196_168593796_Sall4	chr2	168687996	168688995	1000
chr2_168590196_168593796_Sall4	chr2	170045996	170046995	1000
chr3_66784461_66787957_Shox2	chr3	66549209	66550208	1000
chr3_66784461_66787957_Shox2	chr3	66873209	66874208	1000
chr3_66784461_66787957_Shox2	chr3	68395209	68396208	1000
chr4_154593802_154596613_Ski	chr4	154516208	154517207	1000
chr4_154593802_154596613_Ski	chr4	154574208	154575207	1000
chr4_154593802_154596613_Ski	chr4	154609208	154610207	1000
chr8_81920191_81923739_Smad1	chr8	80196965	80197964	1000
chr18_76399843_76403469_Smad2	chr18	78013656	78014655	1000
chr9_63604233_63607322_Smad3	chr9	65042778	65043777	1000
chr13_56803701_56807459_Smad5	chr13	56258580	56259579	1000
chr13_56803701_56807459_Smad5	chr13	56684580	56685579	1000
chr12_28025698_28028497_Sox11	chr12	27499098	27500097	1000
chr12_28025698_28028497_Sox11	chr12	27872098	27873097	1000
chr12_28025698_28028497_Sox11	chr12	28630098	28631097	1000
chr12_28025698_28028497_Sox11	chr12	28632098	28633097	1000
chr12_28025698_28028497_Sox11	chr12	28938098	28939097	1000
chr17_25706361_25708800_Sox8	chr17	25728580	25729579	1000
chr17_25706361_25708800_Sox8	chr17	25732580	25733579	1000
chr11_112641359_112646504_Sox9	chr11	111425932	111426931	1000
chr2_72814956_72817313_Sp3	chr2	72313134	72314133	1000
chr11_96878986_96880992_Sp6	chr11	96167989	96168988	1000
chr15_102195697_102197757_Sp7	chr15	100926727	100927726	1000
chr15_102195697_102197757_Sp7	chr15	102229727	102230726	1000
chr14_106295079_106298486_Spry2	chr14	105574782	105575781	1000
chr14_106295079_106298486_Spry2	chr14	106129782	106130781	1000
chr18_38759268_38762685_Spry4	chr18	38962976	38963975	1000
chr18_38759268_38762685_Spry4	chr18	38964976	38965975	1000
chr18_60782378_60785115_Synpo	chr18	60805746	60806745	1000
chr18_60782378_60785115_Synpo	chr18	60814746	60815745	1000
chr5_120118007_120121035_Tbx3	chr5	119395521	119396520	1000
chr11_85702310_85705082_Tbx4	chr11	85685696	85686695	1000
chr11_85702310_85705082_Tbx4	chr11	85697696	85698695	1000
chr11_85702310_85705082_Tbx4	chr11	85708696	85709695	1000
chr11_85702310_85705082_Tbx4	chr11	85727696	85728695	1000
chr10_79894922_79897158_Tcf3	chr10	79869040	79870039	1000
chr10_79894922_79897158_Tcf3	chr10	80139040	80140039	1000
chr18_69502950_69505851_Tcf4	chr18	69104400	69105399	1000
chr18_69751407_69754269_Tcf4	chr18	69070838	69071837	1000
chr19_55815031_55819344_Tcf7l2	chr19	55738188	55739187	1000
chr8_13337175_13340621_Tfdp1	chr8	11728898	11729897	1000
chr7_26471403_26474526_Tgfb1	chr7	27977964	27978963	1000
chr7_26471403_26474526_Tgfb1	chr7	28258964	28259963	1000
chr4_53837159_53839746_Tmem38b	chr4	54957452	54958451	1000
chr7_149626419_149629008_Tnni2	chr7	149641714	149642713	1000
chr7_149626419_149629008_Tnni2	chr7	149694714	149695713	1000
chr7_149626419_149629008_Tnni2	chr7	149712714	149713713	1000
chr7_149626419_149629008_Tnni2	chr7	149716714	149717713	1000
chr7_149626419_149629008_Tnni2	chr7	149727714	149728713	1000
chr7_149626419_149629008_Tnni2	chr7	149736714	149737713	1000
chr7_4464872_4466692_Tnnt1	chr7	3596782	3597781	1000
chr7_4464872_4466692_Tnnt1	chr7	3598782	3599781	1000
chr9_66894122_66897762_Tpm1	chr9	67027942	67028941	1000
chr9_66894122_66897762_Tpm1	chr9	67461942	67462941	1000
chr15_50719712_50722752_Trps1	chr15	50522232	50523231	1000
chr15_50719712_50722752_Trps1	chr15	50524232	50525231	1000
chr15_50719712_50722752_Trps1	chr15	50527232	50528231	1000
chr15_98763803_98766015_Tuba1b	chr15	98783909	98784908	1000
chr12_34641628_34643879_Twist1	chr12	35027754	35028753	1000
chr12_34641628_34643879_Twist1	chr12	35115754	35116753	1000
chr1_93697637_93699620_Twist2	chr1	93495628	93496627	1000
chr17_46165116_46169966_Vegfa	chr17	46023541	46024540	1000
chr10_120469988_120473103_Wif1	chr10	119710546	119711545	1000
chr10_38882360_38884604_Wisp3	chr10	37117482	37118481	1000
chr10_38882360_38884604_Wisp3	chr10	37355482	37356481	1000
chr10_38882360_38884604_Wisp3	chr10	39378482	39379481	1000
chr15_98619059_98621568_Wnt1	chr15	98400314	98401313	1000
chr7_105983038_105985614_Wnt11	chr7	106106326	106107325	1000
chr11_59103743_59106479_Wnt3a	chr11	59320111	59321110	1000
chr6_119492709_119495777_Wnt5b	chr6	119584243	119585242	1000
chr11_59118966_59122269_Wnt9a	chr11	59319618	59320617	1000
chr2_23010006_23012700_Yme1l1	chr2	22924353	22925352	1000
chr12_110030583_110033282_Yy1	chr12	111828932	111829931	1000
chr18_5591240_5594740_Zeb1	chr18	5371990	5372989	1000
chr18_5591240_5594740_Zeb1	chr18	6512990	6513989	1000
chr6_83864154_83865978_Zfml	chr6	84816066	84817065	1000
chr6_83864154_83865978_Zfml	chr6	84819066	84820065	1000
chr6_83864154_83865978_Zfml	chr6	84974066	84975065	1000
chr6_83864154_83865978_Zfml	chr6	85402066	85403065	1000
chr4_34829007_34832392_Zfp292	chr4	34497700	34498699	1000
chr8_44391769_44393212_Zfp42	chr8	46022490	46023489	1000
chr8_44391769_44393212_Zfp42	chr8	46084490	46085489	1000
chr8_90484546_90487815_Zfp423	chr8	90276180	90277179	1000
chr5_139059130_139061688_Zfp68	chr5	138054409	138055408	1000
chr14_57503946_57507329_Zmym2	chr14	57429638	57430637	1000

## Sheet: MB_E10.5
viewpoint	chrom	start	end	width
chr7_152123023_152126810_Ccnd1	chr7	152388916	152400915	12000
chr9_64988092_64990778_Igdcc3	chr9	65003435	65014434	11000
chr9_64988092_64990778_Igdcc3	chr9	65021435	65032434	11000
chr2_18599399_18601713_Bmi1	chr2	17947556	17956555	9000
chr2_18599399_18601713_Bmi1	chr2	17957556	17966555	9000
chr2_18599399_18601713_Bmi1	chr2	17969556	17978555	9000
chr15_98763803_98766015_Tuba1b	chr15	98818909	98826908	8000
chr6_52195252_52198732_Hoxa11	chr6	51116992	51123991	7000
chr14_56442510_56445943_Nfatc4	chr14	56469226	56476225	7000
chr1_42753399_42756355_Pou3f3	chr1	42313877	42320876	7000
chr19_55815031_55819344_Tcf7l2	chr19	55455188	55462187	7000
chr7_4464872_4466692_Tnnt1	chr7	4071782	4078781	7000
chr8_87320883_87323459_Nfix	chr8	87233171	87239170	6000
chr4_22415669_22418516_Pou3f2	chr4	23908092	23914091	6000
chr1_42753399_42756355_Pou3f3	chr1	41944877	41950876	6000
chr6_52662811_52665204_Tax1bp1	chr6	51118008	51124007	6000
chr15_98763803_98766015_Tuba1b	chr15	98811909	98817908	6000
chr12_53603896_53606591_Arhgap5	chr12	53933244	53938243	5000
chr6_4455175_4458605_Col1a2	chr6	5329890	5334889	5000
chr9_120841457_120844370_Ctnnb1	chr9	120525914	120530913	5000
chr6_52211035_52213106_Hoxa13	chr6	51119070	51124069	5000
chr3_29908469_29911947_Mecom	chr3	30313208	30318207	5000
chr3_29908469_29911947_Mecom	chr3	30404208	30409207	5000
chr12_12946427_12949861_Mycn	chr12	12686144	12691143	5000
chr1_42753399_42756355_Pou3f3	chr1	41211877	41216876	5000
chr1_42753399_42756355_Pou3f3	chr1	42765877	42770876	5000
chr11_106116504_106117972_Psmc5	chr11	106075238	106080237	5000
chr7_123174364_123178112_Sox6	chr7	122787238	122792237	5000
chr10_79894922_79897158_Tcf3	chr10	79859040	79864039	5000
chr19_55815031_55819344_Tcf7l2	chr19	55968188	55973187	5000
chr17_46165116_46169966_Vegfa	chr17	45870541	45875540	5000
chr9_48642043_48645207_Zbtb16	chr9	48501625	48506624	5000
chr18_5591240_5594740_Zeb1	chr18	5159990	5164989	5000
chr8_90484546_90487815_Zfp423	chr8	90352180	90357179	5000
chr10_81022383_81023877_Aes	chr10	79313130	79317129	4000
chr10_81022383_81023877_Aes	chr10	81067130	81071129	4000
chr10_86954965_86957633_Ascl1	chr10	86519299	86523298	4000
chr15_80084611_80087550_Atf4	chr15	80629080	80633079	4000
chr6_4455175_4458605_Col1a2	chr6	3459890	3463889	4000
chr3_87751526_87754777_Crabp2	chr3	87761152	87765151	4000
chr1_164147278_164148832_Dnm3os	chr1	163945055	163949054	4000
chr16_20516628_20519070_Dvl3	chr16	20608849	20612848	4000
chr18_35019556_35021798_Egr1	chr18	35819677	35823676	4000
chr1_122497168_122499210_En1	chr1	123073189	123077188	4000
chr19_5447409_5449287_Fosl1	chr19	5486348	5490347	4000
chr13_15553739_15557248_Gli3	chr13	15633494	15637493	4000
chr7_75095274_75099424_Igf1r	chr7	75272349	75276348	4000
chr4_118905023_118907974_Lepre1	chr4	117083498	117087497	4000
chr7_142906276_142909505_Mki67	chr7	144504890	144508889	4000
chr13_53566820_53569410_Msx2	chr13	51941115	51945114	4000
chr12_12946427_12949861_Mycn	chr12	12730144	12734143	4000
chr1_66989705_66991844_Myl1	chr1	65222774	65226773	4000
chr12_57795188_57798514_Pax9	chr12	58637851	58641850	4000
chr1_170359699_170361825_Pbx1	chr1	170285762	170289761	4000
chr11_70467133_70469959_Pfn1	chr11	70480546	70484545	4000
chr4_22415669_22418516_Pou3f2	chr4	23416092	23420091	4000
chr4_22415669_22418516_Pou3f2	chr4	23713092	23717091	4000
chr1_42753399_42756355_Pou3f3	chr1	41221877	41225876	4000
chr1_42753399_42756355_Pou3f3	chr1	41329877	41333876	4000
chr1_42753399_42756355_Pou3f3	chr1	42759877	42763876	4000
chr2_30699700_30701855_Prrx2	chr2	30295778	30299777	4000
chr2_51927686_51930368_Rif1	chr2	50664027	50668026	4000
chr2_51927686_51930368_Rif1	chr2	50999027	51003026	4000
chr2_53936670_53939178_Rprm	chr2	53047924	53051923	4000
chr3_66784461_66787957_Shox2	chr3	66128209	66132208	4000
chr12_28025698_28028497_Sox11	chr12	27315098	27319097	4000
chr3_21973234_21977082_Tbl1xr1	chr3	21833158	21837157	4000
chr6_72737065_72739646_Tcf7l1	chr6	72625356	72629355	4000
chr7_4464872_4466692_Tnnt1	chr7	3643782	3647781	4000
chr4_43534335_43537745_Tpm2	chr4	43570040	43574039	4000
chr9_48642043_48645207_Zbtb16	chr9	48468625	48472624	4000
chr7_30879614_30880927_Zfp260	chr7	29744270	29748269	4000
chr15_101004077_101006768_Acvr1b	chr15	102032422	102035421	3000
chr7_140205030_140208448_Ctbp2	chr7	140827739	140830738	3000
chr7_140314221_140317388_Ctbp2	chr7	140827804	140830803	3000
chr16_20516628_20519070_Dvl3	chr16	18809849	18812848	3000
chr18_35019556_35021798_Egr1	chr18	35091677	35094676	3000
chr16_28443899_28448279_Fgf12	chr16	27388089	27391088	3000
chr14_58689528_58694260_Fgf9	chr14	59821894	59824893	3000
chr19_5447409_5449287_Fosl1	chr19	5425348	5428347	3000
chr18_9211622_9214739_Fzd8	chr18	7868180	7871179	3000
chr2_74511740_74514909_Hoxd12	chr2	73747324	73750323	3000
chr2_74503399_74506910_Hoxd13	chr2	73747154	73750153	3000
chr4_135698434_135701733_Id3	chr4	135607084	135610083	3000
chr8_74841120_74844160_Klf2	chr8	73889640	73892639	3000
chr4_55543909_55546908_Klf4	chr4	54034408	54037407	3000
chr4_55543909_55546908_Klf4	chr4	54040408	54043407	3000
chr17_21080536_21083642_Ppp2r1a	chr17	21145089	21148088	3000
chr11_98821857_98823528_Rara	chr11	98786692	98789691	3000
chr19_5636396_5639143_Rela	chr19	5607770	5610769	3000
chr19_5636396_5639143_Rela	chr19	7490770	7493769	3000
chr4_134675185_134678341_Runx3	chr4	132685763	132688762	3000
chr2_168590196_168593796_Sall4	chr2	168664996	168667995	3000
chr18_75525548_75529772_Smad7	chr18	75593660	75596659	3000
chr12_28025698_28028497_Sox11	chr12	27218098	27221097	3000
chr7_123174364_123178112_Sox6	chr7	122865238	122868237	3000
chr11_96878986_96880992_Sp6	chr11	96836989	96839988	3000
chr10_79894922_79897158_Tcf3	chr10	79869040	79872039	3000
chr6_72737065_72739646_Tcf7l1	chr6	72564356	72567355	3000
chr7_4464872_4466692_Tnnt1	chr7	3578782	3581781	3000
chr15_98763803_98766015_Tuba1b	chr15	98699909	98702908	3000
chr17_46165116_46169966_Vegfa	chr17	45821541	45824540	3000
chr15_66721970_66723921_Wisp1	chr15	68088946	68091945	3000
chr15_98619059_98621568_Wnt1	chr15	98504314	98507313	3000
chr15_85409954_85412945_Wnt7b	chr15	85293450	85296449	3000
chr11_59118966_59122269_Wnt9a	chr11	59318618	59321617	3000
chr12_110030583_110033282_Yy1	chr12	111827932	111830931	3000
chr9_48642043_48645207_Zbtb16	chr9	48454625	48457624	3000
chr8_44391769_44393212_Zfp42	chr8	46082490	46085489	3000
chr10_81022383_81023877_Aes	chr10	80959130	80961129	2000
chr12_53603896_53606591_Arhgap5	chr12	52791244	52793243	2000
chr15_80084611_80087550_Atf4	chr15	81701080	81703079	2000
chr17_26273981_26276763_Axin1	chr17	25998372	26000371	2000
chr17_26273981_26276763_Axin1	chr17	27693372	27695371	2000
chr18_46886623_46889064_Cdo1	chr18	45172844	45174843	2000
chr18_46886623_46889064_Cdo1	chr18	46755844	46757843	2000
chr16_15886577_15889028_Cebpd	chr16	14314802	14316801	2000
chr15_97832813_97835758_Col2a1	chr15	96527286	96529285	2000
chr3_87751526_87754777_Crabp2	chr3	87775152	87777151	2000
chr5_33614803_33618159_Ctbp1	chr5	33719481	33721480	2000
chr6_117117047_117119951_Cxcl12	chr6	117829499	117831498	2000
chr6_117117047_117119951_Cxcl12	chr6	117856499	117858498	2000
chr1_164147278_164148832_Dnm3os	chr1	163936055	163938054	2000
chr18_35019556_35021798_Egr1	chr18	35723677	35725676	2000
chr10_66998706_67001124_Egr2	chr10	68813915	68815914	2000
chr15_81414980_81418011_Ep300	chr15	81296496	81298495	2000
chr13_119457951_119459272_Fgf10	chr13	120277612	120279611	2000
chr13_119501869_119505236_Fgf10	chr13	120277552	120279551	2000
chr5_4756129_4759451_Fzd1	chr5	4102790	4104789	2000
chr4_9769646_9772495_Gdf6	chr4	10801070	10803069	2000
chr10_56096124_56099464_Gja1	chr10	57205794	57207793	2000
chr10_56096124_56099464_Gja1	chr10	57502794	57504793	2000
chr1_180252359_180254574_Gm16586	chr1	180265466	180267465	2000
chr8_83016074_83018469_Gypa	chr8	82234272	82236271	2000
chr2_74517642_74520443_Hoxd11	chr2	73748042	73750041	2000
chr2_152561579_152563298_Id1	chr2	152655438	152657437	2000
chr13_48355943_48358276_Id4	chr13	48253110	48255109	2000
chr7_149844910_149848135_Igf2	chr7	149642522	149644521	2000
chr7_149844910_149848135_Igf2	chr7	149721522	149723521	2000
chr8_87499950_87503039_Junb	chr8	87550494	87552493	2000
chr8_87499950_87503039_Junb	chr8	87560494	87562493	2000
chr4_133573556_133576678_Lin28a	chr4	135413117	135415116	2000
chr12_12946427_12949861_Mycn	chr12	12716144	12718143	2000
chr1_170359699_170361825_Pbx1	chr1	170312762	170314761	2000
chr11_70467133_70469959_Pfn1	chr11	68853546	68855545	2000
chr11_70467133_70469959_Pfn1	chr11	70051546	70053545	2000
chr4_22415669_22418516_Pou3f2	chr4	22761092	22763091	2000
chr4_22415669_22418516_Pou3f2	chr4	23526092	23528091	2000
chr10_44177241_44180107_Prdm1	chr10	44717674	44719673	2000
chr11_106116504_106117972_Psmc5	chr11	105153238	105155237	2000
chr11_98798642_98800671_Rara	chr11	98830656	98832655	2000
chr19_5636396_5639143_Rela	chr19	7339770	7341769	2000
chr4_154593802_154596613_Ski	chr4	154547208	154549207	2000
chr18_76399843_76403469_Smad2	chr18	77182656	77184655	2000
chr9_63867549_63870701_Smad6	chr9	64955125	64957124	2000
chr18_75525548_75529772_Smad7	chr18	75661660	75663659	2000
chr12_28025698_28028497_Sox11	chr12	27749098	27751097	2000
chr12_28025698_28028497_Sox11	chr12	28247098	28249097	2000
chr7_123174364_123178112_Sox6	chr7	123008238	123010237	2000
chr5_120282740_120286014_Tbx5	chr5	120884377	120886376	2000
chr7_133923872_133926827_Tbx6	chr7	134339350	134341349	2000
chr7_26471403_26474526_Tgfb1	chr7	28015964	28017963	2000
chr12_87417484_87420547_Tgfb3	chr12	87165016	87167015	2000
chr7_149626419_149629008_Tnni2	chr7	149712714	149714713	2000
chr15_85409954_85412945_Wnt7b	chr15	85289450	85291449	2000
chr12_110030583_110033282_Yy1	chr12	111184932	111186931	2000
chr18_5591240_5594740_Zeb1	chr18	5156990	5158989	2000
chr7_30879614_30880927_Zfp260	chr7	29765270	29767269	2000
chr5_139059130_139061688_Zfp68	chr5	138527409	138529408	2000
chr10_81022383_81023877_Aes	chr10	79389130	79390129	1000
chr15_80084611_80087550_Atf4	chr15	79662080	79663079	1000
chr15_80084611_80087550_Atf4	chr15	79914080	79915079	1000
chr17_26273981_26276763_Axin1	chr17	24616372	24617371	1000
chr2_18599399_18601713_Bmi1	chr2	17979556	17980555	1000
chr14_35314826_35317242_Bmpr1a	chr14	35269034	35270033	1000
chr3_141831177_141834320_Bmpr1b	chr3	141597748	141598747	1000
chr8_107693938_107696394_Cbfb	chr8	107750166	107751165	1000
chr16_15886577_15889028_Cebpd	chr16	16909802	16910801	1000
chr14_52862331_52865565_Chd8	chr14	51545948	51546947	1000
chr14_52862331_52865565_Chd8	chr14	51548948	51549947	1000
chr14_52862331_52865565_Chd8	chr14	51550948	51551947	1000
chr17_25269574_25272870_Clcn7	chr17	25322222	25323221	1000
chr11_94796731_94799690_Col1a1	chr11	94742210	94743209	1000
chr6_4455175_4458605_Col1a2	chr6	5327890	5328889	1000
chr15_97832813_97835758_Col2a1	chr15	96113286	96114285	1000
chr3_87751526_87754777_Crabp2	chr3	87779152	87780151	1000
chr3_87751526_87754777_Crabp2	chr3	87788152	87789151	1000
chr9_120841457_120844370_Ctnnb1	chr9	120599914	120600913	1000
chr10_126485191_126488182_Cyp27b1	chr10	128186686	128187685	1000
chr2_154394484_154397002_E2f1	chr2	154437743	154438742	1000
chr11_44429866_44432944_Ebf1	chr11	44711405	44712404	1000
chr18_35019556_35021798_Egr1	chr18	36077677	36078676	1000
chr4_118861479_118864330_Ermap	chr4	118108904	118109903	1000
chr16_28563097_28567135_Fgf12	chr16	27388116	27389115	1000
chr14_58689528_58694260_Fgf9	chr14	59819894	59820893	1000
chr5_34062714_34066174_Fgfr3	chr5	34045444	34046443	1000
chr5_109122901_109126214_Fgfrl1	chr5	110537558	110538557	1000
chr12_86812679_86816216_Fos	chr12	86713448	86714447	1000
chr12_86812679_86816216_Fos	chr12	86715448	86716447	1000
chr5_32434356_32436464_Fosl2	chr5	31827410	31828409	1000
chr5_4756129_4759451_Fzd1	chr5	4868790	4869789	1000
chr4_9769646_9772495_Gdf6	chr4	11081070	11082069	1000
chr10_126776500_126779948_Gli1	chr10	128001224	128002223	1000
chr10_126776500_126779948_Gli1	chr10	128003224	128004223	1000
chr13_15553739_15557248_Gli3	chr13	14132494	14133493	1000
chr12_105709730_105713337_Gsc	chr12	106269534	106270533	1000
chr2_74503399_74506910_Hoxd13	chr2	73612154	73613153	1000
chr2_74535540_74538148_Hoxd9	chr2	75909844	75910843	1000
chr7_148134123_148136461_Ifitm5	chr7	147245292	147246291	1000
chr7_149844910_149848135_Igf2	chr7	149640522	149641521	1000
chr15_38228931_38232336_Klf10	chr15	38447634	38448633	1000
chr10_45188881_45191794_Lin28b	chr10	45130338	45131337	1000
chr7_116312489_116314550_Lmo1	chr7	116581520	116582519	1000
chr7_116312489_116314550_Lmo1	chr7	116583520	116584519	1000
chr19_3684281_3686353_Lrp5	chr19	5294317	5295316	1000
chr6_134514703_134517662_Lrp6	chr6	134870182	134871181	1000
chr6_134514703_134517662_Lrp6	chr6	136504182	136505181	1000
chr3_29908469_29911947_Mecom	chr3	30500208	30501207	1000
chr11_18917640_18921970_Meis1	chr11	18783805	18784804	1000
chr19_6334758_6337042_Men1	chr19	7053900	7054899	1000
chr12_12946427_12949861_Mycn	chr12	12714144	12715143	1000
chr7_134353601_134355810_Mylpf	chr7	133951706	133952705	1000
chr10_127102912_127105995_Nab2	chr10	127530454	127531453	1000
chr14_56442510_56445943_Nfatc4	chr14	55515226	55516225	1000
chr2_147189990_147192235_Pax1	chr2	148700112	148701111	1000
chr4_139387763_139390860_Pax7	chr4	139376312	139377311	1000
chr11_70467133_70469959_Pfn1	chr11	69569546	69570545	1000
chr17_24685553_24689486_Pkd1	chr17	26267520	26268519	1000
chr4_22415669_22418516_Pou3f2	chr4	22764092	22765091	1000
chr1_42753399_42756355_Pou3f3	chr1	41443877	41444876	1000
chr1_42753399_42756355_Pou3f3	chr1	42311877	42312876	1000
chr2_30699700_30701855_Prrx2	chr2	30272778	30273777	1000
chr13_63665654_63670664_Ptch1	chr13	63915159	63916158	1000
chr4_116768060_116771262_Ptch2	chr4	116805661	116806660	1000
chr6_147209685_147213258_Pthlh	chr6	148160472	148161471	1000
chr11_98798642_98800671_Rara	chr11	98828656	98829655	1000
chr11_98798642_98800671_Rara	chr11	98882656	98883655	1000
chr11_98798642_98800671_Rara	chr11	100479656	100480655	1000
chr11_98821857_98823528_Rara	chr11	98831692	98832691	1000
chr11_98821857_98823528_Rara	chr11	100181692	100182691	1000
chr9_108207401_108210367_Rhoa	chr9	109955884	109956883	1000
chr2_51927686_51930368_Rif1	chr2	50993027	50994026	1000
chr4_134706877_134709942_Runx3	chr4	134480410	134481409	1000
chr3_115416570_115419596_S1pr1	chr3	115710083	115711082	1000
chr5_28790366_28793783_Shh	chr5	28489074	28490073	1000
chr5_28790366_28793783_Shh	chr5	30435074	30436073	1000
chr3_66784461_66787957_Shox2	chr3	66100209	66101208	1000
chr10_62800480_62802503_Sirt1	chr10	62488492	62489491	1000
chr4_154593802_154596613_Ski	chr4	154563208	154564207	1000
chr9_63867549_63870701_Smad6	chr9	64949125	64950124	1000
chr18_75525548_75529772_Smad7	chr18	75659660	75660659	1000
chr9_21420114_21421636_Smarca4	chr9	20756875	20757874	1000
chr9_21420114_21421636_Smarca4	chr9	21349875	21350874	1000
chr19_23346653_23348500_Smc5	chr19	21347576	21348575	1000
chr19_23346653_23348500_Smc5	chr19	21728576	21729575	1000
chr19_23346653_23348500_Smc5	chr19	21864576	21865575	1000
chr12_28025698_28028497_Sox11	chr12	27824098	27825097	1000
chr12_28025698_28028497_Sox11	chr12	28250098	28251097	1000
chr14_106295079_106298486_Spry2	chr14	105883782	105884781	1000
chr19_46470246_46472935_Sufu	chr19	46553590	46554589	1000
chr19_46470246_46472935_Sufu	chr19	46606590	46607589	1000
chr9_87624412_87627364_Tbx18	chr9	85641888	85642887	1000
chr7_133923872_133926827_Tbx6	chr7	133934350	133935349	1000
chr10_79894922_79897158_Tcf3	chr10	80141040	80142039	1000
chr6_72737065_72739646_Tcf7l1	chr6	72681356	72682355	1000
chr19_55815031_55819344_Tcf7l2	chr19	55463188	55464187	1000
chr8_13337175_13340621_Tfdp1	chr8	11552898	11553897	1000
chr7_26471403_26474526_Tgfb1	chr7	28376964	28377963	1000
chr5_107716267_107719381_Tgfbr3	chr5	107393824	107394823	1000
chr4_53837159_53839746_Tmem38b	chr4	55091452	55092451	1000
chr15_54108841_54111278_Tnfrsf11b	chr15	52794060	52795059	1000
chr14_32020383_32023474_Tnnc1	chr14	32454928	32455927	1000
chr14_32020383_32023474_Tnnc1	chr14	32972928	32973927	1000
chr7_149626419_149629008_Tnni2	chr7	149716714	149717713	1000
chr7_4464872_4466692_Tnnt1	chr7	3597782	3598781	1000
chr7_4464872_4466692_Tnnt1	chr7	5012782	5013781	1000
chr9_66894122_66897762_Tpm1	chr9	64955942	64956941	1000
chr16_25682462_25686020_Trp63	chr16	27390241	27391240	1000
chr15_98763803_98766015_Tuba1b	chr15	98783909	98784908	1000
chr17_25409415_25412199_Ube2i	chr17	25928807	25929806	1000
chr17_25409415_25412199_Ube2i	chr17	26056807	26057806	1000
chr13_89878065_89882877_Vcan	chr13	90229471	90230470	1000
chr13_89878065_89882877_Vcan	chr13	91513471	91514470	1000
chr3_104763632_104766963_Wnt2b	chr3	104667298	104668297	1000
chr12_110030583_110033282_Yy1	chr12	111182932	111183931	1000
chr9_48642043_48645207_Zbtb16	chr9	48483625	48484624	1000
chr9_48642043_48645207_Zbtb16	chr9	48485625	48486624	1000
chr8_90484546_90487815_Zfp423	chr8	90212180	90213179	1000
chr8_90484546_90487815_Zfp423	chr8	90238180	90239179	1000
chr8_90484546_90487815_Zfp423	chr8	90358180	90359179	1000
chr5_139059130_139061688_Zfp68	chr5	138718409	138719408	1000

## Sheet: FL_E11.5
viewpoint	chrom	start	end	width
chr1_164147278_164148832_Dnm3os	chr1	163927055	163958054	31000
chr7_149844910_149848135_Igf2	chr7	149721522	149744521	23000
chr2_18599399_18601713_Bmi1	chr2	17959556	17980555	21000
chr6_52195252_52198732_Hoxa11	chr6	51116992	51136991	20000
chr3_29908469_29911947_Mecom	chr3	30110208	30129207	19000
chr6_52211035_52213106_Hoxa13	chr6	51119070	51137069	18000
chr7_149626419_149629008_Tnni2	chr7	149724714	149741713	17000
chr3_29908469_29911947_Mecom	chr3	30401208	30417207	16000
chr1_164147278_164148832_Dnm3os	chr1	163905055	163918054	13000
chr5_120282740_120286014_Tbx5	chr5	120245377	120258376	13000
chr15_50719712_50722752_Trps1	chr15	51625232	51635231	10000
chr6_84534909_84538416_Cyp26b1	chr6	84049662	84058661	9000
chr2_74495971_74499159_Evx2	chr2	74103565	74112564	9000
chr19_55815031_55819344_Tcf7l2	chr19	55666188	55675187	9000
chr1_38682506_38686209_Aff3	chr1	38812358	38820357	8000
chr6_4455175_4458605_Col1a2	chr6	5337890	5345889	8000
chr6_84534909_84538416_Cyp26b1	chr6	84141662	84149661	8000
chr11_74982141_74984745_Hic1	chr11	74858443	74866442	8000
chr2_152561579_152563298_Id1	chr2	152528438	152536437	8000
chr8_87320883_87323459_Nfix	chr8	87261171	87269170	8000
chr4_154593802_154596613_Ski	chr4	154513208	154521207	8000
chr12_34641628_34643879_Twist1	chr12	34899754	34907753	8000
chr6_4455175_4458605_Col1a2	chr6	5328890	5335889	7000
chr1_164147278_164148832_Dnm3os	chr1	163970055	163977054	7000
chr6_52195252_52198732_Hoxa11	chr6	52172992	52179991	7000
chr6_52195252_52198732_Hoxa11	chr6	52913992	52920991	7000
chr6_52211035_52213106_Hoxa13	chr6	52799070	52806069	7000
chr2_74528796_74531118_Hoxd10	chr2	75794957	75801956	7000
chr3_29908469_29911947_Mecom	chr3	30000208	30007207	7000
chr14_56442510_56445943_Nfatc4	chr14	56469226	56476225	7000
chr18_69502950_69505851_Tcf4	chr18	69069400	69076399	7000
chr6_72737065_72739646_Tcf7l1	chr6	72602356	72609355	7000
chr6_72737065_72739646_Tcf7l1	chr6	72624356	72631355	7000
chr1_38682506_38686209_Aff3	chr1	38821358	38827357	6000
chr7_152123023_152126810_Ccnd1	chr7	152389916	152395915	6000
chr11_94796731_94799690_Col1a1	chr11	94740210	94746209	6000
chr1_164147278_164148832_Dnm3os	chr1	163981055	163987054	6000
chr1_164147278_164148832_Dnm3os	chr1	164231055	164237054	6000
chr1_77510639_77513124_Epha4	chr1	75765882	75771881	6000
chr1_77510639_77513124_Epha4	chr1	75826882	75832881	6000
chr2_74495971_74499159_Evx2	chr2	73909565	73915564	6000
chr8_59799231_59802712_Hand2	chr8	59805972	59811971	6000
chr10_119910594_119913110_Hmga2	chr10	120286852	120292851	6000
chr6_52195252_52198732_Hoxa11	chr6	51143992	51149991	6000
chr15_102795404_102798730_Hoxc10	chr15	103133067	103139066	6000
chr2_74503399_74506910_Hoxd13	chr2	73910154	73916153	6000
chr2_74535540_74538148_Hoxd9	chr2	75795844	75801843	6000
chr3_29908469_29911947_Mecom	chr3	30315208	30321207	6000
chr18_80907970_80911700_Nfatc1	chr18	80743835	80749834	6000
chr2_30699700_30701855_Prrx2	chr2	30688778	30694777	6000
chr11_98821857_98823528_Rara	chr11	98785692	98791691	6000
chr7_123174364_123178112_Sox6	chr7	122766238	122772237	6000
chr6_52662811_52665204_Tax1bp1	chr6	52200008	52206007	6000
chr5_120282740_120286014_Tbx5	chr5	120289377	120295376	6000
chr7_149626419_149629008_Tnni2	chr7	149664714	149670713	6000
chr15_50719712_50722752_Trps1	chr15	51332232	51338231	6000
chr18_14128669_14133943_Zfp521	chr18	13756306	13762305	6000
chr2_18599399_18601713_Bmi1	chr2	17947556	17952555	5000
chr7_152123023_152126810_Ccnd1	chr7	152363916	152368915	5000
chr15_97832813_97835758_Col2a1	chr15	97855286	97860285	5000
chr6_84534909_84538416_Cyp26b1	chr6	84080662	84085661	5000
chr1_164147278_164148832_Dnm3os	chr1	164056055	164061054	5000
chr11_44429866_44432944_Ebf1	chr11	45201405	45206404	5000
chr11_44429866_44432944_Ebf1	chr11	45361405	45366404	5000
chr1_77510639_77513124_Epha4	chr1	75835882	75840881	5000
chr2_74495971_74499159_Evx2	chr2	74025565	74030564	5000
chr10_119910594_119913110_Hmga2	chr10	119681852	119686851	5000
chr10_119910594_119913110_Hmga2	chr10	119706852	119711851	5000
chr6_52211035_52213106_Hoxa13	chr6	52787070	52792069	5000
chr6_52211035_52213106_Hoxa13	chr6	52809070	52814069	5000
chr15_102795404_102798730_Hoxc10	chr15	102838067	102843066	5000
chr15_102805257_102807929_Hoxc9	chr15	103133593	103138592	5000
chr2_74511740_74514909_Hoxd12	chr2	73910324	73915323	5000
chr2_74503399_74506910_Hoxd13	chr2	74046154	74051153	5000
chr2_74503399_74506910_Hoxd13	chr2	74107154	74112153	5000
chr2_74535540_74538148_Hoxd9	chr2	74521844	74526843	5000
chr7_75095274_75099424_Igf1r	chr7	75272349	75277348	5000
chr7_149844910_149848135_Igf2	chr7	149665522	149670521	5000
chr7_149844910_149848135_Igf2	chr7	149692522	149697521	5000
chr3_29908469_29911947_Mecom	chr3	30054208	30059207	5000
chr12_37833973_37836746_Meox2	chr12	37445360	37450359	5000
chr18_80907970_80911700_Nfatc1	chr18	80818835	80823834	5000
chr8_87320883_87323459_Nfix	chr8	87233171	87238170	5000
chr11_70467133_70469959_Pfn1	chr11	70480546	70485545	5000
chr1_165241834_165244894_Prrx1	chr1	165286364	165291363	5000
chr13_63665654_63670664_Ptch1	chr13	64017159	64022158	5000
chr4_154593802_154596613_Ski	chr4	154506208	154511207	5000
chr4_154593802_154596613_Ski	chr4	154547208	154552207	5000
chr9_63867549_63870701_Smad6	chr9	63805125	63810124	5000
chr9_21420114_21421636_Smarca4	chr9	21599875	21604874	5000
chr12_28025698_28028497_Sox11	chr12	27495098	27500097	5000
chr12_28025698_28028497_Sox11	chr12	27820098	27825097	5000
chr18_60782378_60785115_Synpo	chr18	60828746	60833745	5000
chr3_21973234_21977082_Tbl1xr1	chr3	21832158	21837157	5000
chr3_99058023_99061810_Tbx15	chr3	99732916	99737915	5000
chr11_85644477_85646356_Tbx2	chr11	85550416	85555415	5000
chr10_79894922_79897158_Tcf3	chr10	79859040	79864039	5000
chr18_69751407_69754269_Tcf4	chr18	69071838	69076837	5000
chr5_107716267_107719381_Tgfbr3	chr5	107577824	107582823	5000
chr7_149626419_149629008_Tnni2	chr7	149751714	149756713	5000
chr7_149626419_149629008_Tnni2	chr7	149779714	149784713	5000
chr10_120469988_120473103_Wif1	chr10	119681546	119686545	5000
chr14_29317453_29320874_Wnt5a	chr14	29912164	29917163	5000
chr8_44391769_44393212_Zfp42	chr8	46019490	46024489	5000
chr2_73728822_73731611_Atf2	chr2	74455216	74459215	4000
chr2_73728822_73731611_Atf2	chr2	74499216	74503215	4000
chr6_4455175_4458605_Col1a2	chr6	5057890	5061889	4000
chr9_120841457_120844370_Ctnnb1	chr9	120597914	120601913	4000
chr19_37771291_37773877_Cyp26a1	chr19	37979584	37983583	4000
chr6_6829460_6831986_Dlx5	chr6	6525723	6529722	4000
chr6_6813961_6817080_Dlx6	chr6	5975520	5979519	4000
chr1_164147278_164148832_Dnm3os	chr1	163919055	163923054	4000
chr1_164147278_164148832_Dnm3os	chr1	164114055	164118054	4000
chr1_164147278_164148832_Dnm3os	chr1	164241055	164245054	4000
chr11_44429866_44432944_Ebf1	chr11	44949405	44953404	4000
chr18_35019556_35021798_Egr1	chr18	35721677	35725676	4000
chr1_77510639_77513124_Epha4	chr1	75881882	75885881	4000
chr2_74495971_74499159_Evx2	chr2	74039565	74043564	4000
chr7_137406004_137410493_Fgfr2	chr7	136820248	136824247	4000
chr10_56096124_56099464_Gja1	chr10	56638794	56642793	4000
chr16_38087970_38092456_Gsk3b	chr16	37866213	37870212	4000
chr1_94072214_94075604_Hdac4	chr1	93857909	93861908	4000
chr10_119910594_119913110_Hmga2	chr10	119987852	119991851	4000
chr10_119910594_119913110_Hmga2	chr10	120307852	120311851	4000
chr6_52195252_52198732_Hoxa11	chr6	52786992	52790991	4000
chr15_102784024_102787175_Hoxc11	chr15	102838600	102842599	4000
chr2_74517642_74520443_Hoxd11	chr2	73365042	73369041	4000
chr2_74517642_74520443_Hoxd11	chr2	75798042	75802041	4000
chr2_74503399_74506910_Hoxd13	chr2	73365154	73369153	4000
chr2_74535540_74538148_Hoxd9	chr2	75258844	75262843	4000
chr2_74535540_74538148_Hoxd9	chr2	75538844	75542843	4000
chr2_74535540_74538148_Hoxd9	chr2	75905844	75909843	4000
chr12_25778545_25781441_Id2	chr12	26216993	26220992	4000
chr12_25778545_25781441_Id2	chr12	27077993	27081992	4000
chr10_87321504_87324810_Igf1	chr10	87506157	87510156	4000
chr7_75095274_75099424_Igf1r	chr7	74969349	74973348	4000
chr2_33493858_33498287_Lmx1b	chr2	33487072	33491071	4000
chr1_127807483_127809680_Lypd1	chr1	128896582	128900581	4000
chr12_37833973_37836746_Meox2	chr12	37517360	37521359	4000
chr14_31691416_31693844_Mustn1	chr14	31681630	31685629	4000
chr18_80907970_80911700_Nfatc1	chr18	80833835	80837834	4000
chr12_9580219_9583266_Osr1	chr12	10577742	10581741	4000
chr2_30699700_30701855_Prrx2	chr2	30323778	30327777	4000
chr11_98821857_98823528_Rara	chr11	98801692	98805691	4000
chr18_75525548_75529772_Smad7	chr18	75418660	75422659	4000
chr18_75525548_75529772_Smad7	chr18	75621660	75625659	4000
chr12_28025698_28028497_Sox11	chr12	27171098	27175097	4000
chr12_28025698_28028497_Sox11	chr12	28247098	28251097	4000
chr11_112641359_112646504_Sox9	chr11	111820932	111824931	4000
chr6_52662811_52665204_Tax1bp1	chr6	52215008	52219007	4000
chr3_99058023_99061810_Tbx15	chr3	99042916	99046915	4000
chr3_99058023_99061810_Tbx15	chr3	99466916	99470915	4000
chr9_87624412_87627364_Tbx18	chr9	87961888	87965887	4000
chr18_69502950_69505851_Tcf4	chr18	69355400	69359399	4000
chr6_72737065_72739646_Tcf7l1	chr6	72659356	72663355	4000
chr7_149626419_149629008_Tnni2	chr7	149715714	149719713	4000
chr1_93697637_93699620_Twist2	chr1	93494628	93498627	4000
chr17_46165116_46169966_Vegfa	chr17	45871541	45875540	4000
chr10_120469988_120473103_Wif1	chr10	119707546	119711545	4000
chr15_66721970_66723921_Wisp1	chr15	68087946	68091945	4000
chr14_29317453_29320874_Wnt5a	chr14	29784164	29788163	4000
chr8_90484546_90487815_Zfp423	chr8	90355180	90359179	4000
chr18_14128669_14133943_Zfp521	chr18	13296306	13300305	4000
chr2_73728822_73731611_Atf2	chr2	74521216	74524215	3000
chr15_80084611_80087550_Atf4	chr15	80629080	80632079	3000
chr7_152123023_152126810_Ccnd1	chr7	152343916	152346915	3000
chr16_15886577_15889028_Cebpd	chr16	14704802	14707801	3000
chr16_15886577_15889028_Cebpd	chr16	15293802	15296801	3000
chr17_25269574_25272870_Clcn7	chr17	27176222	27179221	3000
chr15_97832813_97835758_Col2a1	chr15	96114286	96117285	3000
chr15_97832813_97835758_Col2a1	chr15	96527286	96530285	3000
chr3_87751526_87754777_Crabp2	chr3	87762152	87765151	3000
chr7_140314221_140317388_Ctbp2	chr7	140826804	140829803	3000
chr9_120841457_120844370_Ctnnb1	chr9	120646914	120649913	3000
chr6_84534909_84538416_Cyp26b1	chr6	84093662	84096661	3000
chr6_6829460_6831986_Dlx5	chr6	5975723	5978722	3000
chr6_6813961_6817080_Dlx6	chr6	6526520	6529519	3000
chr1_164147278_164148832_Dnm3os	chr1	163964055	163967054	3000
chr1_164147278_164148832_Dnm3os	chr1	164007055	164010054	3000
chr1_164147278_164148832_Dnm3os	chr1	164062055	164065054	3000
chr13_30075516_30078226_E2f3	chr13	29038871	29041870	3000
chr11_44429866_44432944_Ebf1	chr11	45405405	45408404	3000
chr11_44429866_44432944_Ebf1	chr11	45694405	45697404	3000
chr18_35019556_35021798_Egr1	chr18	35089677	35092676	3000
chr18_35019556_35021798_Egr1	chr18	35757677	35760676	3000
chr10_66998706_67001124_Egr2	chr10	68994915	68997914	3000
chr2_74495971_74499159_Evx2	chr2	73789565	73792564	3000
chr11_33044944_33049171_Fgf18	chr11	32354058	32357057	3000
chr14_58689528_58694260_Fgf9	chr14	59819894	59822893	3000
chr12_86812679_86816216_Fos	chr12	86713448	86716447	3000
chr12_86812679_86816216_Fos	chr12	86796448	86799447	3000
chr12_86812679_86816216_Fos	chr12	88225448	88228447	3000
chr5_32434356_32436464_Fosl2	chr5	31828410	31831409	3000
chr18_9211622_9214739_Fzd8	chr18	7868180	7871179	3000
chr10_56096124_56099464_Gja1	chr10	56698794	56701793	3000
chr10_126776500_126779948_Gli1	chr10	127813224	127816223	3000
chr1_120948787_120951013_Gli2	chr1	120722900	120725899	3000
chr1_180252359_180254574_Gm16586	chr1	180264466	180267465	3000
chr8_59799231_59802712_Hand2	chr8	59791972	59794971	3000
chr10_119910594_119913110_Hmga2	chr10	120144852	120147851	3000
chr10_119910594_119913110_Hmga2	chr10	120156852	120159851	3000
chr10_119910594_119913110_Hmga2	chr10	120181852	120184851	3000
chr6_52195252_52198732_Hoxa11	chr6	50933992	50936991	3000
chr6_52195252_52198732_Hoxa11	chr6	51025992	51028991	3000
chr6_52195252_52198732_Hoxa11	chr6	52182992	52185991	3000
chr6_52195252_52198732_Hoxa11	chr6	52810992	52813991	3000
chr6_52195252_52198732_Hoxa11	chr6	52897992	52900991	3000
chr6_52195252_52198732_Hoxa11	chr6	52969992	52972991	3000
chr6_52211035_52213106_Hoxa13	chr6	50934070	50937069	3000
chr6_52211035_52213106_Hoxa13	chr6	52749070	52752069	3000
chr15_102795404_102798730_Hoxc10	chr15	102888067	102891066	3000
chr15_102848536_102851167_Hoxc4	chr15	102888852	102891851	3000
chr15_102805257_102807929_Hoxc9	chr15	102838593	102841592	3000
chr2_74528796_74531118_Hoxd10	chr2	74521957	74524956	3000
chr2_74528796_74531118_Hoxd10	chr2	75258957	75261956	3000
chr2_74517642_74520443_Hoxd11	chr2	73790042	73793041	3000
chr2_74517642_74520443_Hoxd11	chr2	73913042	73916041	3000
chr2_74511740_74514909_Hoxd12	chr2	73789324	73792323	3000
chr2_74511740_74514909_Hoxd12	chr2	75907324	75910323	3000
chr2_74503399_74506910_Hoxd13	chr2	73790154	73793153	3000
chr2_74535540_74538148_Hoxd9	chr2	75495844	75498843	3000
chr2_152561579_152563298_Id1	chr2	152654438	152657437	3000
chr7_149844910_149848135_Igf2	chr7	149641522	149644521	3000
chr7_149844910_149848135_Igf2	chr7	149711522	149714521	3000
chr10_119638151_119640580_Irak3	chr10	120308366	120311365	3000
chr15_38228931_38232336_Klf10	chr15	36981634	36984633	3000
chr17_23881797_23884110_Kremen2	chr17	23963954	23966953	3000
chr3_130812216_130815371_Lef1	chr3	130430794	130433793	3000
chr4_118905023_118907974_Lepre1	chr4	120712498	120715497	3000
chr7_116312489_116314550_Lmo1	chr7	114833520	114836519	3000
chr2_33493858_33498287_Lmx1b	chr2	33571072	33574071	3000
chr19_3684281_3686353_Lrp5	chr19	3641317	3644316	3000
chr6_134514703_134517662_Lrp6	chr6	134877182	134880181	3000
chr3_29908469_29911947_Mecom	chr3	30143208	30146207	3000
chr10_127102912_127105995_Nab2	chr10	127495454	127498453	3000
chr8_109816757_109819476_Nfat5	chr8	108147116	108150115	3000
chr11_78508970_78512346_Nlk	chr11	80196658	80199657	3000
chr11_89161142_89163664_Nog	chr11	87548403	87551402	3000
chr17_21080536_21083642_Ppp2r1a	chr17	21669089	21672088	3000
chr9_86635700_86638434_Prss35	chr9	85641067	85644066	3000
chr11_106116504_106117972_Psmc5	chr11	106076238	106079237	3000
chr12_74144893_74148226_Six1	chr12	74440560	74443559	3000
chr4_154593802_154596613_Ski	chr4	154495208	154498207	3000
chr18_76399843_76403469_Smad2	chr18	77181656	77184655	3000
chr9_63604233_63607322_Smad3	chr9	62672778	62675777	3000
chr9_63867549_63870701_Smad6	chr9	63828125	63831124	3000
chr9_63867549_63870701_Smad6	chr9	63904125	63907124	3000
chr18_75525548_75529772_Smad7	chr18	75366660	75369659	3000
chr12_28025698_28028497_Sox11	chr12	27217098	27220097	3000
chr12_28025698_28028497_Sox11	chr12	28150098	28153097	3000
chr7_123174364_123178112_Sox6	chr7	122740238	122743237	3000
chr7_123174364_123178112_Sox6	chr7	122788238	122791237	3000
chr11_96878986_96880992_Sp6	chr11	96836989	96839988	3000
chr15_102195697_102197757_Sp7	chr15	102184727	102187726	3000
chr14_106295079_106298486_Spry2	chr14	106130782	106133781	3000
chr18_60782378_60785115_Synpo	chr18	60804746	60807745	3000
chr11_85644477_85646356_Tbx2	chr11	85652416	85655415	3000
chr18_69502950_69505851_Tcf4	chr18	68869400	68872399	3000
chr18_69751407_69754269_Tcf4	chr18	68868838	68871837	3000
chr2_172375912_172378889_Tfap2c	chr2	172759400	172762399	3000
chr13_56710029_56712867_Tgfbi	chr13	56674448	56677447	3000
chr13_56710029_56712867_Tgfbi	chr13	56684448	56687447	3000
chr13_56710029_56712867_Tgfbi	chr13	56700448	56703447	3000
chr4_63706260_63709304_Tnc	chr4	63061782	63064781	3000
chr14_32020383_32023474_Tnnc1	chr14	32062928	32065927	3000
chr7_149626419_149629008_Tnni2	chr7	149762714	149765713	3000
chr7_4464872_4466692_Tnnt1	chr7	3579782	3582781	3000
chr7_4464872_4466692_Tnnt1	chr7	3595782	3598781	3000
chr9_66894122_66897762_Tpm1	chr9	66982942	66985941	3000
chr9_66894122_66897762_Tpm1	chr9	67026942	67029941	3000
chr4_43534335_43537745_Tpm2	chr4	43572040	43575039	3000
chr15_98763803_98766015_Tuba1b	chr15	98699909	98702908	3000
chr1_93697637_93699620_Twist2	chr1	93505628	93508627	3000
chr13_89878065_89882877_Vcan	chr13	91598471	91601470	3000
chr10_38882360_38884604_Wisp3	chr10	39252482	39255481	3000
chr10_38882360_38884604_Wisp3	chr10	39377482	39380481	3000
chr6_83864154_83865978_Zfml	chr6	85400066	85403065	3000
chr7_30879614_30880927_Zfp260	chr7	29154270	29157269	3000
chr7_30879614_30880927_Zfp260	chr7	29161270	29164269	3000
chr8_44391769_44393212_Zfp42	chr8	42632490	42635489	3000
chr15_101004077_101006768_Acvr1b	chr15	99174422	99176421	2000
chr15_101004077_101006768_Acvr1b	chr15	99647422	99649421	2000
chr15_101004077_101006768_Acvr1b	chr15	100058422	100060421	2000
chr10_81022383_81023877_Aes	chr10	81068130	81070129	2000
chr1_38682506_38686209_Aff3	chr1	38569358	38571357	2000
chr2_73728822_73731611_Atf2	chr2	74493216	74495215	2000
chr2_73728822_73731611_Atf2	chr2	74515216	74517215	2000
chr15_80084611_80087550_Atf4	chr15	80539080	80541079	2000
chr2_18599399_18601713_Bmi1	chr2	17985556	17987555	2000
chr9_75622085_75625629_Bmp5	chr9	75883857	75885856	2000
chr2_172763233_172766213_Bmp7	chr2	172671723	172673722	2000
chr2_172763233_172766213_Bmp7	chr2	174683723	174685722	2000
chr18_46886623_46889064_Cdo1	chr18	46755844	46757843	2000
chr16_15886577_15889028_Cebpd	chr16	15054802	15056801	2000
chr17_25269574_25272870_Clcn7	chr17	25320222	25322221	2000
chr8_72895934_72899081_Comp	chr8	73061508	73063507	2000
chr7_127343082_127346365_Crym	chr7	127269724	127271723	2000
chr6_117117047_117119951_Cxcl12	chr6	117856499	117858498	2000
chr6_84534909_84538416_Cyp26b1	chr6	84180662	84182661	2000
chr19_37758209_37760884_Cyp26c1	chr19	37979546	37981545	2000
chr10_126485191_126488182_Cyp27b1	chr10	126368686	126370685	2000
chr10_96940927_96943536_Dcn	chr10	98761232	98763231	2000
chr2_71383014_71385729_Dlx2	chr2	69659372	69661371	2000
chr1_164147278_164148832_Dnm3os	chr1	164251055	164253054	2000
chr16_20516628_20519070_Dvl3	chr16	21339849	21341848	2000
chr11_44429866_44432944_Ebf1	chr11	46027405	46029404	2000
chr14_67851751_67855038_Ebf2	chr14	67996394	67998393	2000
chr18_35019556_35021798_Egr1	chr18	35713677	35715676	2000
chr14_79880050_79882900_Elf1	chr14	79987475	79989474	2000
chr1_77510639_77513124_Epha4	chr1	75782882	75784881	2000
chr1_77510639_77513124_Epha4	chr1	76892882	76894881	2000
chr2_74495971_74499159_Evx2	chr2	74048565	74050564	2000
chr1_14297789_14300826_Eya1	chr1	13849308	13851307	2000
chr16_28443899_28448279_Fgf12	chr16	27390089	27392088	2000
chr11_33044944_33049171_Fgf18	chr11	32540058	32542057	2000
chr7_152046111_152048940_Fgf4	chr7	150309526	150311525	2000
chr8_26628987_26631865_Fgfr1	chr8	26654426	26656425	2000
chr1_135933360_135936925_Fmod	chr1	135639142	135641141	2000
chr12_86812679_86816216_Fos	chr12	88166448	88168447	2000
chr19_5447409_5449287_Fosl1	chr19	5487348	5489347	2000
chr5_4756129_4759451_Fzd1	chr5	4485790	4487789	2000
chr18_9211622_9214739_Fzd8	chr18	8327180	8329179	2000
chr1_120948787_120951013_Gli2	chr1	120719900	120721899	2000
chr1_180252359_180254574_Gm16586	chr1	181075466	181077465	2000
chr1_165332110_165335732_Gorab	chr1	165588921	165590920	2000
chr1_165332110_165335732_Gorab	chr1	165773921	165775920	2000
chr12_105709730_105713337_Gsc	chr12	106051534	106053533	2000
chr16_38087970_38092456_Gsk3b	chr16	37788213	37790212	2000
chr1_94072214_94075604_Hdac4	chr1	93498909	93500908	2000
chr11_74982141_74984745_Hic1	chr11	74643443	74645442	2000
chr6_52211035_52213106_Hoxa13	chr6	51144070	51146069	2000
chr6_52211035_52213106_Hoxa13	chr6	51147070	51149069	2000
chr6_52211035_52213106_Hoxa13	chr6	52261070	52263069	2000
chr6_52211035_52213106_Hoxa13	chr6	52743070	52745069	2000
chr6_52211035_52213106_Hoxa13	chr6	52876070	52878069	2000
chr6_52211035_52213106_Hoxa13	chr6	52897070	52899069	2000
chr6_52211035_52213106_Hoxa13	chr6	52901070	52903069	2000
chr6_52211035_52213106_Hoxa13	chr6	52919070	52921069	2000
chr15_102795404_102798730_Hoxc10	chr15	103130067	103132066	2000
chr15_102784024_102787175_Hoxc11	chr15	102830600	102832599	2000
chr15_102784024_102787175_Hoxc11	chr15	102888600	102890599	2000
chr2_74528796_74531118_Hoxd10	chr2	73909957	73911956	2000
chr2_74528796_74531118_Hoxd10	chr2	75495957	75497956	2000
chr2_74528796_74531118_Hoxd10	chr2	75540957	75542956	2000
chr2_74517642_74520443_Hoxd11	chr2	73358042	73360041	2000
chr2_74517642_74520443_Hoxd11	chr2	74524042	74526041	2000
chr2_74511740_74514909_Hoxd12	chr2	74054324	74056323	2000
chr2_74511740_74514909_Hoxd12	chr2	74524324	74526323	2000
chr2_74503399_74506910_Hoxd13	chr2	73384154	73386153	2000
chr2_74503399_74506910_Hoxd13	chr2	74028154	74030153	2000
chr2_74503399_74506910_Hoxd13	chr2	74490154	74492153	2000
chr2_74535540_74538148_Hoxd9	chr2	75046844	75048843	2000
chr12_25778545_25781441_Id2	chr12	27097993	27099992	2000
chr4_135698434_135701733_Id3	chr4	135607084	135609083	2000
chr7_148134123_148136461_Ifitm5	chr7	149764292	149766291	2000
chr7_75095274_75099424_Igf1r	chr7	75448349	75450348	2000
chr17_12958114_12962181_Igf2r	chr17	12606148	12608147	2000
chr2_33493858_33498287_Lmx1b	chr2	33501072	33503071	2000
chr3_29908469_29911947_Mecom	chr3	30183208	30185207	2000
chr12_37833973_37836746_Meox2	chr12	36882360	36884359	2000
chr12_12946427_12949861_Mycn	chr12	12586144	12588143	2000
chr11_104410121_104412681_Myl4	chr11	105041401	105043400	2000
chr7_134353601_134355810_Mylpf	chr7	134374706	134376705	2000
chr18_80907970_80911700_Nfatc1	chr18	80826835	80828834	2000
chr2_168424925_168427771_Nfatc2	chr2	168030348	168032347	2000
chr8_87320883_87323459_Nfix	chr8	87247171	87249170	2000
chr3_135351946_135355572_Nfkb1	chr3	133899759	133901758	2000
chr17_28369475_28373816_Ppard	chr17	28382646	28384645	2000
chr17_28369475_28373816_Ppard	chr17	28393646	28395645	2000
chr17_28369475_28373816_Ppard	chr17	28463646	28465645	2000
chr1_165241834_165244894_Prrx1	chr1	165504364	165506363	2000
chr2_30699700_30701855_Prrx2	chr2	30684778	30686777	2000
chr11_106116504_106117972_Psmc5	chr11	105144238	105146237	2000
chr11_106116504_106117972_Psmc5	chr11	105152238	105154237	2000
chr11_106116504_106117972_Psmc5	chr11	106134238	106136237	2000
chr13_63665654_63670664_Ptch1	chr13	64335159	64337158	2000
chr11_98798642_98800671_Rara	chr11	98993656	98995655	2000
chr14_73724127_73727004_Rb1	chr14	73542566	73544565	2000
chr2_157028826_157031627_Rbl1	chr2	157393226	157395225	2000
chr11_29447027_29448915_Rps27a	chr11	29071971	29073970	2000
chr3_115416570_115419596_S1pr1	chr3	115709083	115711082	2000
chr3_66784461_66787957_Shox2	chr3	66776209	66778208	2000
chr3_66784461_66787957_Shox2	chr3	66779209	66781208	2000
chr4_154593802_154596613_Ski	chr4	154606208	154608207	2000
chr9_21420114_21421636_Smarca4	chr9	20755875	20757874	2000
chr2_72814956_72817313_Sp3	chr2	72315134	72317133	2000
chr2_72814956_72817313_Sp3	chr2	72769134	72771133	2000
chr18_38759268_38762685_Spry4	chr18	38791976	38793975	2000
chr11_50023598_50024962_Sqstm1	chr11	48614280	48616279	2000
chr2_69699429_69701481_Ssb	chr2	69660455	69662454	2000
chr11_100799145_100801066_Stat3	chr11	102740106	102742105	2000
chr6_52662811_52665204_Tax1bp1	chr6	51134008	51136007	2000
chr9_87624412_87627364_Tbx18	chr9	88415888	88417887	2000
chr11_85644477_85646356_Tbx2	chr11	85444416	85446415	2000
chr7_133923872_133926827_Tbx6	chr7	133934350	133936349	2000
chr18_69502950_69505851_Tcf4	chr18	69954400	69956399	2000
chr19_55815031_55819344_Tcf7l2	chr19	55599188	55601187	2000
chr8_13337175_13340621_Tfdp1	chr8	11554898	11556897	2000
chr7_26471403_26474526_Tgfb1	chr7	26536964	26538963	2000
chr12_87417484_87420547_Tgfb3	chr12	87364016	87366015	2000
chr7_149626419_149629008_Tnni2	chr7	149673714	149675713	2000
chr7_149626419_149629008_Tnni2	chr7	149712714	149714713	2000
chr7_4464872_4466692_Tnnt1	chr7	3287782	3289781	2000
chr7_4464872_4466692_Tnnt1	chr7	3645782	3647781	2000
chr9_66894122_66897762_Tpm1	chr9	66963942	66965941	2000
chr16_25800021_25803355_Trp63	chr16	25465688	25467687	2000
chr15_98763803_98766015_Tuba1b	chr15	98821909	98823908	2000
chr13_89878065_89882877_Vcan	chr13	90228471	90230470	2000
chr3_104763632_104766963_Wnt2b	chr3	104592298	104594297	2000
chr14_29317453_29320874_Wnt5a	chr14	29925164	29927163	2000
chr12_110030583_110033282_Yy1	chr12	110753932	110755931	2000
chr8_90484546_90487815_Zfp423	chr8	90346180	90348179	2000
chr5_139059130_139061688_Zfp68	chr5	139728409	139730408	2000
chr10_81022383_81023877_Aes	chr10	82321130	82322129	1000
chr14_78935084_78938166_Akap11	chr14	77209625	77210624	1000
chr14_78935084_78938166_Akap11	chr14	79788625	79789624	1000
chr9_71062568_71065630_Aldh1a2	chr9	71332099	71333098	1000
chr2_73728822_73731611_Atf2	chr2	74508216	74509215	1000
chr17_26273981_26276763_Axin1	chr17	26391372	26392371	1000
chr17_26273981_26276763_Axin1	chr17	28046372	28047371	1000
chr11_108782265_108784541_Axin2	chr11	108751403	108752402	1000
chr16_19759451_19762171_B3gnt5	chr16	21206811	21207810	1000
chr2_18599399_18601713_Bmi1	chr2	17981556	17982555	1000
chr7_35902387_35905796_Cebpa	chr7	35172092	35173091	1000
chr16_15886577_15889028_Cebpd	chr16	14158802	14159801	1000
chr16_15886577_15889028_Cebpd	chr16	14161802	14162801	1000
chr16_15886577_15889028_Cebpd	chr16	15086802	15087801	1000
chr14_52862331_52865565_Chd8	chr14	52637948	52638947	1000
chr16_20731852_20734764_Chrd	chr16	21338308	21339307	1000
chr1_89101824_89104059_Chrng	chr1	88330942	88331941	1000
chr1_89101824_89104059_Chrng	chr1	88332942	88333941	1000
chr15_97832813_97835758_Col2a1	chr15	96542286	96543285	1000
chr15_97832813_97835758_Col2a1	chr15	96830286	96831285	1000
chr8_72895934_72899081_Comp	chr8	73016508	73017507	1000
chr9_54611791_54613863_Crabp1	chr9	54647827	54648826	1000
chr9_54611791_54613863_Crabp1	chr9	56007827	56008826	1000
chr7_140205030_140208448_Ctbp2	chr7	140826739	140827738	1000
chr9_120841457_120844370_Ctnnb1	chr9	120678914	120679913	1000
chr6_84534909_84538416_Cyp26b1	chr6	84091662	84092661	1000
chr6_84534909_84538416_Cyp26b1	chr6	84160662	84161661	1000
chr10_126485191_126488182_Cyp27b1	chr10	126365686	126366685	1000
chr2_71383014_71385729_Dlx2	chr2	72315372	72316371	1000
chr11_94981343_94983475_Dlx3	chr11	96212409	96213408	1000
chr1_164147278_164148832_Dnm3os	chr1	163900055	163901054	1000
chr11_44429866_44432944_Ebf1	chr11	45409405	45410404	1000
chr11_44429866_44432944_Ebf1	chr11	46025405	46026404	1000
chr14_67851751_67855038_Ebf2	chr14	67926394	67927393	1000
chr14_67851751_67855038_Ebf2	chr14	68332394	68333393	1000
chr1_77510639_77513124_Epha4	chr1	76890882	76891881	1000
chr2_139995542_139998524_Esf1	chr2	139433033	139434032	1000
chr2_139995542_139998524_Esf1	chr2	139436033	139437032	1000
chr11_101645045_101647836_Etv4	chr11	102784440	102785439	1000
chr2_74495971_74499159_Evx2	chr2	73384565	73385564	1000
chr1_14297789_14300826_Eya1	chr1	12684308	12685307	1000
chr13_119501869_119505236_Fgf10	chr13	117813552	117814551	1000
chr16_28443899_28448279_Fgf12	chr16	27388089	27389088	1000
chr16_28751284_28754891_Fgf12	chr16	27388088	27389087	1000
chr19_45816056_45818653_Fgf8	chr19	44321354	44322353	1000
chr8_26628987_26631865_Fgfr1	chr8	26657426	26658425	1000
chr5_34062714_34066174_Fgfr3	chr5	34033444	34034443	1000
chr5_34062714_34066174_Fgfr3	chr5	34037444	34038443	1000
chrX_71489949_71492440_Flna	chrX	70712194	70713193	1000
chr14_73108094_73111002_Fndc3a	chr14	71164548	71165547	1000
chr14_73108094_73111002_Fndc3a	chr14	73001548	73002547	1000
chr19_5447409_5449287_Fosl1	chr19	5475348	5476347	1000
chr5_4756129_4759451_Fzd1	chr5	4482790	4483789	1000
chr10_56096124_56099464_Gja1	chr10	56258794	56259793	1000
chr10_56096124_56099464_Gja1	chr10	56610794	56611793	1000
chr10_126776500_126779948_Gli1	chr10	127521224	127522223	1000
chr13_15553739_15557248_Gli3	chr13	15435494	15436493	1000
chr8_59799231_59802712_Hand2	chr8	59029972	59030971	1000
chr8_59799231_59802712_Hand2	chr8	59814972	59815971	1000
chr8_59799231_59802712_Hand2	chr8	59816972	59817971	1000
chr11_74982141_74984745_Hic1	chr11	74888443	74889442	1000
chr10_119910594_119913110_Hmga2	chr10	120293852	120294851	1000
chr6_52195252_52198732_Hoxa11	chr6	50927992	50928991	1000
chr6_52195252_52198732_Hoxa11	chr6	52201992	52202991	1000
chr6_52195252_52198732_Hoxa11	chr6	52799992	52800991	1000
chr6_52195252_52198732_Hoxa11	chr6	52808992	52809991	1000
chr6_52195252_52198732_Hoxa11	chr6	52967992	52968991	1000
chr6_52211035_52213106_Hoxa13	chr6	52913070	52914069	1000
chr15_102805257_102807929_Hoxc9	chr15	102889593	102890592	1000
chr15_102805257_102807929_Hoxc9	chr15	103126593	103127592	1000
chr2_74528796_74531118_Hoxd10	chr2	73364957	73365956	1000
chr2_74528796_74531118_Hoxd10	chr2	73367957	73368956	1000
chr2_74528796_74531118_Hoxd10	chr2	73789957	73790956	1000
chr2_74528796_74531118_Hoxd10	chr2	73912957	73913956	1000
chr2_74528796_74531118_Hoxd10	chr2	75047957	75048956	1000
chr2_74528796_74531118_Hoxd10	chr2	75543957	75544956	1000
chr2_74528796_74531118_Hoxd10	chr2	75828957	75829956	1000
chr2_74517642_74520443_Hoxd11	chr2	73290042	73291041	1000
chr2_74511740_74514909_Hoxd12	chr2	73359324	73360323	1000
chr2_74511740_74514909_Hoxd12	chr2	73364324	73365323	1000
chr2_74511740_74514909_Hoxd12	chr2	74047324	74048323	1000
chr2_74511740_74514909_Hoxd12	chr2	74109324	74110323	1000
chr2_74511740_74514909_Hoxd12	chr2	75826324	75827323	1000
chr2_74503399_74506910_Hoxd13	chr2	74493154	74494153	1000
chr2_74535540_74538148_Hoxd9	chr2	75276844	75277843	1000
chr2_74535540_74538148_Hoxd9	chr2	75828844	75829843	1000
chr2_74535540_74538148_Hoxd9	chr2	75897844	75898843	1000
chr4_135698434_135701733_Id3	chr4	135705084	135706083	1000
chr7_75095274_75099424_Igf1r	chr7	75408349	75409348	1000
chr7_149844910_149848135_Igf2	chr7	148653522	148654521	1000
chr7_149844910_149848135_Igf2	chr7	149716522	149717521	1000
chr7_149844910_149848135_Igf2	chr7	149719522	149720521	1000
chr7_149844910_149848135_Igf2	chr7	149782522	149783521	1000
chr17_12958114_12962181_Igf2r	chr17	12918148	12919147	1000
chr4_56813939_56817328_Ikbkap	chr4	54963634	54964633	1000
chr13_16102561_16105504_Inhba	chr13	17895032	17896031	1000
chr1_194978901_194980831_Irf6	chr1	193395866	193396865	1000
chr15_38228931_38232336_Klf10	chr15	38447634	38448633	1000
chr15_38228931_38232336_Klf10	chr15	39773634	39774633	1000
chr19_45308187_45310704_Lbx1	chr19	43458446	43459445	1000
chr1_182863507_182865888_Lefty1	chr1	181029698	181030697	1000
chr2_33493858_33498287_Lmx1b	chr2	33560072	33561071	1000
chr2_33493858_33498287_Lmx1b	chr2	33569072	33570071	1000
chr2_33493858_33498287_Lmx1b	chr2	33575072	33576071	1000
chr2_91296389_91299367_Lrp4	chr2	91041878	91042877	1000
chr2_91296389_91299367_Lrp4	chr2	91105878	91106877	1000
chr19_3684281_3686353_Lrp5	chr19	3639317	3640316	1000
chr19_3684281_3686353_Lrp5	chr19	3766317	3767316	1000
chr2_164228390_164231595_Matn4	chr2	163961992	163962991	1000
chr2_164228390_164231595_Matn4	chr2	163973992	163974991	1000
chr3_29908469_29911947_Mecom	chr3	29982208	29983207	1000
chr19_6334758_6337042_Men1	chr19	6983900	6984899	1000
chr7_142906276_142909505_Mki67	chr7	144501890	144502889	1000
chr5_38213280_38216792_Msx1	chr5	38359036	38360035	1000
chr12_12946427_12949861_Mycn	chr12	13181144	13182143	1000
chr12_12946427_12949861_Mycn	chr12	13183144	13184143	1000
chr12_12946427_12949861_Mycn	chr12	13187144	13188143	1000
chr12_12946427_12949861_Mycn	chr12	13191144	13192143	1000
chr2_155297867_155299083_Ncoa6	chr2	156005475	156006474	1000
chr2_155297867_155299083_Ncoa6	chr2	156665475	156666474	1000
chr18_80907970_80911700_Nfatc1	chr18	80762835	80763834	1000
chr14_56442510_56445943_Nfatc4	chr14	55501226	55502225	1000
chr8_87320883_87323459_Nfix	chr8	87270171	87271170	1000
chr3_135351946_135355572_Nfkb1	chr3	135101759	135102758	1000
chr11_70467133_70469959_Pfn1	chr11	68902546	68903545	1000
chr11_70467133_70469959_Pfn1	chr11	69733546	69734545	1000
chr17_24685553_24689486_Pkd1	chr17	24777520	24778519	1000
chr10_12809571_12811281_Plagl1	chr10	13041426	13042425	1000
chr10_12809571_12811281_Plagl1	chr10	13043426	13044425	1000
chr18_66617142_66619414_Pmaip1	chr18	65679278	65680277	1000
chr11_51910567_51914502_Ppp2ca	chr11	53113534	53114533	1000
chr1_165241834_165244894_Prrx1	chr1	165589364	165590363	1000
chr1_165241834_165244894_Prrx1	chr1	165773364	165774363	1000
chr1_165241834_165244894_Prrx1	chr1	165783364	165784363	1000
chr13_63665654_63670664_Ptch1	chr13	63533159	63534158	1000
chr13_63665654_63670664_Ptch1	chr13	63915159	63916158	1000
chr13_63665654_63670664_Ptch1	chr13	63917159	63918158	1000
chr11_98798642_98800671_Rara	chr11	98825656	98826655	1000
chr11_98798642_98800671_Rara	chr11	98884656	98885655	1000
chr11_98798642_98800671_Rara	chr11	98930656	98931655	1000
chr11_98798642_98800671_Rara	chr11	99006656	99007655	1000
chr19_5636396_5639143_Rela	chr19	5487770	5488769	1000
chr19_5636396_5639143_Rela	chr19	5489770	5490769	1000
chr19_5636396_5639143_Rela	chr19	5608770	5609769	1000
chr9_108207401_108210367_Rhoa	chr9	108418884	108419883	1000
chr12_110837272_110841113_Rtl1	chr12	110676192	110677191	1000
chr4_134706877_134709942_Runx3	chr4	134480410	134481409	1000
chr3_115416570_115419596_S1pr1	chr3	113733083	113734082	1000
chr8_91564336_91569242_Sall1	chr8	91558789	91559788	1000
chr8_91564336_91569242_Sall1	chr8	92180789	92181788	1000
chr2_168590196_168593796_Sall4	chr2	170044996	170045995	1000
chr15_76286959_76290006_Scx	chr15	76295482	76296481	1000
chr3_66784461_66787957_Shox2	chr3	66179209	66180208	1000
chr8_81920191_81923739_Smad1	chr8	80041965	80042964	1000
chr18_76399843_76403469_Smad2	chr18	75365656	75366655	1000
chr13_56803701_56807459_Smad5	chr13	58228580	58229579	1000
chr6_144155558_144157976_Sox5	chr6	143447767	143448766	1000
chr6_144155558_144157976_Sox5	chr6	143480767	143481766	1000
chr6_144729196_144732774_Sox5	chr6	143479985	143480984	1000
chr11_112641359_112646504_Sox9	chr11	112273932	112274931	1000
chr15_102236459_102240226_Sp1	chr15	102185342	102186341	1000
chr15_102236459_102240226_Sp1	chr15	102187342	102188341	1000
chr15_102236459_102240226_Sp1	chr15	102206342	102207341	1000
chr15_102195697_102197757_Sp7	chr15	102206727	102207726	1000
chr14_106295079_106298486_Spry2	chr14	105727782	105728781	1000
chr18_38759268_38762685_Spry4	chr18	38789976	38790975	1000
chr17_8625006_8627725_T	chr17	10525366	10526365	1000
chr6_52662811_52665204_Tax1bp1	chr6	52184008	52185007	1000
chr6_52662811_52665204_Tax1bp1	chr6	52186008	52187007	1000
chr6_52662811_52665204_Tax1bp1	chr6	52192008	52193007	1000
chr6_52662811_52665204_Tax1bp1	chr6	52208008	52209007	1000
chr6_52662811_52665204_Tax1bp1	chr6	52224008	52225007	1000
chr9_87624412_87627364_Tbx18	chr9	87878888	87879887	1000
chr11_85644477_85646356_Tbx2	chr11	85527416	85528415	1000
chr11_85644477_85646356_Tbx2	chr11	86383416	86384415	1000
chr11_85644477_85646356_Tbx2	chr11	86385416	86386415	1000
chr11_85702310_85705082_Tbx4	chr11	85756696	85757695	1000
chr7_133923872_133926827_Tbx6	chr7	134163350	134164349	1000
chr10_79894922_79897158_Tcf3	chr10	80140040	80141039	1000
chr10_79894922_79897158_Tcf3	chr10	80640040	80641039	1000
chr18_69502950_69505851_Tcf4	chr18	69273400	69274399	1000
chr18_69502950_69505851_Tcf4	chr18	69952400	69953399	1000
chr18_69751407_69754269_Tcf4	chr18	69512838	69513837	1000
chr18_69751407_69754269_Tcf4	chr18	69952838	69953837	1000
chr6_72737065_72739646_Tcf7l1	chr6	72669356	72670355	1000
chr19_55815031_55819344_Tcf7l2	chr19	56178188	56179187	1000
chr1_19197687_19200253_Tfap2b	chr1	19204970	19205969	1000
chr7_26471403_26474526_Tgfb1	chr7	25293964	25294963	1000
chr1_188527809_188530190_Tgfb2	chr1	188330000	188330999	1000
chr13_56710029_56712867_Tgfbi	chr13	56698448	56699447	1000
chr4_63706260_63709304_Tnc	chr4	63096782	63097781	1000
chr14_78705549_78708094_Tnfsf11	chr14	77209822	77210821	1000
chr14_32020383_32023474_Tnnc1	chr14	32248928	32249927	1000
chr7_149626419_149629008_Tnni2	chr7	149505714	149506713	1000
chr7_149626419_149629008_Tnni2	chr7	149640714	149641713	1000
chr7_149626419_149629008_Tnni2	chr7	149742714	149743713	1000
chr7_4464872_4466692_Tnnt1	chr7	3656782	3657781	1000
chr7_4464872_4466692_Tnnt1	chr7	4114782	4115781	1000
chr4_43534335_43537745_Tpm2	chr4	45504040	45505039	1000
chr15_50719712_50722752_Trps1	chr15	50524232	50525231	1000
chr15_50719712_50722752_Trps1	chr15	50527232	50528231	1000
chr15_50719712_50722752_Trps1	chr15	50530232	50531231	1000
chr15_50719712_50722752_Trps1	chr15	51554232	51555231	1000
chr15_50719712_50722752_Trps1	chr15	51667232	51668231	1000
chr15_98763803_98766015_Tuba1b	chr15	98814909	98815908	1000
chr15_98763803_98766015_Tuba1b	chr15	98819909	98820908	1000
chr12_34641628_34643879_Twist1	chr12	34897754	34898753	1000
chr1_93697637_93699620_Twist2	chr1	93499628	93500627	1000
chr17_46165116_46169966_Vegfa	chr17	45710541	45711540	1000
chr7_105983038_105985614_Wnt11	chr7	105803326	105804325	1000
chr7_105983038_105985614_Wnt11	chr7	105818326	105819325	1000
chr3_104763632_104766963_Wnt2b	chr3	105760298	105761297	1000
chr3_104763632_104766963_Wnt2b	chr3	105762298	105763297	1000
chr11_59103743_59106479_Wnt3a	chr11	59318111	59319110	1000
chr14_29317453_29320874_Wnt5a	chr14	29145164	29146163	1000
chr12_110030583_110033282_Yy1	chr12	110674932	110675931	1000
chr7_30879614_30880927_Zfp260	chr7	30768270	30769269	1000
chr4_34829007_34832392_Zfp292	chr4	35104700	35105699	1000
chr8_90484546_90487815_Zfp423	chr8	90362180	90363179	1000
chr18_14128669_14133943_Zfp521	chr18	13271306	13272305	1000
chr18_14128669_14133943_Zfp521	chr18	13464306	13465305	1000
chr5_139059130_139061688_Zfp68	chr5	137356409	137357408	1000
chr5_139059130_139061688_Zfp68	chr5	138228409	138229408	1000
chr5_139059130_139061688_Zfp68	chr5	138612409	138613408	1000
chr14_57503946_57507329_Zmym2	chr14	58598638	58599637	1000

## Sheet: HL_E11.5
viewpoint	chrom	start	end	width
chr7_149844910_149848135_Igf2	chr7	149725522	149751521	26000
chr7_149626419_149629008_Tnni2	chr7	149721714	149737713	16000
chr1_164147278_164148832_Dnm3os	chr1	163928055	163942054	14000
chr3_29908469_29911947_Mecom	chr3	30402208	30416207	14000
chr15_102805257_102807929_Hoxc9	chr15	103126593	103138592	12000
chr6_84534909_84538416_Cyp26b1	chr6	84047662	84058661	11000
chr15_102795404_102798730_Hoxc10	chr15	103127067	103138066	11000
chr1_164147278_164148832_Dnm3os	chr1	163943055	163953054	10000
chr6_52195252_52198732_Hoxa11	chr6	51116992	51126991	10000
chr2_18599399_18601713_Bmi1	chr2	17946556	17955555	9000
chr6_52195252_52198732_Hoxa11	chr6	52910992	52919991	9000
chr8_87320883_87323459_Nfix	chr8	87233171	87242170	9000
chr13_55931559_55934572_Pitx1	chr13	56057066	56066065	9000
chr18_60782378_60785115_Synpo	chr18	60826746	60835745	9000
chr12_105709730_105713337_Gsc	chr12	106045534	106053533	8000
chr6_52211035_52213106_Hoxa13	chr6	51119070	51127069	8000
chr13_55931559_55934572_Pitx1	chr13	56258066	56266065	8000
chr15_102784024_102787175_Hoxc11	chr15	102773600	102780599	7000
chr2_33493858_33498287_Lmx1b	chr2	33569072	33576071	7000
chr2_18599399_18601713_Bmi1	chr2	17966556	17972555	6000
chr2_18599399_18601713_Bmi1	chr2	17975556	17981555	6000
chr11_94796731_94799690_Col1a1	chr11	94740210	94746209	6000
chr6_84534909_84538416_Cyp26b1	chr6	84081662	84087661	6000
chr6_84534909_84538416_Cyp26b1	chr6	84141662	84147661	6000
chr8_59799231_59802712_Hand2	chr8	59805972	59811971	6000
chr6_52195252_52198732_Hoxa11	chr6	50931992	50937991	6000
chr6_52195252_52198732_Hoxa11	chr6	52172992	52178991	6000
chr6_52211035_52213106_Hoxa13	chr6	52261070	52267069	6000
chr2_152561579_152563298_Id1	chr2	152529438	152535437	6000
chr19_3684281_3686353_Lrp5	chr19	3639317	3645316	6000
chr18_80907970_80911700_Nfatc1	chr18	80832835	80838834	6000
chr14_56442510_56445943_Nfatc4	chr14	56469226	56475225	6000
chr8_87320883_87323459_Nfix	chr8	87260171	87266170	6000
chr6_52662811_52665204_Tax1bp1	chr6	52200008	52206007	6000
chr6_72737065_72739646_Tcf7l1	chr6	72625356	72631355	6000
chr7_149626419_149629008_Tnni2	chr7	149664714	149670713	6000
chr7_149626419_149629008_Tnni2	chr7	149738714	149744713	6000
chr8_44391769_44393212_Zfp42	chr8	46019490	46025489	6000
chr2_18599399_18601713_Bmi1	chr2	17959556	17964555	5000
chr7_152123023_152126810_Ccnd1	chr7	152389916	152394915	5000
chr15_97832813_97835758_Col2a1	chr15	97855286	97860285	5000
chr7_140205030_140208448_Ctbp2	chr7	140826739	140831738	5000
chr6_84534909_84538416_Cyp26b1	chr6	84177662	84182661	5000
chr1_77510639_77513124_Epha4	chr1	75766882	75771881	5000
chr1_135933360_135936925_Fmod	chr1	135637142	135642141	5000
chr10_119910594_119913110_Hmga2	chr10	120142852	120147851	5000
chr15_102805257_102807929_Hoxc9	chr15	102777593	102782592	5000
chr2_74528796_74531118_Hoxd10	chr2	75795957	75800956	5000
chr2_74535540_74538148_Hoxd9	chr2	75795844	75800843	5000
chr9_64988092_64990778_Igdcc3	chr9	65008435	65013434	5000
chr13_115890083_115892736_Itga1	chr13	117811410	117816409	5000
chr17_24685553_24689486_Pkd1	chr17	24774520	24779519	5000
chr13_63665654_63670664_Ptch1	chr13	64017159	64022158	5000
chr11_98821857_98823528_Rara	chr11	98786692	98791691	5000
chr11_98821857_98823528_Rara	chr11	98800692	98805691	5000
chr12_74144893_74148226_Six1	chr12	74644560	74649559	5000
chr4_154593802_154596613_Ski	chr4	154506208	154511207	5000
chr4_154593802_154596613_Ski	chr4	154522208	154527207	5000
chr4_154593802_154596613_Ski	chr4	154546208	154551207	5000
chr9_63867549_63870701_Smad6	chr9	63806125	63811124	5000
chr9_63867549_63870701_Smad6	chr9	63826125	63831124	5000
chr18_75525548_75529772_Smad7	chr18	75660660	75665659	5000
chr9_21420114_21421636_Smarca4	chr9	21599875	21604874	5000
chr15_102195697_102197757_Sp7	chr15	102183727	102188726	5000
chr11_50023598_50024962_Sqstm1	chr11	50036280	50041279	5000
chr10_79894922_79897158_Tcf3	chr10	79859040	79864039	5000
chr6_72737065_72739646_Tcf7l1	chr6	72603356	72608355	5000
chr7_149626419_149629008_Tnni2	chr7	149750714	149755713	5000
chr7_4464872_4466692_Tnnt1	chr7	3642782	3647781	5000
chr17_25409415_25412199_Ube2i	chr17	25148807	25153806	5000
chr17_46165116_46169966_Vegfa	chr17	45870541	45875540	5000
chr8_90484546_90487815_Zfp423	chr8	90354180	90359179	5000
chr15_80084611_80087550_Atf4	chr15	80540080	80544079	4000
chr16_15886577_15889028_Cebpd	chr16	16301802	16305801	4000
chr6_4455175_4458605_Col1a2	chr6	5328890	5332889	4000
chr3_87751526_87754777_Crabp2	chr3	87762152	87766151	4000
chr7_140314221_140317388_Ctbp2	chr7	140826804	140830803	4000
chr9_120841457_120844370_Ctnnb1	chr9	120598914	120602913	4000
chr19_37771291_37773877_Cyp26a1	chr19	37979584	37983583	4000
chr8_26628987_26631865_Fgfr1	chr8	26652426	26656425	4000
chr19_5447409_5449287_Fosl1	chr19	3641348	3645347	4000
chr12_105709730_105713337_Gsc	chr12	105987534	105991533	4000
chr10_119910594_119913110_Hmga2	chr10	119987852	119991851	4000
chr15_102784024_102787175_Hoxc11	chr15	103133600	103137599	4000
chr15_102848536_102851167_Hoxc4	chr15	102770852	102774851	4000
chr15_102805257_102807929_Hoxc9	chr15	102770593	102774592	4000
chr15_102805257_102807929_Hoxc9	chr15	102790593	102794592	4000
chr2_74517642_74520443_Hoxd11	chr2	73365042	73369041	4000
chr2_74511740_74514909_Hoxd12	chr2	73365324	73369323	4000
chr2_152561579_152563298_Id1	chr2	152654438	152658437	4000
chr7_75095274_75099424_Igf1r	chr7	74969349	74973348	4000
chr7_75095274_75099424_Igf1r	chr7	75272349	75276348	4000
chr2_33493858_33498287_Lmx1b	chr2	33487072	33491071	4000
chr12_12946427_12949861_Mycn	chr12	12586144	12590143	4000
chr10_127102912_127105995_Nab2	chr10	127078454	127082453	4000
chr18_80907970_80911700_Nfatc1	chr18	80744835	80748834	4000
chr14_56442510_56445943_Nfatc4	chr14	55711226	55715225	4000
chr11_70467133_70469959_Pfn1	chr11	70480546	70484545	4000
chr13_55931559_55934572_Pitx1	chr13	55855066	55859065	4000
chr13_55931559_55934572_Pitx1	chr13	56165066	56169065	4000
chr11_51910567_51914502_Ppp2ca	chr11	51812534	51816533	4000
chr2_30699700_30701855_Prrx2	chr2	30294778	30298777	4000
chr2_30699700_30701855_Prrx2	chr2	30689778	30693777	4000
chr11_106116504_106117972_Psmc5	chr11	106076238	106080237	4000
chr11_98821857_98823528_Rara	chr11	99008692	99012691	4000
chr19_5636396_5639143_Rela	chr19	5607770	5611769	4000
chr12_74212462_74215129_Six4	chr12	74644796	74648795	4000
chr4_154593802_154596613_Ski	chr4	154517208	154521207	4000
chr11_96878986_96880992_Sp6	chr11	96836989	96840988	4000
chr3_99058023_99061810_Tbx15	chr3	99042916	99046915	4000
chr10_79894922_79897158_Tcf3	chr10	80038040	80042039	4000
chr19_55815031_55819344_Tcf7l2	chr19	56178188	56182187	4000
chr7_149626419_149629008_Tnni2	chr7	149762714	149766713	4000
chr15_50719712_50722752_Trps1	chr15	51604232	51608231	4000
chr1_93697637_93699620_Twist2	chr1	93495628	93499627	4000
chr15_66721970_66723921_Wisp1	chr15	68087946	68091945	4000
chr5_139059130_139061688_Zfp68	chr5	138634409	138638408	4000
chr15_101004077_101006768_Acvr1b	chr15	101931422	101934421	3000
chr12_53603896_53606591_Arhgap5	chr12	53703244	53706243	3000
chr2_73728822_73731611_Atf2	chr2	74521216	74524215	3000
chr15_80084611_80087550_Atf4	chr15	78857080	78860079	3000
chr7_152123023_152126810_Ccnd1	chr7	152364916	152367915	3000
chr7_35902387_35905796_Cebpa	chr7	35172092	35175091	3000
chr16_15886577_15889028_Cebpd	chr16	14162802	14165801	3000
chr5_33614803_33618159_Ctbp1	chr5	33719481	33722480	3000
chr10_126485191_126488182_Cyp27b1	chr10	126365686	126368685	3000
chr13_47199953_47203176_Dek	chr13	49060564	49063563	3000
chr1_164147278_164148832_Dnm3os	chr1	163966055	163969054	3000
chr16_20516628_20519070_Dvl3	chr16	21209849	21212848	3000
chr11_44429866_44432944_Ebf1	chr11	45362405	45365404	3000
chr14_67851751_67855038_Ebf2	chr14	68332394	68335393	3000
chr18_35019556_35021798_Egr1	chr18	35090677	35093676	3000
chr14_79880050_79882900_Elf1	chr14	79986475	79989474	3000
chr12_77277147_77279323_Esr2	chr12	77173235	77176234	3000
chr14_58689528_58694260_Fgf9	chr14	59819894	59822893	3000
chr8_26628987_26631865_Fgfr1	chr8	26549426	26552425	3000
chr5_34062714_34066174_Fgfr3	chr5	33998444	34001443	3000
chr12_86812679_86816216_Fos	chr12	86713448	86716447	3000
chr12_86812679_86816216_Fos	chr12	86795448	86798447	3000
chr19_5447409_5449287_Fosl1	chr19	5455348	5458347	3000
chr19_5447409_5449287_Fosl1	chr19	5486348	5489347	3000
chr19_5447409_5449287_Fosl1	chr19	7112348	7115347	3000
chr4_9769646_9772495_Gdf6	chr4	11117070	11120069	3000
chr10_126776500_126779948_Gli1	chr10	127929224	127932223	3000
chr1_120948787_120951013_Gli2	chr1	120720900	120723899	3000
chr4_107105912_107109316_Glis1	chr4	107281614	107284613	3000
chr8_59799231_59802712_Hand2	chr8	59028972	59031971	3000
chr8_59799231_59802712_Hand2	chr8	59819972	59822971	3000
chr10_119910594_119913110_Hmga2	chr10	120181852	120184851	3000
chr10_119910594_119913110_Hmga2	chr10	120287852	120290851	3000
chr6_52195252_52198732_Hoxa11	chr6	52181992	52184991	3000
chr15_102784024_102787175_Hoxc11	chr15	102576600	102579599	3000
chr15_102784024_102787175_Hoxc11	chr15	103126600	103129599	3000
chr2_74528796_74531118_Hoxd10	chr2	74521957	74524956	3000
chr2_74517642_74520443_Hoxd11	chr2	73747042	73750041	3000
chr2_74511740_74514909_Hoxd12	chr2	73747324	73750323	3000
chr2_74503399_74506910_Hoxd13	chr2	73747154	73750153	3000
chr2_74535540_74538148_Hoxd9	chr2	74522844	74525843	3000
chr2_74535540_74538148_Hoxd9	chr2	75445844	75448843	3000
chr2_74535540_74538148_Hoxd9	chr2	75495844	75498843	3000
chr4_135698434_135701733_Id3	chr4	135606084	135609083	3000
chr16_49698437_49700858_Ift57	chr16	49853648	49856647	3000
chr7_149844910_149848135_Igf2	chr7	149504522	149507521	3000
chr7_149844910_149848135_Igf2	chr7	149665522	149668521	3000
chr7_149844910_149848135_Igf2	chr7	149721522	149724521	3000
chr8_87499950_87503039_Junb	chr8	86238494	86241493	3000
chr15_38228931_38232336_Klf10	chr15	39772634	39775633	3000
chr8_74841120_74844160_Klf2	chr8	73118640	73121639	3000
chr2_33493858_33498287_Lmx1b	chr2	33559072	33562071	3000
chr1_127807483_127809680_Lypd1	chr1	129100582	129103581	3000
chr1_127807483_127809680_Lypd1	chr1	129670582	129673581	3000
chr3_29908469_29911947_Mecom	chr3	30003208	30006207	3000
chr19_6334758_6337042_Men1	chr19	5037900	5040899	3000
chr7_142906276_142909505_Mki67	chr7	144501890	144504889	3000
chr14_31691416_31693844_Mustn1	chr14	29783630	29786629	3000
chr7_134353601_134355810_Mylpf	chr7	134373706	134376705	3000
chr18_80907970_80911700_Nfatc1	chr18	80762835	80765834	3000
chr4_139387763_139390860_Pax7	chr4	140203312	140206311	3000
chr13_55931559_55934572_Pitx1	chr13	56234066	56237065	3000
chr17_28369475_28373816_Ppard	chr17	28462646	28465645	3000
chr2_30699700_30701855_Prrx2	chr2	30725778	30728777	3000
chr13_63665654_63670664_Ptch1	chr13	63915159	63918158	3000
chr11_98798642_98800671_Rara	chr11	100331656	100334655	3000
chr9_108207401_108210367_Rhoa	chr9	108248884	108251883	3000
chr2_53936670_53939178_Rprm	chr2	53048924	53051923	3000
chr2_168590196_168593796_Sall4	chr2	170335996	170338995	3000
chr9_63867549_63870701_Smad6	chr9	63932125	63935124	3000
chr9_21420114_21421636_Smarca4	chr9	21349875	21352874	3000
chr19_46470246_46472935_Sufu	chr19	46575590	46578589	3000
chr17_8564620_8566874_T2	chr17	8475747	8478746	3000
chr6_52662811_52665204_Tax1bp1	chr6	52216008	52219007	3000
chr16_18585392_18588330_Tbx1	chr16	18423861	18426860	3000
chr11_85702310_85705082_Tbx4	chr11	85739696	85742695	3000
chr18_69502950_69505851_Tcf4	chr18	69355400	69358399	3000
chr18_69751407_69754269_Tcf4	chr18	69355838	69358837	3000
chr7_26471403_26474526_Tgfb1	chr7	27978964	27981963	3000
chr12_87417484_87420547_Tgfb3	chr12	87299016	87302015	3000
chr13_56710029_56712867_Tgfbi	chr13	56699448	56702447	3000
chr4_53837159_53839746_Tmem38b	chr4	55361452	55364451	3000
chr15_98763803_98766015_Tuba1b	chr15	98699909	98702908	3000
chr6_128304538_128306471_Tulp3	chr6	126700504	126703503	3000
chr17_25409415_25412199_Ube2i	chr17	25320807	25323806	3000
chr17_46165116_46169966_Vegfa	chr17	45860541	45863540	3000
chr3_104763632_104766963_Wnt2b	chr3	104592298	104595297	3000
chr12_110030583_110033282_Yy1	chr12	111837932	111840931	3000
chr15_101004077_101006768_Acvr1b	chr15	99174422	99176421	2000
chr12_53603896_53606591_Arhgap5	chr12	52929244	52931243	2000
chr2_73728822_73731611_Atf2	chr2	74493216	74495215	2000
chr2_73728822_73731611_Atf2	chr2	74508216	74510215	2000
chr15_80084611_80087550_Atf4	chr15	81575080	81577079	2000
chr2_172763233_172766213_Bmp7	chr2	172671723	172673722	2000
chr18_46886623_46889064_Cdo1	chr18	46755844	46757843	2000
chr8_72895934_72899081_Comp	chr8	73027508	73029507	2000
chr9_120841457_120844370_Ctnnb1	chr9	120511914	120513913	2000
chr19_37758209_37760884_Cyp26c1	chr19	37979546	37981545	2000
chr10_96940927_96943536_Dcn	chr10	94977232	94979231	2000
chr16_20516628_20519070_Dvl3	chr16	20672849	20674848	2000
chr18_35019556_35021798_Egr1	chr18	35758677	35760676	2000
chr15_81414980_81418011_Ep300	chr15	81229496	81231495	2000
chr12_77277147_77279323_Esr2	chr12	76917235	76919234	2000
chr2_74495971_74499159_Evx2	chr2	73747565	73749564	2000
chr11_33044944_33049171_Fgf18	chr11	32355058	32357057	2000
chr11_33044944_33049171_Fgf18	chr11	32864058	32866057	2000
chr19_45816056_45818653_Fgf8	chr19	45734354	45736353	2000
chr5_109122901_109126214_Fgfrl1	chr5	110536558	110538557	2000
chr5_109122901_109126214_Fgfrl1	chr5	110813558	110815557	2000
chr1_135933360_135936925_Fmod	chr1	135630142	135632141	2000
chr19_5447409_5449287_Fosl1	chr19	7143348	7145347	2000
chr18_9211622_9214739_Fzd8	chr18	7868180	7870179	2000
chr1_180252359_180254574_Gm16586	chr1	180264466	180266465	2000
chr13_112278206_112281506_Gpbp1	chr13	112476856	112478855	2000
chr16_38087970_38092456_Gsk3b	chr16	37683213	37685212	2000
chr8_83016074_83018469_Gypa	chr8	82163272	82165271	2000
chr11_74982141_74984745_Hic1	chr11	74642443	74644442	2000
chr12_75007551_75011578_Hif1a	chr12	73859564	73861563	2000
chr12_75007551_75011578_Hif1a	chr12	76917564	76919563	2000
chr6_52195252_52198732_Hoxa11	chr6	51133992	51135991	2000
chr6_52195252_52198732_Hoxa11	chr6	52787992	52789991	2000
chr6_52211035_52213106_Hoxa13	chr6	51134070	51136069	2000
chr6_52211035_52213106_Hoxa13	chr6	52902070	52904069	2000
chr15_102795404_102798730_Hoxc10	chr15	102584067	102586066	2000
chr15_102795404_102798730_Hoxc10	chr15	102774067	102776066	2000
chr15_102795404_102798730_Hoxc10	chr15	102777067	102779066	2000
chr15_102795404_102798730_Hoxc10	chr15	102813067	102815066	2000
chr15_102784024_102787175_Hoxc11	chr15	102573600	102575599	2000
chr15_102784024_102787175_Hoxc11	chr15	102767600	102769599	2000
chr15_102784024_102787175_Hoxc11	chr15	102770600	102772599	2000
chr15_102784024_102787175_Hoxc11	chr15	102792600	102794599	2000
chr15_102848536_102851167_Hoxc4	chr15	102767852	102769851	2000
chr15_102805257_102807929_Hoxc9	chr15	102812593	102814592	2000
chr2_74517642_74520443_Hoxd11	chr2	74524042	74526041	2000
chr2_74511740_74514909_Hoxd12	chr2	74523324	74525323	2000
chr7_148134123_148136461_Ifitm5	chr7	148247292	148249291	2000
chr7_149844910_149848135_Igf2	chr7	149693522	149695521	2000
chr10_119638151_119640580_Irak3	chr10	120309366	120311365	2000
chr1_194978901_194980831_Irf6	chr1	194561866	194563865	2000
chr4_55543909_55546908_Klf4	chr4	55663408	55665407	2000
chr17_23881797_23884110_Kremen2	chr17	23964954	23966953	2000
chr19_45308187_45310704_Lbx1	chr19	45734446	45736445	2000
chr3_130812216_130815371_Lef1	chr3	130431794	130433793	2000
chr10_45188881_45191794_Lin28b	chr10	43299338	43301337	2000
chr19_3684281_3686353_Lrp5	chr19	3766317	3768316	2000
chr19_6334758_6337042_Men1	chr19	5295900	5297899	2000
chr5_38213280_38216792_Msx1	chr5	38359036	38361035	2000
chr12_12946427_12949861_Mycn	chr12	13188144	13190143	2000
chr14_55612678_55614766_Myh7	chr14	55529722	55531721	2000
chr10_127102912_127105995_Nab2	chr10	127473454	127475453	2000
chr2_168424925_168427771_Nfatc2	chr2	168378348	168380347	2000
chr2_168424925_168427771_Nfatc2	chr2	170044348	170046347	2000
chr8_87320883_87323459_Nfix	chr8	87269171	87271170	2000
chr11_70467133_70469959_Pfn1	chr11	69829546	69831545	2000
chr17_28369475_28373816_Ppard	chr17	28382646	28384645	2000
chr5_123677462_123679523_Psmd9	chr5	123298492	123300491	2000
chr11_98798642_98800671_Rara	chr11	98995656	98997655	2000
chr11_29447027_29448915_Rps27a	chr11	29071971	29073970	2000
chr12_110837272_110841113_Rtl1	chr12	112403192	112405191	2000
chr15_76286959_76290006_Scx	chr15	77671482	77673481	2000
chr12_74212462_74215129_Six4	chr12	74152796	74154795	2000
chr4_154593802_154596613_Ski	chr4	154562208	154564207	2000
chr9_63604233_63607322_Smad3	chr9	62657778	62659777	2000
chr9_63604233_63607322_Smad3	chr9	65433778	65435777	2000
chr18_75525548_75529772_Smad7	chr18	75417660	75419659	2000
chr3_54557451_54560918_Smad9	chr3	55588184	55590183	2000
chr9_21420114_21421636_Smarca4	chr9	21526875	21528874	2000
chr12_28025698_28028497_Sox11	chr12	27099098	27101097	2000
chr12_28025698_28028497_Sox11	chr12	27217098	27219097	2000
chr6_144155558_144157976_Sox5	chr6	144892767	144894766	2000
chr6_144729196_144732774_Sox5	chr6	144210985	144212984	2000
chr11_112641359_112646504_Sox9	chr11	112873932	112875931	2000
chr11_112641359_112646504_Sox9	chr11	113542932	113544931	2000
chr2_72814956_72817313_Sp3	chr2	72315134	72317133	2000
chr19_46470246_46472935_Sufu	chr19	46604590	46606589	2000
chr18_60782378_60785115_Synpo	chr18	58996746	58998745	2000
chr18_60782378_60785115_Synpo	chr18	60804746	60806745	2000
chr18_60782378_60785115_Synpo	chr18	60814746	60816745	2000
chr17_8625006_8627725_T	chr17	7030366	7032365	2000
chr6_52662811_52665204_Tax1bp1	chr6	51125008	51127007	2000
chr6_52662811_52665204_Tax1bp1	chr6	52261008	52263007	2000
chr3_21973234_21977082_Tbl1xr1	chr3	21834158	21836157	2000
chr10_79894922_79897158_Tcf3	chr10	80140040	80142039	2000
chr6_72737065_72739646_Tcf7l1	chr6	72658356	72660355	2000
chr6_72737065_72739646_Tcf7l1	chr6	72661356	72663355	2000
chr2_172375912_172378889_Tfap2c	chr2	172486400	172488399	2000
chr2_172375912_172378889_Tfap2c	chr2	172824400	172826399	2000
chr4_63706260_63709304_Tnc	chr4	63119782	63121781	2000
chr4_63706260_63709304_Tnc	chr4	63153782	63155781	2000
chr7_149626419_149629008_Tnni2	chr7	149518714	149520713	2000
chr7_149626419_149629008_Tnni2	chr7	149673714	149675713	2000
chr4_43534335_43537745_Tpm2	chr4	43573040	43575039	2000
chr17_46165116_46169966_Vegfa	chr17	46008541	46010540	2000
chr15_98619059_98621568_Wnt1	chr15	98397314	98399313	2000
chr15_98619059_98621568_Wnt1	chr15	98462314	98464313	2000
chr3_104763632_104766963_Wnt2b	chr3	104666298	104668297	2000
chr15_85409954_85412945_Wnt7b	chr15	85166450	85168449	2000
chr11_59118966_59122269_Wnt9a	chr11	59318618	59320617	2000
chr12_110030583_110033282_Yy1	chr12	110071932	110073931	2000
chr18_5591240_5594740_Zeb1	chr18	6488990	6490989	2000
chr7_30879614_30880927_Zfp260	chr7	29250270	29252269	2000
chr18_14128669_14133943_Zfp521	chr18	13191306	13193305	2000
chr18_14128669_14133943_Zfp521	chr18	13463306	13465305	2000
chr14_57503946_57507329_Zmym2	chr14	57428638	57430637	2000
chr10_78559712_78561364_2610008E11Rik	chr10	78035538	78036537	1000
chr10_81022383_81023877_Aes	chr10	79603130	79604129	1000
chr10_81022383_81023877_Aes	chr10	79621130	79622129	1000
chr10_81022383_81023877_Aes	chr10	79726130	79727129	1000
chr1_38682506_38686209_Aff3	chr1	38814358	38815357	1000
chr14_78935084_78938166_Akap11	chr14	77024625	77025624	1000
chr9_71062568_71065630_Aldh1a2	chr9	71332099	71333098	1000
chr2_73728822_73731611_Atf2	chr2	73747216	73748215	1000
chr2_73728822_73731611_Atf2	chr2	75542216	75543215	1000
chr2_18599399_18601713_Bmi1	chr2	17987556	17988555	1000
chr2_18599399_18601713_Bmi1	chr2	18613556	18614555	1000
chr2_172763233_172766213_Bmp7	chr2	172669723	172670722	1000
chr2_172763233_172766213_Bmp7	chr2	174684723	174685722	1000
chr14_35314826_35317242_Bmpr1a	chr14	35360034	35361033	1000
chr16_20731852_20734764_Chrd	chr16	21203308	21204307	1000
chr11_94796731_94799690_Col1a1	chr11	94736210	94737209	1000
chr15_97832813_97835758_Col2a1	chr15	96541286	96542285	1000
chr15_97832813_97835758_Col2a1	chr15	97922286	97923285	1000
chr15_97832813_97835758_Col2a1	chr15	98702286	98703285	1000
chr8_72895934_72899081_Comp	chr8	73015508	73016507	1000
chr8_72895934_72899081_Comp	chr8	73017508	73018507	1000
chr8_72895934_72899081_Comp	chr8	73031508	73032507	1000
chr8_72895934_72899081_Comp	chr8	73061508	73062507	1000
chr8_72895934_72899081_Comp	chr8	73117508	73118507	1000
chr8_72895934_72899081_Comp	chr8	73120508	73121507	1000
chr9_54611791_54613863_Crabp1	chr9	54650827	54651826	1000
chr6_117117047_117119951_Cxcl12	chr6	116909499	116910498	1000
chr6_117117047_117119951_Cxcl12	chr6	117868499	117869498	1000
chr6_84534909_84538416_Cyp26b1	chr6	84091662	84092661	1000
chr19_37758209_37760884_Cyp26c1	chr19	37982546	37983545	1000
chr10_126485191_126488182_Cyp27b1	chr10	126369686	126370685	1000
chr10_96940927_96943536_Dcn	chr10	98568232	98569231	1000
chr13_47199953_47203176_Dek	chr13	49064564	49065563	1000
chr6_6813961_6817080_Dlx6	chr6	6164520	6165519	1000
chr6_6813961_6817080_Dlx6	chr6	6528520	6529519	1000
chr1_164147278_164148832_Dnm3os	chr1	164007055	164008054	1000
chr1_164147278_164148832_Dnm3os	chr1	164118055	164119054	1000
chr16_20516628_20519070_Dvl3	chr16	18876849	18877848	1000
chr2_154394484_154397002_E2f1	chr2	152749743	152750742	1000
chr18_35019556_35021798_Egr1	chr18	35045677	35046676	1000
chr14_33324761_33328559_Ercc6	chr14	32307660	32308659	1000
chr14_71040635_71042622_Fgf17	chr14	70867628	70868627	1000
chr14_71040635_71042622_Fgf17	chr14	70869628	70870627	1000
chr14_71040635_71042622_Fgf17	chr14	70920628	70921627	1000
chr11_33044944_33049171_Fgf18	chr11	32541058	32542057	1000
chr11_33044944_33049171_Fgf18	chr11	32862058	32863057	1000
chr12_86812679_86816216_Fos	chr12	86826448	86827447	1000
chr12_86812679_86816216_Fos	chr12	88226448	88227447	1000
chr12_86812679_86816216_Fos	chr12	88229448	88230447	1000
chr12_86812679_86816216_Fos	chr12	88235448	88236447	1000
chr19_5447409_5449287_Fosl1	chr19	3904348	3905347	1000
chr19_5447409_5449287_Fosl1	chr19	4000348	4001347	1000
chr19_5447409_5449287_Fosl1	chr19	5426348	5427347	1000
chr5_135724445_135727028_Fzd9	chr5	136252736	136253735	1000
chr4_9769646_9772495_Gdf6	chr4	10801070	10802069	1000
chr4_9769646_9772495_Gdf6	chr4	10933070	10934069	1000
chr12_8307831_8309670_Gdf7	chr12	8506750	8507749	1000
chr10_126776500_126779948_Gli1	chr10	128330224	128331223	1000
chr1_120948787_120951013_Gli2	chr1	120799900	120800899	1000
chr1_180252359_180254574_Gm16586	chr1	180993466	180994465	1000
chr13_112278206_112281506_Gpbp1	chr13	112474856	112475855	1000
chr12_105709730_105713337_Gsc	chr12	105829534	105830533	1000
chr12_105709730_105713337_Gsc	chr12	106177534	106178533	1000
chr8_59799231_59802712_Hand2	chr8	59791972	59792971	1000
chr8_59799231_59802712_Hand2	chr8	59813972	59814971	1000
chr8_59799231_59802712_Hand2	chr8	59817972	59818971	1000
chr19_39004451_39007635_Hells	chr19	40905043	40906042	1000
chr11_74982141_74984745_Hic1	chr11	74711443	74712442	1000
chr10_119910594_119913110_Hmga2	chr10	120156852	120157851	1000
chr10_119910594_119913110_Hmga2	chr10	120159852	120160851	1000
chr10_119910594_119913110_Hmga2	chr10	120309852	120310851	1000
chr6_52195252_52198732_Hoxa11	chr6	50770992	50771991	1000
chr6_52195252_52198732_Hoxa11	chr6	52201992	52202991	1000
chr6_52195252_52198732_Hoxa11	chr6	52899992	52900991	1000
chr6_52195252_52198732_Hoxa11	chr6	52901992	52902991	1000
chr6_52211035_52213106_Hoxa13	chr6	50929070	50930069	1000
chr6_52211035_52213106_Hoxa13	chr6	50932070	50933069	1000
chr6_52211035_52213106_Hoxa13	chr6	52218070	52219069	1000
chr6_52211035_52213106_Hoxa13	chr6	52788070	52789069	1000
chr6_52211035_52213106_Hoxa13	chr6	52900070	52901069	1000
chr6_52211035_52213106_Hoxa13	chr6	52916070	52917069	1000
chr11_96131619_96133714_Hoxb9	chr11	96113666	96114665	1000
chr11_96131619_96133714_Hoxb9	chr11	96689666	96690665	1000
chr15_102795404_102798730_Hoxc10	chr15	102503067	102504066	1000
chr15_102795404_102798730_Hoxc10	chr15	102780067	102781066	1000
chr15_102795404_102798730_Hoxc10	chr15	103070067	103071066	1000
chr15_102784024_102787175_Hoxc11	chr15	102584600	102585599	1000
chr15_102784024_102787175_Hoxc11	chr15	102812600	102813599	1000
chr15_102848536_102851167_Hoxc4	chr15	102778852	102779851	1000
chr15_102805257_102807929_Hoxc9	chr15	102577593	102578592	1000
chr15_102805257_102807929_Hoxc9	chr15	102775593	102776592	1000
chr2_74528796_74531118_Hoxd10	chr2	73384957	73385956	1000
chr2_74528796_74531118_Hoxd10	chr2	73748957	73749956	1000
chr2_74528796_74531118_Hoxd10	chr2	75446957	75447956	1000
chr2_74528796_74531118_Hoxd10	chr2	75493957	75494956	1000
chr2_74528796_74531118_Hoxd10	chr2	75540957	75541956	1000
chr2_74517642_74520443_Hoxd11	chr2	75448042	75449041	1000
chr2_74503399_74506910_Hoxd13	chr2	74524154	74525153	1000
chr2_74535540_74538148_Hoxd9	chr2	75493844	75494843	1000
chr2_74535540_74538148_Hoxd9	chr2	75542844	75543843	1000
chr7_148134123_148136461_Ifitm5	chr7	148128292	148129291	1000
chr7_75095274_75099424_Igf1r	chr7	73253349	73254348	1000
chr7_75095274_75099424_Igf1r	chr7	75408349	75409348	1000
chr7_149844910_149848135_Igf2	chr7	148748522	148749521	1000
chr7_149844910_149848135_Igf2	chr7	149518522	149519521	1000
chr7_149844910_149848135_Igf2	chr7	149656522	149657521	1000
chr7_149844910_149848135_Igf2	chr7	149658522	149659521	1000
chr7_149844910_149848135_Igf2	chr7	149669522	149670521	1000
chr7_149844910_149848135_Igf2	chr7	149674522	149675521	1000
chr17_12958114_12962181_Igf2r	chr17	12935148	12936147	1000
chr17_25014180_25016935_Igfals	chr17	25031558	25032557	1000
chr13_16102561_16105504_Inhba	chr13	18035032	18036031	1000
chr1_194978901_194980831_Irf6	chr1	193397866	193398865	1000
chr9_58005708_58008732_Islr	chr9	56009220	56010219	1000
chr8_87499950_87503039_Junb	chr8	87561494	87562493	1000
chr15_38228931_38232336_Klf10	chr15	36723634	36724633	1000
chr2_33493858_33498287_Lmx1b	chr2	33438072	33439071	1000
chr2_33493858_33498287_Lmx1b	chr2	33501072	33502071	1000
chr19_3684281_3686353_Lrp5	chr19	3708317	3709316	1000
chr6_134514703_134517662_Lrp6	chr6	134389182	134390181	1000
chr16_16982837_16985470_Mapk1	chr16	17070154	17071153	1000
chr11_98053496_98054837_Med1	chr11	97884166	97885165	1000
chr11_98053496_98054837_Med1	chr11	97886166	97887165	1000
chr19_6334758_6337042_Men1	chr19	6059900	6060899	1000
chr14_31691416_31693844_Mustn1	chr14	31682630	31683629	1000
chr12_12946427_12949861_Mycn	chr12	12689144	12690143	1000
chr12_12946427_12949861_Mycn	chr12	13191144	13192143	1000
chr14_55612678_55614766_Myh7	chr14	55546722	55547721	1000
chr1_136186190_136188541_MyoG	chr1	135318366	135319365	1000
chr18_80907970_80911700_Nfatc1	chr18	80665835	80666834	1000
chr18_80907970_80911700_Nfatc1	chr18	80819835	80820834	1000
chr14_56442510_56445943_Nfatc4	chr14	56517226	56518225	1000
chr8_87320883_87323459_Nfix	chr8	87231171	87232170	1000
chr3_135351946_135355572_Nfkb1	chr3	135101759	135102758	1000
chr3_135351946_135355572_Nfkb1	chr3	135103759	135104758	1000
chr11_78508970_78512346_Nlk	chr11	79481658	79482657	1000
chr2_147189990_147192235_Pax1	chr2	145709112	145710111	1000
chr11_70467133_70469959_Pfn1	chr11	68910546	68911545	1000
chr11_70467133_70469959_Pfn1	chr11	68933546	68934545	1000
chr17_24685553_24689486_Pkd1	chr17	24614520	24615519	1000
chr17_28369475_28373816_Ppard	chr17	28394646	28395645	1000
chr17_21080536_21083642_Ppp2r1a	chr17	21669089	21670088	1000
chr2_30699700_30701855_Prrx2	chr2	30719778	30720777	1000
chr4_116768060_116771262_Ptch2	chr4	116791661	116792660	1000
chr6_147209685_147213258_Pthlh	chr6	148161472	148162471	1000
chr11_98798642_98800671_Rara	chr11	99006656	99007655	1000
chr11_98821857_98823528_Rara	chr11	98884692	98885691	1000
chr14_73724127_73727004_Rb1	chr14	73541566	73542565	1000
chr2_157028826_157031627_Rbl1	chr2	157390226	157391225	1000
chr2_157028826_157031627_Rbl1	chr2	157393226	157394225	1000
chr9_108207401_108210367_Rhoa	chr9	108241884	108242883	1000
chr11_29447027_29448915_Rps27a	chr11	29592971	29593970	1000
chr4_134706877_134709942_Runx3	chr4	134720410	134721409	1000
chr8_91564336_91569242_Sall1	chr8	92180789	92181788	1000
chr2_168590196_168593796_Sall4	chr2	170167996	170168995	1000
chr9_63867549_63870701_Smad6	chr9	63804125	63805124	1000
chr18_75525548_75529772_Smad7	chr18	75424660	75425659	1000
chr18_75525548_75529772_Smad7	chr18	75623660	75624659	1000
chr9_21420114_21421636_Smarca4	chr9	21653875	21654874	1000
chr19_23346653_23348500_Smc5	chr19	21852576	21853575	1000
chr19_23346653_23348500_Smc5	chr19	23762576	23763575	1000
chr11_106780307_106783821_Smurf2	chr11	108754064	108755063	1000
chr1_4485407_4488172_Sox17	chr1	6204790	6205789	1000
chr6_144729196_144732774_Sox5	chr6	143113985	143114984	1000
chr7_123174364_123178112_Sox6	chr7	122595238	122596237	1000
chr15_102195697_102197757_Sp7	chr15	102205727	102206726	1000
chr15_102195697_102197757_Sp7	chr15	102503727	102504726	1000
chr15_102195697_102197757_Sp7	chr15	103135727	103136726	1000
chr2_69699429_69701481_Ssb	chr2	69561455	69562454	1000
chr11_100799145_100801066_Stat3	chr11	99090106	99091105	1000
chr18_60782378_60785115_Synpo	chr18	58994746	58995745	1000
chr6_52662811_52665204_Tax1bp1	chr6	52208008	52209007	1000
chr6_52662811_52665204_Tax1bp1	chr6	52222008	52223007	1000
chr16_18585392_18588330_Tbx1	chr16	18499861	18500860	1000
chr3_99058023_99061810_Tbx15	chr3	99039916	99040915	1000
chr11_85644477_85646356_Tbx2	chr11	85527416	85528415	1000
chr11_85702310_85705082_Tbx4	chr11	85651696	85652695	1000
chr11_85702310_85705082_Tbx4	chr11	85653696	85654695	1000
chr11_85702310_85705082_Tbx4	chr11	85697696	85698695	1000
chr19_55815031_55819344_Tcf7l2	chr19	55672188	55673187	1000
chr19_55815031_55819344_Tcf7l2	chr19	55738188	55739187	1000
chr8_13337175_13340621_Tfdp1	chr8	13783898	13784897	1000
chr7_26471403_26474526_Tgfb1	chr7	26496964	26497963	1000
chr13_56710029_56712867_Tgfbi	chr13	56685448	56686447	1000
chr7_149626419_149629008_Tnni2	chr7	149659714	149660713	1000
chr7_149626419_149629008_Tnni2	chr7	149694714	149695713	1000
chr7_149626419_149629008_Tnni2	chr7	149716714	149717713	1000
chr7_4464872_4466692_Tnnt1	chr7	3291782	3292781	1000
chr4_43534335_43537745_Tpm2	chr4	43456040	43457039	1000
chr15_98763803_98766015_Tuba1b	chr15	98783909	98784908	1000
chr15_98763803_98766015_Tuba1b	chr15	98821909	98822908	1000
chr17_25409415_25412199_Ube2i	chr17	25922807	25923806	1000
chr17_46165116_46169966_Vegfa	chr17	45891541	45892540	1000
chr17_46165116_46169966_Vegfa	chr17	46011541	46012540	1000
chr17_46165116_46169966_Vegfa	chr17	46025541	46026540	1000
chr10_38882360_38884604_Wisp3	chr10	39252482	39253481	1000
chr10_38882360_38884604_Wisp3	chr10	39271482	39272481	1000
chr10_38882360_38884604_Wisp3	chr10	39334482	39335481	1000
chr15_98619059_98621568_Wnt1	chr15	98465314	98466313	1000
chr15_98606409_98609148_Wnt10b	chr15	98464778	98465777	1000
chr7_105983038_105985614_Wnt11	chr7	105803326	105804325	1000
chr18_5591240_5594740_Zeb1	chr18	5160990	5161989	1000
chr8_90484546_90487815_Zfp423	chr8	90184180	90185179	1000
chr8_90484546_90487815_Zfp423	chr8	90360180	90361179	1000
chr14_57503946_57507329_Zmym2	chr14	55529638	55530637	1000

## Sheet: FL_E13.5
viewpoint	chrom	start	end	width
chr1_164147278_164148832_Dnm3os	chr1	163927055	163954054	27000
chr5_120282740_120286014_Tbx5	chr5	120245377	120258376	13000
chr1_164147278_164148832_Dnm3os	chr1	163904055	163916054	12000
chr2_18599399_18601713_Bmi1	chr2	17970556	17979555	9000
chr6_52195252_52198732_Hoxa11	chr6	51116992	51125991	9000
chr6_52211035_52213106_Hoxa13	chr6	51117070	51126069	9000
chr7_149844910_149848135_Igf2	chr7	149722522	149731521	9000
chr3_29908469_29911947_Mecom	chr3	30407208	30416207	9000
chr6_52662811_52665204_Tax1bp1	chr6	51117008	51126007	9000
chr11_74982141_74984745_Hic1	chr11	74824443	74832442	8000
chr11_74982141_74984745_Hic1	chr11	74859443	74867442	8000
chr8_87320883_87323459_Nfix	chr8	87233171	87241170	8000
chr8_87320883_87323459_Nfix	chr8	87242171	87250170	8000
chr8_87320883_87323459_Nfix	chr8	87261171	87268170	7000
chr8_87320883_87323459_Nfix	chr8	87269171	87276170	7000
chr15_50719712_50722752_Trps1	chr15	51626232	51633231	7000
chr1_164147278_164148832_Dnm3os	chr1	163971055	163977054	6000
chr1_164147278_164148832_Dnm3os	chr1	164240055	164246054	6000
chr2_74535540_74538148_Hoxd9	chr2	75795844	75801843	6000
chr7_149844910_149848135_Igf2	chr7	149617522	149623521	6000
chr4_154593802_154596613_Ski	chr4	154546208	154552207	6000
chr6_72737065_72739646_Tcf7l1	chr6	72602356	72608355	6000
chr15_98763803_98766015_Tuba1b	chr15	98818909	98824908	6000
chr15_80084611_80087550_Atf4	chr15	80538080	80543079	5000
chr2_18599399_18601713_Bmi1	chr2	17947556	17952555	5000
chr7_152123023_152126810_Ccnd1	chr7	152378916	152383915	5000
chr16_15886577_15889028_Cebpd	chr16	14703802	14708801	5000
chr11_94796731_94799690_Col1a1	chr11	94740210	94745209	5000
chr9_120841457_120844370_Ctnnb1	chr9	120597914	120602913	5000
chr1_164147278_164148832_Dnm3os	chr1	164062055	164067054	5000
chr2_152561579_152563298_Id1	chr2	152529438	152534437	5000
chr2_152561579_152563298_Id1	chr2	152644438	152649437	5000
chr7_75095274_75099424_Igf1r	chr7	75272349	75277348	5000
chr7_149844910_149848135_Igf2	chr7	149640522	149645521	5000
chr7_149844910_149848135_Igf2	chr7	149712522	149717521	5000
chr3_29908469_29911947_Mecom	chr3	30401208	30406207	5000
chr18_80907970_80911700_Nfatc1	chr18	80825835	80830834	5000
chr11_70467133_70469959_Pfn1	chr11	69227546	69232545	5000
chr4_154593802_154596613_Ski	chr4	154505208	154510207	5000
chr4_154593802_154596613_Ski	chr4	154517208	154522207	5000
chr9_63867549_63870701_Smad6	chr9	63805125	63810124	5000
chr6_52662811_52665204_Tax1bp1	chr6	52188008	52193007	5000
chr18_69751407_69754269_Tcf4	chr18	69508838	69513837	5000
chr7_149626419_149629008_Tnni2	chr7	149690714	149695713	5000
chr10_78559712_78561364_2610008E11Rik	chr10	78035538	78039537	4000
chr16_20731852_20734764_Chrd	chr16	21208308	21212307	4000
chr11_94796731_94799690_Col1a1	chr11	94732210	94736209	4000
chr1_164147278_164148832_Dnm3os	chr1	163964055	163968054	4000
chr10_66998706_67001124_Egr2	chr10	68646915	68650914	4000
chr1_77510639_77513124_Epha4	chr1	75827882	75831881	4000
chr13_119501869_119505236_Fgf10	chr13	120276552	120280551	4000
chr1_135933360_135936925_Fmod	chr1	135639142	135643141	4000
chr18_9211622_9214739_Fzd8	chr18	8643180	8647179	4000
chr1_120948787_120951013_Gli2	chr1	120719900	120723899	4000
chr13_115890083_115892736_Itga1	chr13	117812410	117816409	4000
chr2_33493858_33498287_Lmx1b	chr2	33572072	33576071	4000
chr19_3684281_3686353_Lrp5	chr19	5486317	5490316	4000
chr3_29908469_29911947_Mecom	chr3	30117208	30121207	4000
chr7_142906276_142909505_Mki67	chr7	144508890	144512889	4000
chr14_56442510_56445943_Nfatc4	chr14	56469226	56473225	4000
chr2_30699700_30701855_Prrx2	chr2	30690778	30694777	4000
chr3_115416570_115419596_S1pr1	chr3	115708083	115712082	4000
chr14_106295079_106298486_Spry2	chr14	105725782	105729781	4000
chr3_21973234_21977082_Tbl1xr1	chr3	21833158	21837157	4000
chr7_133923872_133926827_Tbx6	chr7	133933350	133937349	4000
chr10_79894922_79897158_Tcf3	chr10	79860040	79864039	4000
chr6_72737065_72739646_Tcf7l1	chr6	72564356	72568355	4000
chr7_149626419_149629008_Tnni2	chr7	149762714	149766713	4000
chr7_4464872_4466692_Tnnt1	chr7	3595782	3599781	4000
chr7_4464872_4466692_Tnnt1	chr7	3614782	3618781	4000
chr15_50719712_50722752_Trps1	chr15	51332232	51336231	4000
chr17_46165116_46169966_Vegfa	chr17	45871541	45875540	4000
chr12_110030583_110033282_Yy1	chr12	110637932	110641931	4000
chr18_5591240_5594740_Zeb1	chr18	5160990	5164989	4000
chr7_30879614_30880927_Zfp260	chr7	29594270	29598269	4000
chr5_139059130_139061688_Zfp68	chr5	138612409	138616408	4000
chr15_101004077_101006768_Acvr1b	chr15	99646422	99649421	3000
chr10_81022383_81023877_Aes	chr10	81066130	81069129	3000
chr7_152123023_152126810_Ccnd1	chr7	152364916	152367915	3000
chr18_46886623_46889064_Cdo1	chr18	46754844	46757843	3000
chr6_4455175_4458605_Col1a2	chr6	4366890	4369889	3000
chr7_140205030_140208448_Ctbp2	chr7	140826739	140829738	3000
chr7_140314221_140317388_Ctbp2	chr7	140826804	140829803	3000
chr10_126485191_126488182_Cyp27b1	chr10	126363686	126366685	3000
chr10_96940927_96943536_Dcn	chr10	98726232	98729231	3000
chr6_6829460_6831986_Dlx5	chr6	6525723	6528722	3000
chr6_6813961_6817080_Dlx6	chr6	6526520	6529519	3000
chr1_164147278_164148832_Dnm3os	chr1	164251055	164254054	3000
chr11_44429866_44432944_Ebf1	chr11	46025405	46028404	3000
chr18_35019556_35021798_Egr1	chr18	35089677	35092676	3000
chr16_28443899_28448279_Fgf12	chr16	27389089	27392088	3000
chr14_58689528_58694260_Fgf9	chr14	59819894	59822893	3000
chr12_75007551_75011578_Hif1a	chr12	76409564	76412563	3000
chr15_102848536_102851167_Hoxc4	chr15	102944852	102947851	3000
chr2_74503399_74506910_Hoxd13	chr2	73365154	73368153	3000
chr2_74535540_74538148_Hoxd9	chr2	75539844	75542843	3000
chr7_149844910_149848135_Igf2	chr7	149664522	149667521	3000
chr17_25014180_25016935_Igfals	chr17	25967558	25970557	3000
chr8_87499950_87503039_Junb	chr8	87548494	87551493	3000
chr12_37833973_37836746_Meox2	chr12	37446360	37449359	3000
chr11_104410121_104412681_Myl4	chr11	106076401	106079400	3000
chr18_80907970_80911700_Nfatc1	chr18	80744835	80747834	3000
chr18_80907970_80911700_Nfatc1	chr18	80835835	80838834	3000
chr10_12809571_12811281_Plagl1	chr10	13043426	13046425	3000
chr2_30699700_30701855_Prrx2	chr2	30323778	30326777	3000
chr9_110643727_110647200_Pth1r	chr9	108686464	108689463	3000
chr11_98798642_98800671_Rara	chr11	99006656	99009655	3000
chr11_98821857_98823528_Rara	chr11	98786692	98789691	3000
chr2_27530691_27535014_Rxra	chr2	27612852	27615851	3000
chr3_66784461_66787957_Shox2	chr3	66377209	66380208	3000
chr4_154593802_154596613_Ski	chr4	154495208	154498207	3000
chr9_21420114_21421636_Smarca4	chr9	21600875	21603874	3000
chr6_52662811_52665204_Tax1bp1	chr6	52215008	52218007	3000
chr3_99058023_99061810_Tbx15	chr3	99043916	99046915	3000
chr5_120282740_120286014_Tbx5	chr5	120292377	120295376	3000
chr10_79894922_79897158_Tcf3	chr10	79868040	79871039	3000
chr6_72737065_72739646_Tcf7l1	chr6	72546356	72549355	3000
chr12_87417484_87420547_Tgfb3	chr12	87164016	87167015	3000
chr7_149626419_149629008_Tnni2	chr7	149673714	149676713	3000
chr9_66894122_66897762_Tpm1	chr9	67075942	67078941	3000
chr4_43534335_43537745_Tpm2	chr4	43572040	43575039	3000
chr15_50719712_50722752_Trps1	chr15	51667232	51670231	3000
chr13_89878065_89882877_Vcan	chr13	91232471	91235470	3000
chr15_66721970_66723921_Wisp1	chr15	68088946	68091945	3000
chr10_38882360_38884604_Wisp3	chr10	39252482	39255481	3000
chr12_110030583_110033282_Yy1	chr12	111722932	111725931	3000
chr6_83864154_83865978_Zfml	chr6	85401066	85404065	3000
chr18_14128669_14133943_Zfp521	chr18	13778306	13781305	3000
chr10_78559712_78561364_2610008E11Rik	chr10	78053538	78055537	2000
chr2_18599399_18601713_Bmi1	chr2	17965556	17967555	2000
chr16_15886577_15889028_Cebpd	chr16	14161802	14163801	2000
chr16_15886577_15889028_Cebpd	chr16	16302802	16304801	2000
chr15_97832813_97835758_Col2a1	chr15	97856286	97858285	2000
chr3_87751526_87754777_Crabp2	chr3	87762152	87764151	2000
chr6_117117047_117119951_Cxcl12	chr6	117868499	117870498	2000
chr10_126485191_126488182_Cyp27b1	chr10	128183686	128185685	2000
chr13_47199953_47203176_Dek	chr13	48964564	48966563	2000
chr1_164147278_164148832_Dnm3os	chr1	164234055	164236054	2000
chr13_30075516_30078226_E2f3	chr13	28510871	28512870	2000
chr15_81414980_81418011_Ep300	chr15	79518496	79520495	2000
chr15_81414980_81418011_Ep300	chr15	79964496	79966495	2000
chr15_81414980_81418011_Ep300	chr15	81296496	81298495	2000
chr2_74495971_74499159_Evx2	chr2	73747565	73749564	2000
chr13_119457951_119459272_Fgf10	chr13	120278612	120280611	2000
chr11_33044944_33049171_Fgf18	chr11	32354058	32356057	2000
chr7_152023302_152025900_Fgf3	chr7	150340601	150342600	2000
chr5_34062714_34066174_Fgfr3	chr5	35950444	35952443	2000
chr1_135933360_135936925_Fmod	chr1	135661142	135663141	2000
chr12_86812679_86816216_Fos	chr12	86797448	86799447	2000
chr1_180252359_180254574_Gm16586	chr1	180263466	180265465	2000
chr13_112278206_112281506_Gpbp1	chr13	110613856	110615855	2000
chr13_112278206_112281506_Gpbp1	chr13	111186856	111188855	2000
chr8_59799231_59802712_Hand2	chr8	59028972	59030971	2000
chr11_74982141_74984745_Hic1	chr11	74643443	74645442	2000
chr6_52211035_52213106_Hoxa13	chr6	52800070	52802069	2000
chr6_52211035_52213106_Hoxa13	chr6	52916070	52918069	2000
chr15_102795404_102798730_Hoxc10	chr15	103135067	103137066	2000
chr2_74528796_74531118_Hoxd10	chr2	75496957	75498956	2000
chr2_74528796_74531118_Hoxd10	chr2	75908957	75910956	2000
chr2_74517642_74520443_Hoxd11	chr2	75797042	75799041	2000
chr2_74511740_74514909_Hoxd12	chr2	73365324	73367323	2000
chr2_74503399_74506910_Hoxd13	chr2	73747154	73749153	2000
chr12_25778545_25781441_Id2	chr12	27079993	27081992	2000
chr7_148134123_148136461_Ifitm5	chr7	148227292	148229291	2000
chr7_149844910_149848135_Igf2	chr7	149740522	149742521	2000
chr4_118905023_118907974_Lepre1	chr4	120496498	120498497	2000
chr7_116312489_116314550_Lmo1	chr7	114806520	114808519	2000
chr2_33493858_33498287_Lmx1b	chr2	33488072	33490071	2000
chr1_127807483_127809680_Lypd1	chr1	128725582	128727581	2000
chr2_164228390_164231595_Matn4	chr2	163939992	163941991	2000
chr2_164228390_164231595_Matn4	chr2	163965992	163967991	2000
chr13_83662041_83665144_Mef2c	chr13	81922592	81924591	2000
chr11_104410121_104412681_Myl4	chr11	105042401	105044400	2000
chr10_127102912_127105995_Nab2	chr10	127079454	127081453	2000
chr10_127102912_127105995_Nab2	chr10	127774454	127776453	2000
chr18_80907970_80911700_Nfatc1	chr18	80762835	80764834	2000
chr18_80907970_80911700_Nfatc1	chr18	80819835	80821834	2000
chr18_80907970_80911700_Nfatc1	chr18	80832835	80834834	2000
chr14_56442510_56445943_Nfatc4	chr14	56474226	56476225	2000
chr19_46378354_46380862_Nfkb2	chr19	45129608	45131607	2000
chr11_70467133_70469959_Pfn1	chr11	69208546	69210545	2000
chr11_70467133_70469959_Pfn1	chr11	70482546	70484545	2000
chr11_70467133_70469959_Pfn1	chr11	72027546	72029545	2000
chr17_24685553_24689486_Pkd1	chr17	24767520	24769519	2000
chr2_30699700_30701855_Prrx2	chr2	30293778	30295777	2000
chr13_63665654_63670664_Ptch1	chr13	63916159	63918158	2000
chr13_63665654_63670664_Ptch1	chr13	64019159	64021158	2000
chr19_5636396_5639143_Rela	chr19	5688770	5690769	2000
chr12_110837272_110841113_Rtl1	chr12	110673192	110675191	2000
chr6_88414920_88416449_Ruvbl1	chr6	86426684	86428683	2000
chr19_42275351_42278258_Sfrp5	chr19	43460804	43462803	2000
chr4_154593802_154596613_Ski	chr4	154488208	154490207	2000
chr4_154593802_154596613_Ski	chr4	154523208	154525207	2000
chr18_76399843_76403469_Smad2	chr18	78012656	78014655	2000
chr17_25706361_25708800_Sox8	chr17	27559580	27561579	2000
chr19_46470246_46472935_Sufu	chr19	45086590	45088589	2000
chr18_60782378_60785115_Synpo	chr18	60804746	60806745	2000
chr18_60782378_60785115_Synpo	chr18	60814746	60816745	2000
chr18_60782378_60785115_Synpo	chr18	60828746	60830745	2000
chr7_26471403_26474526_Tgfb1	chr7	28016964	28018963	2000
chr5_107716267_107719381_Tgfbr3	chr5	107577824	107579823	2000
chr14_32020383_32023474_Tnnc1	chr14	32063928	32065927	2000
chr7_149626419_149629008_Tnni2	chr7	149640714	149642713	2000
chr7_149626419_149629008_Tnni2	chr7	149664714	149666713	2000
chr7_149626419_149629008_Tnni2	chr7	149714714	149716713	2000
chr7_149626419_149629008_Tnni2	chr7	149721714	149723713	2000
chr7_149626419_149629008_Tnni2	chr7	149724714	149726713	2000
chr7_149626419_149629008_Tnni2	chr7	149730714	149732713	2000
chr7_4464872_4466692_Tnnt1	chr7	3290782	3292781	2000
chr7_4464872_4466692_Tnnt1	chr7	3580782	3582781	2000
chr17_25409415_25412199_Ube2i	chr17	25921807	25923806	2000
chr17_46165116_46169966_Vegfa	chr17	45822541	45824540	2000
chr10_38882360_38884604_Wisp3	chr10	36912482	36914481	2000
chr14_29317453_29320874_Wnt5a	chr14	30780164	30782163	2000
chr11_59118966_59122269_Wnt9a	chr11	59208618	59210617	2000
chr12_110030583_110033282_Yy1	chr12	110647932	110649931	2000
chr7_30879614_30880927_Zfp260	chr7	29735270	29737269	2000
chr4_34829007_34832392_Zfp292	chr4	33332700	33334699	2000
chr10_81022383_81023877_Aes	chr10	82154130	82155129	1000
chr2_73728822_73731611_Atf2	chr2	74489216	74490215	1000
chr2_73728822_73731611_Atf2	chr2	74526216	74527215	1000
chr2_73728822_73731611_Atf2	chr2	75540216	75541215	1000
chr15_80084611_80087550_Atf4	chr15	80065080	80066079	1000
chr15_80084611_80087550_Atf4	chr15	80629080	80630079	1000
chr2_18599399_18601713_Bmi1	chr2	17963556	17964555	1000
chr8_107693938_107696394_Cbfb	chr8	107750166	107751165	1000
chr7_152123023_152126810_Ccnd1	chr7	151016916	151017915	1000
chr7_152123023_152126810_Ccnd1	chr7	152392916	152393915	1000
chr7_152123023_152126810_Ccnd1	chr7	152516916	152517915	1000
chr16_15886577_15889028_Cebpd	chr16	14938802	14939801	1000
chr16_15886577_15889028_Cebpd	chr16	14940802	14941801	1000
chr6_4455175_4458605_Col1a2	chr6	5341890	5342889	1000
chr8_72895934_72899081_Comp	chr8	73031508	73032507	1000
chr16_4211629_4215253_Crebbp	chr16	4077441	4078440	1000
chr1_75355432_75357954_Des	chr1	75432693	75433692	1000
chr1_164147278_164148832_Dnm3os	chr1	163901055	163902054	1000
chr1_164147278_164148832_Dnm3os	chr1	163917055	163918054	1000
chr1_164147278_164148832_Dnm3os	chr1	164008055	164009054	1000
chr1_164147278_164148832_Dnm3os	chr1	164010055	164011054	1000
chr1_164147278_164148832_Dnm3os	chr1	164022055	164023054	1000
chr1_164147278_164148832_Dnm3os	chr1	164262055	164263054	1000
chr14_67851751_67855038_Ebf2	chr14	68333394	68334393	1000
chr14_79880050_79882900_Elf1	chr14	79986475	79987474	1000
chr2_74495971_74499159_Evx2	chr2	73367565	73368564	1000
chr1_14297789_14300826_Eya1	chr1	16091308	16092307	1000
chr13_119501869_119505236_Fgf10	chr13	120196552	120197551	1000
chr7_152046111_152048940_Fgf4	chr7	150194526	150195525	1000
chr8_26628987_26631865_Fgfr1	chr8	26548426	26549425	1000
chr12_86812679_86816216_Fos	chr12	86713448	86714447	1000
chr19_5447409_5449287_Fosl1	chr19	5427348	5428347	1000
chr2_113596869_113600677_Grem1	chr2	112206773	112207772	1000
chr16_38087970_38092456_Gsk3b	chr16	37683213	37684212	1000
chr16_38087970_38092456_Gsk3b	chr16	37868213	37869212	1000
chr8_59799231_59802712_Hand2	chr8	59807972	59808971	1000
chr10_119910594_119913110_Hmga2	chr10	119709852	119710851	1000
chr10_119910594_119913110_Hmga2	chr10	120288852	120289851	1000
chr6_52195252_52198732_Hoxa11	chr6	52799992	52800991	1000
chr6_52211035_52213106_Hoxa13	chr6	51129070	51130069	1000
chr11_96054140_96056361_Hoxb13	chr11	96836250	96837249	1000
chr15_102795404_102798730_Hoxc10	chr15	103138067	103139066	1000
chr15_102784024_102787175_Hoxc11	chr15	103132600	103133599	1000
chr15_102784024_102787175_Hoxc11	chr15	103135600	103136599	1000
chr15_102848536_102851167_Hoxc4	chr15	103133852	103134851	1000
chr15_102805257_102807929_Hoxc9	chr15	103137593	103138592	1000
chr2_74528796_74531118_Hoxd10	chr2	75906957	75907956	1000
chr2_74517642_74520443_Hoxd11	chr2	73322042	73323041	1000
chr2_74517642_74520443_Hoxd11	chr2	73748042	73749041	1000
chr2_74517642_74520443_Hoxd11	chr2	75800042	75801041	1000
chr2_74511740_74514909_Hoxd12	chr2	73747324	73748323	1000
chr2_74511740_74514909_Hoxd12	chr2	75539324	75540323	1000
chr7_149844910_149848135_Igf2	chr7	149624522	149625521	1000
chr7_149844910_149848135_Igf2	chr7	149781522	149782521	1000
chr13_16102561_16105504_Inhba	chr13	17787032	17788031	1000
chr8_87499950_87503039_Junb	chr8	86725494	86726493	1000
chr8_87499950_87503039_Junb	chr8	87369494	87370493	1000
chr4_55543909_55546908_Klf4	chr4	55660408	55661407	1000
chr3_130812216_130815371_Lef1	chr3	129235794	129236793	1000
chr1_182821900_182824343_Lefty2	chr1	184449122	184450121	1000
chr4_118905023_118907974_Lepre1	chr4	120487498	120488497	1000
chr2_91296389_91299367_Lrp4	chr2	91105878	91106877	1000
chr13_83662041_83665144_Mef2c	chr13	81795592	81796591	1000
chr11_18917640_18921970_Meis1	chr11	17059805	17060804	1000
chr11_101752673_101755867_Meox1	chr11	101692270	101693269	1000
chr12_37833973_37836746_Meox2	chr12	37042360	37043359	1000
chr12_37833973_37836746_Meox2	chr12	37044360	37045359	1000
chr7_142906276_142909505_Mki67	chr7	144506890	144507889	1000
chr14_55612678_55614766_Myh7	chr14	55546722	55547721	1000
chr7_134353601_134355810_Mylpf	chr7	134375706	134376705	1000
chr10_127102912_127105995_Nab2	chr10	127472454	127473453	1000
chr2_155297867_155299083_Ncoa6	chr2	157258475	157259474	1000
chr18_80907970_80911700_Nfatc1	chr18	80760835	80761834	1000
chr8_87320883_87323459_Nfix	chr8	87296171	87297170	1000
chr8_87320883_87323459_Nfix	chr8	87298171	87299170	1000
chr1_93354150_93356697_Per2	chr1	93859424	93860423	1000
chr11_70467133_70469959_Pfn1	chr11	68885546	68886545	1000
chr11_70467133_70469959_Pfn1	chr11	69224546	69225545	1000
chr10_12809571_12811281_Plagl1	chr10	13095426	13096425	1000
chr17_21080536_21083642_Ppp2r1a	chr17	21669089	21670088	1000
chr2_30699700_30701855_Prrx2	chr2	30273778	30274777	1000
chr11_106116504_106117972_Psmc5	chr11	105145238	105146237	1000
chr11_106116504_106117972_Psmc5	chr11	106077238	106078237	1000
chr11_106116504_106117972_Psmc5	chr11	106079238	106080237	1000
chr11_98798642_98800671_Rara	chr11	98996656	98997655	1000
chr11_98821857_98823528_Rara	chr11	97559692	97560691	1000
chr9_108207401_108210367_Rhoa	chr9	108382884	108383883	1000
chr2_51927686_51930368_Rif1	chr2	51001027	51002026	1000
chr2_53936670_53939178_Rprm	chr2	53047924	53048923	1000
chr12_110837272_110841113_Rtl1	chr12	110652192	110653191	1000
chr12_110837272_110841113_Rtl1	chr12	110656192	110657191	1000
chr6_88414920_88416449_Ruvbl1	chr6	86424684	86425683	1000
chr6_88414920_88416449_Ruvbl1	chr6	86430684	86431683	1000
chr2_27530691_27535014_Rxra	chr2	27601852	27602851	1000
chr19_42275351_42278258_Sfrp5	chr19	44209804	44210803	1000
chr4_154593802_154596613_Ski	chr4	154612208	154613207	1000
chr9_21420114_21421636_Smarca4	chr9	21350875	21351874	1000
chr6_144155558_144157976_Sox5	chr6	143479767	143480766	1000
chr7_123174364_123178112_Sox6	chr7	122767238	122768237	1000
chr2_72814956_72817313_Sp3	chr2	72885134	72886133	1000
chr2_72814956_72817313_Sp3	chr2	72887134	72888133	1000
chr14_106295079_106298486_Spry2	chr14	105573782	105574781	1000
chr6_52662811_52665204_Tax1bp1	chr6	52202008	52203007	1000
chr3_99058023_99061810_Tbx15	chr3	99734916	99735915	1000
chr3_99058023_99061810_Tbx15	chr3	100724916	100725915	1000
chr5_120282740_120286014_Tbx5	chr5	120290377	120291376	1000
chr7_133923872_133926827_Tbx6	chr7	134163350	134164349	1000
chr7_133923872_133926827_Tbx6	chr7	134165350	134166349	1000
chr18_69502950_69505851_Tcf4	chr18	68869400	68870399	1000
chr6_72737065_72739646_Tcf7l1	chr6	72626356	72627355	1000
chr6_72737065_72739646_Tcf7l1	chr6	72628356	72629355	1000
chr6_72737065_72739646_Tcf7l1	chr6	72659356	72660355	1000
chr19_55815031_55819344_Tcf7l2	chr19	56250188	56251187	1000
chr1_19197687_19200253_Tfap2b	chr1	21064970	21065969	1000
chr8_13337175_13340621_Tfdp1	chr8	13756898	13757897	1000
chr7_26471403_26474526_Tgfb1	chr7	28271964	28272963	1000
chr7_26471403_26474526_Tgfb1	chr7	28273964	28274963	1000
chr13_56710029_56712867_Tgfbi	chr13	56685448	56686447	1000
chr5_107716267_107719381_Tgfbr3	chr5	106144824	106145823	1000
chr5_107716267_107719381_Tgfbr3	chr5	107588824	107589823	1000
chr14_78705549_78708094_Tnfsf11	chr14	77205822	77206821	1000
chr14_78705549_78708094_Tnfsf11	chr14	77209822	77210821	1000
chr7_149626419_149629008_Tnni2	chr7	149659714	149660713	1000
chr7_149626419_149629008_Tnni2	chr7	149728714	149729713	1000
chr7_4464872_4466692_Tnnt1	chr7	3288782	3289781	1000
chr15_98763803_98766015_Tuba1b	chr15	98698909	98699908	1000
chr15_98763803_98766015_Tuba1b	chr15	98700909	98701908	1000
chr15_98763803_98766015_Tuba1b	chr15	98813909	98814908	1000
chr13_89878065_89882877_Vcan	chr13	90229471	90230470	1000
chr15_66721970_66723921_Wisp1	chr15	66510946	66511945	1000
chr15_66721970_66723921_Wisp1	chr15	66512946	66513945	1000
chr11_59103743_59106479_Wnt3a	chr11	59320111	59321110	1000

## Sheet: HL_E13.5
viewpoint	chrom	start	end	width
chr1_164147278_164148832_Dnm3os	chr1	163927055	163957054	30000
chr3_29908469_29911947_Mecom	chr3	30401208	30416207	15000
chr8_87320883_87323459_Nfix	chr8	87261171	87276170	15000
chr2_18599399_18601713_Bmi1	chr2	17969556	17981555	12000
chr6_52195252_52198732_Hoxa11	chr6	51115992	51125991	10000
chr1_164147278_164148832_Dnm3os	chr1	163913055	163922054	9000
chr6_52211035_52213106_Hoxa13	chr6	51117070	51126069	9000
chr11_74982141_74984745_Hic1	chr11	74824443	74832442	8000
chr8_87320883_87323459_Nfix	chr8	87241171	87249170	8000
chr7_149844910_149848135_Igf2	chr7	149615522	149622521	7000
chr2_33493858_33498287_Lmx1b	chr2	33569072	33576071	7000
chr18_80907970_80911700_Nfatc1	chr18	80832835	80839834	7000
chr15_50719712_50722752_Trps1	chr15	51626232	51633231	7000
chr2_18599399_18601713_Bmi1	chr2	17946556	17952555	6000
chr11_94796731_94799690_Col1a1	chr11	94740210	94746209	6000
chr1_164147278_164148832_Dnm3os	chr1	163905055	163911054	6000
chr1_164147278_164148832_Dnm3os	chr1	164060055	164066054	6000
chr1_164147278_164148832_Dnm3os	chr1	164232055	164238054	6000
chr8_87499950_87503039_Junb	chr8	86703494	86709493	6000
chr6_72737065_72739646_Tcf7l1	chr6	72602356	72608355	6000
chr7_149626419_149629008_Tnni2	chr7	149725714	149731713	6000
chr15_98763803_98766015_Tuba1b	chr15	98818909	98824908	6000
chr2_18599399_18601713_Bmi1	chr2	17962556	17967555	5000
chr7_152123023_152126810_Ccnd1	chr7	152363916	152368915	5000
chr7_152123023_152126810_Ccnd1	chr7	152378916	152383915	5000
chr16_15886577_15889028_Cebpd	chr16	14703802	14708801	5000
chr11_94796731_94799690_Col1a1	chr11	94732210	94737209	5000
chr1_164147278_164148832_Dnm3os	chr1	163972055	163977054	5000
chr1_164147278_164148832_Dnm3os	chr1	164008055	164013054	5000
chr1_164147278_164148832_Dnm3os	chr1	164052055	164057054	5000
chr1_164147278_164148832_Dnm3os	chr1	164241055	164246054	5000
chr10_119910594_119913110_Hmga2	chr10	120285852	120290851	5000
chr15_102795404_102798730_Hoxc10	chr15	103134067	103139066	5000
chr15_102805257_102807929_Hoxc9	chr15	102777593	102782592	5000
chr2_74511740_74514909_Hoxd12	chr2	73321324	73326323	5000
chr14_56442510_56445943_Nfatc4	chr14	56469226	56474225	5000
chr8_87320883_87323459_Nfix	chr8	87233171	87238170	5000
chr4_154593802_154596613_Ski	chr4	154547208	154552207	5000
chr15_98763803_98766015_Tuba1b	chr15	96828909	96833908	5000
chr7_30879614_30880927_Zfp260	chr7	29738270	29743269	5000
chr15_101004077_101006768_Acvr1b	chr15	99649422	99653421	4000
chr15_101004077_101006768_Acvr1b	chr15	101805422	101809421	4000
chr15_101004077_101006768_Acvr1b	chr15	101928422	101932421	4000
chr2_73728822_73731611_Atf2	chr2	74499216	74503215	4000
chr15_80084611_80087550_Atf4	chr15	80538080	80542079	4000
chr7_152123023_152126810_Ccnd1	chr7	152390916	152394915	4000
chr7_140205030_140208448_Ctbp2	chr7	140826739	140830738	4000
chr10_126485191_126488182_Cyp27b1	chr10	125222686	125226685	4000
chr1_164147278_164148832_Dnm3os	chr1	163982055	163986054	4000
chr1_164147278_164148832_Dnm3os	chr1	164250055	164254054	4000
chr1_77510639_77513124_Epha4	chr1	75827882	75831881	4000
chr1_135933360_135936925_Fmod	chr1	135639142	135643141	4000
chr12_86812679_86816216_Fos	chr12	86795448	86799447	4000
chr18_9211622_9214739_Fzd8	chr18	8643180	8647179	4000
chr1_120948787_120951013_Gli2	chr1	120719900	120723899	4000
chr2_74517642_74520443_Hoxd11	chr2	75907042	75911041	4000
chr2_74535540_74538148_Hoxd9	chr2	75796844	75800843	4000
chr2_74535540_74538148_Hoxd9	chr2	75906844	75910843	4000
chr2_152561579_152563298_Id1	chr2	152531438	152535437	4000
chr7_75095274_75099424_Igf1r	chr7	75272349	75276348	4000
chr7_149844910_149848135_Igf2	chr7	149729522	149733521	4000
chr18_80907970_80911700_Nfatc1	chr18	80819835	80823834	4000
chr18_80907970_80911700_Nfatc1	chr18	80825835	80829834	4000
chr13_55931559_55934572_Pitx1	chr13	56061066	56065065	4000
chr2_30699700_30701855_Prrx2	chr2	30293778	30297777	4000
chr2_30699700_30701855_Prrx2	chr2	30690778	30694777	4000
chr13_63665654_63670664_Ptch1	chr13	64017159	64021158	4000
chr3_115416570_115419596_S1pr1	chr3	113733083	113737082	4000
chr3_66784461_66787957_Shox2	chr3	66375209	66379208	4000
chr4_154593802_154596613_Ski	chr4	154482208	154486207	4000
chr4_154593802_154596613_Ski	chr4	154515208	154519207	4000
chr9_63867549_63870701_Smad6	chr9	63805125	63809124	4000
chr14_106295079_106298486_Spry2	chr14	105725782	105729781	4000
chr17_8564620_8566874_T2	chr17	10526747	10530746	4000
chr6_52662811_52665204_Tax1bp1	chr6	51121008	51125007	4000
chr6_52662811_52665204_Tax1bp1	chr6	52199008	52203007	4000
chr3_21973234_21977082_Tbl1xr1	chr3	21833158	21837157	4000
chr7_133923872_133926827_Tbx6	chr7	133933350	133937349	4000
chr18_69502950_69505851_Tcf4	chr18	69755400	69759399	4000
chr6_72737065_72739646_Tcf7l1	chr6	72564356	72568355	4000
chr7_149626419_149629008_Tnni2	chr7	149715714	149719713	4000
chr7_149626419_149629008_Tnni2	chr7	149762714	149766713	4000
chr18_14128669_14133943_Zfp521	chr18	13778306	13782305	4000
chr10_81022383_81023877_Aes	chr10	81066130	81069129	3000
chr8_107693938_107696394_Cbfb	chr8	107748166	107751165	3000
chr18_46886623_46889064_Cdo1	chr18	46754844	46757843	3000
chr16_15886577_15889028_Cebpd	chr16	15053802	15056801	3000
chr16_20731852_20734764_Chrd	chr16	21209308	21212307	3000
chr3_87751526_87754777_Crabp2	chr3	87761152	87764151	3000
chr7_140314221_140317388_Ctbp2	chr7	140826804	140829803	3000
chr1_164147278_164148832_Dnm3os	chr1	163964055	163967054	3000
chr1_164147278_164148832_Dnm3os	chr1	164022055	164025054	3000
chr18_35019556_35021798_Egr1	chr18	35721677	35724676	3000
chr18_35019556_35021798_Egr1	chr18	35757677	35760676	3000
chr14_79880050_79882900_Elf1	chr14	79986475	79989474	3000
chr7_137406004_137410493_Fgfr2	chr7	136821248	136824247	3000
chr19_5447409_5449287_Fosl1	chr19	4191348	4194347	3000
chr13_15553739_15557248_Gli3	chr13	15144494	15147493	3000
chr10_119910594_119913110_Hmga2	chr10	119707852	119710851	3000
chr10_119910594_119913110_Hmga2	chr10	120155852	120158851	3000
chr10_119910594_119913110_Hmga2	chr10	120293852	120296851	3000
chr6_52195252_52198732_Hoxa11	chr6	52787992	52790991	3000
chr6_52195252_52198732_Hoxa11	chr6	52874992	52877991	3000
chr6_52211035_52213106_Hoxa13	chr6	52788070	52791069	3000
chr6_52211035_52213106_Hoxa13	chr6	52810070	52813069	3000
chr15_102795404_102798730_Hoxc10	chr15	102776067	102779066	3000
chr15_102784024_102787175_Hoxc11	chr15	102777600	102780599	3000
chr15_102784024_102787175_Hoxc11	chr15	103134600	103137599	3000
chr2_74517642_74520443_Hoxd11	chr2	73365042	73368041	3000
chr2_152561579_152563298_Id1	chr2	152654438	152657437	3000
chr7_149844910_149848135_Igf2	chr7	149706522	149709521	3000
chr4_55543909_55546908_Klf4	chr4	55660408	55663407	3000
chr2_33493858_33498287_Lmx1b	chr2	33488072	33491071	3000
chr3_29908469_29911947_Mecom	chr3	30117208	30120207	3000
chr12_37833973_37836746_Meox2	chr12	37445360	37448359	3000
chr7_142906276_142909505_Mki67	chr7	144509890	144512889	3000
chr12_9580219_9583266_Osr1	chr12	10577742	10580741	3000
chr2_30699700_30701855_Prrx2	chr2	32389778	32392777	3000
chr11_106116504_106117972_Psmc5	chr11	104300238	104303237	3000
chr19_5636396_5639143_Rela	chr19	5607770	5610769	3000
chr11_29447027_29448915_Rps27a	chr11	30095971	30098970	3000
chr4_154593802_154596613_Ski	chr4	154523208	154526207	3000
chr9_63867549_63870701_Smad6	chr9	63828125	63831124	3000
chr18_75525548_75529772_Smad7	chr18	75652660	75655659	3000
chr6_52662811_52665204_Tax1bp1	chr6	52216008	52219007	3000
chr7_133923872_133926827_Tbx6	chr7	134337350	134340349	3000
chr18_69751407_69754269_Tcf4	chr18	69509838	69512837	3000
chr7_26471403_26474526_Tgfb1	chr7	28376964	28379963	3000
chr5_107716267_107719381_Tgfbr3	chr5	107578824	107581823	3000
chr7_149626419_149629008_Tnni2	chr7	149747714	149750713	3000
chr7_149626419_149629008_Tnni2	chr7	149753714	149756713	3000
chr7_4464872_4466692_Tnnt1	chr7	3288782	3291781	3000
chr17_46165116_46169966_Vegfa	chr17	45871541	45874540	3000
chr14_29317453_29320874_Wnt5a	chr14	28601164	28604163	3000
chr6_119492709_119495777_Wnt5b	chr6	118510243	118513242	3000
chr18_5591240_5594740_Zeb1	chr18	4517990	4520989	3000
chr7_30879614_30880927_Zfp260	chr7	29732270	29735269	3000
chr18_14128669_14133943_Zfp521	chr18	13759306	13762305	3000
chr10_78559712_78561364_2610008E11Rik	chr10	78035538	78037537	2000
chr10_78559712_78561364_2610008E11Rik	chr10	78053538	78055537	2000
chr15_80084611_80087550_Atf4	chr15	80629080	80631079	2000
chr15_80084611_80087550_Atf4	chr15	81229080	81231079	2000
chr17_26273981_26276763_Axin1	chr17	28142372	28144371	2000
chr17_26273981_26276763_Axin1	chr17	28150372	28152371	2000
chr16_19759451_19762171_B3gnt5	chr16	18497811	18499810	2000
chr2_18599399_18601713_Bmi1	chr2	17985556	17987555	2000
chr2_172763233_172766213_Bmp7	chr2	173881723	173883722	2000
chr1_59819819_59822208_Bmpr2	chr1	58502014	58504013	2000
chr7_152123023_152126810_Ccnd1	chr7	150192916	150194915	2000
chr18_46886623_46889064_Cdo1	chr18	46832844	46834843	2000
chr16_15886577_15889028_Cebpd	chr16	16302802	16304801	2000
chr2_125682481_125687041_Cops2	chr2	126276761	126278760	2000
chr10_126485191_126488182_Cyp27b1	chr10	126417686	126419685	2000
chr13_47199953_47203176_Dek	chr13	48964564	48966563	2000
chr1_164147278_164148832_Dnm3os	chr1	163900055	163902054	2000
chr14_67851751_67855038_Ebf2	chr14	68230394	68232393	2000
chr10_66998706_67001124_Egr2	chr10	67741915	67743914	2000
chr11_33044944_33049171_Fgf18	chr11	32352058	32354057	2000
chr7_152023302_152025900_Fgf3	chr7	150573601	150575600	2000
chr8_26628987_26631865_Fgfr1	chr8	28216426	28218425	2000
chr14_73108094_73111002_Fndc3a	chr14	73001548	73003547	2000
chr19_5447409_5449287_Fosl1	chr19	5473348	5475347	2000
chr5_4756129_4759451_Fzd1	chr5	4484790	4486789	2000
chr18_9211622_9214739_Fzd8	chr18	7869180	7871179	2000
chr5_135724445_135727028_Fzd9	chr5	135749736	135751735	2000
chr5_135724445_135727028_Fzd9	chr5	137339736	137341735	2000
chr8_59799231_59802712_Hand2	chr8	59028972	59030971	2000
chr11_74982141_74984745_Hic1	chr11	74888443	74890442	2000
chr6_52195252_52198732_Hoxa11	chr6	50952992	50954991	2000
chr6_52211035_52213106_Hoxa13	chr6	50615070	50617069	2000
chr6_52211035_52213106_Hoxa13	chr6	52800070	52802069	2000
chr6_52211035_52213106_Hoxa13	chr6	52916070	52918069	2000
chr15_102795404_102798730_Hoxc10	chr15	103117067	103119066	2000
chr15_102848536_102851167_Hoxc4	chr15	102945852	102947851	2000
chr15_102805257_102807929_Hoxc9	chr15	103136593	103138592	2000
chr2_74528796_74531118_Hoxd10	chr2	75496957	75498956	2000
chr2_74528796_74531118_Hoxd10	chr2	75540957	75542956	2000
chr2_74528796_74531118_Hoxd10	chr2	75795957	75797956	2000
chr2_74528796_74531118_Hoxd10	chr2	75906957	75908956	2000
chr2_74517642_74520443_Hoxd11	chr2	75796042	75798041	2000
chr2_74511740_74514909_Hoxd12	chr2	73366324	73368323	2000
chr2_74511740_74514909_Hoxd12	chr2	73747324	73749323	2000
chr2_74503399_74506910_Hoxd13	chr2	73747154	73749153	2000
chr12_25778545_25781441_Id2	chr12	26216993	26218992	2000
chr12_25778545_25781441_Id2	chr12	27077993	27079992	2000
chr7_149844910_149848135_Igf2	chr7	149639522	149641521	2000
chr7_149844910_149848135_Igf2	chr7	149666522	149668521	2000
chr7_149844910_149848135_Igf2	chr7	149712522	149714521	2000
chr13_83662041_83665144_Mef2c	chr13	81922592	81924591	2000
chr11_18917640_18921970_Meis1	chr11	17111805	17113804	2000
chr11_101752673_101755867_Meox1	chr11	101691270	101693269	2000
chr6_136821716_136825058_Mgp	chr6	135199387	135201386	2000
chr10_127102912_127105995_Nab2	chr10	127472454	127474453	2000
chr10_127102912_127105995_Nab2	chr10	128183454	128185453	2000
chr18_80907970_80911700_Nfatc1	chr18	80744835	80746834	2000
chr11_70467133_70469959_Pfn1	chr11	69806546	69808545	2000
chr11_70467133_70469959_Pfn1	chr11	70481546	70483545	2000
chr13_55931559_55934572_Pitx1	chr13	56256066	56258065	2000
chr17_21080536_21083642_Ppp2r1a	chr17	21704089	21706088	2000
chr2_30699700_30701855_Prrx2	chr2	30324778	30326777	2000
chr11_98821857_98823528_Rara	chr11	99009692	99011691	2000
chr2_53936670_53939178_Rprm	chr2	53048924	53050923	2000
chr8_91564336_91569242_Sall1	chr8	93384789	93386788	2000
chr8_91564336_91569242_Sall1	chr8	93392789	93394788	2000
chr18_76399843_76403469_Smad2	chr18	77181656	77183655	2000
chr9_63867549_63870701_Smad6	chr9	62956125	62958124	2000
chr12_28025698_28028497_Sox11	chr12	27872098	27874097	2000
chr14_106295079_106298486_Spry2	chr14	105574782	105576781	2000
chr14_106295079_106298486_Spry2	chr14	106130782	106132781	2000
chr18_60782378_60785115_Synpo	chr18	60804746	60806745	2000
chr18_60782378_60785115_Synpo	chr18	60828746	60830745	2000
chr18_60782378_60785115_Synpo	chr18	60831746	60833745	2000
chr6_52662811_52665204_Tax1bp1	chr6	52169008	52171007	2000
chr11_85644477_85646356_Tbx2	chr11	87236416	87238415	2000
chr6_72737065_72739646_Tcf7l1	chr6	72628356	72630355	2000
chr7_149626419_149629008_Tnni2	chr7	149692714	149694713	2000
chr7_149626419_149629008_Tnni2	chr7	149712714	149714713	2000
chr7_4464872_4466692_Tnnt1	chr7	3596782	3598781	2000
chr9_66894122_66897762_Tpm1	chr9	67026942	67028941	2000
chr4_43534335_43537745_Tpm2	chr4	43573040	43575039	2000
chr15_50719712_50722752_Trps1	chr15	51335232	51337231	2000
chr15_98763803_98766015_Tuba1b	chr15	98699909	98701908	2000
chr10_38882360_38884604_Wisp3	chr10	39252482	39254481	2000
chr4_136832571_136834778_Wnt4	chr4	138821674	138823673	2000
chr18_14128669_14133943_Zfp521	chr18	13756306	13758305	2000
chr10_78559712_78561364_2610008E11Rik	chr10	76978538	76979537	1000
chr15_101004077_101006768_Acvr1b	chr15	102082422	102083421	1000
chr10_81022383_81023877_Aes	chr10	79579130	79580129	1000
chr15_80084611_80087550_Atf4	chr15	79519080	79520079	1000
chr2_18599399_18601713_Bmi1	chr2	17983556	17984555	1000
chr1_59819819_59822208_Bmpr2	chr1	58478014	58479013	1000
chr1_59819819_59822208_Bmpr2	chr1	58771014	58772013	1000
chr7_35902387_35905796_Cebpa	chr7	35173092	35174091	1000
chr16_15886577_15889028_Cebpd	chr16	14892802	14893801	1000
chr17_25269574_25272870_Clcn7	chr17	25322222	25323221	1000
chr15_97832813_97835758_Col2a1	chr15	97857286	97858285	1000
chr2_125682481_125687041_Cops2	chr2	126500761	126501760	1000
chr9_54611791_54613863_Crabp1	chr9	54650827	54651826	1000
chr9_120841457_120844370_Ctnnb1	chr9	118886914	118887913	1000
chr6_117117047_117119951_Cxcl12	chr6	117867499	117868498	1000
chr6_84534909_84538416_Cyp26b1	chr6	84083662	84084661	1000
chr10_126485191_126488182_Cyp27b1	chr10	126420686	126421685	1000
chr10_126485191_126488182_Cyp27b1	chr10	127773686	127774685	1000
chr2_71383014_71385729_Dlx2	chr2	73320372	73321371	1000
chr1_164147278_164148832_Dnm3os	chr1	162965055	162966054	1000
chr1_164147278_164148832_Dnm3os	chr1	162968055	162969054	1000
chr1_164147278_164148832_Dnm3os	chr1	163970055	163971054	1000
chr1_164147278_164148832_Dnm3os	chr1	164067055	164068054	1000
chr1_164147278_164148832_Dnm3os	chr1	164087055	164088054	1000
chr16_20516628_20519070_Dvl3	chr16	18810849	18811848	1000
chr11_44429866_44432944_Ebf1	chr11	46025405	46026404	1000
chr10_66998706_67001124_Egr2	chr10	66384915	66385914	1000
chr2_74495971_74499159_Evx2	chr2	73747565	73748564	1000
chr2_74495971_74499159_Evx2	chr2	74524565	74525564	1000
chr1_14297789_14300826_Eya1	chr1	12685308	12686307	1000
chr13_119457951_119459272_Fgf10	chr13	120279612	120280611	1000
chr13_119501869_119505236_Fgf10	chr13	117811552	117812551	1000
chr13_119501869_119505236_Fgf10	chr13	117814552	117815551	1000
chr13_119501869_119505236_Fgf10	chr13	120277552	120278551	1000
chr13_119501869_119505236_Fgf10	chr13	120279552	120280551	1000
chr16_28443899_28448279_Fgf12	chr16	27390089	27391088	1000
chr11_33044944_33049171_Fgf18	chr11	32248058	32249057	1000
chr11_33044944_33049171_Fgf18	chr11	32540058	32541057	1000
chr14_58689528_58694260_Fgf9	chr14	59819894	59820893	1000
chr14_58689528_58694260_Fgf9	chr14	59821894	59822893	1000
chr8_26628987_26631865_Fgfr1	chr8	26550426	26551425	1000
chr1_135933360_135936925_Fmod	chr1	135590142	135591141	1000
chr12_86812679_86816216_Fos	chr12	86713448	86714447	1000
chr5_32434356_32436464_Fosl2	chr5	31827410	31828409	1000
chr1_180252359_180254574_Gm16586	chr1	180264466	180265465	1000
chr13_112278206_112281506_Gpbp1	chr13	110609856	110610855	1000
chr13_112278206_112281506_Gpbp1	chr13	111186856	111187855	1000
chr8_83016074_83018469_Gypa	chr8	82235272	82236271	1000
chr11_74982141_74984745_Hic1	chr11	74642443	74643442	1000
chr11_74982141_74984745_Hic1	chr11	74644443	74645442	1000
chr11_74982141_74984745_Hic1	chr11	74859443	74860442	1000
chr10_119910594_119913110_Hmga2	chr10	120153852	120154851	1000
chr6_52195252_52198732_Hoxa11	chr6	50930992	50931991	1000
chr6_52195252_52198732_Hoxa11	chr6	51016992	51017991	1000
chr6_52195252_52198732_Hoxa11	chr6	52201992	52202991	1000
chr6_52195252_52198732_Hoxa11	chr6	52799992	52800991	1000
chr11_96131619_96133714_Hoxb9	chr11	96837666	96838665	1000
chr15_102784024_102787175_Hoxc11	chr15	102775600	102776599	1000
chr15_102848536_102851167_Hoxc4	chr15	102776852	102777851	1000
chr15_102848536_102851167_Hoxc4	chr15	102943852	102944851	1000
chr15_102805257_102807929_Hoxc9	chr15	102775593	102776592	1000
chr15_102805257_102807929_Hoxc9	chr15	102792593	102793592	1000
chr15_102805257_102807929_Hoxc9	chr15	102946593	102947592	1000
chr15_102805257_102807929_Hoxc9	chr15	103129593	103130592	1000
chr15_102805257_102807929_Hoxc9	chr15	103133593	103134592	1000
chr2_74528796_74531118_Hoxd10	chr2	73331957	73332956	1000
chr2_74528796_74531118_Hoxd10	chr2	73747957	73748956	1000
chr2_74528796_74531118_Hoxd10	chr2	75799957	75800956	1000
chr2_74528796_74531118_Hoxd10	chr2	75827957	75828956	1000
chr2_74517642_74520443_Hoxd11	chr2	73748042	73749041	1000
chr2_74511740_74514909_Hoxd12	chr2	75909324	75910323	1000
chr2_74535540_74538148_Hoxd9	chr2	75499844	75500843	1000
chr2_152561579_152563298_Id1	chr2	152529438	152530437	1000
chr2_152561579_152563298_Id1	chr2	152645438	152646437	1000
chr4_135698434_135701733_Id3	chr4	135428084	135429083	1000
chr4_135698434_135701733_Id3	chr4	135607084	135608083	1000
chr7_149844910_149848135_Igf2	chr7	149669522	149670521	1000
chr7_149844910_149848135_Igf2	chr7	149755522	149756521	1000
chr17_12958114_12962181_Igf2r	chr17	12935148	12936147	1000
chr17_25014180_25016935_Igfals	chr17	26642558	26643557	1000
chr13_16102561_16105504_Inhba	chr13	17787032	17788031	1000
chr13_16102561_16105504_Inhba	chr13	17789032	17790031	1000
chr8_87499950_87503039_Junb	chr8	87247494	87248493	1000
chr7_116312489_116314550_Lmo1	chr7	114711520	114712519	1000
chr2_91296389_91299367_Lrp4	chr2	91123878	91124877	1000
chr1_127807483_127809680_Lypd1	chr1	128896582	128897581	1000
chr1_127807483_127809680_Lypd1	chr1	128899582	128900581	1000
chr3_29908469_29911947_Mecom	chr3	30002208	30003207	1000
chr19_6334758_6337042_Men1	chr19	6276900	6277899	1000
chr12_37833973_37836746_Meox2	chr12	39507360	39508359	1000
chr5_38213280_38216792_Msx1	chr5	37728036	37729035	1000
chr10_127102912_127105995_Nab2	chr10	127080454	127081453	1000
chr10_127102912_127105995_Nab2	chr10	127496454	127497453	1000
chr8_87320883_87323459_Nfix	chr8	87239171	87240170	1000
chr19_46378354_46380862_Nfkb2	chr19	45094608	45095607	1000
chr11_70467133_70469959_Pfn1	chr11	69574546	69575545	1000
chr11_70467133_70469959_Pfn1	chr11	69733546	69734545	1000
chr11_70467133_70469959_Pfn1	chr11	69809546	69810545	1000
chr11_70467133_70469959_Pfn1	chr11	70479546	70480545	1000
chr13_55931559_55934572_Pitx1	chr13	56260066	56261065	1000
chr17_24685553_24689486_Pkd1	chr17	24767520	24768519	1000
chr10_12809571_12811281_Plagl1	chr10	13043426	13044425	1000
chr10_12809571_12811281_Plagl1	chr10	13046426	13047425	1000
chr17_28369475_28373816_Ppard	chr17	28382646	28383645	1000
chr17_21080536_21083642_Ppp2r1a	chr17	21669089	21670088	1000
chr11_98821857_98823528_Rara	chr11	98789692	98790691	1000
chr2_53936670_53939178_Rprm	chr2	52886924	52887923	1000
chr2_53936670_53939178_Rprm	chr2	52888924	52889923	1000
chr12_110837272_110841113_Rtl1	chr12	110074192	110075191	1000
chr12_110837272_110841113_Rtl1	chr12	110676192	110677191	1000
chr4_134706877_134709942_Runx3	chr4	134556410	134557409	1000
chr1_57026627_57029730_Satb2	chr1	55143178	55144177	1000
chr3_66784461_66787957_Shox2	chr3	66776209	66777208	1000
chr4_154593802_154596613_Ski	chr4	154488208	154489207	1000
chr4_154593802_154596613_Ski	chr4	154495208	154496207	1000
chr4_154593802_154596613_Ski	chr4	154507208	154508207	1000
chr8_81920191_81923739_Smad1	chr8	80039965	80040964	1000
chr19_23346653_23348500_Smc5	chr19	21347576	21348575	1000
chr2_72814956_72817313_Sp3	chr2	72315134	72316133	1000
chr2_72814956_72817313_Sp3	chr2	72397134	72398133	1000
chr11_96878986_96880992_Sp6	chr11	96837989	96838988	1000
chr19_46470246_46472935_Sufu	chr19	45090590	45091589	1000
chr18_60782378_60785115_Synpo	chr18	60826746	60827745	1000
chr6_52662811_52665204_Tax1bp1	chr6	51029008	51030007	1000
chr16_18585392_18588330_Tbx1	chr16	18497861	18498860	1000
chr3_99058023_99061810_Tbx15	chr3	99043916	99044915	1000
chr3_99058023_99061810_Tbx15	chr3	99045916	99046915	1000
chr11_85702310_85705082_Tbx4	chr11	85651696	85652695	1000
chr10_79894922_79897158_Tcf3	chr10	79861040	79862039	1000
chr18_69502950_69505851_Tcf4	chr18	69823400	69824399	1000
chr19_55815031_55819344_Tcf7l2	chr19	55672188	55673187	1000
chr8_13337175_13340621_Tfdp1	chr8	11552898	11553897	1000
chr12_87417484_87420547_Tgfb3	chr12	87365016	87366015	1000
chr13_56710029_56712867_Tgfbi	chr13	56700448	56701447	1000
chr14_32020383_32023474_Tnnc1	chr14	31944928	31945927	1000
chr14_32020383_32023474_Tnnc1	chr14	32247928	32248927	1000
chr7_149626419_149629008_Tnni2	chr7	148041714	148042713	1000
chr7_149626419_149629008_Tnni2	chr7	149667714	149668713	1000
chr7_149626419_149629008_Tnni2	chr7	149720714	149721713	1000
chr7_149626419_149629008_Tnni2	chr7	149732714	149733713	1000
chr7_149626419_149629008_Tnni2	chr7	149739714	149740713	1000
chr9_66894122_66897762_Tpm1	chr9	67024942	67025941	1000
chr9_66894122_66897762_Tpm1	chr9	67074942	67075941	1000
chr13_89878065_89882877_Vcan	chr13	90228471	90229470	1000
chr13_89878065_89882877_Vcan	chr13	90230471	90231470	1000
chr17_46165116_46169966_Vegfa	chr17	45822541	45823540	1000
chr15_66721970_66723921_Wisp1	chr15	68090946	68091945	1000
chr10_38882360_38884604_Wisp3	chr10	39255482	39256481	1000
chr10_38882360_38884604_Wisp3	chr10	39262482	39263481	1000
chr6_91358852_91361807_Wnt7a	chr6	91131330	91132329	1000
chr11_59118966_59122269_Wnt9a	chr11	59209618	59210617	1000
chr11_59118966_59122269_Wnt9a	chr11	59262618	59263617	1000
chr11_59118966_59122269_Wnt9a	chr11	59320618	59321617	1000
chr2_72122589_72125196_Zak	chr2	73321892	73322891	1000
chr2_72122589_72125196_Zak	chr2	73323892	73324891	1000
chr18_5591240_5594740_Zeb1	chr18	5160990	5161989	1000
chr7_30879614_30880927_Zfp260	chr7	29597270	29598269	1000
chr7_30879614_30880927_Zfp260	chr7	30981270	30982269	1000
chr8_90484546_90487815_Zfp423	chr8	90361180	90362179	1000
chr18_14128669_14133943_Zfp521	chr18	14839306	14840305	1000
chr5_139059130_139061688_Zfp68	chr5	140894409	140895408	1000
