# Supplementary material for: Characterization of hundreds of regulatory landscapes in developing limbs reveals two regimes of chromatin folding
Source: HighWire-hosted journal article supplement (doi:10.1101/gr.213066.116), 2016-12-06
Supplement: Supplemental_Table_S4.xlsx [file Supplemental_Table_S4.xlsx]

## Sheet: Sheet1
chrom
