# Supplementary material for: Characterization of hundreds of regulatory landscapes in developing limbs reveals two regimes of chromatin folding
Source: HighWire-hosted journal article supplement (doi:10.1101/gr.213066.116), 2016-12-06
Supplement: Supplemental_Table_S5.xlsx [file Supplemental_Table_S5.xlsx]

## Sheet: FL_E10.5
Putative shared enhancer region	Width of the putative shared enhancer region	Number of viewpoints interacting with the putative shared enhancer region	Names and positions of the viewpoints interacting with the putative shared enhancer region
chr2:73,407,542-73,414,823	7282	5	chr2_74495971_74499159_Evx2, chr2_74517642_74520443_Hoxd11, chr2_74511740_74514909_Hoxd12, chr2_74503399_74506910_Hoxd13, chr2_74535540_74538148_Hoxd9
chr2:73,786,065-73,796,064	10000	5	chr2_74495971_74499159_Evx2, chr2_74517642_74520443_Hoxd11, chr2_74511740_74514909_Hoxd12, chr2_74503399_74506910_Hoxd13, chr2_74535540_74538148_Hoxd9
chr15:102,855,567-102,870,351	14785	4	chr15_102795404_102798730_Hoxc10, chr15_102784024_102787175_Hoxc11, chr15_102848536_102851167_Hoxc4, chr15_102805257_102807929_Hoxc9
chr2:73,744,654-73,752,064	7411	3	chr2_74495971_74499159_Evx2, chr2_74511740_74514909_Hoxd12, chr2_74503399_74506910_Hoxd13
chr2:73,813,824-73,820,823	7000	3	chr2_74495971_74499159_Evx2, chr2_74511740_74514909_Hoxd12, chr2_74503399_74506910_Hoxd13
chr2:74,522,344-74,528,715	6372	3	chr2_73728822_73731611_Atf2, chr2_74517642_74520443_Hoxd11, chr2_74535540_74538148_Hoxd9
chr2:74,982,344-74,991,456	9113	3	chr2_74528796_74531118_Hoxd10, chr2_74517642_74520443_Hoxd11, chr2_74535540_74538148_Hoxd9
chr6:51,113,492-51,139,569	26078	3	chr6_52195252_52198732_Hoxa11, chr6_52211035_52213106_Hoxa13, chr6_52662811_52665204_Tax1bp1
chr15:102,572,567-102,581,099	8533	3	chr15_102795404_102798730_Hoxc10, chr15_102784024_102787175_Hoxc11, chr15_102805257_102807929_Hoxc9
chr15:102,826,093-102,846,566	20474	3	chr15_102795404_102798730_Hoxc10, chr15_102784024_102787175_Hoxc11, chr15_102805257_102807929_Hoxc9
chr2:75,420,457-75,428,456	8000	2	chr2_74528796_74531118_Hoxd10, chr2_74535540_74538148_Hoxd9
chr2:75,902,457-75,911,456	9000	2	chr2_74528796_74531118_Hoxd10, chr2_74511740_74514909_Hoxd12
chr6:5,773,020-5,784,019	11000	2	chr6_6829460_6831986_Dlx5, chr6_6813961_6817080_Dlx6
chr6:6,062,020-6,068,222	6203	2	chr6_6829460_6831986_Dlx5, chr6_6813961_6817080_Dlx6
chr6:51,141,492-51,152,491	11000	2	chr6_52195252_52198732_Hoxa11, chr6_52211035_52213106_Hoxa13
chr7:134,371,206-134,379,849	8644	2	chr7_134353601_134355810_Mylpf, chr7_133923872_133926827_Tbx6
chr7:140,823,239-140,833,238	10000	2	chr7_140205030_140208448_Ctbp2, chr7_140314221_140317388_Ctbp2
chr7:149,711,022-149,736,021	25000	2	chr7_149844910_149848135_Igf2, chr7_149626419_149629008_Tnni2
chr10:120,299,352-120,315,351	16000	2	chr10_119910594_119913110_Hmga2, chr10_119638151_119640580_Irak3
chr12:74,618,060-74,628,059	10000	2	chr12_74144893_74148226_Six1, chr12_74212462_74215129_Six4
chr13:120,276,112-120,283,111	7000	2	chr13_119457951_119459272_Fgf10, chr13_119501869_119505236_Fgf10
chr15:102,885,093-102,892,351	7259	2	chr15_102848536_102851167_Hoxc4, chr15_102805257_102807929_Hoxc9
chr18:68,866,338-68,874,899	8562	2	chr18_69502950_69505851_Tcf4, chr18_69751407_69754269_Tcf4

## Sheet: HL_E10.5
Putative shared enhancer region	Width of the putative shared enhancer region	Number of viewpoints interacting with the putative shared enhancer region	Names and positions of the viewpoints interacting with the putative shared enhancer region
chr2:73,785,824-73,795,653	9830	5	chr2_74495971_74499159_Evx2, chr2_74528796_74531118_Hoxd10, chr2_74517642_74520443_Hoxd11, chr2_74511740_74514909_Hoxd12, chr2_74503399_74506910_Hoxd13
chr2:74,980,344-74,991,541	11198	5	chr2_74528796_74531118_Hoxd10, chr2_74517642_74520443_Hoxd11, chr2_74511740_74514909_Hoxd12, chr2_74503399_74506910_Hoxd13, chr2_74535540_74538148_Hoxd9
chr2:74,519,344-74,529,715	10372	4	chr2_73728822_73731611_Atf2, chr2_74528796_74531118_Hoxd10, chr2_74517642_74520443_Hoxd11, chr2_74535540_74538148_Hoxd9
chr2:75,255,824-75,267,456	11633	4	chr2_74528796_74531118_Hoxd10, chr2_74517642_74520443_Hoxd11, chr2_74511740_74514909_Hoxd12, chr2_74535540_74538148_Hoxd9
chr2:75,347,824-75,359,456	11633	4	chr2_74528796_74531118_Hoxd10, chr2_74517642_74520443_Hoxd11, chr2_74511740_74514909_Hoxd12, chr2_74535540_74538148_Hoxd9
chr2:75,418,457-75,429,343	10887	4	chr2_74528796_74531118_Hoxd10, chr2_74517642_74520443_Hoxd11, chr2_74511740_74514909_Hoxd12, chr2_74535540_74538148_Hoxd9
chr2:75,032,344-75,052,541	20198	3	chr2_74528796_74531118_Hoxd10, chr2_74517642_74520443_Hoxd11, chr2_74535540_74538148_Hoxd9
chr2:75,184,344-75,197,343	13000	3	chr2_74528796_74531118_Hoxd10, chr2_74517642_74520443_Hoxd11, chr2_74535540_74538148_Hoxd9
chr2:75,272,457-75,285,343	12887	3	chr2_74528796_74531118_Hoxd10, chr2_74517642_74520443_Hoxd11, chr2_74535540_74538148_Hoxd9
chr2:75,326,344-75,335,456	9113	3	chr2_74528796_74531118_Hoxd10, chr2_74517642_74520443_Hoxd11, chr2_74535540_74538148_Hoxd9
chr2:75,491,344-75,503,343	12000	3	chr2_73728822_73731611_Atf2, chr2_74528796_74531118_Hoxd10, chr2_74535540_74538148_Hoxd9
chr6:51,114,492-51,139,569	25078	3	chr6_52195252_52198732_Hoxa11, chr6_52211035_52213106_Hoxa13, chr6_52662811_52665204_Tax1bp1
chr11:96,160,750-96,174,913	14164	3	chr11_96225871_96228956_Hoxb1, chr11_96054140_96056361_Hoxb13, chr11_96878986_96880992_Sp6
chr15:102,577,093-102,588,566	11474	3	chr15_102795404_102798730_Hoxc10, chr15_102784024_102787175_Hoxc11, chr15_102805257_102807929_Hoxc9
chr15:102,775,100-102,783,099	8000	3	chr15_102795404_102798730_Hoxc10, chr15_102784024_102787175_Hoxc11, chr15_102805257_102807929_Hoxc9
chr15:102,808,567-102,820,566	12000	3	chr15_102795404_102798730_Hoxc10, chr15_102784024_102787175_Hoxc11, chr15_102805257_102807929_Hoxc9
chr15:102,832,093-102,847,566	15474	3	chr15_102795404_102798730_Hoxc10, chr15_102784024_102787175_Hoxc11, chr15_102805257_102807929_Hoxc9
chr15:103,123,093-103,140,566	17474	3	chr15_102795404_102798730_Hoxc10, chr15_102784024_102787175_Hoxc11, chr15_102805257_102807929_Hoxc9
chr1:163,908,555-163,959,554	51000	2	chr1_164147278_164148832_Dnm3os, chr1_165241834_165244894_Prrx1
chr1:165,768,864-165,788,863	20000	2	chr1_165332110_165335732_Gorab, chr1_165241834_165244894_Prrx1
chr1:165,822,421-165,832,863	10443	2	chr1_165332110_165335732_Gorab, chr1_165241834_165244894_Prrx1
chr2:75,020,344-75,026,456	6113	2	chr2_74528796_74531118_Hoxd10, chr2_74535540_74538148_Hoxd9
chr2:75,903,344-75,913,456	10113	2	chr2_74528796_74531118_Hoxd10, chr2_74535540_74538148_Hoxd9
chr4:55,359,134-55,368,133	9000	2	chr4_56813939_56817328_Ikbkap, chr4_53837159_53839746_Tmem38b
chr4:134,476,584-134,484,909	8326	2	chr4_135698434_135701733_Id3, chr4_134706877_134709942_Runx3
chr6:5,775,020-5,784,222	9203	2	chr6_6829460_6831986_Dlx5, chr6_6813961_6817080_Dlx6
chr6:51,141,492-51,151,569	10078	2	chr6_52195252_52198732_Hoxa11, chr6_52211035_52213106_Hoxa13
chr6:52,197,508-52,206,507	9000	2	chr6_52195252_52198732_Hoxa11, chr6_52662811_52665204_Tax1bp1
chr6:52,896,492-52,903,569	7078	2	chr6_52195252_52198732_Hoxa11, chr6_52211035_52213106_Hoxa13
chr6:52,909,492-52,923,569	14078	2	chr6_52195252_52198732_Hoxa11, chr6_52211035_52213106_Hoxa13
chr6:84,812,162-84,823,161	11000	2	chr6_84534909_84538416_Cyp26b1, chr6_83864154_83865978_Zfml
chr6:84,971,566-84,979,161	7596	2	chr6_84534909_84538416_Cyp26b1, chr6_83864154_83865978_Zfml
chr7:133,931,850-133,939,849	8000	2	chr7_134353601_134355810_Mylpf, chr7_133923872_133926827_Tbx6
chr7:140,822,239-140,833,303	11065	2	chr7_140205030_140208448_Ctbp2, chr7_140314221_140317388_Ctbp2
chr7:149,639,214-149,649,021	9808	2	chr7_149844910_149848135_Igf2, chr7_149626419_149629008_Tnni2
chr7:149,663,214-149,676,021	12808	2	chr7_149844910_149848135_Igf2, chr7_149626419_149629008_Tnni2
chr7:149,691,022-149,700,021	9000	2	chr7_149844910_149848135_Igf2, chr7_149626419_149629008_Tnni2
chr7:149,707,022-149,756,021	49000	2	chr7_149844910_149848135_Igf2, chr7_149626419_149629008_Tnni2
chr9:65,033,935-65,047,934	14000	2	chr9_64988092_64990778_Igdcc3, chr9_63604233_63607322_Smad3
chr10:45,495,514-45,508,837	13324	2	chr10_45188881_45191794_Lin28b, chr10_45204558_45207471_Lin28b
chr10:45,521,514-45,530,837	9324	2	chr10_45188881_45191794_Lin28b, chr10_45204558_45207471_Lin28b
chr10:45,575,838-45,584,837	9000	2	chr10_45188881_45191794_Lin28b, chr10_45204558_45207471_Lin28b
chr10:45,603,838-45,612,513	8676	2	chr10_45188881_45191794_Lin28b, chr10_45204558_45207471_Lin28b
chr10:119,680,352-119,694,351	14000	2	chr10_119910594_119913110_Hmga2, chr10_120469988_120473103_Wif1
chr10:119,707,352-119,714,351	7000	2	chr10_119910594_119913110_Hmga2, chr10_120469988_120473103_Wif1
chr10:120,303,866-120,316,351	12486	2	chr10_119910594_119913110_Hmga2, chr10_119638151_119640580_Irak3
chr11:59,317,118-59,323,610	6493	2	chr11_59103743_59106479_Wnt3a, chr11_59118966_59122269_Wnt9a
chr11:96,175,914-96,183,913	8000	2	chr11_96225871_96228956_Hoxb1, chr11_96054140_96056361_Hoxb13
chr11:96,501,914-96,508,913	7000	2	chr11_96225871_96228956_Hoxb1, chr11_96131619_96133714_Hoxb9
chr11:98,991,156-98,999,191	8036	2	chr11_98798642_98800671_Rara, chr11_98821857_98823528_Rara
chr11:99,004,156-99,013,191	9036	2	chr11_98798642_98800671_Rara, chr11_98821857_98823528_Rara
chr12:74,617,296-74,628,295	11000	2	chr12_74144893_74148226_Six1, chr12_74212462_74215129_Six4
chr13:46,818,610-46,826,063	7454	2	chr13_47199953_47203176_Dek, chr13_48355943_48358276_Id4
chr13:56,255,566-56,267,565	12000	2	chr13_55931559_55934572_Pitx1, chr13_56803701_56807459_Smad5
chr13:56,680,948-56,688,947	8000	2	chr13_56803701_56807459_Smad5, chr13_56710029_56712867_Tgfbi
chr13:120,193,112-120,201,051	7940	2	chr13_119457951_119459272_Fgf10, chr13_119501869_119505236_Fgf10
chr14:72,998,048-73,006,065	8018	2	chr14_73108094_73111002_Fndc3a, chr14_73724127_73727004_Rb1
chr15:81,225,580-81,233,995	8416	2	chr15_80084611_80087550_Atf4, chr15_81414980_81418011_Ep300
chr15:102,788,093-102,797,099	9007	2	chr15_102784024_102787175_Hoxc11, chr15_102805257_102807929_Hoxc9
chr15:103,068,093-103,075,566	7474	2	chr15_102795404_102798730_Hoxc10, chr15_102805257_102807929_Hoxc9
chr17:25,317,307-25,326,306	9000	2	chr17_25269574_25272870_Clcn7, chr17_25409415_25412199_Ube2i
chr18:69,067,900-69,074,899	7000	2	chr18_69502950_69505851_Tcf4, chr18_69751407_69754269_Tcf4
chr19:37,977,046-37,987,083	10038	2	chr19_37771291_37773877_Cyp26a1, chr19_37758209_37760884_Cyp26c1

## Sheet: MB_E10.5
Putative shared enhancer region	Width of the putative shared enhancer region	Number of viewpoints interacting with the putative shared enhancer region	Names and positions of the viewpoints interacting with the putative shared enhancer region
chr2:73,744,654-73,752,823	8170	3	chr2_74517642_74520443_Hoxd11, chr2_74511740_74514909_Hoxd12, chr2_74503399_74506910_Hoxd13
chr6:51,114,492-51,126,569	12078	3	chr6_52195252_52198732_Hoxa11, chr6_52211035_52213106_Hoxa13, chr6_52662811_52665204_Tax1bp1
chr16:27,385,589-27,393,740	8152	3	chr16_28443899_28448279_Fgf12, chr16_28563097_28567135_Fgf12, chr16_25682462_25686020_Trp63
chr7:140,825,239-140,833,303	8065	2	chr7_140205030_140208448_Ctbp2, chr7_140314221_140317388_Ctbp2
chr7:149,710,214-149,726,021	15808	2	chr7_149844910_149848135_Igf2, chr7_149626419_149629008_Tnni2
chr9:64,946,625-64,959,624	13000	2	chr9_63867549_63870701_Smad6, chr9_66894122_66897762_Tpm1
chr11:98,826,156-98,835,191	9036	2	chr11_98798642_98800671_Rara, chr11_98821857_98823528_Rara
chr13:120,275,052-120,282,111	7060	2	chr13_119457951_119459272_Fgf10, chr13_119501869_119505236_Fgf10

## Sheet: FL_E11.5
Putative shared enhancer region	Width of the putative shared enhancer region	Number of viewpoints interacting with the putative shared enhancer region	Names and positions of the viewpoints interacting with the putative shared enhancer region
chr2:73,786,654-73,795,653	9000	5	chr2_74495971_74499159_Evx2, chr2_74528796_74531118_Hoxd10, chr2_74517642_74520443_Hoxd11, chr2_74511740_74514909_Hoxd12, chr2_74503399_74506910_Hoxd13
chr2:73,907,065-73,918,653	11589	5	chr2_74495971_74499159_Evx2, chr2_74528796_74531118_Hoxd10, chr2_74517642_74520443_Hoxd11, chr2_74511740_74514909_Hoxd12, chr2_74503399_74506910_Hoxd13
chr2:74,512,716-74,529,343	16628	5	chr2_73728822_73731611_Atf2, chr2_74528796_74531118_Hoxd10, chr2_74517642_74520443_Hoxd11, chr2_74511740_74514909_Hoxd12, chr2_74535540_74538148_Hoxd9
chr2:73,355,542-73,371,653	16112	4	chr2_74528796_74531118_Hoxd10, chr2_74517642_74520443_Hoxd11, chr2_74511740_74514909_Hoxd12, chr2_74503399_74506910_Hoxd13
chr15:102,885,567-102,894,351	8785	4	chr15_102795404_102798730_Hoxc10, chr15_102784024_102787175_Hoxc11, chr15_102848536_102851167_Hoxc4, chr15_102805257_102807929_Hoxc9
chr2:74,037,065-74,058,823	21759	3	chr2_74495971_74499159_Evx2, chr2_74511740_74514909_Hoxd12, chr2_74503399_74506910_Hoxd13
chr2:74,101,065-74,115,064	14000	3	chr2_74495971_74499159_Evx2, chr2_74511740_74514909_Hoxd12, chr2_74503399_74506910_Hoxd13
chr2:75,792,457-75,804,541	12085	3	chr2_74528796_74531118_Hoxd10, chr2_74517642_74520443_Hoxd11, chr2_74535540_74538148_Hoxd9
chr2:75,823,824-75,832,456	8633	3	chr2_74528796_74531118_Hoxd10, chr2_74511740_74514909_Hoxd12, chr2_74535540_74538148_Hoxd9
chr6:51,114,492-51,139,569	25078	3	chr6_52195252_52198732_Hoxa11, chr6_52211035_52213106_Hoxa13, chr6_52662811_52665204_Tax1bp1
chr15:102,835,567-102,845,566	10000	3	chr15_102795404_102798730_Hoxc10, chr15_102784024_102787175_Hoxc11, chr15_102805257_102807929_Hoxc9
chr1:93,492,128-93,511,127	19000	2	chr1_94072214_94075604_Hdac4, chr1_93697637_93699620_Twist2
chr1:165,586,421-165,593,420	7000	2	chr1_165332110_165335732_Gorab, chr1_165241834_165244894_Prrx1
chr1:165,770,864-165,778,420	7557	2	chr1_165332110_165335732_Gorab, chr1_165241834_165244894_Prrx1
chr2:69,656,872-69,664,954	8083	2	chr2_71383014_71385729_Dlx2, chr2_69699429_69701481_Ssb
chr2:72,312,634-72,319,633	7000	2	chr2_71383014_71385729_Dlx2, chr2_72814956_72817313_Sp3
chr2:73,381,654-73,388,653	7000	2	chr2_74495971_74499159_Evx2, chr2_74503399_74506910_Hoxd13
chr2:74,023,065-74,033,064	10000	2	chr2_74495971_74499159_Evx2, chr2_74503399_74506910_Hoxd13
chr2:74,487,654-74,511,715	24062	2	chr2_73728822_73731611_Atf2, chr2_74503399_74506910_Hoxd13
chr2:75,044,344-75,051,456	7113	2	chr2_74528796_74531118_Hoxd10, chr2_74535540_74538148_Hoxd9
chr2:75,256,344-75,265,343	9000	2	chr2_74528796_74531118_Hoxd10, chr2_74535540_74538148_Hoxd9
chr2:75,493,344-75,501,343	8000	2	chr2_74528796_74531118_Hoxd10, chr2_74535540_74538148_Hoxd9
chr2:75,536,344-75,547,456	11113	2	chr2_74528796_74531118_Hoxd10, chr2_74535540_74538148_Hoxd9
chr2:75,903,344-75,912,823	9480	2	chr2_74511740_74514909_Hoxd12, chr2_74535540_74538148_Hoxd9
chr5:31,824,981-31,833,909	8929	2	chr5_33614803_33618159_Ctbp1, chr5_32434356_32436464_Fosl2
chr6:5,973,020-5,982,019	9000	2	chr6_6829460_6831986_Dlx5, chr6_6813961_6817080_Dlx6
chr6:6,523,223-6,532,222	9000	2	chr6_6829460_6831986_Dlx5, chr6_6813961_6817080_Dlx6
chr6:50,925,492-50,939,569	14078	2	chr6_52195252_52198732_Hoxa11, chr6_52211035_52213106_Hoxa13
chr6:51,141,492-51,151,569	10078	2	chr6_52195252_52198732_Hoxa11, chr6_52211035_52213106_Hoxa13
chr6:52,170,492-52,195,507	25016	2	chr6_52195252_52198732_Hoxa11, chr6_52662811_52665204_Tax1bp1
chr6:52,197,508-52,211,507	14000	2	chr6_52195252_52198732_Hoxa11, chr6_52662811_52665204_Tax1bp1
chr6:52,784,492-52,794,569	10078	2	chr6_52195252_52198732_Hoxa11, chr6_52211035_52213106_Hoxa13
chr6:52,796,570-52,816,569	20000	2	chr6_52195252_52198732_Hoxa11, chr6_52211035_52213106_Hoxa13
chr6:52,894,570-52,905,569	11000	2	chr6_52195252_52198732_Hoxa11, chr6_52211035_52213106_Hoxa13
chr6:52,910,570-52,923,569	13000	2	chr6_52195252_52198732_Hoxa11, chr6_52211035_52213106_Hoxa13
chr6:143,477,485-143,484,266	6782	2	chr6_144155558_144157976_Sox5, chr6_144729196_144732774_Sox5
chr7:140,824,239-140,832,303	8065	2	chr7_140205030_140208448_Ctbp2, chr7_140314221_140317388_Ctbp2
chr7:149,638,214-149,647,021	8808	2	chr7_149844910_149848135_Igf2, chr7_149626419_149629008_Tnni2
chr7:149,662,214-149,678,213	16000	2	chr7_149844910_149848135_Igf2, chr7_149626419_149629008_Tnni2
chr7:149,709,022-149,747,021	38000	2	chr7_149844910_149848135_Igf2, chr7_149626419_149629008_Tnni2
chr7:149,760,214-149,769,213	9000	2	chr7_148134123_148136461_Ifitm5, chr7_149626419_149629008_Tnni2
chr7:149,777,214-149,787,213	10000	2	chr7_149844910_149848135_Igf2, chr7_149626419_149629008_Tnni2
chr10:119,679,046-119,692,045	13000	2	chr10_119910594_119913110_Hmga2, chr10_120469988_120473103_Wif1
chr10:119,704,352-119,714,351	10000	2	chr10_119910594_119913110_Hmga2, chr10_120469988_120473103_Wif1
chr10:120,305,352-120,314,351	9000	2	chr10_119910594_119913110_Hmga2, chr10_119638151_119640580_Irak3
chr12:110,672,432-110,679,691	7260	2	chr12_110837272_110841113_Rtl1, chr12_110030583_110033282_Yy1
chr14:77,207,125-77,213,321	6197	2	chr14_78935084_78938166_Akap11, chr14_78705549_78708094_Tnfsf11
chr15:102,182,227-102,190,841	8615	2	chr15_102236459_102240226_Sp1, chr15_102195697_102197757_Sp7
chr15:102,203,842-102,210,226	6385	2	chr15_102236459_102240226_Sp1, chr15_102195697_102197757_Sp7
chr15:103,124,093-103,141,566	17474	2	chr15_102795404_102798730_Hoxc10, chr15_102805257_102807929_Hoxc9
chr16:21,335,808-21,344,348	8541	2	chr16_20731852_20734764_Chrd, chr16_20516628_20519070_Dvl3
chr16:27,385,588-27,394,588	9001	2	chr16_28443899_28448279_Fgf12, chr16_28751284_28754891_Fgf12
chr18:68,866,338-68,874,899	8562	2	chr18_69502950_69505851_Tcf4, chr18_69751407_69754269_Tcf4
chr18:69,066,900-69,079,337	12438	2	chr18_69502950_69505851_Tcf4, chr18_69751407_69754269_Tcf4
chr18:69,949,900-69,958,899	9000	2	chr18_69502950_69505851_Tcf4, chr18_69751407_69754269_Tcf4
chr18:75,363,156-75,372,159	9004	2	chr18_76399843_76403469_Smad2, chr18_75525548_75529772_Smad7
chr19:5,484,848-5,493,269	8422	2	chr19_5447409_5449287_Fosl1, chr19_5636396_5639143_Rela
chr19:37,977,046-37,986,083	9038	2	chr19_37771291_37773877_Cyp26a1, chr19_37758209_37760884_Cyp26c1

## Sheet: HL_E11.5
region	Putative shared enhancer region	Width of the putative shared enhancer region	Number of viewpoints interacting with the putative shared enhancer region	Names and positions of the viewpoints interacting with the putative shared enhancer region
chr2:73,744,542-73,752,823	8282	6	chr2_73728822_73731611_Atf2, chr2_74495971_74499159_Evx2, chr2_74528796_74531118_Hoxd10, chr2_74517642_74520443_Hoxd11, chr2_74511740_74514909_Hoxd12, chr2_74503399_74506910_Hoxd13
chr2:74,518,716-74,528,541	9826	6	chr2_73728822_73731611_Atf2, chr2_74528796_74531118_Hoxd10, chr2_74517642_74520443_Hoxd11, chr2_74511740_74514909_Hoxd12, chr2_74503399_74506910_Hoxd13, chr2_74535540_74538148_Hoxd9
chr15:102,765,100-102,785,092	19993	4	chr15_102795404_102798730_Hoxc10, chr15_102784024_102787175_Hoxc11, chr15_102848536_102851167_Hoxc4, chr15_102805257_102807929_Hoxc9
chr15:103,124,093-103,141,092	17000	4	chr15_102795404_102798730_Hoxc10, chr15_102784024_102787175_Hoxc11, chr15_102805257_102807929_Hoxc9, chr15_102195697_102197757_Sp7
chr2:75,443,344-75,451,541	8198	3	chr2_74528796_74531118_Hoxd10, chr2_74517642_74520443_Hoxd11, chr2_74535540_74538148_Hoxd9
chr2:75,538,457-75,546,343	7887	3	chr2_73728822_73731611_Atf2, chr2_74528796_74531118_Hoxd10, chr2_74535540_74538148_Hoxd9
chr6:51,114,492-51,129,569	15078	3	chr6_52195252_52198732_Hoxa11, chr6_52211035_52213106_Hoxa13, chr6_52662811_52665204_Tax1bp1
chr15:102,571,100-102,588,566	17467	3	chr15_102795404_102798730_Hoxc10, chr15_102784024_102787175_Hoxc11, chr15_102805257_102807929_Hoxc9
chr15:102,810,093-102,817,566	7474	3	chr15_102795404_102798730_Hoxc10, chr15_102784024_102787175_Hoxc11, chr15_102805257_102807929_Hoxc9
chr2:73,362,542-73,371,823	9282	2	chr2_74517642_74520443_Hoxd11, chr2_74511740_74514909_Hoxd12
chr2:75,491,344-75,501,343	10000	2	chr2_74528796_74531118_Hoxd10, chr2_74535540_74538148_Hoxd9
chr2:75,793,344-75,803,456	10113	2	chr2_74528796_74531118_Hoxd10, chr2_74535540_74538148_Hoxd9
chr6:6,526,020-6,532,222	6203	2	chr6_6829460_6831986_Dlx5, chr6_6813961_6817080_Dlx6
chr6:50,926,570-50,939,491	12922	2	chr6_52195252_52198732_Hoxa11, chr6_52211035_52213106_Hoxa13
chr6:51,131,492-51,138,569	7078	2	chr6_52195252_52198732_Hoxa11, chr6_52211035_52213106_Hoxa13
chr6:52,197,508-52,211,507	14000	2	chr6_52195252_52198732_Hoxa11, chr6_52662811_52665204_Tax1bp1
chr6:52,258,508-52,269,569	11062	2	chr6_52211035_52213106_Hoxa13, chr6_52662811_52665204_Tax1bp1
chr6:52,785,492-52,791,569	6078	2	chr6_52195252_52198732_Hoxa11, chr6_52211035_52213106_Hoxa13
chr6:52,897,492-52,906,569	9078	2	chr6_52195252_52198732_Hoxa11, chr6_52211035_52213106_Hoxa13
chr6:52,908,492-52,921,491	13000	2	chr6_52195252_52198732_Hoxa11, chr6_52211035_52213106_Hoxa13
chr7:140,824,239-140,834,238	10000	2	chr7_140205030_140208448_Ctbp2, chr7_140314221_140317388_Ctbp2
chr7:149,516,022-149,523,213	7192	2	chr7_149844910_149848135_Igf2, chr7_149626419_149629008_Tnni2
chr7:149,654,022-149,678,213	24192	2	chr7_149844910_149848135_Igf2, chr7_149626419_149629008_Tnni2
chr7:149,691,022-149,698,213	7192	2	chr7_149844910_149848135_Igf2, chr7_149626419_149629008_Tnni2
chr7:149,714,214-149,758,213	44000	2	chr7_149844910_149848135_Igf2, chr7_149626419_149629008_Tnni2
chr8:73,115,008-73,124,139	9132	2	chr8_72895934_72899081_Comp, chr8_74841120_74844160_Klf2
chr10:120,306,352-120,313,865	7514	2	chr10_119910594_119913110_Hmga2, chr10_119638151_119640580_Irak3
chr11:99,004,156-99,015,191	11036	2	chr11_98798642_98800671_Rara, chr11_98821857_98823528_Rara
chr11:99,086,192-99,093,605	7414	2	chr11_98821857_98823528_Rara, chr11_100799145_100801066_Stat3
chr12:74,642,060-74,652,059	10000	2	chr12_74144893_74148226_Six1, chr12_74212462_74215129_Six4
chr12:76,914,735-76,922,063	7329	2	chr12_77277147_77279323_Esr2, chr12_75007551_75011578_Hif1a
chr14:55,527,138-55,534,221	7084	2	chr14_55612678_55614766_Myh7, chr14_57503946_57507329_Zmym2
chr15:98,459,814-98,468,813	9000	2	chr15_98619059_98621568_Wnt1, chr15_98606409_98609148_Wnt10b
chr15:98,697,409-98,705,785	8377	2	chr15_97832813_97835758_Col2a1, chr15_98763803_98766015_Tuba1b
chr15:102,500,567-102,507,226	6660	2	chr15_102795404_102798730_Hoxc10, chr15_102195697_102197757_Sp7
chr15:102,788,093-102,797,099	9007	2	chr15_102784024_102787175_Hoxc11, chr15_102805257_102807929_Hoxc9
chr18:69,352,900-69,361,337	8438	2	chr18_69502950_69505851_Tcf4, chr18_69751407_69754269_Tcf4
chr19:3,636,817-3,647,847	11031	2	chr19_5447409_5449287_Fosl1, chr19_3684281_3686353_Lrp5
chr19:37,977,046-37,986,083	9038	2	chr19_37771291_37773877_Cyp26a1, chr19_37758209_37760884_Cyp26c1
chr19:45,731,854-45,738,945	7092	2	chr19_45816056_45818653_Fgf8, chr19_45308187_45310704_Lbx1

## Sheet: FL_E13.5
Putative shared enhancer region	Width of the putative shared enhancer region	Number of viewpoints interacting with the putative shared enhancer region	Names and positions of the viewpoints interacting with the putative shared enhancer region
chr2:73,744,654-73,752,653	8000	4	chr2_74495971_74499159_Evx2, chr2_74517642_74520443_Hoxd11, chr2_74511740_74514909_Hoxd12, chr2_74503399_74506910_Hoxd13
chr15:103,130,100-103,141,566	11467	4	chr15_102795404_102798730_Hoxc10, chr15_102784024_102787175_Hoxc11, chr15_102848536_102851167_Hoxc4, chr15_102805257_102807929_Hoxc9
chr2:73,362,654-73,371,064	8411	3	chr2_74495971_74499159_Evx2, chr2_74511740_74514909_Hoxd12, chr2_74503399_74506910_Hoxd13
chr2:75,536,824-75,545,343	8520	3	chr2_73728822_73731611_Atf2, chr2_74511740_74514909_Hoxd12, chr2_74535540_74538148_Hoxd9
chr6:51,114,492-51,132,569	18078	3	chr6_52195252_52198732_Hoxa11, chr6_52211035_52213106_Hoxa13, chr6_52662811_52665204_Tax1bp1
chr2:75,793,344-75,803,541	10198	2	chr2_74517642_74520443_Hoxd11, chr2_74535540_74538148_Hoxd9
chr6:6,523,223-6,532,019	8797	2	chr6_6829460_6831986_Dlx5, chr6_6813961_6817080_Dlx6
chr7:140,824,239-140,832,303	8065	2	chr7_140205030_140208448_Ctbp2, chr7_140314221_140317388_Ctbp2
chr7:149,638,022-149,648,021	10000	2	chr7_149844910_149848135_Igf2, chr7_149626419_149629008_Tnni2
chr7:149,657,214-149,670,021	12808	2	chr7_149844910_149848135_Igf2, chr7_149626419_149629008_Tnni2
chr7:149,710,022-149,735,213	25192	2	chr7_149844910_149848135_Igf2, chr7_149626419_149629008_Tnni2
chr11:106,073,901-106,082,737	8837	2	chr11_104410121_104412681_Myl4, chr11_106116504_106117972_Psmc5
chr12:110,645,432-110,659,691	14260	2	chr12_110837272_110841113_Rtl1, chr12_110030583_110033282_Yy1
chr13:120,274,052-120,283,111	9060	2	chr13_119457951_119459272_Fgf10, chr13_119501869_119505236_Fgf10

## Sheet: HL_E13.5
region	Putative shared enhancer region	Width of the putative shared enhancer region	Number of viewpoints interacting with the putative shared enhancer region	Names and positions of the viewpoints interacting with the putative shared enhancer region
chr2:73,744,542-73,751,823	7282	5	chr2_74495971_74499159_Evx2, chr2_74528796_74531118_Hoxd10, chr2_74517642_74520443_Hoxd11, chr2_74511740_74514909_Hoxd12, chr2_74503399_74506910_Hoxd13
chr2:75,904,344-75,913,541	9198	4	chr2_74528796_74531118_Hoxd10, chr2_74517642_74520443_Hoxd11, chr2_74511740_74514909_Hoxd12, chr2_74535540_74538148_Hoxd9
chr15:102,773,093-102,785,092	12000	4	chr15_102795404_102798730_Hoxc10, chr15_102784024_102787175_Hoxc11, chr15_102848536_102851167_Hoxc4, chr15_102805257_102807929_Hoxc9
chr2:73,317,872-73,328,823	10952	3	chr2_71383014_71385729_Dlx2, chr2_74511740_74514909_Hoxd12, chr2_72122589_72125196_Zak
chr2:74,522,065-74,528,823	6759	3	chr2_74495971_74499159_Evx2, chr2_74511740_74514909_Hoxd12, chr2_72814956_72817313_Sp3
chr2:75,793,457-75,804,343	10887	3	chr2_74528796_74531118_Hoxd10, chr2_74517642_74520443_Hoxd11, chr2_74535540_74538148_Hoxd9
chr6:51,113,492-51,128,569	15078	3	chr6_52195252_52198732_Hoxa11, chr6_52211035_52213106_Hoxa13, chr6_52662811_52665204_Tax1bp1
chr15:103,127,093-103,141,566	14474	3	chr15_102795404_102798730_Hoxc10, chr15_102784024_102787175_Hoxc11, chr15_102805257_102807929_Hoxc9
chr2:73,362,542-73,370,823	8282	2	chr2_74517642_74520443_Hoxd11, chr2_74511740_74514909_Hoxd12
chr2:75,494,457-75,503,343	8887	2	chr2_74528796_74531118_Hoxd10, chr2_74535540_74538148_Hoxd9
chr6:50,928,492-50,938,569	10078	2	chr6_52195252_52198732_Hoxa11, chr6_52211035_52213106_Hoxa13
chr6:52,196,508-52,205,507	9000	2	chr6_52195252_52198732_Hoxa11, chr6_52662811_52665204_Tax1bp1
chr6:52,785,492-52,793,569	8078	2	chr6_52195252_52198732_Hoxa11, chr6_52211035_52213106_Hoxa13
chr6:52,797,492-52,804,569	7078	2	chr6_52195252_52198732_Hoxa11, chr6_52211035_52213106_Hoxa13
chr6:52,913,570-52,922,491	8922	2	chr6_52195252_52198732_Hoxa11, chr6_52211035_52213106_Hoxa13
chr7:140,824,239-140,833,238	9000	2	chr7_140205030_140208448_Ctbp2, chr7_140314221_140317388_Ctbp2
chr7:149,664,022-149,673,021	9000	2	chr7_149844910_149848135_Igf2, chr7_149626419_149629008_Tnni2
chr7:149,704,022-149,736,213	32192	2	chr7_149844910_149848135_Igf2, chr7_149626419_149629008_Tnni2
chr7:149,745,214-149,759,213	14000	2	chr7_149844910_149848135_Igf2, chr7_149626419_149629008_Tnni2
chr8:87,230,671-87,251,670	21000	2	chr8_87499950_87503039_Junb, chr8_87320883_87323459_Nfix
chr11:96,835,166-96,842,488	7323	2	chr11_96131619_96133714_Hoxb9, chr11_96878986_96880992_Sp6
chr13:120,275,052-120,283,111	8060	2	chr13_119457951_119459272_Fgf10, chr13_119501869_119505236_Fgf10
chr15:102,941,352-102,950,351	9000	2	chr15_102848536_102851167_Hoxc4, chr15_102805257_102807929_Hoxc9
chr16:18,495,311-18,502,310	7000	2	chr16_19759451_19762171_B3gnt5, chr16_18585392_18588330_Tbx1
chr19:45,088,090-45,098,107	10018	2	chr19_46378354_46380862_Nfkb2, chr19_46470246_46472935_Sufu

## Sheet: Correlation_Unrelated_Genes
Genes Sharing Putative Enhancer(s)	Correlation
Hoxb13-Sp6	N/A
Ifitm5-Tnni2	0.93529
Dnm3os-Prrx1	0.901481
Ifg2-Tnni2	0.887786
Smad6-Tpm1	0.865978
Gorab-Prrx1	0.860175
Fgf8-Lbx1	0.77447
Comp-Klf2	0.739761
Hoxd12-sp3	0.672901
Rara-Stat3	0.568815
Hoxd12-Zak	0.567767
Evx-Sp3	0.545304
Id3-Runx3	0.525852
Atf2-Hoxd12	0.516925
Atf2-Hoxd11	0.475588
Atf2-Hoxd13	0.475197
Atf2-Evx2	0.472508
Nfkb2-Sufu	0.469875
Atf2-Hoxd10	0.465427
Clcn7-Ube2i	0.447736
Rtl1-Yy1	0.442042
Hdac4-Twist2	0.424606
Esr2-Hif1a	0.422917
Chrd-Dvl3	0.419231
Atf2-Hoxd9	0.350924
Dek-Id4	0.338247
Fgf12-Trp63	0.30926
Dlx2-Ssb	0.303538
Hoxa13-Tax1bp1	0.297775
Pitx1-Smad5	0.276424
Dlx2-Hoxd12	0.272495
Dlx2-Sp3	0.245895
Myh7-Zmym2	0.098826
Hoxb1-sp6	0.0603965
Mylpf-Tbx6	0.013825
Ctb1-Fosl2	-0.00402922
Igdcc3-Smad3	-0.0239728
Hoxa11-Tax1bp1	-0.042649
Hmga2-Wif1	-0.0466579
Fosl1-Rela	-0.0681794
Junb-Nfix	-0.193218
Hoxc10-Sp7	-0.194013
Hmga2-Irak3	-0.206643
Akap11-Tnfsf11	-0.224482
Ikbkap-Tmem38b	-0.228111
Cyp26b1-Zfml	-0.357946
Dlx2-Zak	-0.394645
Myl4-Psmc5	-0.52024
Fndc3a-Rb1	-0.618114
Col2a1-Tuba1b	-0.645693
Atf4-Ep300	-0.672542
