# Supplementary material for: Characterization of hundreds of regulatory landscapes in developing limbs reveals two regimes of chromatin folding
Source: HighWire-hosted journal article supplement (doi:10.1101/gr.213066.116), 2016-12-06
Supplement: Supplemental_Table_S6.xlsx [file Supplemental_Table_S6.xlsx]

## Sheet: Sheet1
TargetID	ProbeID	Sequence	Replication	Strand	Coordinates
2610008E11RIK	BA_593036_000238	AAATAAGTAAGCCAACTCATGCACCATTTACCTTAATTTTCAAATTTTACTCAACTCTTAAAATCTGCTTAAGCACTGAATGTTGATGCTAAGTGACATCAAGTTGCTGGGAGCCTTTAC	1	+	chr10:78559711-78559830
2610008E11RIK	BA_593036_000239	AAATCTGCTTAAGCACTGAATGTTGATGCTAAGTGACATCAAGTTGCTGGGAGCCTTTACCGAAAAAATCAACCAGATGACACTGTCATAAATTGATTTTGTTTCTTTTAGCCTCCTCAT	1	+	chr10:78559771-78559890
2610008E11RIK	BA_593036_000240	CGAAAAAATCAACCAGATGACACTGTCATAAATTGATTTTGTTTCTTTTAGCCTCCTCATGAAATTCTTAGGCAACTGTGATCAAAGTAGAGGGATGTCCCCGAAGGGGCGCTCTCCTTT	1	+	chr10:78559831-78559950
2610008E11RIK	BA_593036_000241	GAAATTCTTAGGCAACTGTGATCAAAGTAGAGGGATGTCCCCGAAGGGGCGCTCTCCTTTGCTTACTGGCCTCCGAGCTGAGCTGCTTCTCCTTTACATATAAGGGACTGCAGAATCCAC	1	+	chr10:78559891-78560010
2610008E11RIK	BA_593036_000242	GCTTACTGGCCTCCGAGCTGAGCTGCTTCTCCTTTACATATAAGGGACTGCAGAATCCACGGACCCGGCTCCTCTCTTGAAGGAAACCCATCTCCCTCAAAGTCCTCGCGGGCAAGTTGT	1	+	chr10:78559951-78560070
2610008E11RIK	BA_593036_000243	GGACCCGGCTCCTCTCTTGAAGGAAACCCATCTCCCTCAAAGTCCTCGCGGGCAAGTTGTGGACTCCAGCAACCTCCACCCTCCAGCCCAGCCTTGAAGGACCTGACAACGGCGCAGGCG	1	+	chr10:78560011-78560130
2610008E11RIK	BA_593036_000244	GGACTCCAGCAACCTCCACCCTCCAGCCCAGCCTTGAAGGACCTGACAACGGCGCAGGCGCACCGGGCCGGGGGGTCGGGGGCGGCGGAGGGTGCAGAGACAGCTTCCCCGCTGCAGGAC	2	+	chr10:78560071-78560190
2610008E11RIK	BA_593036_000245	CACCGGGCCGGGGGGTCGGGGGCGGCGGAGGGTGCAGAGACAGCTTCCCCGCTGCAGGACGCTCGCACTCACCATGACAGGCTCTGCCGACATCCTGCGTCCTGCGCGGGCCTCCCCACC	2	+	chr10:78560131-78560250
2610008E11RIK	BA_593036_000246	GCTCGCACTCACCATGACAGGCTCTGCCGACATCCTGCGTCCTGCGCGGGCCTCCCCACCGCGACTGTCACAGGAGACAGGGGCCTCAGTGATTTCCGATCCTTCGGAACTGGATGAGGC	1	+	chr10:78560191-78560310
2610008E11RIK	BA_593036_000247	GCGACTGTCACAGGAGACAGGGGCCTCAGTGATTTCCGATCCTTCGGAACTGGATGAGGCTACAGATCTAAGATGGCCGGGGACAGACAAAGGCCACAGCGGAGCAGCGAAGGCCCGCCC	1	+	chr10:78560251-78560370
2610008E11RIK	BA_593036_000248	TACAGATCTAAGATGGCCGGGGACAGACAAAGGCCACAGCGGAGCAGCGAAGGCCCGCCCTCCATGCTCGCTCTCTGTGTATGATTGGGCAATTCTCAGTCTAGTGCATCCGATTGGATA	1	+	chr10:78560311-78560430
2610008E11RIK	BA_593036_000249	TCCATGCTCGCTCTCTGTGTATGATTGGGCAATTCTCAGTCTAGTGCATCCGATTGGATAGCATTTCGGGCTTGGCTACGAGTGACAGTAGACAGAACCAATTCGTGCGTGAATCAAGCA	1	+	chr10:78560371-78560490
2610008E11RIK	BA_593036_000250	GCAAGTTCTTGCTCACAGATGTTGTCAGGCAGGGCTGCTCCCAACCCCGTGAGAGAACAGAGCCCAGTACTGAACAATTGCCCTGGATATAGAGCTAAAGGATTTATGGACTTACGGCTG	1	+	chr10:78560519-78560638
2610008E11RIK	BA_593036_000251	TATATATATATATATATATCTTATTCACAAATGGAAATCACATCATGACAGTTTTAAACTGTGTTTTCCCAACTCTAAGCTTCAAAATAAAAAGCATTCATGTAAGGCAGCAATGTCCGA	1	+	chr10:78560667-78560786
2610008E11RIK	BA_593036_000252	GTGTTTTCCCAACTCTAAGCTTCAAAATAAAAAGCATTCATGTAAGGCAGCAATGTCCGATACAAGCAACATGGTAGACAGAACTGAAAAATTGGTTAATTATTTAGGTATGCATTGTGA	1	+	chr10:78560727-78560846
2610008E11RIK	BA_593036_000253	TACAAGCAACATGGTAGACAGAACTGAAAAATTGGTTAATTATTTAGGTATGCATTGTGACTTCTTCTGAAGGGTGTTGTTATATTATACTTTGCTCTCATCATTCCCTGTTCTATTTTC	1	+	chr10:78560787-78560906
2610008E11RIK	BA_593036_000254	CTTCTTCTGAAGGGTGTTGTTATATTATACTTTGCTCTCATCATTCCCTGTTCTATTTTCTCTCCCCCTTTTCTCCTCAGAATCACATATATGTATTCTGAGAAGTGTCAGCTTTAAAAA	1	+	chr10:78560847-78560966
2610008E11RIK	BA_593036_000255	TCTCCCCCTTTTCTCCTCAGAATCACATATATGTATTCTGAGAAGTGTCAGCTTTAAAAAAAAAAATCTAAACAGGTAAAATTCACTATAATAACAATGATGGCATAATTTATTTCTCTT	1	+	chr10:78560907-78561026
2610008E11RIK	BA_593036_000256	AAAAAATCTAAACAGGTAAAATTCACTATAATAACAATGATGGCATAATTTATTTCTCTTTATAGAAGAAAAAAATTGAACACGTATAGTGAGCCGCCACATGCATGCAAATTATTTCCA	1	+	chr10:78560967-78561086
2610008E11RIK	BA_593036_000257	TATAGAAGAAAAAAATTGAACACGTATAGTGAGCCGCCACATGCATGCAAATTATTTCCATTCCTTTTGTTTTTGAGTGCTAATTTGACCAAATTCCAAACTGTTCTGAAAAATCTTAGA	1	+	chr10:78561027-78561146
2610008E11RIK	BA_593036_000258	TTCCTTTTGTTTTTGAGTGCTAATTTGACCAAATTCCAAACTGTTCTGAAAAATCTTAGAGAAAAGCAAATGACAATTAGAGAGATGTGCCGACCAATAAGAATGCATTTGCTTTGCAGA	1	+	chr10:78561087-78561206
2610008E11RIK	BA_593036_000259	GAAAAGCAAATGACAATTAGAGAGATGTGCCGACCAATAAGAATGCATTTGCTTTGCAGAAATGTTGCCGTATAAGGAGTATGTCTTGATTTCAGCTGGGCATAGCAATTTTGGATACCT	1	+	chr10:78561147-78561266
2610008E11RIK	BA_593036_000260	AATGTTGCCGTATAAGGAGTATGTCTTGATTTCAGCTGGGCATAGCAATTTTGGATACCTGAAAGTGAGATGTGAGGTGGTGGTGGGCAAAGCCATGTAGCACACATGGATATCATGAAC	1	+	chr10:78561207-78561326
2610008E11RIK	BA_593036_000261	GAAAGTGAGATGTGAGGTGGTGGTGGGCAAAGCCATGTAGCACACATGGATATCATGAACAGCTAACTCAGCCAAGACCCTGACGCACATGCATCTAAGTTGGCCACACATTATAACCCC	1	+	chr10:78561267-78561386
ACAN	BA_593036_000995	AGAAAGTATTCTAGCAGAGAACAGATGAACAGAACCAGGAAGGCTGCCCAAGGAATGTGACTCCTGAACAGGATGGGACAAGTGTCTATGTGTCACTCAGGGCTCTCTGAAGTTGTGACT	1	+	chr7:86196091-86196210
ACAN	BA_593036_000996	CTCCTGAACAGGATGGGACAAGTGTCTATGTGTCACTCAGGGCTCTCTGAAGTTGTGACTTTAGTTCTCAGAATCGAGTCTTCAAAGTGTATGGACATTAGCCTGGGCTGTGTGCATCCT	1	+	chr7:86196151-86196270
ACAN	BA_593036_000997	TTAGTTCTCAGAATCGAGTCTTCAAAGTGTATGGACATTAGCCTGGGCTGTGTGCATCCTCCAGAAGGCAGTGTGGTGTCATATCCATCTGTCCCTACAGCCCTTCACTGCCTGGGTGAC	1	+	chr7:86196211-86196330
ACAN	BA_593036_000998	CCAGAAGGCAGTGTGGTGTCATATCCATCTGTCCCTACAGCCCTTCACTGCCTGGGTGACTTAGAATCTCAATGTTTTAGTGGGTACCTGGGGGTCCGTGGGGTCACGAGGCATCAGGCA	1	+	chr7:86196271-86196390
ACAN	BA_593036_000999	TTAGAATCTCAATGTTTTAGTGGGTACCTGGGGGTCCGTGGGGTCACGAGGCATCAGGCATATACAAAATGGCTGCTGTCTGTTCGTTAAAACTACTCGATGATCAGTAACCATCTGTTT	1	+	chr7:86196331-86196450
ACAN	BA_593036_001000	TATACAAAATGGCTGCTGTCTGTTCGTTAAAACTACTCGATGATCAGTAACCATCTGTTTCCTTATTTACAAAGATGAATTACCTATTGAATATTTGTCTTTGACTTGAATTGCTCTTCA	1	+	chr7:86196391-86196510
ACAN	BA_593036_001001	CCTTATTTACAAAGATGAATTACCTATTGAATATTTGTCTTTGACTTGAATTGCTCTTCATCAATCCAAGGCCCTCCGGGATATACGTCAAATATGATGCCACTTTGCAGACAAGGACAG	1	+	chr7:86196451-86196570
ACAN	BA_593036_001002	TCAATCCAAGGCCCTCCGGGATATACGTCAAATATGATGCCACTTTGCAGACAAGGACAGTCCGTGGTCACCCAGAGCGTGACTTGAGAAATGCTTTAGACTTTAAGAGACTAGTGTTTC	1	+	chr7:86196511-86196630
ACAN	BA_593036_001003	TCCGTGGTCACCCAGAGCGTGACTTGAGAAATGCTTTAGACTTTAAGAGACTAGTGTTTCCTAAGAAAATGTTTTTTAGTTTAATTTTTTAACAAAGAGATTGATGTTTCTAGAAAATAA	1	+	chr7:86196571-86196690
ACAN	BA_593036_001004	CTAAGAAAATGTTTTTTAGTTTAATTTTTTAACAAAGAGATTGATGTTTCTAGAAAATAACTCATAAGATTCCACTCTATTCTTCTAAAAAGCAAACACACTAGCCTCTGAGCAGCGCTG	1	+	chr7:86196631-86196750
ACAN	BA_593036_001005	CTCATAAGATTCCACTCTATTCTTCTAAAAAGCAAACACACTAGCCTCTGAGCAGCGCTGACTACCATTGAAATGTGCTGACTGTGACCCAGAGCAGCCAATATACAGGTGGGAAAGAAG	1	+	chr7:86196691-86196810
ACAN	BA_593036_001006	ACTACCATTGAAATGTGCTGACTGTGACCCAGAGCAGCCAATATACAGGTGGGAAAGAAGGCAGGCCACCCAACAGAACACCTGAGCCACAGCCCACCCTGGGCTTCACCCCCTGTACAA	1	+	chr7:86196751-86196870
ACAN	BA_593036_001007	GCAGGCCACCCAACAGAACACCTGAGCCACAGCCCACCCTGGGCTTCACCCCCTGTACAAGAAAGAAACAGTCAAAGAATGCTCTGGGCCAGGGCCAGTCCCAAAGACCACTAGCCAGTG	1	+	chr7:86196811-86196930
ACAN	BA_593036_001008	GAAAGAAACAGTCAAAGAATGCTCTGGGCCAGGGCCAGTCCCAAAGACCACTAGCCAGTGAGGTATGCACACAATTCCAGCATAGTCAACCTGGGGAAACTGAGGCACATCACTTCTGAC	1	+	chr7:86196871-86196990
ACAN	BA_593036_001009	AGGTATGCACACAATTCCAGCATAGTCAACCTGGGGAAACTGAGGCACATCACTTCTGACCTCTCATCAAGAAAAAACTTGGTCGGTTCTCTCTGTAGTCTGCAAAGAACCCACTTCTTG	1	+	chr7:86196931-86197050
ACAN	BA_593036_001010	CTCTCATCAAGAAAAAACTTGGTCGGTTCTCTCTGTAGTCTGCAAAGAACCCACTTCTTGCCCAGTGAGAGATTCGGGAGATTTCCACTGCACTGCCTGAGGCCACTGTGCTTTAATGAG	1	+	chr7:86196991-86197110
ACAN	BA_593036_001011	CCCAGTGAGAGATTCGGGAGATTTCCACTGCACTGCCTGAGGCCACTGTGCTTTAATGAGAAGAACACCCGCTTCCTCTCAAGGCCAGCAGCGGTCTGAATCCCCAGCCCCCAAACACAC	1	+	chr7:86197051-86197170
ACAN	BA_593036_001012	AAGAACACCCGCTTCCTCTCAAGGCCAGCAGCGGTCTGAATCCCCAGCCCCCAAACACACTGCAGCTTGCCCAGCTAGCTGCTCCTGTGAGGGGTGACCTTGACTTGAAGTTAGCCCCAA	1	+	chr7:86197111-86197230
ACAN	BA_593036_001013	TGCAGCTTGCCCAGCTAGCTGCTCCTGTGAGGGGTGACCTTGACTTGAAGTTAGCCCCAACTTGCTGGACAACTCCACCACTTTCTGAGCCCCATGGTATATGTGAGCATTGTTGGGAGG	1	+	chr7:86197171-86197290
ACAN	BA_593036_001014	CTTGCTGGACAACTCCACCACTTTCTGAGCCCCATGGTATATGTGAGCATTGTTGGGAGGTGAGAGGTAGTGTTGTAATATTTAACTTATTGGACTCGTTAGAGAAATTAAAATCACTGT	1	+	chr7:86197231-86197350
ACAN	BA_593036_001015	TGAGAGGTAGTGTTGTAATATTTAACTTATTGGACTCGTTAGAGAAATTAAAATCACTGTATGCTGCAACTAGCTTATAGAAGGGATCCAAAGACTCTTAGATTTTTCTTTTTCCGGGAA	1	+	chr7:86197291-86197410
ACAN	BA_593036_001016	ATGCTGCAACTAGCTTATAGAAGGGATCCAAAGACTCTTAGATTTTTCTTTTTCCGGGAAACAAATTTATTAAAGAGTGTTGTAGAGGCCAGGCCGTAGCGAATTCCTGCTTGAGATGTC	1	+	chr7:86197351-86197470
ACAN	BA_593036_001017	ACAAATTTATTAAAGAGTGTTGTAGAGGCCAGGCCGTAGCGAATTCCTGCTTGAGATGTCCTTGGTCTATGTTGCGTTTTGAAGACACCCCTCCCCGCGCCCTCAGCCTTGTGCCTTGTG	1	+	chr7:86197411-86197530
ACAN	BA_593036_001018	CTTGGTCTATGTTGCGTTTTGAAGACACCCCTCCCCGCGCCCTCAGCCTTGTGCCTTGTGCCTCTGTAGCTGCCTCATCTCCTCTCTCCGCCCTTGCGTCTCGGGGTACCCCACCCCCAA	1	+	chr7:86197471-86197590
ACAN	BA_593036_001019	CCTCTGTAGCTGCCTCATCTCCTCTCTCCGCCCTTGCGTCTCGGGGTACCCCACCCCCAAAACTTTCCAACAGTGTTCTATGAAGATTCTTTCAAATCGCATTCCCAGAGTAGGGGGTCG	1	+	chr7:86197531-86197650
ACAN	BA_593036_001020	AACTTTCCAACAGTGTTCTATGAAGATTCTTTCAAATCGCATTCCCAGAGTAGGGGGTCGTCCTGTGCGATGGCATCTTTCTGGGTATCAGCTGCAAATCGCATCCCGATACCAGGGAAA	1	+	chr7:86197591-86197710
ACAN	BA_593036_001021	TCCTGTGCGATGGCATCTTTCTGGGTATCAGCTGCAAATCGCATCCCGATACCAGGGAAACACCCCGACCCCAACCCCAGCACCGGACTGCTACCCTGACAGCAGGAGCCGGGTGCCTTC	1	+	chr7:86197651-86197770
ACAN	BA_593036_001022	CACCCCGACCCCAACCCCAGCACCGGACTGCTACCCTGACAGCAGGAGCCGGGTGCCTTCGGCACTCTGCGGGCGCAGCCCTCCGGGGCCGCCTGGACTGCGGAGCTGCCGACCGCAATG	2	+	chr7:86197711-86197830
ACAN	BA_593036_001023	GGCACTCTGCGGGCGCAGCCCTCCGGGGCCGCCTGGACTGCGGAGCTGCCGACCGCAATGCAGACGCGGGCCCTCCAGTGCTGCCCGCACAGCTTTCCTCCGCGGCCCCAGGAGCTGCGG	2	+	chr7:86197771-86197890
ACAN	BA_593036_001024	CAGACGCGGGCCCTCCAGTGCTGCCCGCACAGCTTTCCTCCGCGGCCCCAGGAGCTGCGGGGTCCGCGCTCCTCTCGTGCCCTGCGCGCCCGGAGCCTTCCCCAGCTGAGCGCGGTCCCC	2	+	chr7:86197831-86197950
ACAN	BA_593036_001025	GGTCCGCGCTCCTCTCGTGCCCTGCGCGCCCGGAGCCTTCCCCAGCTGAGCGCGGTCCCCAGCCCGGGTCCTGCGCGCTCCGGACGTTTCTGCCTTCCCCTCCCCCCGCAGATTGGCCCC	2	+	chr7:86197891-86198010
ACAN	BA_593036_001026	AGCCCGGGTCCTGCGCGCTCCGGACGTTTCTGCCTTCCCCTCCCCCCGCAGATTGGCCCCGGGGGTGGGGTTTCCCTGTGCGCTCGCCCCCACCCCTCGTGTGTGCCCTCCCCTCCCCCG	2	+	chr7:86197951-86198070
ACAN	BA_593036_001027	GGGGGTGGGGTTTCCCTGTGCGCTCGCCCCCACCCCTCGTGTGTGCCCTCCCCTCCCCCGCCCGCCCCTATGTATGTGTCACCGCGCACCATTCCCGCCCACCTACCTCCCCGCGGTGCC	2	+	chr7:86198011-86198130
ACAN	BA_593036_001028	CCCGCCCCTATGTATGTGTCACCGCGCACCATTCCCGCCCACCTACCTCCCCGCGGTGCCAGAGGGGCTCACAGAGCTGAGGACGCGTGCGGAACGGCTCAAGGTCCCTCACTCTCTCTC	2	+	chr7:86198071-86198190
ACAN	BA_593036_001029	AGAGGGGCTCACAGAGCTGAGGACGCGTGCGGAACGGCTCAAGGTCCCTCACTCTCTCTCCGCATCCTCGCCGGCTAGCATCTGACGCAGGTGCCGAGGGAGTTCGGGCACCTTTCTGTG	1	+	chr7:86198131-86198250
ACAN	BA_593036_001030	CGCATCCTCGCCGGCTAGCATCTGACGCAGGTGCCGAGGGAGTTCGGGCACCTTTCTGTGTCCCTTCCCTTCATCGACCCTGCTCCGAAACCTAGTCAGCCAGCCACCACTGCGGCCACC	1	+	chr7:86198191-86198310
ACAN	BA_593036_001031	TCCCTTCCCTTCATCGACCCTGCTCCGAAACCTAGTCAGCCAGCCACCACTGCGGCCACCGCCCGAGGGGACTTGCGGAGAAGACGCCGGCGGGAGAAGGGGTTCGCAGGGCCCCCCCCC	2	+	chr7:86198251-86198370
ACAN	BA_593036_001032	GCCCGAGGGGACTTGCGGAGAAGACGCCGGCGGGAGAAGGGGTTCGCAGGGCCCCCCCCCCCCCGCGCAGAGCATCCCTGCTGCAGCGCAGCAAGACCCGGGGCTGGCAGCCCCCAGGAA	2	+	chr7:86198311-86198430
ACAN	BA_593036_001033	CCCCGCGCAGAGCATCCCTGCTGCAGCGCAGCAAGACCCGGGGCTGGCAGCCCCCAGGAATCCCTAGCTGCTTCGCAGGGATAAAGGACTGAAGTTCTTGGAGGAGCGAGTCCAACTCTT	1	+	chr7:86198371-86198490
ACAN	BA_593036_001034	TCCCTAGCTGCTTCGCAGGGATAAAGGACTGAAGTTCTTGGAGGAGCGAGTCCAACTCTTCAAGGTAAAGAAAAGGCTCCTTCTCTCCAGGGGAGCTCTGTCCCAGGGCATCTGGGAATG	1	+	chr7:86198431-86198550
ACAN	BA_593036_001035	CAAGGTAAAGAAAAGGCTCCTTCTCTCCAGGGGAGCTCTGTCCCAGGGCATCTGGGAATGCTGCTGAGGACAGGCGCCTAGGTGCTGGGGGTGGCGTGCCTTGGTGCCCACATTGGGTAT	1	+	chr7:86198491-86198610
ACAN	BA_593036_001036	CTGCTGAGGACAGGCGCCTAGGTGCTGGGGGTGGCGTGCCTTGGTGCCCACATTGGGTATGTGTGTTGAGACTCTCACGACCTCCGCTGCATGCACACGGAAGTTGAGCAAACTCAACTG	1	+	chr7:86198551-86198670
ACAN	BA_593036_001037	GTGTGTTGAGACTCTCACGACCTCCGCTGCATGCACACGGAAGTTGAGCAAACTCAACTGCTGCCCGGACTCAAAGTGAATGGGAACACGTGGAGGGGCTCCAGCTCTGAGTACACAGAA	1	+	chr7:86198611-86198730
ACAN	BA_593036_001038	CTGCCCGGACTCAAAGTGAATGGGAACACGTGGAGGGGCTCCAGCTCTGAGTACACAGAATTAAGAAAGACCAGAGATTTTTCAAGTTTAAGGTATGGGGGCGCTAAACTGAAGTGTAGA	1	+	chr7:86198671-86198790
ACAN	BA_593036_001039	TTAAGAAAGACCAGAGATTTTTCAAGTTTAAGGTATGGGGGCGCTAAACTGAAGTGTAGAGCGAGTAGCAGTTTTAAAGCCAAGGAAATGTGGGTTCAAATCCCACTCCCCCCCCCAACG	1	+	chr7:86198731-86198850
ACAN	BA_593036_001040	GCGAGTAGCAGTTTTAAAGCCAAGGAAATGTGGGTTCAAATCCCACTCCCCCCCCCAACGCGCCCCCCCCCCCTGTCCTCTGGGTGCCCCATAAGGCTTTCATCTTCTCTTGGGAAGGCC	1	+	chr7:86198791-86198910
ACAN	BA_593036_001041	CGCCCCCCCCCCCTGTCCTCTGGGTGCCCCATAAGGCTTTCATCTTCTCTTGGGAAGGCCAATTGACCAGAGAATCAACAAAGTTACATGAACAGCTGATCAGATAGGCGGCAGATACCT	1	+	chr7:86198851-86198970
ACAN	BA_593036_001042	AATTGACCAGAGAATCAACAAAGTTACATGAACAGCTGATCAGATAGGCGGCAGATACCTGAGAAAGGATGAGAAAACTCGTGGGTCCCATTGGGTTTATGGCAGGGATCTCAGGATACT	1	+	chr7:86198911-86199030
ACAN	BA_593036_001043	GAGAAAGGATGAGAAAACTCGTGGGTCCCATTGGGTTTATGGCAGGGATCTCAGGATACTCAAAGCGGTAGGAAAGAGGAGGAAAGATATCAGCTGAGTCTGGGACAGGGCTACTGCTCC	1	+	chr7:86198971-86199090
ACAN	BA_593036_001044	CAAAGCGGTAGGAAAGAGGAGGAAAGATATCAGCTGAGTCTGGGACAGGGCTACTGCTCCCAGGGGAGATCGGGCGTTTGTCGAGGTGGAAAGAAGACATGGGGATGCAGGACGGTCCCG	1	+	chr7:86199031-86199150
ACAN	BA_593036_001045	CAGGGGAGATCGGGCGTTTGTCGAGGTGGAAAGAAGACATGGGGATGCAGGACGGTCCCGAAGTTTTTCCATTTCTGCGCTTTTCTGCAACCCTTCCAATACCAGGGCTGGGTGGGAGGG	1	+	chr7:86199091-86199210
ACAN	BA_593036_001046	AAGTTTTTCCATTTCTGCGCTTTTCTGCAACCCTTCCAATACCAGGGCTGGGTGGGAGGGTGACAGCGTGTCAGTAAGCTGTGGGTGTGGAGGGCTGTCTGCTTCAGGAAGAAGAATCCC	1	+	chr7:86199151-86199270
ACAN	BA_593036_001047	TGACAGCGTGTCAGTAAGCTGTGGGTGTGGAGGGCTGTCTGCTTCAGGAAGAAGAATCCCGCCCAAATTATTCGGACTTGCTGCTGCCCGCAATCCGGAGCTAGGCTCTGGAGCGGGCAT	1	+	chr7:86199211-86199330
ACAN	BA_593036_001048	GCCCAAATTATTCGGACTTGCTGCTGCCCGCAATCCGGAGCTAGGCTCTGGAGCGGGCATTCACTAGTCTCACTATAGAGCATCTCAGGTCCCAGAGGTTTGGTGGGCATGTTAATTCCA	1	+	chr7:86199271-86199390
ACAN	BA_593036_001049	TCACTAGTCTCACTATAGAGCATCTCAGGTCCCAGAGGTTTGGTGGGCATGTTAATTCCAGTTCTGTGGGGTGGGGAGTGTCAGTGGGAGGCAACGGGAAGATCTTCTGTGAGGTAGCTT	1	+	chr7:86199331-86199450
ACAN	BA_593036_001050	GTTCTGTGGGGTGGGGAGTGTCAGTGGGAGGCAACGGGAAGATCTTCTGTGAGGTAGCTTGCCTTGGTGCTTCTGCCTCTGGGTGTTGCAGTGGGCTGGTGTCTAGACCCTGAAAAGCAC	1	+	chr7:86199391-86199510
ACAN	BA_593036_001051	GCCTTGGTGCTTCTGCCTCTGGGTGTTGCAGTGGGCTGGTGTCTAGACCCTGAAAAGCACCTATGGCATCTCCCCTAGGGAAGGGAATCTACAACAATGCAATGACTTTTTACAGGTCAT	1	+	chr7:86199451-86199570
ACAN	BA_593036_001052	CTATGGCATCTCCCCTAGGGAAGGGAATCTACAACAATGCAATGACTTTTTACAGGTCATTGATTTAGGGACAGAGTCAGAATTAGGGTCTAGATTTTTGAGGCTGAAGTCAGCTCCTCT	1	+	chr7:86199511-86199630
ACAN	BA_593036_001053	TGATTTAGGGACAGAGTCAGAATTAGGGTCTAGATTTTTGAGGCTGAAGTCAGCTCCTCTGCCGATTTAAGGGAAGAGAAGTCACCGCCTTAATCCTCTCTCTTCCTTGCCTCTGGTTAC	1	+	chr7:86199571-86199690
ACAN	BA_593036_001054	GCCGATTTAAGGGAAGAGAAGTCACCGCCTTAATCCTCTCTCTTCCTTGCCTCTGGTTACCATGACAAGGAGTCGTCTAGTTGCCTATTTGTCCTGGCAAGGCTAGTTGGGGGTGGGGGG	1	+	chr7:86199631-86199750
ACAN	BA_593036_001055	CATGACAAGGAGTCGTCTAGTTGCCTATTTGTCCTGGCAAGGCTAGTTGGGGGTGGGGGGCGCTCTCAGTCACCAAGCCTAAGGAGATTCTACTCACCTAAAGAAAACATTACAGAATAA	1	+	chr7:86199691-86199810
ACTA1	BA_593036_002226	AGGGCATAGCCCTCATAGATGGGCACGTTGTGGGTGACACCGTCCCCAGAATCCAACACGATGCCTGTGCAGGGGAGAGGCAGTATGTGAGTGGAGGGGACCAGCAGGCGGCGCAGGTCG	1	+	chr8:126416831-126416950
ACTA1	BA_593036_002227	ATGCCTGTGCAGGGGAGAGGCAGTATGTGAGTGGAGGGGACCAGCAGGCGGCGCAGGTCGGGATACTGCAGAGGATTAAAAAGCGGGGCTGGAATGTTGGAGCAATCCTACCAGGGCCAG	1	+	chr8:126416891-126417010
ACTA1	BA_593036_002228	GGATACTGCAGAGGATTAAAAAGCGGGGCTGGAATGTTGGAGCAATCCTACCAGGGCCAGCGTGGGCCATGTGTGGGCCATGTGTGAGCGCTTACCGGTGGTACGGCCGGAAGCATAGAG	1	+	chr8:126416951-126417070
ACTA1	BA_593036_002229	CGTGGGCCATGTGTGGGCCATGTGTGAGCGCTTACCGGTGGTACGGCCGGAAGCATAGAGGGACAGCACCGCCTGGATAGCCACATACATGGCAGGCACGTTGAAGGTCTCAAACATGAT	1	+	chr8:126417011-126417130
ACTA1	BA_593036_002230	GGACAGCACCGCCTGGATAGCCACATACATGGCAGGCACGTTGAAGGTCTCAAACATGATTTGAGTCATCTTCTCCCGGTTAGCTTTGGGGTTCAGGGGGGCCTCGGTGAGCAGAGTCGG	1	+	chr8:126417071-126417190
ACTA1	BA_593036_002231	TTGAGTCATCTTCTCCCGGTTAGCTTTGGGGTTCAGGGGGGCCTCGGTGAGCAGAGTCGGGTGCTCCTCAGGGGCCACACGCAGCTCATTGTAGAAGGTGTGGTGCCAGATCTTCTCCAT	1	+	chr8:126417131-126417250
ACTA1	BA_593036_002232	GTGCTCCTCAGGGGCCACACGCAGCTCATTGTAGAAGGTGTGGTGCCAGATCTTCTCCATGTCGTCCCAGTTGGTGATGATGCCATGTTCAATGGGGTACTTCAGGGTCAGGATACCTCG	1	+	chr8:126417191-126417310
ACTA1	BA_593036_002233	GTCGTCCCAGTTGGTGATGATGCCATGTTCAATGGGGTACTTCAGGGTCAGGATACCTCGCTTGCTCTGGGCCTCATCACCCACGTAGGAGTCCTTCTGACCCATACCTACCATGACACC	1	+	chr8:126417251-126417370
ACTA1	BA_593036_002234	CTTGCTCTGGGCCTCATCACCCACGTAGGAGTCCTTCTGACCCATACCTACCATGACACCCTGCAGATAGAGACATCAGACACTTGTTACTACAGCCAGGGGTGAGGAGAACATTGGCTG	1	+	chr8:126417311-126417430
ACTA1	BA_593036_002235	CTGCAGATAGAGACATCAGACACTTGTTACTACAGCCAGGGGTGAGGAGAACATTGGCTGGATTCAGAGAGCCTATCTTTCCCTGCCAGCAGCCTGACCTGGTGACGGGGTCGGCCCACG	1	+	chr8:126417371-126417490
ACTA1	BA_593036_002236	GATTCAGAGAGCCTATCTTTCCCTGCCAGCAGCCTGACCTGGTGACGGGGTCGGCCCACGATGGATGGGAACACAGCCCTGGGGGCATCATCCCCGGCAAAGCCAGCTTTCACCAGGCCA	1	+	chr8:126417431-126417550
ACTA1	BA_593036_002237	ATGGATGGGAACACAGCCCTGGGGGCATCATCCCCGGCAAAGCCAGCTTTCACCAGGCCAGAGCCGTTGTCACACACAAGAGCGGTGGTCTCGTCTTCGTCGCACATGGTGTCTAGTTTC	1	+	chr8:126417491-126417610
ACTA1	BA_593036_002238	GAGCCGTTGTCACACACAAGAGCGGTGGTCTCGTCTTCGTCGCACATGGTGTCTAGTTTCTGCAAAGACAAGGTGTTGAGTGCTGTGTATATGTGATGGGGGGGGGGGGTTAGGGTGAGG	1	+	chr8:126417551-126417670
ACTA1	BA_593036_002239	TGCAAAGACAAGGTGTTGAGTGCTGTGTATATGTGATGGGGGGGGGGGGTTAGGGTGAGGCTCCGCTTAACCCATCTTCACTTTGGAGATCCAAAAACTCCTTTCCCCCTTCCCCTTCCT	1	+	chr8:126417611-126417730
ACTA1	BA_593036_002240	CTCCGCTTAACCCATCTTCACTTTGGAGATCCAAAAACTCCTTTCCCCCTTCCCCTTCCTTGCACGGGGGTCAGAGGATGCTCTTCCAGCTTAAGGCTGTGCTTTCGCTATGGGGGAGCT	1	+	chr8:126417671-126417790
ACTA1	BA_593036_002241	TGCACGGGGGTCAGAGGATGCTCTTCCAGCTTAAGGCTGTGCTTTCGCTATGGGGGAGCTGTCTGTGGATCACACTAAGTCCTCCAACTAGGCATGCAGGGGATATCCTGAGACCCTCTA	1	+	chr8:126417731-126417850
ACTA1	BA_593036_002242	GTCTGTGGATCACACTAAGTCCTCCAACTAGGCATGCAGGGGATATCCTGAGACCCTCTACATTCATTGTAGGCCACCACACACACCACAGCTAGCACTAGTCCTATCCTCTCTGCTCAC	1	+	chr8:126417791-126417910
ACTA1	BA_593036_002243	CATTCATTGTAGGCCACCACACACACCACAGCTAGCACTAGTCCTATCCTCTCTGCTCACAATCTCATCTGTGAAGGAGGTATTAAGGCACGCTGCCCACCACCTGCCTGTCCTGTGAGA	1	+	chr8:126417851-126417970
ACTA1	BA_593036_002244	AATCTCATCTGTGAAGGAGGTATTAAGGCACGCTGCCCACCACCTGCCTGTCCTGTGAGAGGGTCGAGGATTCTGCCCGGGGAAGGGCGATATTGTCACAACTATGGAAAAGCTGTTGAA	1	+	chr8:126417911-126418030
ACTA1	BA_593036_002245	GGGTCGAGGATTCTGCCCGGGGAAGGGCGATATTGTCACAACTATGGAAAAGCTGTTGAACACTCACAGCATCCCAAACTCAGAAGAAACCCTTCCACCTGTCTCCCATTTCAGAGAAGA	1	+	chr8:126417971-126418090
ACTA1	BA_593036_002246	CACTCACAGCATCCCAAACTCAGAAGAAACCCTTCCACCTGTCTCCCATTTCAGAGAAGAGTAGCCAGGGTTGCTGCCCTTTAGAAAAGCCTTGATCTCAAAGGGAGTCGCCCCAAGGCT	1	+	chr8:126418031-126418150
ACTA1	BA_593036_002247	GTAGCCAGGGTTGCTGCCCTTTAGAAAAGCCTTGATCTCAAAGGGAGTCGCCCCAAGGCTAAGGCCAGGCTTGACTCTCTCCAAGCTCATCTTCAAATCAGTCTCCCAGGAGCTGGGGTG	1	+	chr8:126418091-126418210
ACTA1	BA_593036_002248	CCAGCAGAGAAAGAGGGGAAAGGGGAATGAAAAGCCGGAAAGAAATCTCAACCAACCAGAGGCTGGCGTGTGGCTCAGTAGGAGAGCACCGGCTTGTTCACTTGCAGGACTTGGATTTAG	1	+	chr8:126418266-126418385
ACTA1	BA_593036_002249	GGCTGGCGTGTGGCTCAGTAGGAGAGCACCGGCTTGTTCACTTGCAGGACTTGGATTTAGTCCCCAGTAAGAGGGGAGGGAGGAGTCTGCGGGTGGTAATGGATAGATGTCAGACCCCCA	1	+	chr8:126418326-126418445
ACTA1	BA_593036_002250	TCCCCAGTAAGAGGGGAGGGAGGAGTCTGCGGGTGGTAATGGATAGATGTCAGACCCCCAGGCATATCCTAAATGCCCAGTCAGCAGCCCAAATGGGCTGGATGTGAGTTTGGAGAAATT	1	+	chr8:126418386-126418505
ACTA1	BA_593036_002251	GGCATATCCTAAATGCCCAGTCAGCAGCCCAAATGGGCTGGATGTGAGTTTGGAGAAATTTCCAGAACTCAGTGCTAAATACAAGCCCAAGGCTCAATAGCTTTCTTTGCTGGGTCTCCA	1	+	chr8:126418446-126418565
ACTA1	BA_593036_002252	TCCAGAACTCAGTGCTAAATACAAGCCCAAGGCTCAATAGCTTTCTTTGCTGGGTCTCCAGGTCACCCTCCCCACCTCCACCCTACCTGCTGCTCTGACTCTGGCCCTGGGTGCCGAGGG	1	+	chr8:126418506-126418625
ACTA1	BA_593036_002253	GGTCACCCTCCCCACCTCCACCCTACCTGCTGCTCTGACTCTGGCCCTGGGTGCCGAGGGTAGGAAGTGAGGCTTCACGTCCGTGTGACCGCCTGTCCCCTTGCACAGGTTTTTATATAG	1	+	chr8:126418566-126418685
ACTA1	BA_593036_002254	TAGGAAGTGAGGCTTCACGTCCGTGTGACCGCCTGTCCCCTTGCACAGGTTTTTATATAGTCCCGGGAGCTCTCCCCACACCGCCCCGAAGGAATGTTGCTGCCCTTCCCAAGCCATATT	1	+	chr8:126418626-126418745
ACTA1	BA_593036_002255	TCCCGGGAGCTCTCCCCACACCGCCCCGAAGGAATGTTGCTGCCCTTCCCAAGCCATATTTGGGTGTCGGGCACTAGAGTCCCTTCCTTCGGCTGGTTCTCAGCCTGGGTCCCCGCCCGG	2	+	chr8:126418686-126418805
ACTA1	BA_593036_002256	TGGGTGTCGGGCACTAGAGTCCCTTCCTTCGGCTGGTTCTCAGCCTGGGTCCCCGCCCGGGTCTCCTGCACTGACCAAAGAAGGAGAGGACTGGCCCTGGCCCAGGTAGCTAGGACCGGA	2	+	chr8:126418746-126418865
ACTA1	BA_593036_002257	GTCTCCTGCACTGACCAAAGAAGGAGAGGACTGGCCCTGGCCCAGGTAGCTAGGACCGGACCAGGCCGTATATGGAGAGTATCCCCAGCTGTCTGCCCCTCCCAACTGGCTCCAAGGCTC	1	+	chr8:126418806-126418925
ACTA1	BA_593036_002258	CCAGGCCGTATATGGAGAGTATCCCCAGCTGTCTGCCCCTCCCAACTGGCTCCAAGGCTCACGGAAGGGCTGTGCTGGGCCAAAGGTCACTGCTTTGCAGACTGCTGGTCTGTACTTCCC	1	+	chr8:126418866-126418985
ACTA1	BA_593036_002259	ACGGAAGGGCTGTGCTGGGCCAAAGGTCACTGCTTTGCAGACTGCTGGTCTGTACTTCCCAAGATTTACCTGTTTGAAAGGTCTCCCCAGTTCTGCCCACCTGGACACACGATTGCTGAC	1	+	chr8:126418926-126419045
ACTA1	BA_593036_002260	AAGATTTACCTGTTTGAAAGGTCTCCCCAGTTCTGCCCACCTGGACACACGATTGCTGACCTGCCACAATGCACCCCATTTATGGGTTCTTAACTCAGACTACTAAGCCTTGATGCTTAA	1	+	chr8:126418986-126419105
ACTA1	BA_593036_002261	CTGCCACAATGCACCCCATTTATGGGTTCTTAACTCAGACTACTAAGCCTTGATGCTTAAGCTCAGGGGAGGTAGCCCTGTGGTCAGGTGAGCCGGGAGGAGTCATGGGCTCCAGGTAGG	1	+	chr8:126419046-126419165
ACTA1	BA_593036_002262	GCTCAGGGGAGGTAGCCCTGTGGTCAGGTGAGCCGGGAGGAGTCATGGGCTCCAGGTAGGGATGGAAAATAAGCCCCACATTTGAACTCCATTTTCTTTCCCACTTTGAAGCTCCCCCAA	1	+	chr8:126419106-126419225
ACTA1	BA_593036_002263	GATGGAAAATAAGCCCCACATTTGAACTCCATTTTCTTTCCCACTTTGAAGCTCCCCCAATCCAGAGATCTGACACACATCACCCCCATTCACCCCCACAAGGCTGTCAGTCAGTGTAGG	1	+	chr8:126419166-126419285
ACTA1	BA_593036_002264	TCCAGAGATCTGACACACATCACCCCCATTCACCCCCACAAGGCTGTCAGTCAGTGTAGGATATGCAGCTGTCACTGGGCAGACAACTGGTGGAAGAGGGGGAGGAGGTAGTGAGAGGAG	1	+	chr8:126419226-126419345
ACTA1	BA_593036_002265	ATATGCAGCTGTCACTGGGCAGACAACTGGTGGAAGAGGGGGAGGAGGTAGTGAGAGGAGGCATGGGGACTATGTGGCCCTGGCACACAGAATGGGAGGCCAGGGCATTAGAGCTGTCCC	1	+	chr8:126419286-126419405
ACTA1	BA_593036_002266	GCATGGGGACTATGTGGCCCTGGCACACAGAATGGGAGGCCAGGGCATTAGAGCTGTCCCTGCATTCTGCAGTGTACTCTTGAAAGGAATGGAAGGGTCAGTGTGTGTGTGTGTGTGTGT	1	+	chr8:126419346-126419465
ACTA1	BA_593036_002267	TGTGTGTGTGTGTGTGTGTAAATCCCAAACTCGGGATTGACCGTCATCGAGTTGGCTAGGCTGAGCAAATGCTACCCCTTCTTTGGTGGCACTAAGCTTCCCTCCCCTGGGTCTGAAAGA	1	+	chr8:126419473-126419592
ACTA1	BA_593036_002268	CTGAGCAAATGCTACCCCTTCTTTGGTGGCACTAAGCTTCCCTCCCCTGGGTCTGAAAGAAGGATCATACCTGGAACTGTTGGGACCTAGAGGGGGCTGAGGCAGAGAGAGGTGCTGATG	1	+	chr8:126419533-126419652
ACTA1	BA_593036_002269	AGGATCATACCTGGAACTGTTGGGACCTAGAGGGGGCTGAGGCAGAGAGAGGTGCTGATGAAGATATACCTTCTAAGGAGCACTAAGACCTTACACTGGTGCCCAGGAGCGGCCCCTCCC	1	+	chr8:126419593-126419712
ACTA1	BA_593036_002270	AAGATATACCTTCTAAGGAGCACTAAGACCTTACACTGGTGCCCAGGAGCGGCCCCTCCCAGGCAGACTCATCTTTATATTTAGAGGATGATGCCCGTCAGCCCGGCTGCTTCCCATGCA	1	+	chr8:126419653-126419772
ACTA1	BA_593036_002271	AGGCAGACTCATCTTTATATTTAGAGGATGATGCCCGTCAGCCCGGCTGCTTCCCATGCACCTTGGGGCCACCACCTGCCAGGCTTGTGTGGGTTCTATTTATACCGCTGATAGATGGGA	1	+	chr8:126419713-126419832
ACTA1	BA_593036_002272	CCTTGGGGCCACCACCTGCCAGGCTTGTGTGGGTTCTATTTATACCGCTGATAGATGGGAATCTGCTTTTGGGTTTCTAGAAGGAGCAACTTATGGAAGCTGGGATGGGGGTGAGTAGAG	1	+	chr8:126419773-126419892
ACTA1	BA_593036_002273	ATCTGCTTTTGGGTTTCTAGAAGGAGCAACTTATGGAAGCTGGGATGGGGGTGAGTAGAGGTCATCTCTTGGCGCCTGTCTCAATTTGGGCAGGGAGAGGGATAAGAAAGCCCAAAGGAA	1	+	chr8:126419833-126419952
ACTC1	BA_593036_003091	AATTTTAACAAATTATTTAGACTATTGTTATATACTTCATCTCCACAAGAGGAAGTGTGTCGATTAATTTGATTACAACTGTGGAGGAGAGAATAAAGGATTTACTGAGGAAGCAGAGTC	1	+	chr2:113876633-113876752
ACTC1	BA_593036_003092	CGATTAATTTGATTACAACTGTGGAGGAGAGAATAAAGGATTTACTGAGGAAGCAGAGTCTTATCTTGTTCTTGGAATAGCATAATGACTTCATTAAATTACTAAGCCTATCACTGATGT	1	+	chr2:113876693-113876812
ACTC1	BA_593036_003093	TTATCTTGTTCTTGGAATAGCATAATGACTTCATTAAATTACTAAGCCTATCACTGATGTCACCTAAGAAGTAGATGGCTGTCTTTTGGCACAACTGAATTAATGATGTCATTACATCTT	1	+	chr2:113876753-113876872
ACTC1	BA_593036_003094	CACCTAAGAAGTAGATGGCTGTCTTTTGGCACAACTGAATTAATGATGTCATTACATCTTCTAGTCCCCTTAAGAAAAGATTTTGACACTCATCCACTGTACATAGGCTGACAGGCTGCT	1	+	chr2:113876813-113876932
ACTC1	BA_593036_003095	CTAGTCCCCTTAAGAAAAGATTTTGACACTCATCCACTGTACATAGGCTGACAGGCTGCTATCTCTCAGATGGAAAGTCAAACCCTCAGAGTATCCTGGAGTAGCCTTCACTGGCCAAGC	1	+	chr2:113876873-113876992
ACTC1	BA_593036_003096	ATCTCTCAGATGGAAAGTCAAACCCTCAGAGTATCCTGGAGTAGCCTTCACTGGCCAAGCCTGAGGACTCTAGCTCTGCTCTCTGGCAGCCTGTCTGGCCAAGCATGCGACAAACCCAGC	1	+	chr2:113876933-113877052
ACTC1	BA_593036_003097	CTGAGGACTCTAGCTCTGCTCTCTGGCAGCCTGTCTGGCCAAGCATGCGACAAACCCAGCGAGTGTGGCATTTCTTTTAATAAACAAGGTGGAATGCCACTATCGCTATGGCACTTGTTG	1	+	chr2:113876993-113877112
ACTC1	BA_593036_003098	GAGTGTGGCATTTCTTTTAATAAACAAGGTGGAATGCCACTATCGCTATGGCACTTGTTGCTCTGGTCACATCTGACTTCTAAAAATGCAACACCCAGGAAGGAGATCAATTACAGCTTT	1	+	chr2:113877053-113877172
ACTC1	BA_593036_003099	CTCTGGTCACATCTGACTTCTAAAAATGCAACACCCAGGAAGGAGATCAATTACAGCTTTGGGGAGTCCTGTAAAACTGGCTGTGAACAAGAAGGAAGAATGTAGATCGGGAACTAGTTA	1	+	chr2:113877113-113877232
ACTC1	BA_593036_003100	GGGGAGTCCTGTAAAACTGGCTGTGAACAAGAAGGAAGAATGTAGATCGGGAACTAGTTATTTCCAAGTAGTTATATTACTAGCAGTTAGCTCCATTGTTTAAACTAAACTGAACAGACG	1	+	chr2:113877173-113877292
ACTC1	BA_593036_003101	TTTCCAAGTAGTTATATTACTAGCAGTTAGCTCCATTGTTTAAACTAAACTGAACAGACGAAGGGCCGAGGGCCAAAAAGAAATCCAGGTTCAGAGACACAGGACACTGCAGTTGAAAAC	1	+	chr2:113877233-113877352
ACTC1	BA_593036_003102	AAGGGCCGAGGGCCAAAAAGAAATCCAGGTTCAGAGACACAGGACACTGCAGTTGAAAACCCACAGGTCCAGAATGAGAAACTGGTGGCCTTTCACAAGAGAGAGCTGACCCATCAACAG	1	+	chr2:113877293-113877412
ACTC1	BA_593036_003103	CCACAGGTCCAGAATGAGAAACTGGTGGCCTTTCACAAGAGAGAGCTGACCCATCAACAGGTGTGCCACTGCAGTGGACTTCTTGGAATCTGGAGGTTGGCAGGGAGTTGCGTGGGATGG	1	+	chr2:113877353-113877472
ACTC1	BA_593036_003104	GTGTGCCACTGCAGTGGACTTCTTGGAATCTGGAGGTTGGCAGGGAGTTGCGTGGGATGGCTTGGATGTGTAATTCATCATTGCCTTTCATGTATGACTTAAGGAGTCTCTGAACAGTCA	1	+	chr2:113877413-113877532
ACTC1	BA_593036_003105	CTTGGATGTGTAATTCATCATTGCCTTTCATGTATGACTTAAGGAGTCTCTGAACAGTCAGGTCAAGAGAGGCACTTCACAGATTGCTGGACTGGAGGGGGGGGGGTGTCAAGAAGGGGC	1	+	chr2:113877473-113877592
ACTC1	BA_593036_003106	GGTCAAGAGAGGCACTTCACAGATTGCTGGACTGGAGGGGGGGGGGTGTCAAGAAGGGGCCCAGAATATGGATGGAGAGCAGGCTAGGAGGGACGGAGAGTGTTACCTGGTGACGTGGGC	1	+	chr2:113877533-113877652
ACTC1	BA_593036_003107	CCAGAATATGGATGGAGAGCAGGCTAGGAGGGACGGAGAGTGTTACCTGGTGACGTGGGCGACCCACGATGGACGGGAAGACAGCTCTGGGGGCGTCATCACCCGCAAAGCCGGCCTTCA	1	+	chr2:113877593-113877712
ACTC1	BA_593036_003108	GACCCACGATGGACGGGAAGACAGCTCTGGGGGCGTCATCACCCGCAAAGCCGGCCTTCACCAGCCCGGAGCCATTGTCACACACCAAAGCGGTGGTCTCCTCGTCGTCACACATCCTGG	1	+	chr2:113877653-113877772
ACTC1	BA_593036_003109	CCAGCCCGGAGCCATTGTCACACACCAAAGCGGTGGTCTCCTCGTCGTCACACATCCTGGCACAGCTTTGGTGGGTTCTGTAGGCTAAGGAAAGAAGAGTGGTCCACACTCAGTGCTTGC	1	+	chr2:113877713-113877832
ACTC1	BA_593036_003110	CACAGCTTTGGTGGGTTCTGTAGGCTAAGGAAAGAAGAGTGGTCCACACTCAGTGCTTGCAGGGCTGGCCTGCTCCTTTAGAGGGAAGAGTGACGGAAGGGCCCAGTGGGGTTATTGGAT	1	+	chr2:113877773-113877892
ACTC1	BA_593036_003111	AGGGCTGGCCTGCTCCTTTAGAGGGAAGAGTGACGGAAGGGCCCAGTGGGGTTATTGGATTGTAGAAAGTAAGGAGACAATTGTATTCTTCTTTATGCTCAAGACCAAAAAAAAAAAAAA	1	+	chr2:113877833-113877952
ACTC1	BA_593036_003112	AAAGCTAAAAGCGTTGGGAGAAGCAGGGAGAGTGTCCCTGTGGATGACAGAAGGCTGGTGAGACCCCACTCACGCTCTTCTGGTCAAGAGGCTCACCCTACACCCTGGGCTGCAAGGAGC	1	+	chr2:113877962-113878081
ACTC1	BA_593036_003113	AGACCCCACTCACGCTCTTCTGGTCAAGAGGCTCACCCTACACCCTGGGCTGCAAGGAGCCATGTTCTTAAGCACAGGGAAGTCCTTTCCTTTCAGCTCCTTTCAGCTCTCCACATTTTC	1	+	chr2:113878022-113878141
ACTC1	BA_593036_003114	CATGTTCTTAAGCACAGGGAAGTCCTTTCCTTTCAGCTCCTTTCAGCTCTCCACATTTTCACCAACAGAAAACCCATTCTCCCTCCCTAGCCATACATGGGGACTGGGTGAAAGTGCTAA	1	+	chr2:113878082-113878201
ACTC1	BA_593036_003115	ACCAACAGAAAACCCATTCTCCCTCCCTAGCCATACATGGGGACTGGGTGAAAGTGCTAAAGATCAGTGAAGCCACAAAAGCTCAGGAGGTGAGATGGAGTGAGCTCTTGTGCTGTGGAG	1	+	chr2:113878142-113878261
ACTC1	BA_593036_003116	AGATCAGTGAAGCCACAAAAGCTCAGGAGGTGAGATGGAGTGAGCTCTTGTGCTGTGGAGGTTTCATGAGATCCAGAGCAACAACAAAAAGTCAGAACCTCACCAAAAAGTTTGCTTAAC	1	+	chr2:113878202-113878321
ACTC1	BA_593036_003117	ATAAAAACAACAAAACCCTCCAAAACTAAGAGTGTGGGATCCAAGAGCACAAAAGCACAGTGCTGACAAGGTCCTGCAGGGAGCAAGGCTGGGACTCACCGTGCTAGGGGCGGCTGGATT	1	+	chr2:113878399-113878518
ACTC1	BA_593036_003118	TGCTGACAAGGTCCTGCAGGGAGCAAGGCTGGGACTCACCGTGCTAGGGGCGGCTGGATTCAGCTGGGCTGGCGCTGGTGGCAGGCACTGGGTGTCAGTCGCCTGGAGCGCAGCTTTATA	1	+	chr2:113878459-113878578
ACTC1	BA_593036_003119	CAGCTGGGCTGGCGCTGGTGGCAGGCACTGGGTGTCAGTCGCCTGGAGCGCAGCTTTATAGCTCTCTGATGGACGGGGTCAGTTGGAGCAGCCGGGGGCAGGGGTGGGGGGCCCCTGATC	2	+	chr2:113878519-113878638
ACTC1	BA_593036_003120	GCTCTCTGATGGACGGGGTCAGTTGGAGCAGCCGGGGGCAGGGGTGGGGGGCCCCTGATCTGCCACCTTGCCTTATTTGGTCGCCTTAGCACCATCTAGGACCGCTGAGGCCATTCTTGG	1	+	chr2:113878579-113878698
ACTC1	BA_593036_003121	TGCCACCTTGCCTTATTTGGTCGCCTTAGCACCATCTAGGACCGCTGAGGCCATTCTTGGAGCCAAGGGCAGGGTAGAGGATCAGCCAGGGGGCTCCCAGACCATGTAAGGAAGGGGAGG	1	+	chr2:113878639-113878758
ACTC1	BA_593036_003122	AGCCAAGGGCAGGGTAGAGGATCAGCCAGGGGGCTCCCAGACCATGTAAGGAAGGGGAGGGGGCAGTCAGAGCAATGGCCATATAGGGAGCTAGGGAGGGGCAGGCCAGCAAGGGGTGGG	1	+	chr2:113878699-113878818
ACTC1	BA_593036_003123	GGGCAGTCAGAGCAATGGCCATATAGGGAGCTAGGGAGGGGCAGGCCAGCAAGGGGTGGGGGACGGGGAAAGGCTATGTGATGCCAATGCGCCCCTTGGGGTGGGGGAGCTCCCTAGTTG	1	+	chr2:113878759-113878878
ACTC1	BA_593036_003124	GGACGGGGAAAGGCTATGTGATGCCAATGCGCCCCTTGGGGTGGGGGAGCTCCCTAGTTGTGGAGTGGGCTTATTGCTCTTCAGCCCTTCCAAACTAAGGGACAATGAGTCACACACACA	1	+	chr2:113878819-113878938
ACTN2	BA_593036_003749	CACAAAGAGTAAAGACATGGCCTCAGAAACTGAGGATGTCTATACCTTCTTTGTACTGTATTTTCTTAGAATCAACAGAAACTTCTAGACTCAGACTTTGGCTTTCAAAAATGATGGGTA	1	+	chr13:12431077-12431196
ACTN2	BA_593036_003750	TTTTCTTAGAATCAACAGAAACTTCTAGACTCAGACTTTGGCTTTCAAAAATGATGGGTAATCTTCTTGTTCCATTCCTAATCTTATTATTGTTTTCCATAAGAAATGAACAATCTTCAA	1	+	chr13:12431137-12431256
ACTN2	BA_593036_003751	ATCTTCTTGTTCCATTCCTAATCTTATTATTGTTTTCCATAAGAAATGAACAATCTTCAAAGCAAAAACACAGAAGCAGAGATCTTTTTTAATCCATGAAAAAAAAGTAATCAAACTTGT	1	+	chr13:12431197-12431316
ACTN2	BA_593036_003752	AGCAAAAACACAGAAGCAGAGATCTTTTTTAATCCATGAAAAAAAAGTAATCAAACTTGTTGAAAAAATGTTTAAAAAGAAATGAGACACTCATTGCTGTAATTAAAACCACTCTTCAAC	1	+	chr13:12431257-12431376
ACTN2	BA_593036_003753	TGAAAAAATGTTTAAAAAGAAATGAGACACTCATTGCTGTAATTAAAACCACTCTTCAACTTCTTACCAAGTGGTTACATCCAGATGGCACAAGTGTAACCCTCAGGGCCATGGGCATCC	1	+	chr13:12431317-12431436
ACTN2	BA_593036_003754	TTCTTACCAAGTGGTTACATCCAGATGGCACAAGTGTAACCCTCAGGGCCATGGGCATCCCTCTTGGTAAGCCCTTTAATTAGACTCTATTTCTAAATGTATCAGTCTCCATCCCTTGTT	1	+	chr13:12431377-12431496
ACTN2	BA_593036_003755	CTCTTGGTAAGCCCTTTAATTAGACTCTATTTCTAAATGTATCAGTCTCCATCCCTTGTTCCCAAGAAAGGTAGTGATGGCAGACATCTCGGGAAGCAAGGTGGGGGTGGAAAAGTAGCA	1	+	chr13:12431437-12431556
ACTN2	BA_593036_003756	CCCAAGAAAGGTAGTGATGGCAGACATCTCGGGAAGCAAGGTGGGGGTGGAAAAGTAGCATCATCAGAGGGTTATAGCAACAGCAGGGACAGAGCTGCTACTGAGAATTTAAGAGAGAGT	1	+	chr13:12431497-12431616
ACTN2	BA_593036_003757	TCATCAGAGGGTTATAGCAACAGCAGGGACAGAGCTGCTACTGAGAATTTAAGAGAGAGTAGACAAGAAAAGAGAAATACTATATAAAAGTAGTGCGTGGTTATTTGATAATGAATGCAA	1	+	chr13:12431557-12431676
ACTN2	BA_593036_003758	AGACAAGAAAAGAGAAATACTATATAAAAGTAGTGCGTGGTTATTTGATAATGAATGCAAGCATGAAGCCTTTTTCTTTCTTGTTAACATCACCATAGATTTCCAACATTATACACTTAC	1	+	chr13:12431617-12431736
ACTN2	BA_593036_003759	GCATGAAGCCTTTTTCTTTCTTGTTAACATCACCATAGATTTCCAACATTATACACTTACTGACACACAATCACTCAAAGGAGCAGCTATGGAAACTCCCATGCACACTGACACTCACAC	1	+	chr13:12431677-12431796
ACTN2	BA_593036_003760	TGACACACAATCACTCAAAGGAGCAGCTATGGAAACTCCCATGCACACTGACACTCACACTTAGCATCCACCTAACAGTAGGCTCTTAGAAGGGAAATCCACCTTGCTCATGCCCAGAAA	1	+	chr13:12431737-12431856
ACTN2	BA_593036_003761	TTAGCATCCACCTAACAGTAGGCTCTTAGAAGGGAAATCCACCTTGCTCATGCCCAGAAAAAGTAAGAAGATAAGGCATGAGGCACTGGCTTGGGGAACTGGCTTTTGTCAGAATGTTGA	1	+	chr13:12431797-12431916
ACTN2	BA_593036_003762	AAGTAAGAAGATAAGGCATGAGGCACTGGCTTGGGGAACTGGCTTTTGTCAGAATGTTGAGTTAGTCTGTTGACTTGCCTAACCACCCAGGCTCTGTGCCCAGTCAAACAGAGGTGGAAC	1	+	chr13:12431857-12431976
ACTN2	BA_593036_003763	GTTAGTCTGTTGACTTGCCTAACCACCCAGGCTCTGTGCCCAGTCAAACAGAGGTGGAACTTAGCCTCCTGGTGAGCACCCCTATTTGTTTTAGCCAAGAGGATCAAGAAGAAACCCTGA	1	+	chr13:12431917-12432036
ACTN2	BA_593036_003764	TTAGCCTCCTGGTGAGCACCCCTATTTGTTTTAGCCAAGAGGATCAAGAAGAAACCCTGAATAATGGAATGTTCCATTAGGCCCCATAGAGCACCAAGATGGGGAGGGAGCTCTTGGAAG	1	+	chr13:12431977-12432096
ACTN2	BA_593036_003765	ATAATGGAATGTTCCATTAGGCCCCATAGAGCACCAAGATGGGGAGGGAGCTCTTGGAAGCTGGCTGTCTCCTTCATCCCTGTGTGCTTACCTCAATGAACTATAAATAGAGTGTGAAAT	1	+	chr13:12432037-12432156
ACTN2	BA_593036_003766	CTGGCTGTCTCCTTCATCCCTGTGTGCTTACCTCAATGAACTATAAATAGAGTGTGAAATAATTTTTACTTTGTAGGTGAATGTCTAGGGTTCTACAGCATCCCTCTCTAAGGAGCCTAA	1	+	chr13:12432097-12432216
ACTN2	BA_593036_003767	AATTTTTACTTTGTAGGTGAATGTCTAGGGTTCTACAGCATCCCTCTCTAAGGAGCCTAACATGTTTAATAAGTAGTTTTCGAATTATCTTTGGGCCAGACCTAGGAAAGTTGAGATAGA	1	+	chr13:12432157-12432276
ACTN2	BA_593036_003768	CATGTTTAATAAGTAGTTTTCGAATTATCTTTGGGCCAGACCTAGGAAAGTTGAGATAGAGTGGGTTTTCATTTTGTGTCTTAGTGAGGAGACAGTCTTGGGGCAAATGAAGACAGCAGG	1	+	chr13:12432217-12432336
ACTN2	BA_593036_003769	GTGGGTTTTCATTTTGTGTCTTAGTGAGGAGACAGTCTTGGGGCAAATGAAGACAGCAGGGTCTGTCACAAAATAACTTTAGGGCAAGGTCATGGCAAAAGGAGAGCTGAGACTCTCAGA	1	+	chr13:12432277-12432396
ACTN2	BA_593036_003770	GTCTGTCACAAAATAACTTTAGGGCAAGGTCATGGCAAAAGGAGAGCTGAGACTCTCAGATTCTAGTCTAACAGTCTTTTGAACATCATTCGTTTTCCAACTTATGTTAACTTTTATACA	1	+	chr13:12432337-12432456
ACTN2	BA_593036_003771	CACACACACACACCAGGTGTCCTGCCTATCTCTGGGTGTGCTGTCCTTTCTGATGGTGCGGTGGGAGGCTGGGGGAACAAGAGCCTCCACCAGGGGGCCTCTTCTAGTGGTCACAGCCGG	1	+	chr13:12432465-12432584
ACTN2	BA_593036_003772	GTGGGAGGCTGGGGGAACAAGAGCCTCCACCAGGGGGCCTCTTCTAGTGGTCACAGCCGGAGACGCCCCCACCCCACAACGACCCAGGCACAGACATGCGTGAGGGACCCTGCTGACCTT	2	+	chr13:12432525-12432644
ACTN2	BA_593036_003773	AGACGCCCCCACCCCACAACGACCCAGGCACAGACATGCGTGAGGGACCCTGCTGACCTTCCTCTGCTGCTTCTCCCAGGCCGGGTCGAGGAGCAGGTCGCGGTCCCACTCCTCCTCCTG	2	+	chr13:12432585-12432704
ACTN2	BA_593036_003774	CCTCTGCTGCTTCTCCCAGGCCGGGTCGAGGAGCAGGTCGCGGTCCCACTCCTCCTCCTGGATCATATACTCATCTTCGTCGTAGACATAGTTGTACTGCACGCCGGGCTCTATCTGATT	1	+	chr13:12432645-12432764
ACTN2	BA_593036_003775	GATCATATACTCATCTTCGTCGTAGACATAGTTGTACTGCACGCCGGGCTCTATCTGATTCATGGCGCTGGGTGGCTGGGGCGGCTGGGGAGCGAGCACAGCGCAAGGGATGGACAGACG	1	+	chr13:12432705-12432824
ACTN2	BA_593036_003776	TGGAAAGGCGGCGGGCTGCGGTGACCTTCTCGCGGTTCCTGGGGCGGCACGCCTGGGCGCGGAGTCTCCGGCGAAGTACCAGCACGCCTGCAGGCAGCGCCGCGCGGATTAATAGCCCGC	2	+	chr13:12432915-12433034
ACTN2	BA_593036_003777	GGAGTCTCCGGCGAAGTACCAGCACGCCTGCAGGCAGCGCCGCGCGGATTAATAGCCCGCTGAGAGTCACGTGCTGCCGGCCCCACCCACTCCCCGTCTCCAACACGTGTGGTTGGCTGG	2	+	chr13:12432975-12433094
ACTN2	BA_593036_003778	TGAGAGTCACGTGCTGCCGGCCCCACCCACTCCCCGTCTCCAACACGTGTGGTTGGCTGGCTGGAGAGCCCCGCTCAGGTTCCACTGCCTTGACTCCGCCCACCCCTGCTCTCTGCTGGC	2	+	chr13:12433035-12433154
ACTN2	BA_593036_003779	CTGGAGAGCCCCGCTCAGGTTCCACTGCCTTGACTCCGCCCACCCCTGCTCTCTGCTGGCTTCCAGGGATGACCTAGGGGCACCTCGGACAGCAACCCAGAGGAAAGTAGGGAGGGTTGG	1	+	chr13:12433095-12433214
ACTN2	BA_593036_003780	TTCCAGGGATGACCTAGGGGCACCTCGGACAGCAACCCAGAGGAAAGTAGGGAGGGTTGGAAGCTTAGAACTAGGGAGAGGACACATATGGATCCGGTCCCACCTCTCACAGCACACACA	1	+	chr13:12433155-12433274
ACTN2	BA_593036_003781	AAGCTTAGAACTAGGGAGAGGACACATATGGATCCGGTCCCACCTCTCACAGCACACACAAGGGTTCCAAAGACCCGCTGCAAAGTCATGTTTCCCGTGTGTCCACAAGCTAGCTGAAAA	1	+	chr13:12433215-12433334
ACVR1B	BA_593036_005133	AACACAGACGCTCGCTCGCACAGGTAGTTGTGTCCAGCTCGCTGCAGCGGGAGGGAGCCTCGAGGGGACGCCGGTCAGGAGACTCTGGCGACGAACCCAGCGGGACACAACGGGCCGGAG	2	+	chr15:101004076-101004195
ACVR1B	BA_593036_005134	CGAGGGGACGCCGGTCAGGAGACTCTGGCGACGAACCCAGCGGGACACAACGGGCCGGAGGGTCGGGGCTGGGGGAAGGAAGGAGGACGGGCGCCGGCGCGGCCACTCCGCGGAGGGAGG	2	+	chr15:101004136-101004255
ACVR1B	BA_593036_005135	GGTCGGGGCTGGGGGAAGGAAGGAGGACGGGCGCCGGCGCGGCCACTCCGCGGAGGGAGGAGGGAGACTGTCGGTCGGCGGACCCGGCCTCCCCCGCTTTCGGCTCAGCTCCGCACGGGT	2	+	chr15:101004196-101004315
ACVR1B	BA_593036_005136	AGGGAGACTGTCGGTCGGCGGACCCGGCCTCCCCCGCTTTCGGCTCAGCTCCGCACGGGTGCGCGAGGTTGGCCGAGGCGAGAGCCTCCGCCCCTTTAACAGGGACCCTCCCCTTTAAGG	2	+	chr15:101004256-101004375
ACVR1B	BA_593036_005137	GGGGCGCGCGCGCGCGCTGGGCGCTGCTGGGCTGCGGCGGCGGTTACTATGGCGGAGTCGGCCGGAGCCTCCTCCTTCTTCCCCCTTGTTGTCCTCCTGCTCGCCGGCAGCGGCGGGTCC	2	+	chr15:101004528-101004647
ACVR1B	BA_593036_005138	GCCGGAGCCTCCTCCTTCTTCCCCCTTGTTGTCCTCCTGCTCGCCGGCAGCGGCGGGTCCGGGCCCCGGGGGATCCAGGGTGAGTCCGGGGCGGGGATGGGGGGGGGGGGCGCGGGATAC	2	+	chr15:101004588-101004707
ACVR1B	BA_593036_005139	GGGCCCCGGGGGATCCAGGGTGAGTCCGGGGCGGGGATGGGGGGGGGGGGCGCGGGATACAGACGGCCAGGCGAGGCCTCGCGCTCGCCGTGGGGCTCGGGCGCGCCCCCTCCCCAGCCG	2	+	chr15:101004648-101004767
ACVR1B	BA_593036_005140	AGACGGCCAGGCGAGGCCTCGCGCTCGCCGTGGGGCTCGGGCGCGCCCCCTCCCCAGCCGCGCAATATGGCCGGGCGGGGGGCGCGGAGGGCCGGGGTGGCGCTGGGTCAGCCTTGGGGA	2	+	chr15:101004708-101004827
ACVR1B	BA_593036_005141	CGCAATATGGCCGGGCGGGGGGCGCGGAGGGCCGGGGTGGCGCTGGGTCAGCCTTGGGGACCCGCGCGCTCTTCCAGACGGAGCCCGACCGGGGCGCCCAGGGGGTCGCGCCTCCTGCAC	2	+	chr15:101004768-101004887
ACVR1B	BA_593036_005142	CCCGCGCGCTCTTCCAGACGGAGCCCGACCGGGGCGCCCAGGGGGTCGCGCCTCCTGCACCCTCCGCTCCCACCCCAGGCTTCCTCGAGATGTGGAGGTCCCTGGCTCCTGCCCTTCAGC	2	+	chr15:101004828-101004947
ACVR1B	BA_593036_005143	CCTCCGCTCCCACCCCAGGCTTCCTCGAGATGTGGAGGTCCCTGGCTCCTGCCCTTCAGCGCGTCCGTGCGAGGGGGGTTATTCCCTGCCAGCAGATGCTCCTGGGGGCGCCTTTTCTCC	2	+	chr15:101004888-101005007
ACVR1B	BA_593036_005144	GCGTCCGTGCGAGGGGGGTTATTCCCTGCCAGCAGATGCTCCTGGGGGCGCCTTTTCTCCCGCCAAGATTGTGGGGTTCGACGATGGGGGGCTTGTTTCTCCGATGTGTTCTGTTGCCGA	1	+	chr15:101004948-101005067
ACVR1B	BA_593036_005145	CGCCAAGATTGTGGGGTTCGACGATGGGGGGCTTGTTTCTCCGATGTGTTCTGTTGCCGAGAGCCTATGCGTACCCTAGGCTAGGAGGGTAGGGGTCTCTAAGCCTCCCTTCATCATGGG	1	+	chr15:101005008-101005127
ACVR1B	BA_593036_005146	GAGCCTATGCGTACCCTAGGCTAGGAGGGTAGGGGTCTCTAAGCCTCCCTTCATCATGGGGTGCCCCTACCCTCTTTCCCCTGCCACCCTGATGGTCTAGGCACCGGAGTCACATTCCCC	1	+	chr15:101005068-101005187
ACVR1B	BA_593036_005147	GTGCCCCTACCCTCTTTCCCCTGCCACCCTGATGGTCTAGGCACCGGAGTCACATTCCCCCTTCTTTCGCTCAGCTCCTTGGGTTCTGCAGGGCACCCCCCTCCCACCCACCTCGGATAT	1	+	chr15:101005128-101005247
ACVR1B	BA_593036_005148	CTTCTTTCGCTCAGCTCCTTGGGTTCTGCAGGGCACCCCCCTCCCACCCACCTCGGATATCCATGCCTGTAGACGCTGTTTGGAGGAAATGGGGCGAGCAGGCCCCTAAACCTTTTTGGA	1	+	chr15:101005188-101005307
ACVR1B	BA_593036_005149	CCATGCCTGTAGACGCTGTTTGGAGGAAATGGGGCGAGCAGGCCCCTAAACCTTTTTGGAGATTGGCCTCAGAGCCATTCCAACCCTGTGAAAACCTAGTTCCCCAGCTGTTAATCTGAA	1	+	chr15:101005248-101005367
ACVR1B	BA_593036_005150	GATTGGCCTCAGAGCCATTCCAACCCTGTGAAAACCTAGTTCCCCAGCTGTTAATCTGAATCTAGGTGTATGTGTGTTTGCATGCCTCCTCACCTCCCCCACCCCGCCCCAGGGGGCCCA	1	+	chr15:101005308-101005427
ACVR1B	BA_593036_005151	TCTAGGTGTATGTGTGTTTGCATGCCTCCTCACCTCCCCCACCCCGCCCCAGGGGGCCCATTCAGTTAATCACTCCGAGGATGCTTTTCAGGTGAGATCCTGAAAACTGCTTCCAACCCC	1	+	chr15:101005368-101005487
ACVR1B	BA_593036_005152	TTCAGTTAATCACTCCGAGGATGCTTTTCAGGTGAGATCCTGAAAACTGCTTCCAACCCCCCCACCCCCAATTATTTAAAGACCCCCACGGTTGGACCGTCTCCCTGGCCCTTGGTCAGT	1	+	chr15:101005428-101005547
ACVR1B	BA_593036_005153	CCCACCCCCAATTATTTAAAGACCCCCACGGTTGGACCGTCTCCCTGGCCCTTGGTCAGTACTTTTGCCTTGACACACAGTCCCTCCTCCCGGCACCCACCCTCCACACACACCCCTTAC	1	+	chr15:101005488-101005607
ACVR1B	BA_593036_005154	ACTTTTGCCTTGACACACAGTCCCTCCTCCCGGCACCCACCCTCCACACACACCCCTTACCTTCCAGCCTTAAGGGCCTTGTGTGGCCAGGCCCACCCCCACCTTTCCCAGTACAGAGGT	1	+	chr15:101005548-101005667
ACVR1B	BA_593036_005155	CTTCCAGCCTTAAGGGCCTTGTGTGGCCAGGCCCACCCCCACCTTTCCCAGTACAGAGGTGGAGACGTTTCTGTGGGACACTACACCGGCTGTGTTGTTTATGAGGCTTGTGAGGCTGGG	1	+	chr15:101005608-101005727
ACVR1B	BA_593036_005156	GGAGACGTTTCTGTGGGACACTACACCGGCTGTGTTGTTTATGAGGCTTGTGAGGCTGGGAAGAGCCGGTGAAACCCTAAAATATTTCATCTGGTAGTATTCTCAAATGTGCTTTGGCAT	1	+	chr15:101005668-101005787
ACVR1B	BA_593036_005157	AAGAGCCGGTGAAACCCTAAAATATTTCATCTGGTAGTATTCTCAAATGTGCTTTGGCATTGGGGTTACAGAAGAAGGTTATATTTGGCAGTTGCATCGAAGTGATTATTGACCCACAGA	1	+	chr15:101005728-101005847
ACVR1B	BA_593036_005158	TGGGGTTACAGAAGAAGGTTATATTTGGCAGTTGCATCGAAGTGATTATTGACCCACAGATGGATATGGTGAGACAATTAGGGGTTGTATTTGCTGCTCCCATTGTACAAAGCCTTCTGC	1	+	chr15:101005788-101005907
ACVR1B	BA_593036_005159	TGGATATGGTGAGACAATTAGGGGTTGTATTTGCTGCTCCCATTGTACAAAGCCTTCTGCTTTGGCTTCTCAGCCGCCCCCAACCTTCCAGCAATGGAAGTTCGTGTGTGTGTGTGTGTG	1	+	chr15:101005848-101005967
ACVR1B	BA_593036_005160	ACACACACACACGAGATGCTCAGGTGGGTCTTGGTTTAGTAACGCAGACCCTCAGTAGAAGACACCATGCTACTTTGGAGTCTCAAAACCAAGTTCACTATCCCCGTCTTTGATGTGTTC	1	+	chr15:101006060-101006179
ACVR1B	BA_593036_005161	GACACCATGCTACTTTGGAGTCTCAAAACCAAGTTCACTATCCCCGTCTTTGATGTGTTCTTCCAGAGTGGCGGGGCTTGTGCGTCGGCGGCGGGGTCTTTGTTCACTGGCTAGTGCTTC	1	+	chr15:101006120-101006239
ACVR1B	BA_593036_005162	TTCCAGAGTGGCGGGGCTTGTGCGTCGGCGGCGGGGTCTTTGTTCACTGGCTAGTGCTTCTGCTAGGCACTGTGCTGAGTTCCCTGTGTTGCTGCTGCTCTGTCACAGGTAACTGAGCGG	1	+	chr15:101006180-101006299
ACVR1B	BA_593036_005163	TGCTAGGCACTGTGCTGAGTTCCCTGTGTTGCTGCTGCTCTGTCACAGGTAACTGAGCGGCGGCGGCAGAGACTGGTAAACCCCGCCGAAGGTGGATGAACAGCCTTACATTTGTGGGGA	1	+	chr15:101006240-101006359
ACVR1B	BA_593036_005164	CGGCGGCAGAGACTGGTAAACCCCGCCGAAGGTGGATGAACAGCCTTACATTTGTGGGGAGAGAGTGATTTTCATAAATAAGAATGTTCTCTGGGGCTTGTGGGCCATGTTTCGAGATCT	1	+	chr15:101006300-101006419
ACVR1B	BA_593036_005165	GAGAGTGATTTTCATAAATAAGAATGTTCTCTGGGGCTTGTGGGCCATGTTTCGAGATCTGTGACAGTGCTGTTTCCCTAGTAGGGTGGTAAAAATAAGGACATTCCGTCTTCAGGTTTG	1	+	chr15:101006360-101006479
ACVR1B	BA_593036_005166	GTGACAGTGCTGTTTCCCTAGTAGGGTGGTAAAAATAAGGACATTCCGTCTTCAGGTTTGTCGTGTTATGTGTGTATAAATAAATCTCTAAGTCCCTCCAGTGAAATTCATATCCTGCCT	1	+	chr15:101006420-101006539
ACVR1B	BA_593036_005167	TCGTGTTATGTGTGTATAAATAAATCTCTAAGTCCCTCCAGTGAAATTCATATCCTGCCTCTAGCATCTCCAAGATTTTGAAACAGTCAGTTCCCTGCTGATTTGGTGTCTGTCTGTGGG	1	+	chr15:101006480-101006599
ACVR1B	BA_593036_005168	CTAGCATCTCCAAGATTTTGAAACAGTCAGTTCCCTGCTGATTTGGTGTCTGTCTGTGGGCTTGCCTTGTTGCTAGCATAGTTAAGAATGTTTAATTGGTAAGCCAACTGGTTCTGAACA	1	+	chr15:101006540-101006659
ACVR1B	BA_593036_005169	CTTGCCTTGTTGCTAGCATAGTTAAGAATGTTTAATTGGTAAGCCAACTGGTTCTGAACACGGTTTGTTTTTGTATCCTCCCCAAACTGGATGCTTGTTGGGGTGGCAGTGGGTGGGTAT	1	+	chr15:101006600-101006719
ACVR1B	BA_593036_005170	CGGTTTGTTTTTGTATCCTCCCCAAACTGGATGCTTGTTGGGGTGGCAGTGGGTGGGTATAACCGGGAGTTGGGCTCTTTTTTTGGTAAATGGGATATTTGGTTGTGTGTCCAGCAAACA	1	+	chr15:101006660-101006779
AES	BA_593036_000296	CGCCCCCCGCGACTGACATGATGTTTCCGCAAAGCCGGCACTCGGTAAGGGGAACCCCGCGCACTGCACCCCAGAGCTCTCCCTGCACCCCCAGCTCAGCTCACTGCACCTCCGGCGCTC	2	+	chr10:81022370-81022489
AES	BA_593036_000297	GCACTGCACCCCAGAGCTCTCCCTGCACCCCCAGCTCAGCTCACTGCACCTCCGGCGCTCACCCTGCACCCCAGCTCATCTCACTGCACCCCTTCTAGGTCGGATCCCGTCTCTCTCCCC	2	+	chr10:81022430-81022549
AES	BA_593036_000298	ACCCTGCACCCCAGCTCATCTCACTGCACCCCTTCTAGGTCGGATCCCGTCTCTCTCCCCGCCCAGGGCCTGTCCCAGGGGCTCCCTACGCTTCCCCAGCTCCCACAGGCCTGTTCTGTC	2	+	chr10:81022490-81022609
AES	BA_593036_000299	GCCCAGGGCCTGTCCCAGGGGCTCCCTACGCTTCCCCAGCTCCCACAGGCCTGTTCTGTCCCCCCAGCCCTGGGCTCTTCCCCAAGGTCCTTGCACCCCACAACCCAGACCCTACGCACC	2	+	chr10:81022550-81022669
AES	BA_593036_000300	CCCCCAGCCCTGGGCTCTTCCCCAAGGTCCTTGCACCCCACAACCCAGACCCTACGCACCCCACCAGTCCAGCACTGCATCCTTCAGCCCGGATCCCTGAACTTTGATCCCTGCCCTGAG	1	+	chr10:81022610-81022729
AES	BA_593036_000301	CCACCAGTCCAGCACTGCATCCTTCAGCCCGGATCCCTGAACTTTGATCCCTGCCCTGAGTCCCCTCACCGCCTCCCCCACACCTCGCCCAACCCGACTCCAAGGTCTTCTTCCACCCCC	1	+	chr10:81022670-81022789
AES	BA_593036_000302	CCCGGGCTCCGGATCAGCCCGCACCCCACTGCAGCCGCATTCGGCCTGTCTTCCTGACCTGGGGCTCAGGCCCAGAGCTGCAGCACCCCAGTCACAAGCCCATCATCCCCTCACCCCAGA	2	+	chr10:81022800-81022919
AES	BA_593036_000303	GGGGCTCAGGCCCAGAGCTGCAGCACCCCAGTCACAAGCCCATCATCCCCTCACCCCAGACGCGCATGTCCTCCAGCCCTAGATCTTGCATCCCCACCTCGGTGCACCCCCCCCCCCCCA	2	+	chr10:81022860-81022979
AES	BA_593036_000304	CGCGCATGTCCTCCAGCCCTAGATCTTGCATCCCCACCTCGGTGCACCCCCCCCCCCCCAGGCCCAGCTCTCTAAGAGCTTCAGACTGGCCTGCCACCAAGTCCAAGGCCCTGCACCCAC	2	+	chr10:81022920-81023039
AES	BA_593036_000305	GGCCCAGCTCTCTAAGAGCTTCAGACTGGCCTGCCACCAAGTCCAAGGCCCTGCACCCACCATCACCTCGGCCCTGCACTTCTTTCCACCTCAGATCTGCCCTGGCCCCAAGTCTGGTGC	1	+	chr10:81022980-81023099
AES	BA_593036_000306	CATCACCTCGGCCCTGCACTTCTTTCCACCTCAGATCTGCCCTGGCCCCAAGTCTGGTGCCCTCTACCCCCCAATACAGTTCCCGCACCCCCTGTCTCTCTCTCCAGCCCTGTCGGGCCT	1	+	chr10:81023040-81023159
AES	BA_593036_000307	CCTCTACCCCCCAATACAGTTCCCGCACCCCCTGTCTCTCTCTCCAGCCCTGTCGGGCCTGGCGTCACCATCCGGGCCCAGCGCCACCCCCAGCCTGGCTCCGCGTCCCTCCTCCAGCTG	2	+	chr10:81023100-81023219
AES	BA_593036_000308	GGCGTCACCATCCGGGCCCAGCGCCACCCCCAGCCTGGCTCCGCGTCCCTCCTCCAGCTGCAGGCCCCGCACCCCAGCGGCCTTCCTCCTCCCAGCCCCCATCCTGCACCCTCAGCACTA	2	+	chr10:81023160-81023279
AES	BA_593036_000309	CAGGCCCCGCACCCCAGCGGCCTTCCTCCTCCCAGCCCCCATCCTGCACCCTCAGCACTAGGGTTGGGGAGACCCTGTGCCCGTATAATGTCCAGTGCTCCCTTGTCCGGAGCCGGATAC	2	+	chr10:81023220-81023339
AES	BA_593036_000310	GGGTTGGGGAGACCCTGTGCCCGTATAATGTCCAGTGCTCCCTTGTCCGGAGCCGGATACCCCGCAGTCTTCCCACCCCCCGCCCCCCCAGCACTAGGCTCCGTCCCTCTCATGTCCAAG	2	+	chr10:81023280-81023399
AES	BA_593036_000311	CCCGCAGTCTTCCCACCCCCCGCCCCCCCAGCACTAGGCTCCGTCCCTCTCATGTCCAAGCCCATCTGTCGTCTCCCACACCAGCTCCCAGTGGCCTTGCTCCCCACACCCTGCCCCTAG	2	+	chr10:81023340-81023459
AES	BA_593036_000312	CCCATCTGTCGTCTCCCACACCAGCTCCCAGTGGCCTTGCTCCCCACACCCTGCCCCTAGCCTTGCTCCCCAGATCCGAGATCTTACACCCTAACTCCTGACCCAGTGCCCTCAGATGCC	1	+	chr10:81023400-81023519
AES	BA_593036_000313	CCTTGCTCCCCAGATCCGAGATCTTACACCCTAACTCCTGACCCAGTGCCCTCAGATGCCGGCCCTGTACATATCCCACCCCCCTCGCTCCCCAGCCCCCCAGCTTCCAGCTCTCCCTAA	1	+	chr10:81023460-81023579
AES	BA_593036_000314	GGCCCTGTACATATCCCACCCCCCTCGCTCCCCAGCCCCCCAGCTTCCAGCTCTCCCTAACTCCCAGGCCATGATTTCTCTGTGGCTTTGGCTGGGGCCTGGGCAGCTTTGGGGGGGTCC	2	+	chr10:81023520-81023639
AES	BA_593036_000315	CTCCCAGGCCATGATTTCTCTGTGGCTTTGGCTGGGGCCTGGGCAGCTTTGGGGGGGTCCCTTCCTGAAGAGCACACCCGTGAGGAAACAGGTGTGATGGGGGTACTCCCAGGAAATGTA	1	+	chr10:81023580-81023699
AES	BA_593036_000316	CTTCCTGAAGAGCACACCCGTGAGGAAACAGGTGTGATGGGGGTACTCCCAGGAAATGTAGGGTGGTAAGTTAGGTGCCTCTTCCATGCCGGCTTTGAAGGGAGGCCTGTGCCACCCTGA	1	+	chr10:81023640-81023759
AES	BA_593036_000317	GGGTGGTAAGTTAGGTGCCTCTTCCATGCCGGCTTTGAAGGGAGGCCTGTGCCACCCTGATTGACTTAGAGGGGCTTTCTGGGGAATTCCTCTGGGAGCATCTGGAGGACAGAGGTGCAC	1	+	chr10:81023700-81023819
AES	BA_593036_000318	TTGACTTAGAGGGGCTTTCTGGGGAATTCCTCTGGGAGCATCTGGAGGACAGAGGTGCACCCCGCCCCATGGGTGCCCGCCCCTCCCAAATGACCAGTGTGTAAAAGTGTCCCCACTGCC	1	+	chr10:81023760-81023879
AFF3	BA_678916_000000	AGTAATTAGCAACTTTTATAGAGTAATAACATGTTCCATATTCTCTCTACACTAGCTCTTTGAAGTTGCCAGTGTAATATATACAAGTTTTATTACATTGGAGCCCATCCTTGTGTGTTT	1	+	chr1:38682504-38682623
AFF3	BA_678916_000001	ATGTTCCATATTCTCTCTACACTAGCTCTTTGAAGTTGCCAGTGTAATATATACAAGTTTTATTACATTGGAGCCCATCCTTGTGTGTTTTATAGGTGCTAGCATTATGCAGAGCAAGCT	1	+	chr1:38682534-38682653
AFF3	BA_678916_000002	TGAAGTTGCCAGTGTAATATATACAAGTTTTATTACATTGGAGCCCATCCTTGTGTGTTTTATAGGTGCTAGCATTATGCAGAGCAAGCTGTAGTCACCGTCGGATCTTCTATAAGAAAC	1	+	chr1:38682564-38682683
AFF3	BA_678916_000003	TATTACATTGGAGCCCATCCTTGTGTGTTTTATAGGTGCTAGCATTATGCAGAGCAAGCTGTAGTCACCGTCGGATCTTCTATAAGAAACTGCCCGATAATTCGTGAGCTCTGTGTCTAG	1	+	chr1:38682594-38682713
AFF3	BA_678916_000004	TATAGGTGCTAGCATTATGCAGAGCAAGCTGTAGTCACCGTCGGATCTTCTATAAGAAACTGCCCGATAATTCGTGAGCTCTGTGTCTAGTTTATTTTGTTACACCTGTCTTTAAGAAAA	1	+	chr1:38682624-38682743
AFF3	BA_678916_000005	GTAGTCACCGTCGGATCTTCTATAAGAAACTGCCCGATAATTCGTGAGCTCTGTGTCTAGTTTATTTTGTTACACCTGTCTTTAAGAAAATAAAGTCACTTTGAGCCTAAGTCACTATGG	1	+	chr1:38682654-38682773
AFF3	BA_678916_000006	TGCCCGATAATTCGTGAGCTCTGTGTCTAGTTTATTTTGTTACACCTGTCTTTAAGAAAATAAAGTCACTTTGAGCCTAAGTCACTATGGAGATTCACATGCCCACATGCCATCGAGGTA	1	+	chr1:38682684-38682803
AFF3	BA_678916_000007	TTTATTTTGTTACACCTGTCTTTAAGAAAATAAAGTCACTTTGAGCCTAAGTCACTATGGAGATTCACATGCCCACATGCCATCGAGGTATGTGTCATAAATCATAAAGCAGTTTAGCTT	1	+	chr1:38682714-38682833
AFF3	BA_678916_000008	TAAAGTCACTTTGAGCCTAAGTCACTATGGAGATTCACATGCCCACATGCCATCGAGGTATGTGTCATAAATCATAAAGCAGTTTAGCTTTAAAATTGTGCATCGCATATTCATGTGCAC	1	+	chr1:38682744-38682863
AFF3	BA_678916_000009	AGATTCACATGCCCACATGCCATCGAGGTATGTGTCATAAATCATAAAGCAGTTTAGCTTTAAAATTGTGCATCGCATATTCATGTGCACACCACTTGCAGTTTTTGACACATGTGAACT	1	+	chr1:38682774-38682893
AFF3	BA_678916_000010	TGTGTCATAAATCATAAAGCAGTTTAGCTTTAAAATTGTGCATCGCATATTCATGTGCACACCACTTGCAGTTTTTGACACATGTGAACTCTTTACTGAATTAAAAAGGGAACTGCTCAG	1	+	chr1:38682804-38682923
AFF3	BA_678916_000011	TAAAATTGTGCATCGCATATTCATGTGCACACCACTTGCAGTTTTTGACACATGTGAACTCTTTACTGAATTAAAAAGGGAACTGCTCAGCTCTACAATCAGCGATTACCAGAGGCAGAA	1	+	chr1:38682834-38682953
AFF3	BA_678916_000012	ACCACTTGCAGTTTTTGACACATGTGAACTCTTTACTGAATTAAAAAGGGAACTGCTCAGCTCTACAATCAGCGATTACCAGAGGCAGAACAGAAAGCAGTTAATATGCTTGTTCCAGCA	1	+	chr1:38682864-38682983
AFF3	BA_678916_000013	CTTTACTGAATTAAAAAGGGAACTGCTCAGCTCTACAATCAGCGATTACCAGAGGCAGAACAGAAAGCAGTTAATATGCTTGTTCCAGCAGATGTTCATCCCCGTAAATATTAAACATAA	1	+	chr1:38682894-38683013
AFF3	BA_678916_000014	CTCTACAATCAGCGATTACCAGAGGCAGAACAGAAAGCAGTTAATATGCTTGTTCCAGCAGATGTTCATCCCCGTAAATATTAAACATAACACAAGTTCCTCCAGGAATATACAAGCAGT	1	+	chr1:38682924-38683043
AFF3	BA_678916_000015	CAGAAAGCAGTTAATATGCTTGTTCCAGCAGATGTTCATCCCCGTAAATATTAAACATAACACAAGTTCCTCCAGGAATATACAAGCAGTAATTTTACCACCTGAATAGGGCTGGTTGGA	1	+	chr1:38682954-38683073
AFF3	BA_678916_000016	GATGTTCATCCCCGTAAATATTAAACATAACACAAGTTCCTCCAGGAATATACAAGCAGTAATTTTACCACCTGAATAGGGCTGGTTGGAAACATTTAAGGGGTGGGGGCAATGTGAGGG	1	+	chr1:38682984-38683103
AFF3	BA_678916_000017	CACAAGTTCCTCCAGGAATATACAAGCAGTAATTTTACCACCTGAATAGGGCTGGTTGGAAACATTTAAGGGGTGGGGGCAATGTGAGGGATGCTGAAGCAGCCAATGGGATTTTTCAGA	1	+	chr1:38683014-38683133
AFF3	BA_678916_000018	AATTTTACCACCTGAATAGGGCTGGTTGGAAACATTTAAGGGGTGGGGGCAATGTGAGGGATGCTGAAGCAGCCAATGGGATTTTTCAGACAACCGCAACTAGAATTAAATTGCATCTAC	1	+	chr1:38683044-38683163
AFF3	BA_678916_000019	AACATTTAAGGGGTGGGGGCAATGTGAGGGATGCTGAAGCAGCCAATGGGATTTTTCAGACAACCGCAACTAGAATTAAATTGCATCTACCTGTGATTTACCTATAGCAGCTCTCCCTAA	1	+	chr1:38683074-38683193
AFF3	BA_678916_000020	ATGCTGAAGCAGCCAATGGGATTTTTCAGACAACCGCAACTAGAATTAAATTGCATCTACCTGTGATTTACCTATAGCAGCTCTCCCTAATGCGAGATTAGCGAGAACTGGAACCCCAAG	1	+	chr1:38683104-38683223
AFF3	BA_678916_000021	CAACCGCAACTAGAATTAAATTGCATCTACCTGTGATTTACCTATAGCAGCTCTCCCTAATGCGAGATTAGCGAGAACTGGAACCCCAAGTGCATTCCAGGCTGCCAGCTTTGAGCTTGA	1	+	chr1:38683134-38683253
AFF3	BA_678916_000022	CTGTGATTTACCTATAGCAGCTCTCCCTAATGCGAGATTAGCGAGAACTGGAACCCCAAGTGCATTCCAGGCTGCCAGCTTTGAGCTTGACAAAAAGAGTGAGGAGTTCAGCCATGGGCA	1	+	chr1:38683164-38683283
AFF3	BA_678916_000023	TGCGAGATTAGCGAGAACTGGAACCCCAAGTGCATTCCAGGCTGCCAGCTTTGAGCTTGACAAAAAGAGTGAGGAGTTCAGCCATGGGCATGTGTGAAGAAAGGGTGCAAAGGAACCGAG	1	+	chr1:38683194-38683313
AFF3	BA_678916_000024	TGCATTCCAGGCTGCCAGCTTTGAGCTTGACAAAAAGAGTGAGGAGTTCAGCCATGGGCATGTGTGAAGAAAGGGTGCAAAGGAACCGAGAACCTCCGGGAAATGAGTCTCCCTGGGCCA	1	+	chr1:38683224-38683343
AFF3	BA_678916_000025	CAAAAAGAGTGAGGAGTTCAGCCATGGGCATGTGTGAAGAAAGGGTGCAAAGGAACCGAGAACCTCCGGGAAATGAGTCTCCCTGGGCCAAGGCCTCCGGAATTCGGGCACCAAGACACA	1	+	chr1:38683254-38683373
AFF3	BA_678916_000026	TGTGTGAAGAAAGGGTGCAAAGGAACCGAGAACCTCCGGGAAATGAGTCTCCCTGGGCCAAGGCCTCCGGAATTCGGGCACCAAGACACACTGGCCTCCTGCCTAGGGTGCTCACTTTTC	1	+	chr1:38683284-38683403
AFF3	BA_678916_000027	AACCTCCGGGAAATGAGTCTCCCTGGGCCAAGGCCTCCGGAATTCGGGCACCAAGACACACTGGCCTCCTGCCTAGGGTGCTCACTTTTCCATCTCCAGTGGGAGTGAGGTAGGACAGAG	1	+	chr1:38683314-38683433
AFF3	BA_678916_000028	AGGCCTCCGGAATTCGGGCACCAAGACACACTGGCCTCCTGCCTAGGGTGCTCACTTTTCCATCTCCAGTGGGAGTGAGGTAGGACAGAGGAAGGATGCAAACGCCAAGCAGGGAGCAGG	1	+	chr1:38683344-38683463
AFF3	BA_678916_000029	CTGGCCTCCTGCCTAGGGTGCTCACTTTTCCATCTCCAGTGGGAGTGAGGTAGGACAGAGGAAGGATGCAAACGCCAAGCAGGGAGCAGGCAGGGCGCAAGGCTAGAGAGCATCCTCTCC	1	+	chr1:38683374-38683493
AFF3	BA_678916_000030	CATCTCCAGTGGGAGTGAGGTAGGACAGAGGAAGGATGCAAACGCCAAGCAGGGAGCAGGCAGGGCGCAAGGCTAGAGAGCATCCTCTCCGGGCACTTCGTAGAGGTACCAACTCTAGGG	1	+	chr1:38683404-38683523
AFF3	BA_678916_000031	GAAGGATGCAAACGCCAAGCAGGGAGCAGGCAGGGCGCAAGGCTAGAGAGCATCCTCTCCGGGCACTTCGTAGAGGTACCAACTCTAGGGGGTCACAGGGGTGGTGAGCCTGAGGCTCTC	1	+	chr1:38683434-38683553
AFF3	BA_678916_000032	CAGGGCGCAAGGCTAGAGAGCATCCTCTCCGGGCACTTCGTAGAGGTACCAACTCTAGGGGGTCACAGGGGTGGTGAGCCTGAGGCTCTCCGGGAGCTGGAGGGGAGCACAATCCGAAGG	1	+	chr1:38683464-38683583
AFF3	BA_678916_000033	GGGCACTTCGTAGAGGTACCAACTCTAGGGGGTCACAGGGGTGGTGAGCCTGAGGCTCTCCGGGAGCTGGAGGGGAGCACAATCCGAAGGAAGGGAGCTGAGAGGGGCTGCGAGATGAGG	1	+	chr1:38683494-38683613
AFF3	BA_678916_000034	GGTCACAGGGGTGGTGAGCCTGAGGCTCTCCGGGAGCTGGAGGGGAGCACAATCCGAAGGAAGGGAGCTGAGAGGGGCTGCGAGATGAGGGGTGGGCTCTCAGGCATCAGTGACACGTTC	1	+	chr1:38683524-38683643
AFF3	BA_678916_000035	CGGGAGCTGGAGGGGAGCACAATCCGAAGGAAGGGAGCTGAGAGGGGCTGCGAGATGAGGGGTGGGCTCTCAGGCATCAGTGACACGTTCTAAAAATCGGTTCTCTTCCCCTCCACCGCT	1	+	chr1:38683554-38683673
AFF3	BA_678916_000036	AAGGGAGCTGAGAGGGGCTGCGAGATGAGGGGTGGGCTCTCAGGCATCAGTGACACGTTCTAAAAATCGGTTCTCTTCCCCTCCACCGCTGCGCTCCTCCAGTGGCAGCCAGACCCCGGC	1	+	chr1:38683584-38683703
AFF3	BA_678916_000037	GGTGGGCTCTCAGGCATCAGTGACACGTTCTAAAAATCGGTTCTCTTCCCCTCCACCGCTGCGCTCCTCCAGTGGCAGCCAGACCCCGGCCCCCTGAGCTAGCGCAGGCAAGCACCGAGG	1	+	chr1:38683614-38683733
AFF3	BA_678916_000038	TAAAAATCGGTTCTCTTCCCCTCCACCGCTGCGCTCCTCCAGTGGCAGCCAGACCCCGGCCCCCTGAGCTAGCGCAGGCAAGCACCGAGGGGAGAGAACGGAACCGGAGACCGACGAATT	1	+	chr1:38683644-38683763
AFF3	BA_678916_000039	GCGCTCCTCCAGTGGCAGCCAGACCCCGGCCCCCTGAGCTAGCGCAGGCAAGCACCGAGGGGAGAGAACGGAACCGGAGACCGACGAATTCACGGGGAGGCGGCCGAGCATCCAGCCCGC	2	+	chr1:38683674-38683793
AFF3	BA_678916_000040	CCCCTGAGCTAGCGCAGGCAAGCACCGAGGGGAGAGAACGGAACCGGAGACCGACGAATTCACGGGGAGGCGGCCGAGCATCCAGCCCGCCAAGGCTGGAAGGAGCCGGCCAGCGAGGCG	2	+	chr1:38683704-38683823
AFF3	BA_678916_000041	GGAGAGAACGGAACCGGAGACCGACGAATTCACGGGGAGGCGGCCGAGCATCCAGCCCGCCAAGGCTGGAAGGAGCCGGCCAGCGAGGCGGGTGTCCCCGAGCCACCCCACCCCCACGGC	2	+	chr1:38683734-38683853
AFF3	BA_678916_000042	CACGGGGAGGCGGCCGAGCATCCAGCCCGCCAAGGCTGGAAGGAGCCGGCCAGCGAGGCGGGTGTCCCCGAGCCACCCCACCCCCACGGCGGCCGGGCACCCGGAGTCCCGGCCCAGGTG	2	+	chr1:38683764-38683883
AFF3	BA_678916_000043	CAAGGCTGGAAGGAGCCGGCCAGCGAGGCGGGTGTCCCCGAGCCACCCCACCCCCACGGCGGCCGGGCACCCGGAGTCCCGGCCCAGGTGAGGGCAGGCGGGGCCAGCGCGGCTCCCCAG	2	+	chr1:38683794-38683913
AFF3	BA_678916_000044	GGTGTCCCCGAGCCACCCCACCCCCACGGCGGCCGGGCACCCGGAGTCCCGGCCCAGGTGAGGGCAGGCGGGGCCAGCGCGGCTCCCCAGCGGCCAGCACCGGGACTCACCACAGCGACT	2	+	chr1:38683824-38683943
AFF3	BA_678916_000045	GGCCGGGCACCCGGAGTCCCGGCCCAGGTGAGGGCAGGCGGGGCCAGCGCGGCTCCCCAGCGGCCAGCACCGGGACTCACCACAGCGACTCGAGGTCCCATTCCTGGAGCAGGGCTAAGT	2	+	chr1:38683854-38683973
AFF3	BA_678916_000046	AGGGCAGGCGGGGCCAGCGCGGCTCCCCAGCGGCCAGCACCGGGACTCACCACAGCGACTCGAGGTCCCATTCCTGGAGCAGGGCTAAGTCGAAGCTGTCCATGGTGGGAGGTGTCAGCG	2	+	chr1:38683884-38684003
AFF3	BA_678916_000047	CCTGCGCTCCCCGCGCTCCCCGCTCTCCCCGTGCGGCTGCTCGGGGTCCCGCGCCCTTTCTCGGGCCGGACTGCCGGCTCGCCCTCCTCACCCGCGCCCCTCCATCTCTCCAGACCCTCA	2	+	chr1:38684502-38684621
AFF3	BA_678916_000048	GTGCGGCTGCTCGGGGTCCCGCGCCCTTTCTCGGGCCGGACTGCCGGCTCGCCCTCCTCACCCGCGCCCCTCCATCTCTCCAGACCCTCAGTGGCCCCGAGGGTTGCGGGGGACGTCCTC	2	+	chr1:38684532-38684651
AFF3	BA_678916_000049	TCGGGCCGGACTGCCGGCTCGCCCTCCTCACCCGCGCCCCTCCATCTCTCCAGACCCTCAGTGGCCCCGAGGGTTGCGGGGGACGTCCTCTGAGCCAAAGGGAGCGGCGCAGCGGCGCCG	2	+	chr1:38684562-38684681
AFF3	BA_678916_000050	CCCGCGCCCCTCCATCTCTCCAGACCCTCAGTGGCCCCGAGGGTTGCGGGGGACGTCCTCTGAGCCAAAGGGAGCGGCGCAGCGGCGCCGAGGGCAGGGGGATGCCGTGCCGAGCCGAGG	2	+	chr1:38684592-38684711
AFF3	BA_678916_000051	GTGGCCCCGAGGGTTGCGGGGGACGTCCTCTGAGCCAAAGGGAGCGGCGCAGCGGCGCCGAGGGCAGGGGGATGCCGTGCCGAGCCGAGGCCGGCCTGCAGCAAAGCAGACCCCTGCCTC	2	+	chr1:38684622-38684741
AFF3	BA_678916_000052	TGAGCCAAAGGGAGCGGCGCAGCGGCGCCGAGGGCAGGGGGATGCCGTGCCGAGCCGAGGCCGGCCTGCAGCAAAGCAGACCCCTGCCTCTCGCCCTCGCCCCGTGTCCAGCTGGGACTT	2	+	chr1:38684652-38684771
AFF3	BA_678916_000053	AGGGCAGGGGGATGCCGTGCCGAGCCGAGGCCGGCCTGCAGCAAAGCAGACCCCTGCCTCTCGCCCTCGCCCCGTGTCCAGCTGGGACTTTCTGGTCCTCCGCAAATTAAGGGGAACCCG	2	+	chr1:38684682-38684801
AFF3	BA_678916_000054	CCGGCCTGCAGCAAAGCAGACCCCTGCCTCTCGCCCTCGCCCCGTGTCCAGCTGGGACTTTCTGGTCCTCCGCAAATTAAGGGGAACCCGCAGGGCGCTGCGGCTGGAGGTGTGCACTCT	2	+	chr1:38684712-38684831
AFF3	BA_678916_000055	TCGCCCTCGCCCCGTGTCCAGCTGGGACTTTCTGGTCCTCCGCAAATTAAGGGGAACCCGCAGGGCGCTGCGGCTGGAGGTGTGCACTCTTGAAGATCTGGGGTGGGCGCTAGGAAGGAA	1	+	chr1:38684742-38684861
AFF3	BA_678916_000056	TCTGGTCCTCCGCAAATTAAGGGGAACCCGCAGGGCGCTGCGGCTGGAGGTGTGCACTCTTGAAGATCTGGGGTGGGCGCTAGGAAGGAAAAGCCCTGGGCGCCCCAGGCGCGGTGAGAG	2	+	chr1:38684772-38684891
AFF3	BA_678916_000057	CAGGGCGCTGCGGCTGGAGGTGTGCACTCTTGAAGATCTGGGGTGGGCGCTAGGAAGGAAAAGCCCTGGGCGCCCCAGGCGCGGTGAGAGTTAACAGTGCAGCCCACGGCAGCGCTGAAA	2	+	chr1:38684802-38684921
AFF3	BA_678916_000058	TGAAGATCTGGGGTGGGCGCTAGGAAGGAAAAGCCCTGGGCGCCCCAGGCGCGGTGAGAGTTAACAGTGCAGCCCACGGCAGCGCTGAAAACAAATCGTTTCAAATATCTGGAGCCAGTA	1	+	chr1:38684832-38684951
AFF3	BA_678916_000059	AAGCCCTGGGCGCCCCAGGCGCGGTGAGAGTTAACAGTGCAGCCCACGGCAGCGCTGAAAACAAATCGTTTCAAATATCTGGAGCCAGTAACTTAAGTGAAATAAAGAGGAGGCGGGAAG	1	+	chr1:38684862-38684981
AFF3	BA_678916_000060	TTAACAGTGCAGCCCACGGCAGCGCTGAAAACAAATCGTTTCAAATATCTGGAGCCAGTAACTTAAGTGAAATAAAGAGGAGGCGGGAAGGAAGCGTCTTCCAAGACCTGCTTTCAGCTG	1	+	chr1:38684892-38685011
AFF3	BA_678916_000061	ACAAATCGTTTCAAATATCTGGAGCCAGTAACTTAAGTGAAATAAAGAGGAGGCGGGAAGGAAGCGTCTTCCAAGACCTGCTTTCAGCTGCAGTTTAGCCTGGGGGCTGGGAGGACGAGG	1	+	chr1:38684922-38685041
AFF3	BA_678916_000062	ACTTAAGTGAAATAAAGAGGAGGCGGGAAGGAAGCGTCTTCCAAGACCTGCTTTCAGCTGCAGTTTAGCCTGGGGGCTGGGAGGACGAGGGGTATCCCACTAGCCCTCAGCTGCCCAGTC	1	+	chr1:38684952-38685071
AFF3	BA_678916_000063	GAAGCGTCTTCCAAGACCTGCTTTCAGCTGCAGTTTAGCCTGGGGGCTGGGAGGACGAGGGGTATCCCACTAGCCCTCAGCTGCCCAGTCCCTGGAAACCAGTCTCCTTTCTTTTTATTT	1	+	chr1:38684982-38685101
AFF3	BA_678916_000064	CAGTTTAGCCTGGGGGCTGGGAGGACGAGGGGTATCCCACTAGCCCTCAGCTGCCCAGTCCCTGGAAACCAGTCTCCTTTCTTTTTATTTCATACTGGAAAGGCCTCTCTGGGTTTCCAC	1	+	chr1:38685012-38685131
AFF3	BA_678916_000065	GGTATCCCACTAGCCCTCAGCTGCCCAGTCCCTGGAAACCAGTCTCCTTTCTTTTTATTTCATACTGGAAAGGCCTCTCTGGGTTTCCACTACAAACTTCCCGCCGCCTCCTCTCCTGTC	1	+	chr1:38685042-38685161
AFF3	BA_678916_000066	CCTGGAAACCAGTCTCCTTTCTTTTTATTTCATACTGGAAAGGCCTCTCTGGGTTTCCACTACAAACTTCCCGCCGCCTCCTCTCCTGTCTAGAGAGTGGCAGATTGTCAGCTGGAAAGA	1	+	chr1:38685072-38685191
AFF3	BA_678916_000067	CATACTGGAAAGGCCTCTCTGGGTTTCCACTACAAACTTCCCGCCGCCTCCTCTCCTGTCTAGAGAGTGGCAGATTGTCAGCTGGAAAGATGATAGAGTACCACTGTGGCTTGTAAAAAA	1	+	chr1:38685102-38685221
AFF3	BA_678916_000068	TACAAACTTCCCGCCGCCTCCTCTCCTGTCTAGAGAGTGGCAGATTGTCAGCTGGAAAGATGATAGAGTACCACTGTGGCTTGTAAAAAAAATAAAACCCTTGCTATTATTACTCCCTTG	1	+	chr1:38685132-38685251
AFF3	BA_678916_000069	TAGAGAGTGGCAGATTGTCAGCTGGAAAGATGATAGAGTACCACTGTGGCTTGTAAAAAAAATAAAACCCTTGCTATTATTACTCCCTTGGTTTGAGAGACTGCTCCCCCCTCGCTCATT	1	+	chr1:38685162-38685281
AFF3	BA_678916_000070	TGATAGAGTACCACTGTGGCTTGTAAAAAAAATAAAACCCTTGCTATTATTACTCCCTTGGTTTGAGAGACTGCTCCCCCCTCGCTCATTATTATATACACTCTGAGAGTGGGGACTGGA	1	+	chr1:38685192-38685311
AFF3	BA_678916_000071	AATAAAACCCTTGCTATTATTACTCCCTTGGTTTGAGAGACTGCTCCCCCCTCGCTCATTATTATATACACTCTGAGAGTGGGGACTGGAGGCGTAGAGCTGGTCTATCCTTCCATCTCT	1	+	chr1:38685222-38685341
AFF3	BA_678916_000072	GTTTGAGAGACTGCTCCCCCCTCGCTCATTATTATATACACTCTGAGAGTGGGGACTGGAGGCGTAGAGCTGGTCTATCCTTCCATCTCTGGGCTTCTGCCCTCAAAATTGAGGATCCCA	1	+	chr1:38685252-38685371
AFF3	BA_678916_000073	ATTATATACACTCTGAGAGTGGGGACTGGAGGCGTAGAGCTGGTCTATCCTTCCATCTCTGGGCTTCTGCCCTCAAAATTGAGGATCCCATGCTGGCCCCGGGGGTGGTGCATGGGGTTC	1	+	chr1:38685282-38685401
AFF3	BA_678916_000074	GGCGTAGAGCTGGTCTATCCTTCCATCTCTGGGCTTCTGCCCTCAAAATTGAGGATCCCATGCTGGCCCCGGGGGTGGTGCATGGGGTTCCCCTCTCCCATGCTCTTGGCCCCAGTTCCT	1	+	chr1:38685312-38685431
AFF3	BA_678916_000075	GGGCTTCTGCCCTCAAAATTGAGGATCCCATGCTGGCCCCGGGGGTGGTGCATGGGGTTCCCCTCTCCCATGCTCTTGGCCCCAGTTCCTGGAGCCCTGTTCAGGATTCCCCAGGATTCC	1	+	chr1:38685342-38685461
AFF3	BA_678916_000076	TGCTGGCCCCGGGGGTGGTGCATGGGGTTCCCCTCTCCCATGCTCTTGGCCCCAGTTCCTGGAGCCCTGTTCAGGATTCCCCAGGATTCCTGGAGAGAGCAGCACCGAGCAAAGCTCACC	1	+	chr1:38685372-38685491
AFF3	BA_678916_000077	CCCTCTCCCATGCTCTTGGCCCCAGTTCCTGGAGCCCTGTTCAGGATTCCCCAGGATTCCTGGAGAGAGCAGCACCGAGCAAAGCTCACCACTTACACCAAACCCCGCATGCCCTAAGGG	1	+	chr1:38685402-38685521
AFF3	BA_678916_000078	GGAGCCCTGTTCAGGATTCCCCAGGATTCCTGGAGAGAGCAGCACCGAGCAAAGCTCACCACTTACACCAAACCCCGCATGCCCTAAGGGAGGCCTTTGCAGTGTATCGGCCTTTGTTCC	1	+	chr1:38685432-38685551
AFF3	BA_678916_000079	TGGAGAGAGCAGCACCGAGCAAAGCTCACCACTTACACCAAACCCCGCATGCCCTAAGGGAGGCCTTTGCAGTGTATCGGCCTTTGTTCCTTTTCTAGACAAGAAGAGCCACCATGTGAG	1	+	chr1:38685462-38685581
AFF3	BA_678916_000080	ACTTACACCAAACCCCGCATGCCCTAAGGGAGGCCTTTGCAGTGTATCGGCCTTTGTTCCTTTTCTAGACAAGAAGAGCCACCATGTGAGGCCGCCAAAAATTTAGCCCCTTTGGTAGAA	1	+	chr1:38685492-38685611
AFF3	BA_678916_000081	AGGCCTTTGCAGTGTATCGGCCTTTGTTCCTTTTCTAGACAAGAAGAGCCACCATGTGAGGCCGCCAAAAATTTAGCCCCTTTGGTAGAAATCCTAGGAGCAACCCCTTTTTTTATTTCA	1	+	chr1:38685522-38685641
AFF3	BA_678916_000082	TTTTCTAGACAAGAAGAGCCACCATGTGAGGCCGCCAAAAATTTAGCCCCTTTGGTAGAAATCCTAGGAGCAACCCCTTTTTTTATTTCACCCACCTCTGAAGGAGAACTAACGAAGTCG	1	+	chr1:38685552-38685671
AFF3	BA_678916_000083	GCCGCCAAAAATTTAGCCCCTTTGGTAGAAATCCTAGGAGCAACCCCTTTTTTTATTTCACCCACCTCTGAAGGAGAACTAACGAAGTCGTGGGCGCAGGTAGATAAACTGCCAAAAAGC	1	+	chr1:38685582-38685701
AFF3	BA_678916_000084	ATCCTAGGAGCAACCCCTTTTTTTATTTCACCCACCTCTGAAGGAGAACTAACGAAGTCGTGGGCGCAGGTAGATAAACTGCCAAAAAGCCAACTAGAGTTCTATGCTCTCGGAAACAGA	1	+	chr1:38685612-38685731
AFF3	BA_678916_000085	CCCACCTCTGAAGGAGAACTAACGAAGTCGTGGGCGCAGGTAGATAAACTGCCAAAAAGCCAACTAGAGTTCTATGCTCTCGGAAACAGAACTGCAAAGCTCTCGGGCCCCCATCCTTTT	1	+	chr1:38685642-38685761
AFF3	BA_678916_000086	TGGGCGCAGGTAGATAAACTGCCAAAAAGCCAACTAGAGTTCTATGCTCTCGGAAACAGAACTGCAAAGCTCTCGGGCCCCCATCCTTTTCTTCCCCCAGCTTTGGAATAGTTCCCTATT	1	+	chr1:38685672-38685791
AFF3	BA_678916_000087	CAACTAGAGTTCTATGCTCTCGGAAACAGAACTGCAAAGCTCTCGGGCCCCCATCCTTTTCTTCCCCCAGCTTTGGAATAGTTCCCTATTAGCATCCATAACTAATGTGAAAATATCAAT	1	+	chr1:38685702-38685821
AFF3	BA_678916_000088	ACTGCAAAGCTCTCGGGCCCCCATCCTTTTCTTCCCCCAGCTTTGGAATAGTTCCCTATTAGCATCCATAACTAATGTGAAAATATCAATCGCTAAGTGAAGGCAGAGTCTGCATCAAAT	1	+	chr1:38685732-38685851
AFF3	BA_678916_000089	CTTCCCCCAGCTTTGGAATAGTTCCCTATTAGCATCCATAACTAATGTGAAAATATCAATCGCTAAGTGAAGGCAGAGTCTGCATCAAATCCGCTGTAGAAACTGACTGGTTATTTTTAC	1	+	chr1:38685762-38685881
AFF3	BA_678916_000090	AGCATCCATAACTAATGTGAAAATATCAATCGCTAAGTGAAGGCAGAGTCTGCATCAAATCCGCTGTAGAAACTGACTGGTTATTTTTACAAACTAACAACTTCGCTGCTTGAAACACCA	1	+	chr1:38685792-38685911
AFF3	BA_678916_000091	CGCTAAGTGAAGGCAGAGTCTGCATCAAATCCGCTGTAGAAACTGACTGGTTATTTTTACAAACTAACAACTTCGCTGCTTGAAACACCACCCCGGCCCCTTTAGTTGAAGGCTACAAAA	1	+	chr1:38685822-38685941
AFF3	BA_678916_000092	CCGCTGTAGAAACTGACTGGTTATTTTTACAAACTAACAACTTCGCTGCTTGAAACACCACCCCGGCCCCTTTAGTTGAAGGCTACAAAAGAACAAAGGAAATATGGACAAAGTACAGGT	1	+	chr1:38685852-38685971
AFF3	BA_678916_000093	AAACTAACAACTTCGCTGCTTGAAACACCACCCCGGCCCCTTTAGTTGAAGGCTACAAAAGAACAAAGGAAATATGGACAAAGTACAGGTGTGAAGGGCTGGGATCCAAAATCTTGGTCT	1	+	chr1:38685882-38686001
AFF3	BA_678916_000094	CCCCGGCCCCTTTAGTTGAAGGCTACAAAAGAACAAAGGAAATATGGACAAAGTACAGGTGTGAAGGGCTGGGATCCAAAATCTTGGTCTACAGTGTATCTGGAGAGAAGGAGGGGGGAA	1	+	chr1:38685912-38686031
AFF3	BA_678916_000095	GAACAAAGGAAATATGGACAAAGTACAGGTGTGAAGGGCTGGGATCCAAAATCTTGGTCTACAGTGTATCTGGAGAGAAGGAGGGGGGAAATGTGCCTTACAGATACCTACTTAGCATAA	1	+	chr1:38685942-38686061
AFF3	BA_678916_000096	GTGAAGGGCTGGGATCCAAAATCTTGGTCTACAGTGTATCTGGAGAGAAGGAGGGGGGAAATGTGCCTTACAGATACCTACTTAGCATAAACCCTCTTGGAAATGTTTGCTCTGGCAAAA	1	+	chr1:38685972-38686091
AFF3	BA_678916_000097	ACAGTGTATCTGGAGAGAAGGAGGGGGGAAATGTGCCTTACAGATACCTACTTAGCATAAACCCTCTTGGAAATGTTTGCTCTGGCAAAAGTGAGCTATAGACATCACATGGAGACAGCC	1	+	chr1:38686002-38686121
AFF3	BA_678916_000098	ATGTGCCTTACAGATACCTACTTAGCATAAACCCTCTTGGAAATGTTTGCTCTGGCAAAAGTGAGCTATAGACATCACATGGAGACAGCCTTCCCAGGAACAAAGGCTGGGGGTGGAGGG	1	+	chr1:38686032-38686151
AFF3	BA_678916_000099	ACCCTCTTGGAAATGTTTGCTCTGGCAAAAGTGAGCTATAGACATCACATGGAGACAGCCTTCCCAGGAACAAAGGCTGGGGGTGGAGGGTGGAGGAGAGAGAGAGAGGGGAACAGCCCC	1	+	chr1:38686062-38686181
AFF3	BA_678916_000100	GTGAGCTATAGACATCACATGGAGACAGCCTTCCCAGGAACAAAGGCTGGGGGTGGAGGGTGGAGGAGAGAGAGAGAGGGGAACAGCCCCTGCCTGGAAGAACTGCAAGTTCCAAGGCCT	1	+	chr1:38686092-38686211
AKAP11	BA_678916_000645	ATCCAAAGTTACTTCAATTGCTTTCCAAACACAAGACAAAGCAACCATTGCTCTAAAAGTCTGAAACCCTTGCCACAACTTAGAAAGACTAGCAACAAAGATGAGTGGAAGGGAACTTTT	1	+	chr14:78935079-78935198
AKAP11	BA_678916_000646	ACAAGACAAAGCAACCATTGCTCTAAAAGTCTGAAACCCTTGCCACAACTTAGAAAGACTAGCAACAAAGATGAGTGGAAGGGAACTTTTGCTAACTCCTTTGCCCACTCACCTAAGTTT	1	+	chr14:78935109-78935228
AKAP11	BA_678916_000647	CTGAAACCCTTGCCACAACTTAGAAAGACTAGCAACAAAGATGAGTGGAAGGGAACTTTTGCTAACTCCTTTGCCCACTCACCTAAGTTTTTCATATCTCCCTGTGTGACTAGAATTCCC	1	+	chr14:78935139-78935258
AKAP11	BA_678916_000648	AGCAACAAAGATGAGTGGAAGGGAACTTTTGCTAACTCCTTTGCCCACTCACCTAAGTTTTTCATATCTCCCTGTGTGACTAGAATTCCCCTATTTATAGCTGGAAATTTCCCTTTACAC	1	+	chr14:78935169-78935288
AKAP11	BA_678916_000649	GCTAACTCCTTTGCCCACTCACCTAAGTTTTTCATATCTCCCTGTGTGACTAGAATTCCCCTATTTATAGCTGGAAATTTCCCTTTACACAACCTGCTGCATTATGATCGGAATTGGCTG	1	+	chr14:78935199-78935318
AKAP11	BA_678916_000650	TTCATATCTCCCTGTGTGACTAGAATTCCCCTATTTATAGCTGGAAATTTCCCTTTACACAACCTGCTGCATTATGATCGGAATTGGCTGAGTTCCTTTCCCAGACACTAAGTCTTTGGA	1	+	chr14:78935229-78935348
AKAP11	BA_678916_000651	CTATTTATAGCTGGAAATTTCCCTTTACACAACCTGCTGCATTATGATCGGAATTGGCTGAGTTCCTTTCCCAGACACTAAGTCTTTGGAATTAAAATAAAATGTACCATCCTTTCTCCC	1	+	chr14:78935259-78935378
AKAP11	BA_678916_000652	AACCTGCTGCATTATGATCGGAATTGGCTGAGTTCCTTTCCCAGACACTAAGTCTTTGGAATTAAAATAAAATGTACCATCCTTTCTCCCAAAGGATTTTCTTCTGTTTCCCTGACGAAG	1	+	chr14:78935289-78935408
AKAP11	BA_678916_000653	AGTTCCTTTCCCAGACACTAAGTCTTTGGAATTAAAATAAAATGTACCATCCTTTCTCCCAAAGGATTTTCTTCTGTTTCCCTGACGAAGCCCTGGAATTCAGAGGCTTGAGAAGGCTAG	1	+	chr14:78935319-78935438
AKAP11	BA_678916_000654	ATTAAAATAAAATGTACCATCCTTTCTCCCAAAGGATTTTCTTCTGTTTCCCTGACGAAGCCCTGGAATTCAGAGGCTTGAGAAGGCTAGCAAATCTCTCACTACAGTTCTGGGCCTCCA	1	+	chr14:78935349-78935468
AKAP11	BA_678916_000655	AAAGGATTTTCTTCTGTTTCCCTGACGAAGCCCTGGAATTCAGAGGCTTGAGAAGGCTAGCAAATCTCTCACTACAGTTCTGGGCCTCCAACTTCAGAATCTTCAACAACTGAGAAACAT	1	+	chr14:78935379-78935498
AKAP11	BA_678916_000656	CCCTGGAATTCAGAGGCTTGAGAAGGCTAGCAAATCTCTCACTACAGTTCTGGGCCTCCAACTTCAGAATCTTCAACAACTGAGAAACATCACTGGGCACAGAGTATATACTGCCAATTC	1	+	chr14:78935409-78935528
AKAP11	BA_678916_000657	CAAATCTCTCACTACAGTTCTGGGCCTCCAACTTCAGAATCTTCAACAACTGAGAAACATCACTGGGCACAGAGTATATACTGCCAATTCCTTTCCAGGCAGATCAGTTGAGCAGTTCTG	1	+	chr14:78935439-78935558
AKAP11	BA_678916_000658	ACTTCAGAATCTTCAACAACTGAGAAACATCACTGGGCACAGAGTATATACTGCCAATTCCTTTCCAGGCAGATCAGTTGAGCAGTTCTGTAGCTATCTACATTAGCCACAGCTCAGCTT	1	+	chr14:78935469-78935588
AKAP11	BA_678916_000659	CACTGGGCACAGAGTATATACTGCCAATTCCTTTCCAGGCAGATCAGTTGAGCAGTTCTGTAGCTATCTACATTAGCCACAGCTCAGCTTATAAACCCACGTCTTCCCCAATTCCCTCAT	1	+	chr14:78935499-78935618
AKAP11	BA_678916_000660	CTTTCCAGGCAGATCAGTTGAGCAGTTCTGTAGCTATCTACATTAGCCACAGCTCAGCTTATAAACCCACGTCTTCCCCAATTCCCTCATATCCCTTCATCCCTCATAAGTCAGTTACTA	1	+	chr14:78935529-78935648
AKAP11	BA_678916_000661	TAGCTATCTACATTAGCCACAGCTCAGCTTATAAACCCACGTCTTCCCCAATTCCCTCATATCCCTTCATCCCTCATAAGTCAGTTACTAACTACACAACTAATTGCTTAATTTACTGCC	1	+	chr14:78935559-78935678
AKAP11	BA_678916_000662	ATAAACCCACGTCTTCCCCAATTCCCTCATATCCCTTCATCCCTCATAAGTCAGTTACTAACTACACAACTAATTGCTTAATTTACTGCCAACCTATGATTCACAATCCTGCCTGGAAAA	1	+	chr14:78935589-78935708
AKAP11	BA_678916_000663	ATCCCTTCATCCCTCATAAGTCAGTTACTAACTACACAACTAATTGCTTAATTTACTGCCAACCTATGATTCACAATCCTGCCTGGAAAACACAATCAAGTATGAATAACCAGGTTATTC	1	+	chr14:78935619-78935738
AKAP11	BA_678916_000664	ACTACACAACTAATTGCTTAATTTACTGCCAACCTATGATTCACAATCCTGCCTGGAAAACACAATCAAGTATGAATAACCAGGTTATTCCTTGAAAAAAATGCTTCTATAGTTTGAAAG	1	+	chr14:78935649-78935768
AKAP11	BA_678916_000665	AACCTATGATTCACAATCCTGCCTGGAAAACACAATCAAGTATGAATAACCAGGTTATTCCTTGAAAAAAATGCTTCTATAGTTTGAAAGATTAGGTGGGACTATTGAAAATGACATCAA	1	+	chr14:78935679-78935798
AKAP11	BA_678916_000666	CACAATCAAGTATGAATAACCAGGTTATTCCTTGAAAAAAATGCTTCTATAGTTTGAAAGATTAGGTGGGACTATTGAAAATGACATCAATCATACTAGGCTGCCTTTTACCAGCACACA	1	+	chr14:78935709-78935828
AKAP11	BA_678916_000667	CACACACACCAAGCAAACACAAAGACATTAAAACAAAATCACCTTTGCATGAATAAATACTCCATCTTTCCTGATGCCCTTATTTTATATATTTTCATACATAACAAAATTGAGTACCAA	1	+	chr14:78935845-78935964
AKAP11	BA_678916_000668	AAACAAAATCACCTTTGCATGAATAAATACTCCATCTTTCCTGATGCCCTTATTTTATATATTTTCATACATAACAAAATTGAGTACCAATATAAATAACACTGCTAACAAGGTGAGAAA	1	+	chr14:78935875-78935994
AKAP11	BA_678916_000669	TCCATCTTTCCTGATGCCCTTATTTTATATATTTTCATACATAACAAAATTGAGTACCAATATAAATAACACTGCTAACAAGGTGAGAAAGATGCAAAGGAAAACAAGCGATTTAGAAGC	1	+	chr14:78935905-78936024
AKAP11	BA_678916_000670	ATTTTCATACATAACAAAATTGAGTACCAATATAAATAACACTGCTAACAAGGTGAGAAAGATGCAAAGGAAAACAAGCGATTTAGAAGCAAATGGATAATCACAAGGCTATAAAAGAAC	1	+	chr14:78935935-78936054
AKAP11	BA_678916_000671	TATAAATAACACTGCTAACAAGGTGAGAAAGATGCAAAGGAAAACAAGCGATTTAGAAGCAAATGGATAATCACAAGGCTATAAAAGAACTGCGAATATTAACTCCAGTATGCGCCAAGG	1	+	chr14:78935965-78936084
AKAP11	BA_678916_000672	GATGCAAAGGAAAACAAGCGATTTAGAAGCAAATGGATAATCACAAGGCTATAAAAGAACTGCGAATATTAACTCCAGTATGCGCCAAGGCCATTAGCGATGTGTCTCAGCAGTATTGCT	1	+	chr14:78935995-78936114
AKAP11	BA_678916_000673	AAATGGATAATCACAAGGCTATAAAAGAACTGCGAATATTAACTCCAGTATGCGCCAAGGCCATTAGCGATGTGTCTCAGCAGTATTGCTCACCGCAAAATGCCTTAATGCCTAAAGCTA	1	+	chr14:78936025-78936144
AKAP11	BA_678916_000674	TGCGAATATTAACTCCAGTATGCGCCAAGGCCATTAGCGATGTGTCTCAGCAGTATTGCTCACCGCAAAATGCCTTAATGCCTAAAGCTAAGCCACCTCCAACTAATAGGGTTTTTTTTT	1	+	chr14:78936055-78936174
AKAP11	BA_678916_000675	TTTAAAGACCGTAGGCAGAGCTAAAGGACTGTCACCAAGCTATACCAGGGGTTTAGACTGTACTGTCACTGTGGTCTGGCCAGCCCATTTTCTATTTGATAGCGCAATTCGGATGCTTGG	1	+	chr14:78936188-78936307
AKAP11	BA_678916_000676	GTCACCAAGCTATACCAGGGGTTTAGACTGTACTGTCACTGTGGTCTGGCCAGCCCATTTTCTATTTGATAGCGCAATTCGGATGCTTGGCCAGCCTGGAGGCGACGTGACAGCGATGCA	1	+	chr14:78936218-78936337
AKAP11	BA_678916_000677	TACTGTCACTGTGGTCTGGCCAGCCCATTTTCTATTTGATAGCGCAATTCGGATGCTTGGCCAGCCTGGAGGCGACGTGACAGCGATGCAAACAGCGGCATCTGGGGTTAGGGCAGCGCC	1	+	chr14:78936248-78936367
AKAP11	BA_678916_000678	TCTATTTGATAGCGCAATTCGGATGCTTGGCCAGCCTGGAGGCGACGTGACAGCGATGCAAACAGCGGCATCTGGGGTTAGGGCAGCGCCGGGGACCTGGGTTCGGACGCTGACAGGGAA	1	+	chr14:78936278-78936397
AKAP11	BA_678916_000679	CCAGCCTGGAGGCGACGTGACAGCGATGCAAACAGCGGCATCTGGGGTTAGGGCAGCGCCGGGGACCTGGGTTCGGACGCTGACAGGGAAGGATGCTGCTGCGGAGGACAAAGTGCACCG	2	+	chr14:78936308-78936427
AKAP11	BA_678916_000680	AACAGCGGCATCTGGGGTTAGGGCAGCGCCGGGGACCTGGGTTCGGACGCTGACAGGGAAGGATGCTGCTGCGGAGGACAAAGTGCACCGTCCTCCCGCCCGCGCCCCACGCAGCGAGGC	2	+	chr14:78936338-78936457
AKAP11	BA_678916_000681	GGGGACCTGGGTTCGGACGCTGACAGGGAAGGATGCTGCTGCGGAGGACAAAGTGCACCGTCCTCCCGCCCGCGCCCCACGCAGCGAGGCCACGGCGCCCGGCCGCAGTCTGGACCCGGC	2	+	chr14:78936368-78936487
AKAP11	BA_678916_000682	GGATGCTGCTGCGGAGGACAAAGTGCACCGTCCTCCCGCCCGCGCCCCACGCAGCGAGGCCACGGCGCCCGGCCGCAGTCTGGACCCGGCCCTCTGGCTCCCGGTTCCCTGCCCCGCTCA	2	+	chr14:78936398-78936517
AKAP11	BA_678916_000683	TCCTCCCGCCCGCGCCCCACGCAGCGAGGCCACGGCGCCCGGCCGCAGTCTGGACCCGGCCCTCTGGCTCCCGGTTCCCTGCCCCGCTCACCAGGCGGCACAGCCTCTCAGCTCCCGGGC	2	+	chr14:78936428-78936547
AKAP11	BA_678916_000684	CACGGCGCCCGGCCGCAGTCTGGACCCGGCCCTCTGGCTCCCGGTTCCCTGCCCCGCTCACCAGGCGGCACAGCCTCTCAGCTCCCGGGCATGTCAGCCTCCCGTCACGGCCCGCAACGC	2	+	chr14:78936458-78936577
AKAP11	BA_678916_000685	CCTCTGGCTCCCGGTTCCCTGCCCCGCTCACCAGGCGGCACAGCCTCTCAGCTCCCGGGCATGTCAGCCTCCCGTCACGGCCCGCAACGCCCGGTGGCGCGAGCCGCAGCGCAGCGGCGC	2	+	chr14:78936488-78936607
AKAP11	BA_678916_000686	CCAGGCGGCACAGCCTCTCAGCTCCCGGGCATGTCAGCCTCCCGTCACGGCCCGCAACGCCCGGTGGCGCGAGCCGCAGCGCAGCGGCGCTCCCCCTCGCCCGCCCCAGCCCGCGACGCC	2	+	chr14:78936518-78936637
AKAP11	BA_678916_000687	ATGTCAGCCTCCCGTCACGGCCCGCAACGCCCGGTGGCGCGAGCCGCAGCGCAGCGGCGCTCCCCCTCGCCCGCCCCAGCCCGCGACGCCACCGCCGCCGCCTCCCCACGCCGCCCACTC	2	+	chr14:78936548-78936667
AKAP11	BA_678916_000688	CCGGTGGCGCGAGCCGCAGCGCAGCGGCGCTCCCCCTCGCCCGCCCCAGCCCGCGACGCCACCGCCGCCGCCTCCCCACGCCGCCCACTCACTCTCGCGAGAGCCGTCGCACCTCTCGCG	2	+	chr14:78936578-78936697
AKAP11	BA_678916_000689	TCCCCCTCGCCCGCCCCAGCCCGCGACGCCACCGCCGCCGCCTCCCCACGCCGCCCACTCACTCTCGCGAGAGCCGTCGCACCTCTCGCGAGAACGACCCCGTGGCCGAGCCCGCGCAAA	2	+	chr14:78936608-78936727
AKAP11	BA_678916_000690	ACCGCCGCCGCCTCCCCACGCCGCCCACTCACTCTCGCGAGAGCCGTCGCACCTCTCGCGAGAACGACCCCGTGGCCGAGCCCGCGCAAAAGGAACAAGGGGTGGGGGGAAAATATCTTC	2	+	chr14:78936638-78936757
AKAP11	BA_678916_000691	ACTCTCGCGAGAGCCGTCGCACCTCTCGCGAGAACGACCCCGTGGCCGAGCCCGCGCAAAAGGAACAAGGGGTGGGGGGAAAATATCTTCCCACGTGCTCTGGAGGGCAAAGCTGCGGGT	1	+	chr14:78936668-78936787
AKAP11	BA_678916_000692	AGAACGACCCCGTGGCCGAGCCCGCGCAAAAGGAACAAGGGGTGGGGGGAAAATATCTTCCCACGTGCTCTGGAGGGCAAAGCTGCGGGTCGCCCGTCACGTGACGCGGAGGCGCCCTCT	2	+	chr14:78936698-78936817
AKAP11	BA_678916_000693	AGGAACAAGGGGTGGGGGGAAAATATCTTCCCACGTGCTCTGGAGGGCAAAGCTGCGGGTCGCCCGTCACGTGACGCGGAGGCGCCCTCTCCATTGGCCAGGCGGCCCTCGGCCCGTGGG	2	+	chr14:78936728-78936847
AKAP11	BA_678916_000694	CCACGTGCTCTGGAGGGCAAAGCTGCGGGTCGCCCGTCACGTGACGCGGAGGCGCCCTCTCCATTGGCCAGGCGGCCCTCGGCCCGTGGGAGCTTTAAACCTCGAGCTGACCTACGAACT	2	+	chr14:78936758-78936877
AKAP11	BA_678916_000695	CGCCCGTCACGTGACGCGGAGGCGCCCTCTCCATTGGCCAGGCGGCCCTCGGCCCGTGGGAGCTTTAAACCTCGAGCTGACCTACGAACTCTCGGCTGACGTCTTGCGCGCTTCCTGGTG	2	+	chr14:78936788-78936907
AKAP11	BA_678916_000696	CCATTGGCCAGGCGGCCCTCGGCCCGTGGGAGCTTTAAACCTCGAGCTGACCTACGAACTCTCGGCTGACGTCTTGCGCGCTTCCTGGTGCGTTGCCTTGGGAACGGCTTAACCCTTTCC	1	+	chr14:78936818-78936937
AKAP11	BA_678916_000697	AGCTTTAAACCTCGAGCTGACCTACGAACTCTCGGCTGACGTCTTGCGCGCTTCCTGGTGCGTTGCCTTGGGAACGGCTTAACCCTTTCCTCTGGCAAGCGCCCGAGCCCAGGATGCTGG	1	+	chr14:78936848-78936967
AKAP11	BA_678916_000698	CTCGGCTGACGTCTTGCGCGCTTCCTGGTGCGTTGCCTTGGGAACGGCTTAACCCTTTCCTCTGGCAAGCGCCCGAGCCCAGGATGCTGGCATCCCATCCGCCACCCTTAGACCTTCCTG	1	+	chr14:78936878-78936997
AKAP11	BA_678916_000699	CGTTGCCTTGGGAACGGCTTAACCCTTTCCTCTGGCAAGCGCCCGAGCCCAGGATGCTGGCATCCCATCCGCCACCCTTAGACCTTCCTGGGGCTGGTTTCCCACAGCCAGTGGCAGCCC	1	+	chr14:78936908-78937027
AKAP11	BA_678916_000700	TCTGGCAAGCGCCCGAGCCCAGGATGCTGGCATCCCATCCGCCACCCTTAGACCTTCCTGGGGCTGGTTTCCCACAGCCAGTGGCAGCCCACGACATCAGGGGTCCAGACACAGCCCATC	2	+	chr14:78936938-78937057
AKAP11	BA_678916_000701	CATCCCATCCGCCACCCTTAGACCTTCCTGGGGCTGGTTTCCCACAGCCAGTGGCAGCCCACGACATCAGGGGTCCAGACACAGCCCATCCTTCAGAATGGGTCTGCCCGGTTCCCAACA	1	+	chr14:78936968-78937087
AKAP11	BA_678916_000702	GGGCTGGTTTCCCACAGCCAGTGGCAGCCCACGACATCAGGGGTCCAGACACAGCCCATCCTTCAGAATGGGTCTGCCCGGTTCCCAACATCATCAGGGGAAACCACTGAGGAAGCCTTG	1	+	chr14:78936998-78937117
AKAP11	BA_678916_000703	ACGACATCAGGGGTCCAGACACAGCCCATCCTTCAGAATGGGTCTGCCCGGTTCCCAACATCATCAGGGGAAACCACTGAGGAAGCCTTGGGCCCAATCGGAACCTCTGGAGTCAGTCTA	1	+	chr14:78937028-78937147
AKAP11	BA_678916_000704	CTTCAGAATGGGTCTGCCCGGTTCCCAACATCATCAGGGGAAACCACTGAGGAAGCCTTGGGCCCAATCGGAACCTCTGGAGTCAGTCTAAAGGGCAGTGCACTTCCCAACCCCACGGGC	1	+	chr14:78937058-78937177
AKAP11	BA_678916_000705	TCATCAGGGGAAACCACTGAGGAAGCCTTGGGCCCAATCGGAACCTCTGGAGTCAGTCTAAAGGGCAGTGCACTTCCCAACCCCACGGGCCATTGAAATTGGAAAATAAGGCTTTGACCA	1	+	chr14:78937088-78937207
AKAP11	BA_678916_000706	GGCCCAATCGGAACCTCTGGAGTCAGTCTAAAGGGCAGTGCACTTCCCAACCCCACGGGCCATTGAAATTGGAAAATAAGGCTTTGACCACCAAGAAGCCTAGCCTTGGGTGACAAGCTG	1	+	chr14:78937118-78937237
AKAP11	BA_678916_000707	AAGGGCAGTGCACTTCCCAACCCCACGGGCCATTGAAATTGGAAAATAAGGCTTTGACCACCAAGAAGCCTAGCCTTGGGTGACAAGCTGTGTGATTCCTGTTTAAATCAGAGGAATCGG	1	+	chr14:78937148-78937267
AKAP11	BA_678916_000708	CATTGAAATTGGAAAATAAGGCTTTGACCACCAAGAAGCCTAGCCTTGGGTGACAAGCTGTGTGATTCCTGTTTAAATCAGAGGAATCGGTGCAGTCATGTTGCATGGTCTCCTCAAGGA	1	+	chr14:78937178-78937297
AKAP11	BA_678916_000709	CCAAGAAGCCTAGCCTTGGGTGACAAGCTGTGTGATTCCTGTTTAAATCAGAGGAATCGGTGCAGTCATGTTGCATGGTCTCCTCAAGGACATACGGTCCTCAAACTGGCCGAGAGATGA	1	+	chr14:78937208-78937327
AKAP11	BA_678916_000710	TGTGATTCCTGTTTAAATCAGAGGAATCGGTGCAGTCATGTTGCATGGTCTCCTCAAGGACATACGGTCCTCAAACTGGCCGAGAGATGAGAAGGACATTTTGAAGTAGATGCTCCTTAT	1	+	chr14:78937238-78937357
AKAP11	BA_678916_000711	TGCAGTCATGTTGCATGGTCTCCTCAAGGACATACGGTCCTCAAACTGGCCGAGAGATGAGAAGGACATTTTGAAGTAGATGCTCCTTATTTGTTTTATCCTCTTTAGGGGAGAGAGACA	1	+	chr14:78937268-78937387
AKAP11	BA_678916_000712	CATACGGTCCTCAAACTGGCCGAGAGATGAGAAGGACATTTTGAAGTAGATGCTCCTTATTTGTTTTATCCTCTTTAGGGGAGAGAGACAAGAAAGAGTACAGTCATATCTTCGTTCTCT	1	+	chr14:78937298-78937417
AKAP11	BA_678916_000713	GAAGGACATTTTGAAGTAGATGCTCCTTATTTGTTTTATCCTCTTTAGGGGAGAGAGACAAGAAAGAGTACAGTCATATCTTCGTTCTCTTCAACAGCTTTTGGCTGCTTTCCTTACACG	1	+	chr14:78937328-78937447
AKAP11	BA_678916_000714	TTGTTTTATCCTCTTTAGGGGAGAGAGACAAGAAAGAGTACAGTCATATCTTCGTTCTCTTCAACAGCTTTTGGCTGCTTTCCTTACACGTTTTAGGCATAATTCCAGGTTGTCTATTGA	1	+	chr14:78937358-78937477
AKAP11	BA_678916_000715	AGAAAGAGTACAGTCATATCTTCGTTCTCTTCAACAGCTTTTGGCTGCTTTCCTTACACGTTTTAGGCATAATTCCAGGTTGTCTATTGAACACTATGAAGACAAATAGATTAGGTTGTT	1	+	chr14:78937388-78937507
AKAP11	BA_678916_000716	TCAACAGCTTTTGGCTGCTTTCCTTACACGTTTTAGGCATAATTCCAGGTTGTCTATTGAACACTATGAAGACAAATAGATTAGGTTGTTGAGAGCTGGGGCCGGGTTGGGGGAGGGGGT	1	+	chr14:78937418-78937537
AKAP11	BA_678916_000717	TTTTAGGCATAATTCCAGGTTGTCTATTGAACACTATGAAGACAAATAGATTAGGTTGTTGAGAGCTGGGGCCGGGTTGGGGGAGGGGGTGGATATCTGTAGGTGTTAACTCGCAGATTA	1	+	chr14:78937448-78937567
AKAP11	BA_678916_000718	ACACTATGAAGACAAATAGATTAGGTTGTTGAGAGCTGGGGCCGGGTTGGGGGAGGGGGTGGATATCTGTAGGTGTTAACTCGCAGATTATCATCATCTGATGGTGGTGGTTACAATTGG	1	+	chr14:78937478-78937597
AKAP11	BA_678916_000719	GAGAGCTGGGGCCGGGTTGGGGGAGGGGGTGGATATCTGTAGGTGTTAACTCGCAGATTATCATCATCTGATGGTGGTGGTTACAATTGGGCCACTGCTTGGGGGTGGTGCCCTTGTGGG	1	+	chr14:78937508-78937627
AKAP11	BA_678916_000720	GGATATCTGTAGGTGTTAACTCGCAGATTATCATCATCTGATGGTGGTGGTTACAATTGGGCCACTGCTTGGGGGTGGTGCCCTTGTGGGAGGAAAGATTCAGGCAGTGATTTGGATAGC	1	+	chr14:78937538-78937657
AKAP11	BA_678916_000721	TCATCATCTGATGGTGGTGGTTACAATTGGGCCACTGCTTGGGGGTGGTGCCCTTGTGGGAGGAAAGATTCAGGCAGTGATTTGGATAGCAGCCCTACATCGCTAGCAGAAAGTAGAATA	1	+	chr14:78937568-78937687
AKAP11	BA_678916_000722	GCCACTGCTTGGGGGTGGTGCCCTTGTGGGAGGAAAGATTCAGGCAGTGATTTGGATAGCAGCCCTACATCGCTAGCAGAAAGTAGAATAATTCACAAGCCCCAAATCCGGATCTAATCT	1	+	chr14:78937598-78937717
AKAP11	BA_678916_000723	AGGAAAGATTCAGGCAGTGATTTGGATAGCAGCCCTACATCGCTAGCAGAAAGTAGAATAATTCACAAGCCCCAAATCCGGATCTAATCTAGCACATTTGAATAACAAGAAATAAACTTG	1	+	chr14:78937628-78937747
AKAP11	BA_678916_000724	AGCCCTACATCGCTAGCAGAAAGTAGAATAATTCACAAGCCCCAAATCCGGATCTAATCTAGCACATTTGAATAACAAGAAATAAACTTGGGATGATAATAGAGGCTAGATCCCTTACTG	1	+	chr14:78937658-78937777
AKAP11	BA_678916_000725	ATTCACAAGCCCCAAATCCGGATCTAATCTAGCACATTTGAATAACAAGAAATAAACTTGGGATGATAATAGAGGCTAGATCCCTTACTGCTTCATCAACCAAGAAAAGAACTGGGAGTT	1	+	chr14:78937688-78937807
AKAP11	BA_678916_000726	AGCACATTTGAATAACAAGAAATAAACTTGGGATGATAATAGAGGCTAGATCCCTTACTGCTTCATCAACCAAGAAAAGAACTGGGAGTTTAGTCTACAATGAAAAGCTTTGACCTCTTA	1	+	chr14:78937718-78937837
AKAP11	BA_678916_000727	GGATGATAATAGAGGCTAGATCCCTTACTGCTTCATCAACCAAGAAAAGAACTGGGAGTTTAGTCTACAATGAAAAGCTTTGACCTCTTAAAGGGGGGAACAATAACAATTAGTTTAAAA	1	+	chr14:78937748-78937867
AKAP11	BA_678916_000728	CTTCATCAACCAAGAAAAGAACTGGGAGTTTAGTCTACAATGAAAAGCTTTGACCTCTTAAAGGGGGGAACAATAACAATTAGTTTAAAAAAAAAAACAAAAAACTAGTAAGCTCTTCCC	1	+	chr14:78937778-78937897
AKAP11	BA_678916_000729	TAGTCTACAATGAAAAGCTTTGACCTCTTAAAGGGGGGAACAATAACAATTAGTTTAAAAAAAAAAACAAAAAACTAGTAAGCTCTTCCCTGTAGAGAGTGAATTTTACGGAAGCTGAAA	1	+	chr14:78937808-78937927
AKAP11	BA_678916_000730	AAGGGGGGAACAATAACAATTAGTTTAAAAAAAAAAACAAAAAACTAGTAAGCTCTTCCCTGTAGAGAGTGAATTTTACGGAAGCTGAAACAACAAGGAACTCGTCCAGGTAAAAGACAA	1	+	chr14:78937838-78937957
AKAP11	BA_678916_000731	AAAAAAACAAAAAACTAGTAAGCTCTTCCCTGTAGAGAGTGAATTTTACGGAAGCTGAAACAACAAGGAACTCGTCCAGGTAAAAGACAATCCTGTGAGAACCAATTTCCAATGACCTTG	1	+	chr14:78937868-78937987
AKAP11	BA_678916_000732	TGTAGAGAGTGAATTTTACGGAAGCTGAAACAACAAGGAACTCGTCCAGGTAAAAGACAATCCTGTGAGAACCAATTTCCAATGACCTTGACAGTCTCCAAAATGTGTTAAGTCAGAGCC	1	+	chr14:78937898-78938017
AKAP11	BA_678916_000733	CAACAAGGAACTCGTCCAGGTAAAAGACAATCCTGTGAGAACCAATTTCCAATGACCTTGACAGTCTCCAAAATGTGTTAAGTCAGAGCCCTAAGCGCTGGCTGCTGACTTGTATTTAAA	1	+	chr14:78937928-78938047
AKAP11	BA_678916_000734	TCCTGTGAGAACCAATTTCCAATGACCTTGACAGTCTCCAAAATGTGTTAAGTCAGAGCCCTAAGCGCTGGCTGCTGACTTGTATTTAAAATATGTAGATTTTTTTTTTTTTTTATCATT	1	+	chr14:78937958-78938077
AKAP11	BA_678916_000735	ACAGTCTCCAAAATGTGTTAAGTCAGAGCCCTAAGCGCTGGCTGCTGACTTGTATTTAAAATATGTAGATTTTTTTTTTTTTTTATCATTTTGTTGTTTTAAACTACTTGAGAAGCGAAT	1	+	chr14:78937988-78938107
AKAP11	BA_678916_000736	CTAAGCGCTGGCTGCTGACTTGTATTTAAAATATGTAGATTTTTTTTTTTTTTTATCATTTTGTTGTTTTAAACTACTTGAGAAGCGAATGGCCTGAGAGGCCTCTTGCCTTTGGCTTTC	1	+	chr14:78938018-78938137
AKAP11	BA_678916_000737	ATATGTAGATTTTTTTTTTTTTTTATCATTTTGTTGTTTTAAACTACTTGAGAAGCGAATGGCCTGAGAGGCCTCTTGCCTTTGGCTTTCTGTCCTCCATTTTCACTACACAGGTAGCCG	1	+	chr14:78938048-78938167
ALDH1A2	BA_593036_005822	TCTCACAAATTCAATTAAGACAACAGCATTCTGTCTGCACAGAATCTAAGCACCAATCATTTACGGAATTTTAGTTAATGAACACATCTAAAGTAAGTGTTTTGTAGTGAACAACATGCA	1	+	chr9:71062557-71062676
ALDH1A2	BA_593036_005823	TTACGGAATTTTAGTTAATGAACACATCTAAAGTAAGTGTTTTGTAGTGAACAACATGCAAAGAAATGATTGAGCAAGAGCGAAGCAGTTGCTTGGGAGTTGAGAGTCTTCCATAGAAAA	1	+	chr9:71062617-71062736
ALDH1A2	BA_593036_005824	AAGAAATGATTGAGCAAGAGCGAAGCAGTTGCTTGGGAGTTGAGAGTCTTCCATAGAAAAACAGGAAGAGTCAGGTTGGATAAGGCTGTGGGATTTTCATGGGGATAGAGGCAGAAAGCC	1	+	chr9:71062677-71062796
ALDH1A2	BA_593036_005825	ACAGGAAGAGTCAGGTTGGATAAGGCTGTGGGATTTTCATGGGGATAGAGGCAGAAAGCCCTATAAAGAGCTATCTATATGGGCTCGTGATATTGGTCCAATGATTCTCCCACGCTATCT	1	+	chr9:71062737-71062856
ALDH1A2	BA_593036_005826	CTATAAAGAGCTATCTATATGGGCTCGTGATATTGGTCCAATGATTCTCCCACGCTATCTGGAGTGAACTGTCTAGGCTACTGATTCCTGATCAGCGCCCATCTTTACTCAACTATAAGG	1	+	chr9:71062797-71062916
ALDH1A2	BA_593036_005827	GGAGTGAACTGTCTAGGCTACTGATTCCTGATCAGCGCCCATCTTTACTCAACTATAAGGCTGCTTGTAAGACGAGAAGGGATGGAGATGGAAGCTCAACCCGGAGATTCTGACAGGAAG	1	+	chr9:71062857-71062976
ALDH1A2	BA_593036_005828	CTGCTTGTAAGACGAGAAGGGATGGAGATGGAAGCTCAACCCGGAGATTCTGACAGGAAGAGCAACAGAAAATCCCAAGTGTTTCCCGGTGTGGATGGGAAGAGGAAAGGAAAGGGCTGG	1	+	chr9:71062917-71063036
ALDH1A2	BA_593036_005829	AGCAACAGAAAATCCCAAGTGTTTCCCGGTGTGGATGGGAAGAGGAAAGGAAAGGGCTGGAAGGAGACCATCAAGACCTGGAATATCCAGGCAACCCAAGGCAGATGAAGCCCACGGCCT	1	+	chr9:71062977-71063096
ALDH1A2	BA_593036_005830	AAGGAGACCATCAAGACCTGGAATATCCAGGCAACCCAAGGCAGATGAAGCCCACGGCCTCAGGCACAACTAGGCCGCGGGGCCGGCAGAGGGCAGCAGTTGGGCTGAGAAGCCTGGTGG	1	+	chr9:71063037-71063156
ALDH1A2	BA_593036_005831	CAGGCACAACTAGGCCGCGGGGCCGGCAGAGGGCAGCAGTTGGGCTGAGAAGCCTGGTGGGGGCCAGCGCGGCGTCGGCGGTTCCAGAAGGTTCTCCTTGGGAGTGTGGGGAGCATCTAT	2	+	chr9:71063097-71063216
ALDH1A2	BA_593036_005832	GGGCCAGCGCGGCGTCGGCGGTTCCAGAAGGTTCTCCTTGGGAGTGTGGGGAGCATCTATCACCCCACCCAGCGGCCACGCGCCCCTCGCGCCACGCGGAAGGCTGAGCGAAAGCTCTTT	2	+	chr9:71063157-71063276
ALDH1A2	BA_593036_005833	CACCCCACCCAGCGGCCACGCGCCCCTCGCGCCACGCGGAAGGCTGAGCGAAAGCTCTTTCGGGCTGCTCGGGACCCCGGGGGAGGAGAAGAGCGAGTGTTAGGAAGGGCGCGGGGCTCG	2	+	chr9:71063217-71063336
ALDH1A2	BA_593036_005834	CGGGCTGCTCGGGACCCCGGGGGAGGAGAAGAGCGAGTGTTAGGAAGGGCGCGGGGCTCGGCGGGGCCGCGGCTCGGGCGCCTCTCCTCCCGGCCGACCAGCGCTAAGGCTCGCGGGGCT	2	+	chr9:71063277-71063396
ALDH1A2	BA_593036_005835	GCGGGGCCGCGGCTCGGGCGCCTCTCCTCCCGGCCGACCAGCGCTAAGGCTCGCGGGGCTGCCATCGGCCAGCGCGGTCCCGCCGAGGCTGCGCTCCGGCCGTCGAGGCCCCCCCGGGCG	2	+	chr9:71063337-71063456
ALDH1A2	BA_593036_005836	CCCCGGGCGCGCCCGCGGGAGCGTGGGCCGCGGACTTGACCGTGCGGGCGCCGCGCGCGGCCGTATGCAAATGTCCTCCTGGGCCGGCCCCCCGCGCCTGTGGGCCGCACGTCCAATAAG	2	+	chr9:71063448-71063567
ALDH1A2	BA_593036_005837	CCGTATGCAAATGTCCTCCTGGGCCGGCCCCCCGCGCCTGTGGGCCGCACGTCCAATAAGAAGCGCCCCCCGCTTGACACCTGCCTATATACAGCGAGCGCGCCCCGGCCGCGCAGCGCC	2	+	chr9:71063508-71063627
ALDH1A2	BA_593036_005838	AAGCGCCCCCCGCTTGACACCTGCCTATATACAGCGAGCGCGCCCCGGCCGCGCAGCGCCCCGCGCACACCCACCCGTGGCCGCCCATGACTTCCAGCGAGATCGCCATGCCGGGCGAGG	2	+	chr9:71063568-71063687
ALDH1A2	BA_593036_005839	CCGCGCACACCCACCCGTGGCCGCCCATGACTTCCAGCGAGATCGCCATGCCGGGCGAGGTGAAGGCCGACCCCGCCGCGCTCATGGCCTCGCTGCAGCTCCTGCCGTCGCCCACGCCCA	2	+	chr9:71063628-71063747
ALDH1A2	BA_593036_005840	TGAAGGCCGACCCCGCCGCGCTCATGGCCTCGCTGCAGCTCCTGCCGTCGCCCACGCCCAACCTCGAGATCAAGTACACCAAGGTAAAGCCGTCCGGCGGACGCTTTCTGGAAGCATCCT	2	+	chr9:71063688-71063807
ALDH1A2	BA_593036_005841	ACCTCGAGATCAAGTACACCAAGGTAAAGCCGTCCGGCGGACGCTTTCTGGAAGCATCCTCTGGATCCCTTCAGAGGCCGGGGGCCCGGAGGTCGCCTGTCATCTCCGCGCCTCCGCGGG	2	+	chr9:71063748-71063867
ALDH1A2	BA_593036_005842	CTGGATCCCTTCAGAGGCCGGGGGCCCGGAGGTCGCCTGTCATCTCCGCGCCTCCGCGGGGACCGCGATGCGGGCTTCTCAAGTCCCGCCCCGGTTTAGGGAGCGTCTTGGGAGAACCGG	2	+	chr9:71063808-71063927
ALDH1A2	BA_593036_005843	GACCGCGATGCGGGCTTCTCAAGTCCCGCCCCGGTTTAGGGAGCGTCTTGGGAGAACCGGTCCCAAACAGAAGGCAGCGCGGGGATCGCCAGCGGCGGCGGACGGTGGTGACGACCTCGG	2	+	chr9:71063868-71063987
ALDH1A2	BA_593036_005844	TCCCAAACAGAAGGCAGCGCGGGGATCGCCAGCGGCGGCGGACGGTGGTGACGACCTCGGGACTGCCTGGGGAGGTGGGATTTCCCAGAGCAGACCTGGGTCTGGTTCTGGAGTCCCCTA	2	+	chr9:71063928-71064047
ALDH1A2	BA_593036_005845	GACTGCCTGGGGAGGTGGGATTTCCCAGAGCAGACCTGGGTCTGGTTCTGGAGTCCCCTATGACTCTTTAGAGCCGGCTAGGGTCCGGTCCTAGATGTCCCTAGGGCAGAACGAGGCTTA	1	+	chr9:71063988-71064107
ALDH1A2	BA_593036_005846	TGACTCTTTAGAGCCGGCTAGGGTCCGGTCCTAGATGTCCCTAGGGCAGAACGAGGCTTAGTTCTGGGGTCCCTTAGAGCTCAGGGCAGACCGGAGTCCGGTTGTGCGAGCCCCCAAGTT	1	+	chr9:71064048-71064167
ALDH1A2	BA_593036_005847	GTTCTGGGGTCCCTTAGAGCTCAGGGCAGACCGGAGTCCGGTTGTGCGAGCCCCCAAGTTTTATCAGAGCAAATGGAGTTTGGCTCTGGGGTCCCCCAGGTCTCCTCAGAGCAGTCCGGG	1	+	chr9:71064108-71064227
ALDH1A2	BA_593036_005848	TTATCAGAGCAAATGGAGTTTGGCTCTGGGGTCCCCCAGGTCTCCTCAGAGCAGTCCGGGCTCTGGCTTGAGGAGGGTGTTCCCCTGGGTTTCCTCAGAGCCCACCGGGGTGCAGTTCTC	1	+	chr9:71064168-71064287
ALDH1A2	BA_593036_005849	CTCTGGCTTGAGGAGGGTGTTCCCCTGGGTTTCCTCAGAGCCCACCGGGGTGCAGTTCTCCCTGTCCCTCGGTCTCAGAGCAGAGTGGGGTTCACCGCCAGGGTGGCATTGCGGTCCGGT	2	+	chr9:71064228-71064347
ALDH1A2	BA_593036_005850	CCTGTCCCTCGGTCTCAGAGCAGAGTGGGGTTCACCGCCAGGGTGGCATTGCGGTCCGGTGTCGCCCCGCGGTCCCTCGGGTCCGGAGGTGCGCGGCCGCGCGGGCTTATCTTCCCTCAG	2	+	chr9:71064288-71064407
ALDH1A2	BA_593036_005851	GTCGCCCCGCGGTCCCTCGGGTCCGGAGGTGCGCGGCCGCGCGGGCTTATCTTCCCTCAGAGCGGAGTCGCTGAAGGGTTGTCAGGACCGGAGTCCCACAGACTTCGCGGGGACCTGGCC	2	+	chr9:71064348-71064467
ALDH1A2	BA_593036_005852	AGCGGAGTCGCTGAAGGGTTGTCAGGACCGGAGTCCCACAGACTTCGCGGGGACCTGGCCGAGACGCAGTAGGTCTATGCCAGGATTTCCTCGGGATTTTGTAGGCAATGGACATTTTAG	1	+	chr9:71064408-71064527
ALDH1A2	BA_593036_005853	GAGACGCAGTAGGTCTATGCCAGGATTTCCTCGGGATTTTGTAGGCAATGGACATTTTAGAAAAAGGGAAAATAACTCAAGTCACATAAATTAGCGAGCTCACTTTTGCACTGATAAGCC	1	+	chr9:71064468-71064587
ALDH1A2	BA_593036_005854	AAAAAGGGAAAATAACTCAAGTCACATAAATTAGCGAGCTCACTTTTGCACTGATAAGCCTAATGATTTTTTTCCTAACGAATTCTGACATCTTAGTTTGTCAAGCACGAATTATTGTTG	1	+	chr9:71064528-71064647
ALDH1A2	BA_593036_005855	TAATGATTTTTTTCCTAACGAATTCTGACATCTTAGTTTGTCAAGCACGAATTATTGTTGTTAAACTGCATTAAAAAGCAATACACGCCTGCTGCCCCATGTGACTTGATCCCCTACCAC	1	+	chr9:71064588-71064707
ALDH1A2	BA_593036_005856	TTAAACTGCATTAAAAAGCAATACACGCCTGCTGCCCCATGTGACTTGATCCCCTACCACTCCACCGTTCTCAGGGAAAAAAAATCCACGGGGGAAATTTGTGAAATACATACACAAAGG	1	+	chr9:71064648-71064767
ALDH1A2	BA_593036_005857	TCCACCGTTCTCAGGGAAAAAAAATCCACGGGGGAAATTTGTGAAATACATACACAAAGGGATTGAATGTTATAGCAAAAAGGCGACTGTAGCCTTTAAAGCCACACTTCTTGAGAGTTC	1	+	chr9:71064708-71064827
ALDH1A2	BA_593036_005858	GATTGAATGTTATAGCAAAAAGGCGACTGTAGCCTTTAAAGCCACACTTCTTGAGAGTTCATTTTAGAATTTTTTTTTTTAATTTGATTTTCATTCCTACCGCAAACTCTCGCCAGTTAA	1	+	chr9:71064768-71064887
ALDH1A2	BA_593036_005859	ATTTTAGAATTTTTTTTTTTAATTTGATTTTCATTCCTACCGCAAACTCTCGCCAGTTAACTGCAGCGCGCGCACACGATACAGCTGATAAGTGTTCCATCGCGGGCATTACACTATACG	1	+	chr9:71064828-71064947
ALDH1A2	BA_593036_005860	CTGCAGCGCGCGCACACGATACAGCTGATAAGTGTTCCATCGCGGGCATTACACTATACGCGAAAAGCAGAGAAGTTAAGTTGTTCGCATGTGACAACTGTTACGGTTGAAAGAGAAATG	1	+	chr9:71064888-71065007
ALDH1A2	BA_593036_005861	CGAAAAGCAGAGAAGTTAAGTTGTTCGCATGTGACAACTGTTACGGTTGAAAGAGAAATGCAAAAACATCGTTTCTGAATTTTTGTTGCATTGAGTTTCAGAATAAGGATTTGTAGGATT	1	+	chr9:71064948-71065067
ALDH1A2	BA_593036_005862	CAAAAACATCGTTTCTGAATTTTTGTTGCATTGAGTTTCAGAATAAGGATTTGTAGGATTCGTATTTTTGAATGTGGATTTAATGTACCTGTTAGCTTTTAGATGGTGTGACAAATTTTT	1	+	chr9:71065008-71065127
ALDH1A2	BA_593036_005863	CGTATTTTTGAATGTGGATTTAATGTACCTGTTAGCTTTTAGATGGTGTGACAAATTTTTGAAAGCCATTTTAATGAGAGGTCGTTAATGGTTATAGCCCTCTAGGCATTGTTTGCATAA	1	+	chr9:71065068-71065187
ALDH1A2	BA_593036_005864	GAAAGCCATTTTAATGAGAGGTCGTTAATGGTTATAGCCCTCTAGGCATTGTTTGCATAACAATAGTGCCAGTGTGTGGCACATCTCCGGGTTTAGGAACAAGCCAGGGAAGCCTGCACA	1	+	chr9:71065128-71065247
ALDH1A2	BA_593036_005865	CAATAGTGCCAGTGTGTGGCACATCTCCGGGTTTAGGAACAAGCCAGGGAAGCCTGCACATAAAAGTTTTGTTTTATGAGGGTCCCTAACCTCTTCAGATGCGCTTTAGAGATCTTAAAA	1	+	chr9:71065188-71065307
ALDH1A2	BA_593036_005866	TAAAAGTTTTGTTTTATGAGGGTCCCTAACCTCTTCAGATGCGCTTTAGAGATCTTAAAAGGCAAGATCCACACGTGATTCCGGGGGTTTGTTTTACACTTACTTTTGATCAGATTATCT	1	+	chr9:71065248-71065367
ALDH1A2	BA_593036_005867	GGCAAGATCCACACGTGATTCCGGGGGTTTGTTTTACACTTACTTTTGATCAGATTATCTTAACAGCCCCTGAAAGTCTGCAGTAGATATCTTTTTTCAGAATTTCATTTGGAAGCTCCT	1	+	chr9:71065308-71065427
ALDH1A2	BA_593036_005868	TAACAGCCCCTGAAAGTCTGCAGTAGATATCTTTTTTCAGAATTTCATTTGGAAGCTCCTCCAATTCTCCTTTTCTCTAGCCACCCCCTCTCTTCTCTCTCTTGTTCTACCCCAGTAGGA	1	+	chr9:71065368-71065487
ALDH1A2	BA_593036_005869	CCAATTCTCCTTTTCTCTAGCCACCCCCTCTCTTCTCTCTCTTGTTCTACCCCAGTAGGAAAGACAACTGATTTATAGCTAATTGGAGCCTTTAATGTCGGAGTCTTTTTAGCTCCATGA	1	+	chr9:71065428-71065547
ALDH1A2	BA_593036_005870	AAGACAACTGATTTATAGCTAATTGGAGCCTTTAATGTCGGAGTCTTTTTAGCTCCATGAAGACTTTTATCCAGTATCCACTTTCCCACTTATTACCAAGAAAAACAATCAGAAATGAAA	1	+	chr9:71065488-71065607
ALDH1A2	BA_593036_005871	AGACTTTTATCCAGTATCCACTTTCCCACTTATTACCAAGAAAAACAATCAGAAATGAAATAATGGATTGTAACTTGATTCTTTAATTTGTGGGGAGGAGGCGCCTTATATTTTGTCTTG	1	+	chr9:71065548-71065667
ALPL	BA_593036_006844	CATCACTGACATGGCTGCGAACCAGCCCAGACCTGTCTCACTCCACCAGTAGGCTTCTGAGAAGCTGTGTTCTCCCCTAAGGGAACCAGAGACGGTTCAGGAATTGGAAAAGGAGGCAGA	1	+	chr4:137350875-137350994
ALPL	BA_593036_006845	GAAGCTGTGTTCTCCCCTAAGGGAACCAGAGACGGTTCAGGAATTGGAAAAGGAGGCAGAGACAGGAGACGGCCAGGGAGTGGGAGAGGAAAGAGCTGACTGGGGAGACCAGAGAGGCTT	1	+	chr4:137350935-137351054
ALPL	BA_593036_006846	GACAGGAGACGGCCAGGGAGTGGGAGAGGAAAGAGCTGACTGGGGAGACCAGAGAGGCTTGGAGGGTGAAGGGCATACTGGGGGGGGGCTCTCCTTAATCTCCTGGGCTGTGGAGAATGG	1	+	chr4:137350995-137351114
ALPL	BA_593036_006847	GGAGGGTGAAGGGCATACTGGGGGGGGGCTCTCCTTAATCTCCTGGGCTGTGGAGAATGGGCAACAGGGTTCAATGCCTAATGTCATTGCCTACATTGTCTAAAACTCTCTGTCCCTATT	1	+	chr4:137351055-137351174
ALPL	BA_593036_006848	GCAACAGGGTTCAATGCCTAATGTCATTGCCTACATTGTCTAAAACTCTCTGTCCCTATTTGTAGTCTGTCAGGTGTCAGAGCAGTCCTTATCCAGCATTTAATAAACAGTTGCCCTAAT	1	+	chr4:137351115-137351234
ALPL	BA_593036_006849	TGTAGTCTGTCAGGTGTCAGAGCAGTCCTTATCCAGCATTTAATAAACAGTTGCCCTAATTCTCAACCAGACTGAGAATCTGAGGCTGCCTGAGGGGGGGTCTTTGAATTCTTCTTGGAG	1	+	chr4:137351175-137351294
ALPL	BA_593036_006850	TCTCAACCAGACTGAGAATCTGAGGCTGCCTGAGGGGGGGTCTTTGAATTCTTCTTGGAGCCAAACGTTCTTTCAGGCCTGAGAATAATCCCTCTGTTATATGTATGTGTGTGTGTGTGT	1	+	chr4:137351235-137351354
ALPL	BA_593036_006851	AGATCCTCAGCCTCCAGACTGCCAGCATCTCTCCAGAGTTGCCGCGCCAGCTTTCCTTTTTAATCAGGATTCACAGGCATACCCCAGAGTCCTTTGCAAGTCTTCCTTCCTCAGGCCCAT	1	+	chr4:137351450-137351569
ALPL	BA_593036_006852	TAATCAGGATTCACAGGCATACCCCAGAGTCCTTTGCAAGTCTTCCTTCCTCAGGCCCATTACGCGTTGAAAAGGATTACCATGGACAATGTGGGAGTAAGAATGAGGTTTTTTTCCTCC	1	+	chr4:137351510-137351629
ALPL	BA_593036_006853	TACGCGTTGAAAAGGATTACCATGGACAATGTGGGAGTAAGAATGAGGTTTTTTTCCTCCGTCTTGGGTCCTGCCGCTGTGACTGTGCCTTTAACCCTTTCTTACCCGCGCTGGGCAAGG	1	+	chr4:137351570-137351689
ALPL	BA_593036_006854	GTCTTGGGTCCTGCCGCTGTGACTGTGCCTTTAACCCTTTCTTACCCGCGCTGGGCAAGGCAGCAGCCCCACTCTCACCTGCACACAGCCTGGAACCGTTCACAGGCTCCTTCCGTTTCC	1	+	chr4:137351630-137351749
ALPL	BA_593036_006855	CAGCAGCCCCACTCTCACCTGCACACAGCCTGGAACCGTTCACAGGCTCCTTCCGTTTCCTGGGCTCCCCCACTCTCAGACAGACACTAGCACGCGGTCTCCGATCTCTCCCGCCAAAGA	1	+	chr4:137351690-137351809
ALPL	BA_593036_006856	TGGGCTCCCCCACTCTCAGACAGACACTAGCACGCGGTCTCCGATCTCTCCCGCCAAAGATCGCAGCACGTGCCTTCTTCCTGCTGCTCCCCAACTACTTTAGACACCAACGGGACAGAG	1	+	chr4:137351750-137351869
ALPL	BA_593036_006857	TCGCAGCACGTGCCTTCTTCCTGCTGCTCCCCAACTACTTTAGACACCAACGGGACAGAGTGCCAAGGGACCACGAAGGGCGCAGCTGTGGACTACGGAGGCGCGTGGGCACCGGGAGCA	1	+	chr4:137351810-137351929
ALPL	BA_593036_006858	TGCCAAGGGACCACGAAGGGCGCAGCTGTGGACTACGGAGGCGCGTGGGCACCGGGAGCAGGTGCTTAGCACGAGGGTGAGGTCCTGGGTAGCGGCTCAGCGGGCGCCACGTCCATCATC	2	+	chr4:137351870-137351989
ALPL	BA_593036_006859	GGTGCTTAGCACGAGGGTGAGGTCCTGGGTAGCGGCTCAGCGGGCGCCACGTCCATCATCCTGCCAGGCCACAAGAGATGCGCGCGGAGTCCGGAGCGGGAGGTCGTGGGTCCCCAGGGA	2	+	chr4:137351930-137352049
ALPL	BA_593036_006860	CTGCCAGGCCACAAGAGATGCGCGCGGAGTCCGGAGCGGGAGGTCGTGGGTCCCCAGGGAGCCTGACCTTCCACGTGTCCCCACCGTGGCTGGGACAGTCACTGCGGGACCGGCGGAGCG	2	+	chr4:137351990-137352109
ALPL	BA_593036_006861	GCCTGACCTTCCACGTGTCCCCACCGTGGCTGGGACAGTCACTGCGGGACCGGCGGAGCGCGCGCGTGGGAGTCGCGCAAGCCACGGGCGCAGCATGCTTTCCTTACCTGCAGGCACTCG	2	+	chr4:137352050-137352169
ALPL	BA_593036_006862	CGCGCGTGGGAGTCGCGCAAGCCACGGGCGCAGCATGCTTTCCTTACCTGCAGGCACTCGTGGGGAGGGTCTGTTCCGGCTCGCGAGCGGCAGCCCTAAGGAGCGCAGTGGCGGGAGCGT	2	+	chr4:137352110-137352229
ALPL	BA_593036_006863	TGGGGAGGGTCTGTTCCGGCTCGCGAGCGGCAGCCCTAAGGAGCGCAGTGGCGGGAGCGTACTCTGGCGGCCACCTCCCCCGCCTGCTTATGAAGGCGGCCTGGCCGAGCACCCGCCGGC	2	+	chr4:137352170-137352289
ALPL	BA_593036_006864	CCCCCGGCCCGCACCCCGAGCCCCAGGCGGGTGCCTCTGCGTTGCCAGGGCGCCCCCTGCCGGGAGCGCGGCGCTCGACCCGGCCCGTAGGGCTGCAACAGGCAGGGTAACCCGCCTTGC	2	+	chr4:137352312-137352431
ALPL	BA_593036_006865	CGGGAGCGCGGCGCTCGACCCGGCCCGTAGGGCTGCAACAGGCAGGGTAACCCGCCTTGCCTCTCTCTTTCCCTGCGGCTCATCCTGGCTTCAGGGTGCAGCTGGCTTGTCTTTAGGTTT	2	+	chr4:137352372-137352491
ALPL	BA_593036_006866	CTCTCTCTTTCCCTGCGGCTCATCCTGGCTTCAGGGTGCAGCTGGCTTGTCTTTAGGTTTGATTTCTCTGTAGGAGACTTTGTCCCTCGATGGTTGTCTTCCTGTGCCTGACCCTGCGCG	1	+	chr4:137352432-137352551
ALPL	BA_593036_006867	GATTTCTCTGTAGGAGACTTTGTCCCTCGATGGTTGTCTTCCTGTGCCTGACCCTGCGCGTCTGTGAACCCACCTGGCTCCTTTTTTCTGTGCGTCTTTCTGCCTACACATCCTTGTCCG	1	+	chr4:137352492-137352611
ALPL	BA_593036_006868	TCTGTGAACCCACCTGGCTCCTTTTTTCTGTGCGTCTTTCTGCCTACACATCCTTGTCCGTCACCATGTGCACCTCTGAGCCTCACACCCTTACCCCTTTCCTATCCACTTTCTCTTTTG	1	+	chr4:137352552-137352671
ALPL	BA_593036_006869	TCACCATGTGCACCTCTGAGCCTCACACCCTTACCCCTTTCCTATCCACTTTCTCTTTTGCCCTTAACTAAGTCAGTAGGAAGCAGAAGGAGACCCCTTGGACAGGGCCCTCCCTCCCTA	1	+	chr4:137352612-137352731
ALPL	BA_593036_006870	CCCTTAACTAAGTCAGTAGGAAGCAGAAGGAGACCCCTTGGACAGGGCCCTCCCTCCCTAATATCTGAAGAAACAGGGACTCAGGACATTCTGTCTGTCCCAGCCAGAAGCCCCAGGACC	1	+	chr4:137352672-137352791
ALPL	BA_593036_006871	ATATCTGAAGAAACAGGGACTCAGGACATTCTGTCTGTCCCAGCCAGAAGCCCCAGGACCTGCCCGGGGCAGACCACTTCCCAGGCAGTGGAGCCAGACTGTCTAGGCCCACAGGCCTGC	1	+	chr4:137352732-137352851
ALPL	BA_593036_006872	TGCCCGGGGCAGACCACTTCCCAGGCAGTGGAGCCAGACTGTCTAGGCCCACAGGCCTGCTCTGGTGACTTCGGGGGACTGGCCAAGGCTCTATAACCCGCAGACACTATCCCCTGGTTT	1	+	chr4:137352792-137352911
ALPL	BA_593036_006873	TCTGGTGACTTCGGGGGACTGGCCAAGGCTCTATAACCCGCAGACACTATCCCCTGGTTTTTCTTCCTTCACGTTATTGGGAGAGTTATAAGAGACCGAGTTTGGAACATGCACAGGAAA	1	+	chr4:137352852-137352971
ALPL	BA_593036_006874	TTCTTCCTTCACGTTATTGGGAGAGTTATAAGAGACCGAGTTTGGAACATGCACAGGAAACAAGGAAAGGCAACCGCTGGGTGCCAGTGGGCCTTATCCAGTTCCCCAAGGGCCACCACC	1	+	chr4:137352912-137353031
ALPL	BA_593036_006875	CAAGGAAAGGCAACCGCTGGGTGCCAGTGGGCCTTATCCAGTTCCCCAAGGGCCACCACCTCCCTTCCCCTGAAAGCCAGTCTGGTTTTGAAGTCTCTGATTCGTTTCCTACTGTGAACT	1	+	chr4:137352972-137353091
ALPL	BA_593036_006876	TCCCTTCCCCTGAAAGCCAGTCTGGTTTTGAAGTCTCTGATTCGTTTCCTACTGTGAACTCCTGGAGGTAGGTTTGAATGCCACCACCATTTGAATACTTCCTCATTTCCTCCTAAGAGG	1	+	chr4:137353032-137353151
ALPL	BA_593036_006877	CCTGGAGGTAGGTTTGAATGCCACCACCATTTGAATACTTCCTCATTTCCTCCTAAGAGGAGGGTCTTATCATCGCTACTGAAGCTGACAAAACCCATCTGTACCTCTAATCCCCAACAG	1	+	chr4:137353092-137353211
ALPL	BA_593036_006878	AGGGTCTTATCATCGCTACTGAAGCTGACAAAACCCATCTGTACCTCTAATCCCCAACAGCCAGAGATTTGAAAGCAAAGATCAGGTTTCCCTGAACTCCATCTTCCTGGGCACCTAGGA	1	+	chr4:137353152-137353271
ALPL	BA_593036_006879	CCAGAGATTTGAAAGCAAAGATCAGGTTTCCCTGAACTCCATCTTCCTGGGCACCTAGGATTGATCACTTCTACCCTGAAGTTCCGTCTTAGGTCCAGGCATCTTCTATATGAGCTCTAC	1	+	chr4:137353212-137353331
ALPL	BA_593036_006880	TTGATCACTTCTACCCTGAAGTTCCGTCTTAGGTCCAGGCATCTTCTATATGAGCTCTACTATTGAGCCCATTTTACAGGAGGAAAAGCAAGGCCCAGAGACAACATGTGACCTCATCGG	1	+	chr4:137353272-137353391
ALPL	BA_593036_006881	TATTGAGCCCATTTTACAGGAGGAAAAGCAAGGCCCAGAGACAACATGTGACCTCATCGGTAAGTTCAGGGCCGGAACTGGAGCCTGATGCCAAAACCCAGGAATGCCTGGGTTTGTTTT	1	+	chr4:137353332-137353451
ALPL	BA_593036_006882	TAAGTTCAGGGCCGGAACTGGAGCCTGATGCCAAAACCCAGGAATGCCTGGGTTTGTTTTCATTTGTTCTTGTATTTTAATAATTAATGCTGTTTATTTACAGCGGTGCTAGGAAATTTC	1	+	chr4:137353392-137353511
ALPL	BA_593036_006883	CATTTGTTCTTGTATTTTAATAATTAATGCTGTTTATTTACAGCGGTGCTAGGAAATTTCCCTTGAGAAATAAGTTTATGTTTTTACAAAGTGAGACCAAGTATTGGGTAAATTACTCCT	1	+	chr4:137353452-137353571
ALPL	BA_593036_006884	CCTTGAGAAATAAGTTTATGTTTTTACAAAGTGAGACCAAGTATTGGGTAAATTACTCCTTATTTATGTATTTCATAGCAAGGTCATAATGGCAAAAGCCATTGGGGCGGTGAATAAATG	1	+	chr4:137353512-137353631
ALPL	BA_593036_006885	TATTTATGTATTTCATAGCAAGGTCATAATGGCAAAAGCCATTGGGGCGGTGAATAAATGAAACTTTGGTCATTTCCCGGCAGTCCTCGTCTGTAAGGAGCTGAGAGTTAAGACAGCAGT	1	+	chr4:137353572-137353691
ALPL	BA_593036_006886	AAACTTTGGTCATTTCCCGGCAGTCCTCGTCTGTAAGGAGCTGAGAGTTAAGACAGCAGTGAGCTCAGAACACAGCACTTGGCAATTACTTGCTAGCTAGCGCCAAAGGGCTCAAGATGA	1	+	chr4:137353632-137353751
ALPL	BA_593036_006887	GAGCTCAGAACACAGCACTTGGCAATTACTTGCTAGCTAGCGCCAAAGGGCTCAAGATGACAAAAGGCTGGAGATTGTATCTGTGTGCCGAGGGACATCCGCATCATAAATGATCCCCCT	1	+	chr4:137353692-137353811
ALX1	BA_593036_000455	TCGGTGTGAAGGGGCTGTCCTTCCACTTTGGTGATTCCATAGTTCACTGTACTCGGGAAGGAAAACAGCGATACTCAGGGTGGTGAAACATACTTTGATGAAGCAATTAGTGTGAAATAA	1	+	chr10:102488028-102488147
ALX1	BA_593036_000456	GAAAACAGCGATACTCAGGGTGGTGAAACATACTTTGATGAAGCAATTAGTGTGAAATAATTTAGAGCATCAGAAAATAATAACAGCTAATGATTTATTTTGCCAGTATTAATTCTATCA	1	+	chr10:102488088-102488207
ALX1	BA_593036_000457	TTTAGAGCATCAGAAAATAATAACAGCTAATGATTTATTTTGCCAGTATTAATTCTATCATCACATGATGTGCAATGCATTATTAATTCACTGTGGATCGGATTTAAAAAGAGTTCTAAA	1	+	chr10:102488148-102488267
ALX1	BA_593036_000458	TCACATGATGTGCAATGCATTATTAATTCACTGTGGATCGGATTTAAAAAGAGTTCTAAACGTGTACGTGAACTCAGGACTTGTCAAAGTCCACAGATCTATTTTATATGGCTAATGTAC	1	+	chr10:102488208-102488327
ALX1	BA_593036_000459	CGTGTACGTGAACTCAGGACTTGTCAAAGTCCACAGATCTATTTTATATGGCTAATGTACTGTTTATGCATATAGTTTATAATCAAATTAAAATAGTCAAGGGAAAATTTGCTCCAGACT	1	+	chr10:102488268-102488387
ALX1	BA_593036_000460	TGTTTATGCATATAGTTTATAATCAAATTAAAATAGTCAAGGGAAAATTTGCTCCAGACTTAAAAAAAATCTAAACAGCCATGACTTTTTAAATATGGATGTACAAAACTTATAGCATAT	1	+	chr10:102488328-102488447
ALX1	BA_593036_000461	TAAAAAAAATCTAAACAGCCATGACTTTTTAAATATGGATGTACAAAACTTATAGCATATACATCTTTTTACATATGACAAAATTAAAGTCCTTCTGGTCTTCAGAAAAAATTTACTTCA	1	+	chr10:102488388-102488507
ALX1	BA_593036_000462	ACATCTTTTTACATATGACAAAATTAAAGTCCTTCTGGTCTTCAGAAAAAATTTACTTCAAATTTAAATAGTATCTCTCTCCCAGTACCACCCACATCTTACAAAACAAAGCTGTGCAGA	1	+	chr10:102488448-102488567
ALX1	BA_593036_000463	AATTTAAATAGTATCTCTCTCCCAGTACCACCCACATCTTACAAAACAAAGCTGTGCAGAGACTGCAATGAGGTATGAATCCATTACATTGTACACATTCTAGTTCAATGAGTTAGTCGT	1	+	chr10:102488508-102488627
ALX1	BA_593036_000464	GACTGCAATGAGGTATGAATCCATTACATTGTACACATTCTAGTTCAATGAGTTAGTCGTGACTGAATTTAAGTTTTCTTCAGAAAGAGATCTACTATTTTTTTAATCCTTATCAAGTTC	1	+	chr10:102488568-102488687
ALX1	BA_593036_000465	GACTGAATTTAAGTTTTCTTCAGAAAGAGATCTACTATTTTTTTAATCCTTATCAAGTTCTGAAAGTACCTTTTACTAGAAAAGTATAAGATTTAAATACATTTCTTTACATTAAAAACG	1	+	chr10:102488628-102488747
ALX1	BA_593036_000466	TGAAAGTACCTTTTACTAGAAAAGTATAAGATTTAAATACATTTCTTTACATTAAAAACGACTTCCATTCCTTGAAGACTTTATACTTCCGTTTAACTAGTGCATAGTTAGGACAATATA	1	+	chr10:102488688-102488807
ALX1	BA_593036_000467	TATATATATTGTTTACTCTAGGTACGCTTAGAAATGAAAAGCACAAAAATACAAAAATAAACAAGATAAAATTTAAAACAACAGTTTGCATTCTGTCAAGAGTTATGTCAATTTTAATAA	1	+	chr10:102488848-102488967
ALX1	BA_593036_000468	ACAAGATAAAATTTAAAACAACAGTTTGCATTCTGTCAAGAGTTATGTCAATTTTAATAATTTACTTGAGATCGGAGTTCAAGCTTGCAGCATGACAGGAAACATATATTGCATCATAAA	1	+	chr10:102488908-102489027
ALX1	BA_593036_000469	TTTACTTGAGATCGGAGTTCAAGCTTGCAGCATGACAGGAAACATATATTGCATCATAAAAATTTACAGACAGATACAACGAACATAAGGAAATAGTGCAGTTTGGGCTTGTGTTGTTGT	1	+	chr10:102488968-102489087
ALX1	BA_593036_000470	TTGTTGTTGTCGTTGTTTTGTAAGAAAAACAAAGTTAACCCAACCAGAAGAGTGATTTCCCAGGACTCATCTATTCTTATTTGCTTCTTTAAAAGAGGGTGGGGGGTGGTGGGGGGGAGG	1	+	chr10:102489087-102489206
ALX1	BA_593036_000471	CAGGACTCATCTATTCTTATTTGCTTCTTTAAAAGAGGGTGGGGGGTGGTGGGGGGGAGGGGGATTCCTCTTAACTGTTTGAAGAACCTTTTTATGTGTTCCACGAATACATTGAATTTT	1	+	chr10:102489147-102489266
ALX1	BA_593036_000472	GGGATTCCTCTTAACTGTTTGAAGAACCTTTTTATGTGTTCCACGAATACATTGAATTTTATTGTCTACATAACATATATTGCACATCGATTTTATGCAAAGGAGGATGTGCTGTAAAAA	1	+	chr10:102489207-102489326
ALX1	BA_593036_000473	ATTGTCTACATAACATATATTGCACATCGATTTTATGCAAAGGAGGATGTGCTGTAAAAATAAATATGAAGACAGCTATGACTGATCAACAATAAGGTTTTGTCTTCGCAGACAAGAGTT	1	+	chr10:102489267-102489386
ALX1	BA_593036_000474	TAAATATGAAGACAGCTATGACTGATCAACAATAAGGTTTTGTCTTCGCAGACAAGAGTTAAAACCCGGGAACTGCGGCAATTAGAGGGGGGAGGGGAAGCCGCAAAGACGCTGGGGGCA	1	+	chr10:102489327-102489446
ALX1	BA_593036_000475	AAAACCCGGGAACTGCGGCAATTAGAGGGGGGAGGGGAAGCCGCAAAGACGCTGGGGGCAGGACTGGAGAAAGACCGCTTTTTCTTCAACGTAGCCGATAACCATCCTTGTTCATTTTAT	1	+	chr10:102489387-102489506
ALX1	BA_593036_000476	GGACTGGAGAAAGACCGCTTTTTCTTCAACGTAGCCGATAACCATCCTTGTTCATTTTATTCCATATTTTCCAGTTAAAAATTCTTCCCAACAGGGTGATGAACATTTAAAAGTAAATGA	1	+	chr10:102489447-102489566
ALX1	BA_593036_000477	TCCATATTTTCCAGTTAAAAATTCTTCCCAACAGGGTGATGAACATTTAAAAGTAAATGAAGCACTCCAAACCAATCACCATTCCTCTTTTCCTTTTCCCCGACAATTTAAAGCACGGTG	1	+	chr10:102489507-102489626
ALX1	BA_593036_000478	AGCACTCCAAACCAATCACCATTCCTCTTTTCCTTTTCCCCGACAATTTAAAGCACGGTGGGGTTTCTCTAGCAGTTAACGCAGGCCACTACAAAACCATTTGTAAAAATCCTGTCAGTT	1	+	chr10:102489567-102489686
ALX1	BA_593036_000479	GGGTTTCTCTAGCAGTTAACGCAGGCCACTACAAAACCATTTGTAAAAATCCTGTCAGTTCAAATAACTTCAGGCACGCATCTAAGAGAGCCGAAAACACTTAACACCACCGAAATGAAG	1	+	chr10:102489627-102489746
ALX1	BA_593036_000480	CAAATAACTTCAGGCACGCATCTAAGAGAGCCGAAAACACTTAACACCACCGAAATGAAGCCAGGAAGCCAAAAAGTTCTTGTATGTAATATTGGTTGTTCCAGTCTTTCCAAATAAACG	1	+	chr10:102489687-102489806
ALX1	BA_593036_000481	CCAGGAAGCCAAAAAGTTCTTGTATGTAATATTGGTTGTTCCAGTCTTTCCAAATAAACGATTGAAATCCACTAAAAAAAAAACACGGGCATTTATTATGTGCATTTTTTGTTCTAACCG	1	+	chr10:102489747-102489866
ALX1	BA_593036_000482	ATTGAAATCCACTAAAAAAAAAACACGGGCATTTATTATGTGCATTTTTTGTTCTAACCGGCCAAGTCAAAAGTCGCCCTCTGCACTGAATAAAACGAGTAGAATGTGAGATTCGTTTAA	1	+	chr10:102489807-102489926
ALX1	BA_593036_000483	GCCAAGTCAAAAGTCGCCCTCTGCACTGAATAAAACGAGTAGAATGTGAGATTCGTTTAAAATCTGTATAGAGTGTTGTGCGAATCAGCTCCCGAAAGTGAAAAGGTCTTGCCAGATTTT	1	+	chr10:102489867-102489986
ALX1	BA_593036_000484	AATCTGTATAGAGTGTTGTGCGAATCAGCTCCCGAAAGTGAAAAGGTCTTGCCAGATTTTTGAACCTCCATTAAAATAGGGGGCGGTGGCTTGTTGTAAATATTTCACACTTAATTCGTT	1	+	chr10:102489927-102490046
ALX1	BA_593036_000485	TGAACCTCCATTAAAATAGGGGGCGGTGGCTTGTTGTAAATATTTCACACTTAATTCGTTTGTTGTTTTAAAGCGCCCCGCTTCTTTCCTTGCCATTTAAGGGCGGCGTATACACCATGA	1	+	chr10:102489987-102490106
ALX1	BA_593036_000486	TGTTGTTTTAAAGCGCCCCGCTTCTTTCCTTGCCATTTAAGGGCGGCGTATACACCATGATAAGGAAAAGTCCTCTTAGAATCATAAACCTGTTTTAACTGTCGGGATGTGAAATGATAG	1	+	chr10:102490047-102490166
ALX1	BA_593036_000487	TAAGGAAAAGTCCTCTTAGAATCATAAACCTGTTTTAACTGTCGGGATGTGAAATGATAGGGATTGCACTGGGCTACAAGATAGAAAAAGATAGATGGTTTGTTTTGATAACATTTTGAC	1	+	chr10:102490107-102490226
ALX1	BA_593036_000488	GGATTGCACTGGGCTACAAGATAGAAAAAGATAGATGGTTTGTTTTGATAACATTTTGACTTGGAGATAGTCTGGCATTCAGAGTTGAAGATTCTGTCCAGAAACACTCCGAAAGGCTCC	1	+	chr10:102490167-102490286
ALX1	BA_593036_000489	TTGGAGATAGTCTGGCATTCAGAGTTGAAGATTCTGTCCAGAAACACTCCGAAAGGCTCCTTAGGTGACATTTTATGTGGAAGAAGAAAAACAGACAATGCAGAATCCCCAAGTGAGTGG	1	+	chr10:102490227-102490346
ALX1	BA_593036_000490	TTAGGTGACATTTTATGTGGAAGAAGAAAAACAGACAATGCAGAATCCCCAAGTGAGTGGTTTTTATCCGGAATGCTTTGCCCAAAAGCTAAAATGATTAGGTTTTTTACCAAAATGTAT	1	+	chr10:102490287-102490406
ALX1	BA_593036_000491	TTTTTATCCGGAATGCTTTGCCCAAAAGCTAAAATGATTAGGTTTTTTACCAAAATGTATGTTTGCTCATCACAAACGCAATAAAGAAGTAAAGAAAATCGGCAGAAACTTAAGTTCACA	1	+	chr10:102490347-102490466
ALX1	BA_593036_000492	GTTTGCTCATCACAAACGCAATAAAGAAGTAAAGAAAATCGGCAGAAACTTAAGTTCACACAAGCTAATATATATATAGCAACAGAGAAATACAATAAAAATGTCGTCACTCCTAGGACA	1	+	chr10:102490407-102490526
ALX1	BA_593036_000493	CAAGCTAATATATATATAGCAACAGAGAAATACAATAAAAATGTCGTCACTCCTAGGACATTAAAAACGGTTTCGTAGCTTCCCACTCATGCACACATAAAAGAGCTCAAAGATTTTGGT	1	+	chr10:102490467-102490586
ALX1	BA_593036_000494	TTAAAAACGGTTTCGTAGCTTCCCACTCATGCACACATAAAAGAGCTCAAAGATTTTGGTTTTCCTGACCACTATGACATCTAGTGATGGATTTCACATCCCCGAGCCCCGGCATCCTGG	1	+	chr10:102490527-102490646
ALX1	BA_593036_000495	TTTCCTGACCACTATGACATCTAGTGATGGATTTCACATCCCCGAGCCCCGGCATCCTGGAGGGTTCACAGCGGTGGTGCGGTATTTTAACTCAATTATGACTTATTTGGAGTCCTGTTA	1	+	chr10:102490587-102490706
ALX1	BA_593036_000496	AGGGTTCACAGCGGTGGTGCGGTATTTTAACTCAATTATGACTTATTTGGAGTCCTGTTAACCTACACTGTGATCCTGGTCAGATCCTTCTTGTCCAGTTGTGAACTCTATCCGAAAGTG	1	+	chr10:102490647-102490766
ALX1	BA_593036_000497	ACCTACACTGTGATCCTGGTCAGATCCTTCTTGTCCAGTTGTGAACTCTATCCGAAAGTGAAATAGAATCCGGCAGGATTTAGCTCTGGACCCCGGCCGGTTGCGGGAGTCCCAGAGTGC	1	+	chr10:102490707-102490826
ALX1	BA_593036_000498	AAATAGAATCCGGCAGGATTTAGCTCTGGACCCCGGCCGGTTGCGGGAGTCCCAGAGTGCGCGGCGCCCGGTCCCCAGCAATCTGGATTCCTCTTGCCACATTTCTTTACTTCGACCCGC	1	+	chr10:102490767-102490886
ALX1	BA_593036_000499	GCGGCGCCCGGTCCCCAGCAATCTGGATTCCTCTTGCCACATTTCTTTACTTCGACCCGCACCGTACCTCACTTCGGGGAAGGATGGCTGAGACTGGGGCTCAGTTTGGAGCCCTGGTCA	1	+	chr10:102490827-102490946
ALX1	BA_593036_000500	ACCGTACCTCACTTCGGGGAAGGATGGCTGAGACTGGGGCTCAGTTTGGAGCCCTGGTCAGGCCGCTAGGGAGTAGGGATTAGGATGGGGTTGGGGGCTGGAGGTCAGCCGGGGTGCTGG	1	+	chr10:102490887-102491006
ALX1	BA_593036_000501	GGCCGCTAGGGAGTAGGGATTAGGATGGGGTTGGGGGCTGGAGGTCAGCCGGGGTGCTGGTGACTTACCGCTGCTGTCCTGACAGGGCGAAGTCCTGTCCAGGCGCACGTGATGCTCCGC	2	+	chr10:102490947-102491066
ALX1	BA_593036_000502	TGACTTACCGCTGCTGTCCTGACAGGGCGAAGTCCTGTCCAGGCGCACGTGATGCTCCGCTCGCGGCAGCGGCCCGAAGGCCTGCACGCATTTGCCAGCCGTCGCTTTGCCGTAAAAGGA	1	+	chr10:102491007-102491126
ALX1	BA_593036_000503	TCGCGGCAGCGGCCCGAAGGCCTGCACGCATTTGCCAGCCGTCGCTTTGCCGTAAAAGGACTCATTGTCCAGCGTCTCCATAACGTGCTCCAACGCGCCTCCTGTGCCCATGTAAAAGTC	1	+	chr10:102491067-102491186
ALX1	BA_593036_000504	CTCATTGTCCAGCGTCTCCATAACGTGCTCCAACGCGCCTCCTGTGCCCATGTAAAAGTCACTGTTTTTACTTGGCGGGCTCTTCAGGGCAAACTTCTCGCTCAGAAACTCCATAATCCT	1	+	chr10:102491127-102491246
ALX1	BA_593036_000505	ACTGTTTTTACTTGGCGGGCTCTTCAGGGCAAACTTCTCGCTCAGAAACTCCATAATCCTGGAAAGGCTGTCCGCGAGCTCTCCGGGGCGTGCGGAGGCTGGAGGGCGCGGAGGGAGGAG	1	+	chr10:102491187-102491306
ALX1	BA_593036_000506	GGAAAGGCTGTCCGCGAGCTCTCCGGGGCGTGCGGAGGCTGGAGGGCGCGGAGGGAGGAGGGAGCAGTGGGCGGGAGTAGGGAGGGTCAGAGAGGAGGGAAAGGGGAAGCGAGACCTGCG	2	+	chr10:102491247-102491366
ALX1	BA_593036_000507	GGAGCAGTGGGCGGGAGTAGGGAGGGTCAGAGAGGAGGGAAAGGGGAAGCGAGACCTGCGACGCCAGGAGCTGCCCAGCTCCCAGACTCTTAATACGTCCCGGCTGCAGAAGGGGCACCC	2	+	chr10:102491307-102491426
ALX1	BA_593036_000508	ACGCCAGGAGCTGCCCAGCTCCCAGACTCTTAATACGTCCCGGCTGCAGAAGGGGCACCCGAAGTTGCTTTTATATCTTGAAACTCAGCTGGGCTCCTCCGGCAACCTCCCAGTCCTAAT	1	+	chr10:102491367-102491486
ALX1	BA_593036_000509	GAAGTTGCTTTTATATCTTGAAACTCAGCTGGGCTCCTCCGGCAACCTCCCAGTCCTAATGAATATGAAAATAGGCAAGGACTAACTCCACCCCAGGCCCCCTCCTCCCCCACCCCACCC	1	+	chr10:102491427-102491546
ALX3	BA_593036_007406	AGTGTTTAATCCAAGCTGCCTTGTTTAATTTGTTGATGGCATTGGTCTTGTGTCATACTTTCATCCTCCAAATTAAGCTGCTTGGTAACTTTGTTGATTAGATGCCCTGAAATGATACAA	1	+	chr3:107396347-107396466
ALX3	BA_593036_007407	TCATCCTCCAAATTAAGCTGCTTGGTAACTTTGTTGATTAGATGCCCTGAAATGATACAACCTTCTAGACAGTCAACACTACCTCATTGACAATTATGGAAAACCTTTTATTAATAATCA	1	+	chr3:107396407-107396526
ALX3	BA_593036_007408	CCTTCTAGACAGTCAACACTACCTCATTGACAATTATGGAAAACCTTTTATTAATAATCAGTTCAGCAGTGTCCACAGCTGAGAGCCAGTGGACTCCCCTCTGGTAGAGGCAGAGGGGAA	1	+	chr3:107396467-107396586
ALX3	BA_593036_007409	GTTCAGCAGTGTCCACAGCTGAGAGCCAGTGGACTCCCCTCTGGTAGAGGCAGAGGGGAAAACCTCATTTTAAGCCAGGCTTCTCTAGCTGGAAATATCAGCCCCAGGTGCTCCCATCTC	1	+	chr3:107396527-107396646
ALX3	BA_593036_007410	AACCTCATTTTAAGCCAGGCTTCTCTAGCTGGAAATATCAGCCCCAGGTGCTCCCATCTCTGCCTAGCCTGCAGTCTGTGATTAGGGGCCCTAATGGCCATAATGCCTCCAATGTGGTGT	1	+	chr3:107396587-107396706
ALX3	BA_593036_007411	TGCCTAGCCTGCAGTCTGTGATTAGGGGCCCTAATGGCCATAATGCCTCCAATGTGGTGTTTAAGCCAATAAGGCTTCAGAAAAGTTACGGTATGTTTAATAATGGCTTAATGACTCCTT	1	+	chr3:107396647-107396766
ALX3	BA_593036_007412	TTAAGCCAATAAGGCTTCAGAAAAGTTACGGTATGTTTAATAATGGCTTAATGACTCCTTGTGAGATGCAAGGCTTCTGGTTCCTGTTTGGCCTTGATTTACAGCCCAACTCTGGCTGAG	1	+	chr3:107396707-107396826
ALX3	BA_593036_007413	GTGAGATGCAAGGCTTCTGGTTCCTGTTTGGCCTTGATTTACAGCCCAACTCTGGCTGAGGACAGCCAAGAAACCTCCTCTAAGCCTCCAACGGAAGAGGGAGGTGTTCACACCAGGCCT	1	+	chr3:107396767-107396886
ALX3	BA_593036_007414	GACAGCCAAGAAACCTCCTCTAAGCCTCCAACGGAAGAGGGAGGTGTTCACACCAGGCCTCTTAGATTCCTTTTAAAAATGAGAATTCAAATAGAATACAAATGATGTTTGACTCCCTGC	1	+	chr3:107396827-107396946
ALX3	BA_593036_007415	CTTAGATTCCTTTTAAAAATGAGAATTCAAATAGAATACAAATGATGTTTGACTCCCTGCCCCTCTCGCTAATCTCCAGGGGTCCTAAAAATATAAATGTTTTAACCCGGACCTAAGGGA	1	+	chr3:107396887-107397006
ALX3	BA_593036_007416	CCCTCTCGCTAATCTCCAGGGGTCCTAAAAATATAAATGTTTTAACCCGGACCTAAGGGATCTTTAAGCTCGGGTCCAAAGGACCTCTGGTATTTCTTCCCAGATCTTAGGCACAGTAAG	1	+	chr3:107396947-107397066
ALX3	BA_593036_007417	TCTTTAAGCTCGGGTCCAAAGGACCTCTGGTATTTCTTCCCAGATCTTAGGCACAGTAAGGATTATTCAGTTTCAGAAAGGCTAAGCTATACCCTAATCCTAGGCTTCCTTTGGGTCGAG	1	+	chr3:107397007-107397126
ALX3	BA_593036_007418	GATTATTCAGTTTCAGAAAGGCTAAGCTATACCCTAATCCTAGGCTTCCTTTGGGTCGAGGAGACTCACCTTTGGGAGATGCAATCCTACCCTCGCTATGTCTAAAATAGCAAGCCTGAA	1	+	chr3:107397067-107397186
ALX3	BA_593036_007419	GAGACTCACCTTTGGGAGATGCAATCCTACCCTCGCTATGTCTAAAATAGCAAGCCTGAAGCAGTTAATTTGCAGTGGATCTGAGTGACATTCAGTTTATGCTGCTCAGAAGGACAATGA	1	+	chr3:107397127-107397246
ALX3	BA_593036_007420	GCAGTTAATTTGCAGTGGATCTGAGTGACATTCAGTTTATGCTGCTCAGAAGGACAATGACCCTTCTGCTCTTCCATAGCTGACCCAAAAAGCTACCTGGGCAGACCACTGTGAAACCTA	1	+	chr3:107397187-107397306
ALX3	BA_593036_007421	CCCTTCTGCTCTTCCATAGCTGACCCAAAAAGCTACCTGGGCAGACCACTGTGAAACCTAGAGATCTCTCTGTCTGTTTTGGCCTGCCTGGGCTTTGGAACTCACCACCAAATGTAGATG	1	+	chr3:107397247-107397366
ALX3	BA_593036_007422	GAGATCTCTCTGTCTGTTTTGGCCTGCCTGGGCTTTGGAACTCACCACCAAATGTAGATGGACCACAGTCAGCTGAAAACGCTAAGTGAGAGGTTCAAATCACAGATAATCAATGACAGT	1	+	chr3:107397307-107397426
ALX3	BA_593036_007423	GACCACAGTCAGCTGAAAACGCTAAGTGAGAGGTTCAAATCACAGATAATCAATGACAGTATTGAGGCCCAAGCTCCCAAGCCCCCTGCTGTTTCCACAGCATCCAGTCTCTAGGATGTC	1	+	chr3:107397367-107397486
ALX3	BA_593036_007424	ATTGAGGCCCAAGCTCCCAAGCCCCCTGCTGTTTCCACAGCATCCAGTCTCTAGGATGTCCAGGCAAAACAAGTGTCTAAGGGAGATGCCCTTGCTTTTTTCCAGCTACCAGCAAAAATA	1	+	chr3:107397427-107397546
ALX3	BA_593036_007425	CAGGCAAAACAAGTGTCTAAGGGAGATGCCCTTGCTTTTTTCCAGCTACCAGCAAAAATAAACCGAGCAAGGTGAAGGGGAAACTCTACCACAGTAGAGGCCTCTCTTCTCAGACTGATG	1	+	chr3:107397487-107397606
ALX3	BA_593036_007426	AACCGAGCAAGGTGAAGGGGAAACTCTACCACAGTAGAGGCCTCTCTTCTCAGACTGATGTCAGATCAGGCCTCAAAGAGAATGTTGGAGGAGGGATGGGGGAGGGTGCGGGGGTGGGGA	1	+	chr3:107397547-107397666
ALX3	BA_593036_007427	TCAGATCAGGCCTCAAAGAGAATGTTGGAGGAGGGATGGGGGAGGGTGCGGGGGTGGGGAGGATGTCTGCCCTCACCGTTTCACCTCCCCAGGGCCAAGAGCCACTAAGATGGATATCAG	1	+	chr3:107397607-107397726
ALX3	BA_593036_007428	GGATGTCTGCCCTCACCGTTTCACCTCCCCAGGGCCAAGAGCCACTAAGATGGATATCAGGACTTGAGGGTGCAGCTCAGAGCCAAGGACTCACCCGACTGCTAGACAAAAGGGATCCTG	1	+	chr3:107397667-107397786
ALX3	BA_593036_007429	GACTTGAGGGTGCAGCTCAGAGCCAAGGACTCACCCGACTGCTAGACAAAAGGGATCCTGCCCTCGAAAGGAAGCAGCTTCCCTCTCTTCTCTTCCAACTGCTTGTGATACCAGACTCGG	1	+	chr3:107397727-107397846
ALX3	BA_593036_007430	CCCTCGAAAGGAAGCAGCTTCCCTCTCTTCTCTTCCAACTGCTTGTGATACCAGACTCGGGGTGAATGGGGTGGGGTGGGGGTGTTCCTGGGCTCCGAGGGGTTAACCCGCACGGGGCCG	1	+	chr3:107397787-107397906
ALX3	BA_593036_007431	GGTGAATGGGGTGGGGTGGGGGTGTTCCTGGGCTCCGAGGGGTTAACCCGCACGGGGCCGCACGTGACGTGGATGGTTCCAGCATTAAGTCAGAGGCGCGGCCCCCTCTCCTGCCCCCCA	2	+	chr3:107397847-107397966
ALX3	BA_593036_007432	CGGGGGCTCCGCGCCCCCGAGCCCAGGTCCCTCCCCCTTGGCTCACAGGCCGCGCGGGTTAGCGGGAGCCCCGGAGCTCCGGCGGCCTGTGAGCCCGAGCCGGCATGGACCCCGAGCGCT	2	+	chr3:107397990-107398109
ALX3	BA_593036_007433	AGCGGGAGCCCCGGAGCTCCGGCGGCCTGTGAGCCCGAGCCGGCATGGACCCCGAGCGCTGCGCGCCTTTCTCCGTGGGGCCGGCGGCCGGTCCTTACGCGGCCGCGGGGGACGAGGCTC	2	+	chr3:107398050-107398169
ALX3	BA_593036_007434	GCGCGCCTTTCTCCGTGGGGCCGGCGGCCGGTCCTTACGCGGCCGCGGGGGACGAGGCTCCGGGTCCCCAGGGGACTCCCGATGCTGCGCCTCACCTGCACCCCGCGCCACCCCGCGGTC	2	+	chr3:107398110-107398229
ALX3	BA_593036_007435	CGGGTCCCCAGGGGACTCCCGATGCTGCGCCTCACCTGCACCCCGCGCCACCCCGCGGTCCGCGCCTGAGCCGCTTCCCGGCCTGTGGGCCCCTGGAACCCTACCTCCCAGAGCCCGCCA	2	+	chr3:107398170-107398289
ALX3	BA_593036_007436	CGCGCCTGAGCCGCTTCCCGGCCTGTGGGCCCCTGGAACCCTACCTCCCAGAGCCCGCCAAGCCGCCCGCCAAGTACCTGCAGGACCTCGGGCCAGGCCCGGTGCTCAACGGCGGCCACT	2	+	chr3:107398230-107398349
ALX3	BA_593036_007437	AGCCGCCCGCCAAGTACCTGCAGGACCTCGGGCCAGGCCCGGTGCTCAACGGCGGCCACTTCTACGAGGGCTCCGCGGAAGGTAACACGCCGGGGGTCGGGGGTGGTGGTGGAACCCCAT	2	+	chr3:107398290-107398409
ALX3	BA_593036_007438	TCTACGAGGGCTCCGCGGAAGGTAACACGCCGGGGGTCGGGGGTGGTGGTGGAACCCCATGTCGTTCTTATCCCCAGCCCTTCCTGGTCTCCCCGACTCTCCCGCTTTCTTGCTTCTTAA	1	+	chr3:107398350-107398469
ALX3	BA_593036_007439	GTCGTTCTTATCCCCAGCCCTTCCTGGTCTCCCCGACTCTCCCGCTTTCTTGCTTCTTAACTTTGGGTACGTCTCGCATTTTCCACGATTCCCTCGCTAGATCGCTGCTGGCCTGGCCGG	1	+	chr3:107398410-107398529
ALX3	BA_593036_007440	CTTTGGGTACGTCTCGCATTTTCCACGATTCCCTCGCTAGATCGCTGCTGGCCTGGCCGGACAAGGCCAGGGCATTGGGGACCGCAGAATCGCCTGTGTCCCCGGCCGGCAGAGGCAATG	1	+	chr3:107398470-107398589
ALX3	BA_593036_007441	ACAAGGCCAGGGCATTGGGGACCGCAGAATCGCCTGTGTCCCCGGCCGGCAGAGGCAATGGGAGGCGGGAGGTCAAAGGAGGGTGGAGTAGGGACGATCTTGGGCCCATTCCGACCCCCA	2	+	chr3:107398530-107398649
ALX3	BA_593036_007442	GGAGGCGGGAGGTCAAAGGAGGGTGGAGTAGGGACGATCTTGGGCCCATTCCGACCCCCAAGGTGATTGAACCTGGGAGGAGAGATCGCGCTCATCCGGAGCCGAGCCTCTCTGCCACCG	1	+	chr3:107398590-107398709
ALX3	BA_593036_007443	AGGTGATTGAACCTGGGAGGAGAGATCGCGCTCATCCGGAGCCGAGCCTCTCTGCCACCGACCCAGAAGAGGGGACTGGGTGGAGGGCCCCGGAGCCTAACTGGGCCCCAAAGCTGGGAG	2	+	chr3:107398650-107398769
ALX3	BA_593036_007444	ACCCAGAAGAGGGGACTGGGTGGAGGGCCCCGGAGCCTAACTGGGCCCCAAAGCTGGGAGAGAAGAGTTCTGCTTTTGTGCATGGCGCCCGCTGAGGGCGTAGAGGCTGGGCCTCGACTT	1	+	chr3:107398710-107398829
ALX3	BA_593036_007445	AGAAGAGTTCTGCTTTTGTGCATGGCGCCCGCTGAGGGCGTAGAGGCTGGGCCTCGACTTAGTGGCCAAACTGGACTCAGCGAGGGAAAGGCTGTGTCCTGGACTTACCCAGCTCTCATC	1	+	chr3:107398770-107398889
ALX3	BA_593036_007446	AGTGGCCAAACTGGACTCAGCGAGGGAAAGGCTGTGTCCTGGACTTACCCAGCTCTCATCCTCGGGCCCAGCCTCTGCAGGAAAAGGTTTTCTGATGCCGTTAAGTCGCTCCGCAGAGTG	1	+	chr3:107398830-107398949
ALX3	BA_593036_007447	CTCGGGCCCAGCCTCTGCAGGAAAAGGTTTTCTGATGCCGTTAAGTCGCTCCGCAGAGTGGCGGTGGCTGCTCCCCCTCAGAACTGGGACTGTCTTCAAGATCAAATAACTATGTTCTTG	1	+	chr3:107398890-107399009
ALX3	BA_593036_007448	GCGGTGGCTGCTCCCCCTCAGAACTGGGACTGTCTTCAAGATCAAATAACTATGTTCTTGTTTCTCAGATTAACTTGGCCTCCCCGTCGCCACGGGGATGGCTACCCTTCTTGCAGTTGG	1	+	chr3:107398950-107399069
ALX3	BA_593036_007449	TTTCTCAGATTAACTTGGCCTCCCCGTCGCCACGGGGATGGCTACCCTTCTTGCAGTTGGCATCTCGGCACCGAATCATCACCGCTGAGCCGTCGGAAGCGGTCCCGAACTATCCTAAAT	1	+	chr3:107399010-107399129
ALX3	BA_593036_007450	CATCTCGGCACCGAATCATCACCGCTGAGCCGTCGGAAGCGGTCCCGAACTATCCTAAATCCCAGGGCGCATCCCACTCCGGGGACCGTGCCCTGTGTGCTAAGGCGGGTCGGACCGTAC	1	+	chr3:107399070-107399189
ALX3	BA_593036_007451	CCCAGGGCGCATCCCACTCCGGGGACCGTGCCCTGTGTGCTAAGGCGGGTCGGACCGTACCATTATCTGAGAATGCGCCTGAGTGGCAGGGCCTGCCAAGACTCTTTTGCCGCCCACTGT	1	+	chr3:107399130-107399249
ALX3	BA_593036_007452	CATTATCTGAGAATGCGCCTGAGTGGCAGGGCCTGCCAAGACTCTTTTGCCGCCCACTGTACTCGCTGACCCACGAGTGGCTCAGCACCCACGCCCACCCCTCGTATGCAGCCACATTTC	1	+	chr3:107399190-107399309
ALX3	BA_593036_007453	ACTCGCTGACCCACGAGTGGCTCAGCACCCACGCCCACCCCTCGTATGCAGCCACATTTCGTAGCCTAGACCCAAAACTAGATCCCGGGAGATCCGCCAATGCGGCAATCGCCTGCTCCT	1	+	chr3:107399250-107399369
ALX3	BA_593036_007454	GTAGCCTAGACCCAAAACTAGATCCCGGGAGATCCGCCAATGCGGCAATCGCCTGCTCCTCGCGGGCCTCCTCAGAGAGGCTGGGCAGCGAGCAGCTCCTGGCTTCGTCCCGTCCGGGTG	2	+	chr3:107399310-107399429
ALX3	BA_593036_007455	CGCGGGCCTCCTCAGAGAGGCTGGGCAGCGAGCAGCTCCTGGCTTCGTCCCGTCCGGGTGGCGGGAGTGTGCAGGGGAGGCCCGGGAGGTGTGTTGGGGTCATCGGAGGAAATGAGCAAG	2	+	chr3:107399370-107399489
ALX3	BA_593036_007456	GCGGGAGTGTGCAGGGGAGGCCCGGGAGGTGTGTTGGGGTCATCGGAGGAAATGAGCAAGTCCGCGGAGCTTCGTGTCTAATGCCGTTTGAAAAAGGCTCTCCTGATAAAAACCACAGTT	1	+	chr3:107399430-107399549
ALX3	BA_593036_007457	TCCGCGGAGCTTCGTGTCTAATGCCGTTTGAAAAAGGCTCTCCTGATAAAAACCACAGTTGGGACTTAATGAGAAGCAGTTGGCCTGGCTCCTCTGATCCCTGCCAGACGGCGGCAGCCA	1	+	chr3:107399490-107399609
ALX4	BA_678916_001347	AAGGCTGGGCAGCTCCGACTCTAATGCTTCATTCTATAAATGCTTGTGGAGCCCCAGAACCAGGAGGCTGCTTTCCAGGAAGCACAGACTAGTAGAGTTCTGAGCAGGAATAGTGGTTAA	1	+	chr2:93480392-93480511
ALX4	BA_678916_001348	ATTCTATAAATGCTTGTGGAGCCCCAGAACCAGGAGGCTGCTTTCCAGGAAGCACAGACTAGTAGAGTTCTGAGCAGGAATAGTGGTTAAGTACCCCTGAGGGCAGGATCAGTAAGGATG	1	+	chr2:93480422-93480541
ALX4	BA_678916_001349	CAGGAGGCTGCTTTCCAGGAAGCACAGACTAGTAGAGTTCTGAGCAGGAATAGTGGTTAAGTACCCCTGAGGGCAGGATCAGTAAGGATGTAGAAACCCTGGCTGACAGGACGTGGGGTT	1	+	chr2:93480452-93480571
ALX4	BA_678916_001350	AGTAGAGTTCTGAGCAGGAATAGTGGTTAAGTACCCCTGAGGGCAGGATCAGTAAGGATGTAGAAACCCTGGCTGACAGGACGTGGGGTTCAGGGCTGAGCTTCAAATCATGAAGCAGAC	1	+	chr2:93480482-93480601
ALX4	BA_678916_001351	GTACCCCTGAGGGCAGGATCAGTAAGGATGTAGAAACCCTGGCTGACAGGACGTGGGGTTCAGGGCTGAGCTTCAAATCATGAAGCAGACAAAACCACAAGAATGATAGAAGATAAGCCA	1	+	chr2:93480512-93480631
ALX4	BA_678916_001352	TAGAAACCCTGGCTGACAGGACGTGGGGTTCAGGGCTGAGCTTCAAATCATGAAGCAGACAAAACCACAAGAATGATAGAAGATAAGCCACCGAGAGCCATTTTGCTCTCTGAAACTGAA	1	+	chr2:93480542-93480661
ALX4	BA_678916_001353	CAGGGCTGAGCTTCAAATCATGAAGCAGACAAAACCACAAGAATGATAGAAGATAAGCCACCGAGAGCCATTTTGCTCTCTGAAACTGAACAATGATTCAGGTTTGAGGGACTCAGTCTA	1	+	chr2:93480572-93480691
ALX4	BA_678916_001354	AAAACCACAAGAATGATAGAAGATAAGCCACCGAGAGCCATTTTGCTCTCTGAAACTGAACAATGATTCAGGTTTGAGGGACTCAGTCTACCCATAGCAAAGTAGATATGCAAAGACAAT	1	+	chr2:93480602-93480721
ALX4	BA_678916_001355	CCGAGAGCCATTTTGCTCTCTGAAACTGAACAATGATTCAGGTTTGAGGGACTCAGTCTACCCATAGCAAAGTAGATATGCAAAGACAATCACGTGAGGTCAAATTGATGTGGCTTCTGG	1	+	chr2:93480632-93480751
ALX4	BA_678916_001356	CAATGATTCAGGTTTGAGGGACTCAGTCTACCCATAGCAAAGTAGATATGCAAAGACAATCACGTGAGGTCAAATTGATGTGGCTTCTGGCACAATAGACATTCAATAAACACGAGACCC	1	+	chr2:93480662-93480781
ALX4	BA_678916_001357	CCCATAGCAAAGTAGATATGCAAAGACAATCACGTGAGGTCAAATTGATGTGGCTTCTGGCACAATAGACATTCAATAAACACGAGACCCTTGGGAGGGTTAAGGTCTGTTGGCCGGAGA	1	+	chr2:93480692-93480811
ALX4	BA_678916_001358	CACGTGAGGTCAAATTGATGTGGCTTCTGGCACAATAGACATTCAATAAACACGAGACCCTTGGGAGGGTTAAGGTCTGTTGGCCGGAGAGACAGACACAGGTTTCTGACCAGCCATGGG	1	+	chr2:93480722-93480841
ALX4	BA_678916_001359	CACAATAGACATTCAATAAACACGAGACCCTTGGGAGGGTTAAGGTCTGTTGGCCGGAGAGACAGACACAGGTTTCTGACCAGCCATGGGGGGATGGGTGCCATAGTGGTCCAGCGCCCC	1	+	chr2:93480752-93480871
ALX4	BA_678916_001360	TTGGGAGGGTTAAGGTCTGTTGGCCGGAGAGACAGACACAGGTTTCTGACCAGCCATGGGGGGATGGGTGCCATAGTGGTCCAGCGCCCCTGGCTCTGAGGAATATCTTTATTAACGAGC	1	+	chr2:93480782-93480901
ALX4	BA_678916_001361	GACAGACACAGGTTTCTGACCAGCCATGGGGGGATGGGTGCCATAGTGGTCCAGCGCCCCTGGCTCTGAGGAATATCTTTATTAACGAGCACTTCAAGGTAAGCCAGCGATGAAAACCAG	1	+	chr2:93480812-93480931
ALX4	BA_678916_001362	GGGATGGGTGCCATAGTGGTCCAGCGCCCCTGGCTCTGAGGAATATCTTTATTAACGAGCACTTCAAGGTAAGCCAGCGATGAAAACCAGATGTGGGATCCTGCAGTCTGCTTTGAGTAA	1	+	chr2:93480842-93480961
ALX4	BA_678916_001363	TGGCTCTGAGGAATATCTTTATTAACGAGCACTTCAAGGTAAGCCAGCGATGAAAACCAGATGTGGGATCCTGCAGTCTGCTTTGAGTAAGGACCGAAGATAACAAGGGGTGGAGTGGTG	1	+	chr2:93480872-93480991
ALX4	BA_678916_001364	ACTTCAAGGTAAGCCAGCGATGAAAACCAGATGTGGGATCCTGCAGTCTGCTTTGAGTAAGGACCGAAGATAACAAGGGGTGGAGTGGTGTGGGAGCAGAGATAGGTGAGATTGGAGGTG	1	+	chr2:93480902-93481021
ALX4	BA_678916_001365	ATGTGGGATCCTGCAGTCTGCTTTGAGTAAGGACCGAAGATAACAAGGGGTGGAGTGGTGTGGGAGCAGAGATAGGTGAGATTGGAGGTGGATGCAAGTCTCTCCTATGTTTTCTCTGGG	1	+	chr2:93480932-93481051
ALX4	BA_678916_001366	GGACCGAAGATAACAAGGGGTGGAGTGGTGTGGGAGCAGAGATAGGTGAGATTGGAGGTGGATGCAAGTCTCTCCTATGTTTTCTCTGGGCGCTTCAAGTGCAGAGAGTGCATCCTTTGC	1	+	chr2:93480962-93481081
ALX4	BA_678916_001367	TGGGAGCAGAGATAGGTGAGATTGGAGGTGGATGCAAGTCTCTCCTATGTTTTCTCTGGGCGCTTCAAGTGCAGAGAGTGCATCCTTTGCTTTAGAGTGTTCAGGGACTCCCTACCTCCA	1	+	chr2:93480992-93481111
ALX4	BA_678916_001368	GATGCAAGTCTCTCCTATGTTTTCTCTGGGCGCTTCAAGTGCAGAGAGTGCATCCTTTGCTTTAGAGTGTTCAGGGACTCCCTACCTCCAATCTGCTCCAGCCTCCTCATTCCAGATTTC	1	+	chr2:93481022-93481141
ALX4	BA_678916_001369	CGCTTCAAGTGCAGAGAGTGCATCCTTTGCTTTAGAGTGTTCAGGGACTCCCTACCTCCAATCTGCTCCAGCCTCCTCATTCCAGATTTCCCGTGCAATCTAAAGAGGGATGCTCTAAAG	1	+	chr2:93481052-93481171
ALX4	BA_678916_001370	TTTAGAGTGTTCAGGGACTCCCTACCTCCAATCTGCTCCAGCCTCCTCATTCCAGATTTCCCGTGCAATCTAAAGAGGGATGCTCTAAAGACTCTCCCACCTGAGCTTTTCTGCAGCCGG	1	+	chr2:93481082-93481201
ALX4	BA_678916_001371	ATCTGCTCCAGCCTCCTCATTCCAGATTTCCCGTGCAATCTAAAGAGGGATGCTCTAAAGACTCTCCCACCTGAGCTTTTCTGCAGCCGGAAGCCAGGGAGTTAGCTTTGAGGTCTCCAT	1	+	chr2:93481112-93481231
ALX4	BA_678916_001372	CCGTGCAATCTAAAGAGGGATGCTCTAAAGACTCTCCCACCTGAGCTTTTCTGCAGCCGGAAGCCAGGGAGTTAGCTTTGAGGTCTCCATTGGTGACCTTTGCTTCAACTTACCAAGTCC	1	+	chr2:93481142-93481261
ALX4	BA_678916_001373	ACTCTCCCACCTGAGCTTTTCTGCAGCCGGAAGCCAGGGAGTTAGCTTTGAGGTCTCCATTGGTGACCTTTGCTTCAACTTACCAAGTCCAGACAAGGGACTGCCTTCTGCACAGGCTCC	1	+	chr2:93481172-93481291
ALX4	BA_678916_001374	AAGCCAGGGAGTTAGCTTTGAGGTCTCCATTGGTGACCTTTGCTTCAACTTACCAAGTCCAGACAAGGGACTGCCTTCTGCACAGGCTCCTAGGAGGAGCAGCTGACTTCTCAGTGTTCC	1	+	chr2:93481202-93481321
ALX4	BA_678916_001375	TGGTGACCTTTGCTTCAACTTACCAAGTCCAGACAAGGGACTGCCTTCTGCACAGGCTCCTAGGAGGAGCAGCTGACTTCTCAGTGTTCCTTCTTACTGTGTGGTTTTTGACCCTGTGTC	1	+	chr2:93481232-93481351
ALX4	BA_678916_001376	AGACAAGGGACTGCCTTCTGCACAGGCTCCTAGGAGGAGCAGCTGACTTCTCAGTGTTCCTTCTTACTGTGTGGTTTTTGACCCTGTGTCTTCACCTCTCAGAGCCCCGGTTTGCTCACA	1	+	chr2:93481262-93481381
ALX4	BA_678916_001377	TAGGAGGAGCAGCTGACTTCTCAGTGTTCCTTCTTACTGTGTGGTTTTTGACCCTGTGTCTTCACCTCTCAGAGCCCCGGTTTGCTCACAGAAAAATGGGAGAGTCCAACGTCTCTCTGT	1	+	chr2:93481292-93481411
ALX4	BA_678916_001378	TTCTTACTGTGTGGTTTTTGACCCTGTGTCTTCACCTCTCAGAGCCCCGGTTTGCTCACAGAAAAATGGGAGAGTCCAACGTCTCTCTGTTAGTTGTGAGGTGCCACCAATGCTTAGCCC	1	+	chr2:93481322-93481441
ALX4	BA_678916_001379	TTCACCTCTCAGAGCCCCGGTTTGCTCACAGAAAAATGGGAGAGTCCAACGTCTCTCTGTTAGTTGTGAGGTGCCACCAATGCTTAGCCCAGCCCAGAACCTCCTGAAAGTTCTATCCCC	1	+	chr2:93481352-93481471
ALX4	BA_678916_001380	GAAAAATGGGAGAGTCCAACGTCTCTCTGTTAGTTGTGAGGTGCCACCAATGCTTAGCCCAGCCCAGAACCTCCTGAAAGTTCTATCCCCTTGCTATGTGACGATCCAGATGGCCGCATA	1	+	chr2:93481382-93481501
ALX4	BA_678916_001381	TAGTTGTGAGGTGCCACCAATGCTTAGCCCAGCCCAGAACCTCCTGAAAGTTCTATCCCCTTGCTATGTGACGATCCAGATGGCCGCATAAATCCATGCCATGGGTGTGGTAATGCATGC	1	+	chr2:93481412-93481531
ALX4	BA_678916_001382	ATCAACAAAATTTGAGCCTTTTATTTTACAATGTGGGGTGAGTGGGTGGGCTTGGTGAAGAGAGAGCCTGACTTCCCAACGGGTTGACAGAGCTAACTACCCTGCCAGGAGGAGCAGGAA	1	+	chr2:93481615-93481734
ALX4	BA_678916_001383	ATGTGGGGTGAGTGGGTGGGCTTGGTGAAGAGAGAGCCTGACTTCCCAACGGGTTGACAGAGCTAACTACCCTGCCAGGAGGAGCAGGAAGGATGTCTCTGAAGGCTCCATTCTCAACCT	1	+	chr2:93481645-93481764
ALX4	BA_678916_001384	AGAGAGCCTGACTTCCCAACGGGTTGACAGAGCTAACTACCCTGCCAGGAGGAGCAGGAAGGATGTCTCTGAAGGCTCCATTCTCAACCTGGCTTTGAGGGGCGGGGGGGTCATTCAAGC	1	+	chr2:93481675-93481794
ALX4	BA_678916_001385	AGCTAACTACCCTGCCAGGAGGAGCAGGAAGGATGTCTCTGAAGGCTCCATTCTCAACCTGGCTTTGAGGGGCGGGGGGGTCATTCAAGCGGCCAGAGGTCTTGGCCTGAGAAAGGGACG	1	+	chr2:93481705-93481824
ALX4	BA_678916_001386	GGATGTCTCTGAAGGCTCCATTCTCAACCTGGCTTTGAGGGGCGGGGGGGTCATTCAAGCGGCCAGAGGTCTTGGCCTGAGAAAGGGACGAGGTGTTCGGCTCCAGAACTTGAAGCCAGG	1	+	chr2:93481735-93481854
ALX4	BA_678916_001387	GGCTTTGAGGGGCGGGGGGGTCATTCAAGCGGCCAGAGGTCTTGGCCTGAGAAAGGGACGAGGTGTTCGGCTCCAGAACTTGAAGCCAGGCCAGTCCCTGCAGTGACTGCATGAATGTAT	1	+	chr2:93481765-93481884
ALX4	BA_678916_001388	GGCCAGAGGTCTTGGCCTGAGAAAGGGACGAGGTGTTCGGCTCCAGAACTTGAAGCCAGGCCAGTCCCTGCAGTGACTGCATGAATGTATATCTCACTGTACCGGAGCCCAGGGTCCTTA	1	+	chr2:93481795-93481914
ALX4	BA_678916_001389	AGGTGTTCGGCTCCAGAACTTGAAGCCAGGCCAGTCCCTGCAGTGACTGCATGAATGTATATCTCACTGTACCGGAGCCCAGGGTCCTTACAGGGCAAGGAAATAGTTAAGATGCCAAAG	1	+	chr2:93481825-93481944
ALX4	BA_678916_001390	CCAGTCCCTGCAGTGACTGCATGAATGTATATCTCACTGTACCGGAGCCCAGGGTCCTTACAGGGCAAGGAAATAGTTAAGATGCCAAAGTGGCAAGTCCGGACCATTTTGAGATCCGTT	1	+	chr2:93481855-93481974
ALX4	BA_678916_001391	ATCTCACTGTACCGGAGCCCAGGGTCCTTACAGGGCAAGGAAATAGTTAAGATGCCAAAGTGGCAAGTCCGGACCATTTTGAGATCCGTTGTATGTGAGTTACTGGGAAGAATCGGGAAT	1	+	chr2:93481885-93482004
ALX4	BA_678916_001392	CAGGGCAAGGAAATAGTTAAGATGCCAAAGTGGCAAGTCCGGACCATTTTGAGATCCGTTGTATGTGAGTTACTGGGAAGAATCGGGAATGGGGAGGCGGGATTTGAAAACCCCAGCAAA	1	+	chr2:93481915-93482034
ALX4	BA_678916_001393	TGGCAAGTCCGGACCATTTTGAGATCCGTTGTATGTGAGTTACTGGGAAGAATCGGGAATGGGGAGGCGGGATTTGAAAACCCCAGCAAAGGTCCTGGCAGGCAGGCCCCGGGCTGCTCT	1	+	chr2:93481945-93482064
ALX4	BA_678916_001394	GTATGTGAGTTACTGGGAAGAATCGGGAATGGGGAGGCGGGATTTGAAAACCCCAGCAAAGGTCCTGGCAGGCAGGCCCCGGGCTGCTCTGCCAAGTTCACCAAGAAGCATTCAAAGGAT	1	+	chr2:93481975-93482094
ALX4	BA_678916_001395	GGGGAGGCGGGATTTGAAAACCCCAGCAAAGGTCCTGGCAGGCAGGCCCCGGGCTGCTCTGCCAAGTTCACCAAGAAGCATTCAAAGGATTCGCTAGGCCAGAGGCCCATCTGACTCCGA	1	+	chr2:93482005-93482124
ALX4	BA_678916_001396	GGTCCTGGCAGGCAGGCCCCGGGCTGCTCTGCCAAGTTCACCAAGAAGCATTCAAAGGATTCGCTAGGCCAGAGGCCCATCTGACTCCGAAAGTCAAAACCTCTTACAGTTCTTTAACCT	1	+	chr2:93482035-93482154
ALX4	BA_678916_001397	GCCAAGTTCACCAAGAAGCATTCAAAGGATTCGCTAGGCCAGAGGCCCATCTGACTCCGAAAGTCAAAACCTCTTACAGTTCTTTAACCTGTCAATAAAATTTACATTCTCCCATACCCT	1	+	chr2:93482065-93482184
ALX4	BA_678916_001398	TCGCTAGGCCAGAGGCCCATCTGACTCCGAAAGTCAAAACCTCTTACAGTTCTTTAACCTGTCAATAAAATTTACATTCTCCCATACCCTAGACCCTAGCTGAAACCGTGCATCAAATTG	1	+	chr2:93482095-93482214
ALX4	BA_678916_001399	AAGTCAAAACCTCTTACAGTTCTTTAACCTGTCAATAAAATTTACATTCTCCCATACCCTAGACCCTAGCTGAAACCGTGCATCAAATTGCAGCCCAGCTTCGGAAGCCAAGGGATGACT	1	+	chr2:93482125-93482244
ALX4	BA_678916_001400	GTCAATAAAATTTACATTCTCCCATACCCTAGACCCTAGCTGAAACCGTGCATCAAATTGCAGCCCAGCTTCGGAAGCCAAGGGATGACTGCACCTCCCCAATCTAGCCTAAAATCCAAA	1	+	chr2:93482155-93482274
ALX4	BA_678916_001401	AGACCCTAGCTGAAACCGTGCATCAAATTGCAGCCCAGCTTCGGAAGCCAAGGGATGACTGCACCTCCCCAATCTAGCCTAAAATCCAAAAGGCCCCGAGGCTTCTCCGGGTCGAATCGC	1	+	chr2:93482185-93482304
ALX4	BA_678916_001402	CAGCCCAGCTTCGGAAGCCAAGGGATGACTGCACCTCCCCAATCTAGCCTAAAATCCAAAAGGCCCCGAGGCTTCTCCGGGTCGAATCGCCTCTAGCCAGTGAGTGGCATCTCTAGTGAG	1	+	chr2:93482215-93482334
ALX4	BA_678916_001403	GGAGCAAGTCAGGGGGGAAAAAATCACTCTTTTTTTTCTCCTTCAAAACCTTAAGAGGGTTTGGGAGATCTGGTGAACTTTCCGAAGCATCCGAATCTTTTTACGGAGCTTTTGGTTCTT	1	+	chr2:93482404-93482523
ALX4	BA_678916_001404	TTTTTTTCTCCTTCAAAACCTTAAGAGGGTTTGGGAGATCTGGTGAACTTTCCGAAGCATCCGAATCTTTTTACGGAGCTTTTGGTTCTTTCTCAAGGCCAGCTGTAGGGAGCAAAGGGG	1	+	chr2:93482434-93482553
ALX4	BA_678916_001405	TTGGGAGATCTGGTGAACTTTCCGAAGCATCCGAATCTTTTTACGGAGCTTTTGGTTCTTTCTCAAGGCCAGCTGTAGGGAGCAAAGGGGTGGGGGTGGGGGTGAGAAAGAGAAAAGGCG	1	+	chr2:93482464-93482583
ALX4	BA_678916_001406	CGCGCAGGCCAGGCATGAACGCTGAGACTTGCGTCTCTTACTGCGAGTCCCCGGCCGCTGCCATGGACGCCTACTACAGCCCGGTGTCGCAGAGCCGGGAAGGTTCGTCGCCTTTTAGGG	2	+	chr2:93482802-93482921
ALX4	BA_678916_001407	GCGTCTCTTACTGCGAGTCCCCGGCCGCTGCCATGGACGCCTACTACAGCCCGGTGTCGCAGAGCCGGGAAGGTTCGTCGCCTTTTAGGGGATTCCCAGGAGGCGACAAGTTCGGTACAA	1	+	chr2:93482832-93482951
ALX4	BA_678916_001408	CCATGGACGCCTACTACAGCCCGGTGTCGCAGAGCCGGGAAGGTTCGTCGCCTTTTAGGGGATTCCCAGGAGGCGACAAGTTCGGTACAACTTTTCTGTCGGCCGGGGCCAAAGGACAGG	1	+	chr2:93482862-93482981
ALX4	BA_678916_001409	AGAGCCGGGAAGGTTCGTCGCCTTTTAGGGGATTCCCAGGAGGCGACAAGTTCGGTACAACTTTTCTGTCGGCCGGGGCCAAAGGACAGGGATTCGGGGACGCCAAGAGCCGGGCCCGCT	1	+	chr2:93482892-93483011
ALX4	BA_678916_001410	GATTCCCAGGAGGCGACAAGTTCGGTACAACTTTTCTGTCGGCCGGGGCCAAAGGACAGGGATTCGGGGACGCCAAGAGCCGGGCCCGCTACGGCGCGGGGCAGCAGGACCTGGCGGCAC	2	+	chr2:93482922-93483041
ALX4	BA_678916_001411	CTTTTCTGTCGGCCGGGGCCAAAGGACAGGGATTCGGGGACGCCAAGAGCCGGGCCCGCTACGGCGCGGGGCAGCAGGACCTGGCGGCACCGCTGGAGAGCAGCTCCGGGGCGCGGGGAT	2	+	chr2:93482952-93483071
ALX4	BA_678916_001412	GATTCGGGGACGCCAAGAGCCGGGCCCGCTACGGCGCGGGGCAGCAGGACCTGGCGGCACCGCTGGAGAGCAGCTCCGGGGCGCGGGGATCCTTTAACAAGTTCCAGCCGCAGCCGCCCA	2	+	chr2:93482982-93483101
ALX4	BA_678916_001413	ACGGCGCGGGGCAGCAGGACCTGGCGGCACCGCTGGAGAGCAGCTCCGGGGCGCGGGGATCCTTTAACAAGTTCCAGCCGCAGCCGCCCACCCCACAGCCGCCGCCCGCTCCACCCGCGC	2	+	chr2:93483012-93483131
ALX4	BA_678916_001414	CGCTGGAGAGCAGCTCCGGGGCGCGGGGATCCTTTAACAAGTTCCAGCCGCAGCCGCCCACCCCACAGCCGCCGCCCGCTCCACCCGCGCCGCCTGCGCATCTCTACTTGCAGAGGGGCG	2	+	chr2:93483042-93483161
ALX4	BA_678916_001415	CCTTTAACAAGTTCCAGCCGCAGCCGCCCACCCCACAGCCGCCGCCCGCTCCACCCGCGCCGCCTGCGCATCTCTACTTGCAGAGGGGCGCCTGCAAAACGCCCCCGGACGGTAGCCTCA	2	+	chr2:93483072-93483191
ALX4	BA_678916_001416	CCCCACAGCCGCCGCCCGCTCCACCCGCGCCGCCTGCGCATCTCTACTTGCAGAGGGGCGCCTGCAAAACGCCCCCGGACGGTAGCCTCAAGCTCCAGGAGGGCAGCGGCGGCCACAACG	2	+	chr2:93483102-93483221
ALX4	BA_678916_001417	CGCCTGCGCATCTCTACTTGCAGAGGGGCGCCTGCAAAACGCCCCCGGACGGTAGCCTCAAGCTCCAGGAGGGCAGCGGCGGCCACAACGCGGCCTTGCAGGTCCCCTGCTACGGTGAGT	2	+	chr2:93483132-93483251
ALX4	BA_678916_001418	CCTGCAAAACGCCCCCGGACGGTAGCCTCAAGCTCCAGGAGGGCAGCGGCGGCCACAACGCGGCCTTGCAGGTCCCCTGCTACGGTGAGTGCACGTGCGAGACCCCGGGGTCCGCGGCTT	2	+	chr2:93483162-93483281
ALX4	BA_678916_001419	AGCTCCAGGAGGGCAGCGGCGGCCACAACGCGGCCTTGCAGGTCCCCTGCTACGGTGAGTGCACGTGCGAGACCCCGGGGTCCGCGGCTTCGCTAACCCCAAAACCCGCTGGGCTGGCGG	2	+	chr2:93483192-93483311
ALX4	BA_678916_001420	CGGCCTTGCAGGTCCCCTGCTACGGTGAGTGCACGTGCGAGACCCCGGGGTCCGCGGCTTCGCTAACCCCAAAACCCGCTGGGCTGGCGGGAGGCTGGAGGTGGAGGCTGGAGGAACTCC	2	+	chr2:93483222-93483341
ALX4	BA_678916_001421	GCACGTGCGAGACCCCGGGGTCCGCGGCTTCGCTAACCCCAAAACCCGCTGGGCTGGCGGGAGGCTGGAGGTGGAGGCTGGAGGAACTCCGGGTCTGTCCGGGTCTAACGCTTCGAGGGC	2	+	chr2:93483252-93483371
ALX4	BA_678916_001422	CGCTAACCCCAAAACCCGCTGGGCTGGCGGGAGGCTGGAGGTGGAGGCTGGAGGAACTCCGGGTCTGTCCGGGTCTAACGCTTCGAGGGCGTCCCTGTGTCCTGCTGCATCCCCAGCCCT	2	+	chr2:93483282-93483401
ALX4	BA_678916_001423	GAGGCTGGAGGTGGAGGCTGGAGGAACTCCGGGTCTGTCCGGGTCTAACGCTTCGAGGGCGTCCCTGTGTCCTGCTGCATCCCCAGCCCTGTCCCGGGTGCAGAGCGTTCTGGCTTCCCG	2	+	chr2:93483312-93483431
ALX4	BA_678916_001424	GGGTCTGTCCGGGTCTAACGCTTCGAGGGCGTCCCTGTGTCCTGCTGCATCCCCAGCCCTGTCCCGGGTGCAGAGCGTTCTGGCTTCCCGGTTTTTTTTTCTCCGTTCGTTCAAACTTTT	1	+	chr2:93483342-93483461
ALX4	BA_678916_001425	GTCCCTGTGTCCTGCTGCATCCCCAGCCCTGTCCCGGGTGCAGAGCGTTCTGGCTTCCCGGTTTTTTTTTCTCCGTTCGTTCAAACTTTTCGCTTTGCGCTGCCCCGCGGGGCCGGATTT	1	+	chr2:93483372-93483491
ALX4	BA_678916_001426	GTCCCGGGTGCAGAGCGTTCTGGCTTCCCGGTTTTTTTTTCTCCGTTCGTTCAAACTTTTCGCTTTGCGCTGCCCCGCGGGGCCGGATTTGAAGCGGATGCTTCGTCCGGGTTCCGGGAG	1	+	chr2:93483402-93483521
ALX4	BA_678916_001427	GTTTTTTTTTCTCCGTTCGTTCAAACTTTTCGCTTTGCGCTGCCCCGCGGGGCCGGATTTGAAGCGGATGCTTCGTCCGGGTTCCGGGAGGACGGATGCTAGAAGCTTCTCCCGCTGCAT	1	+	chr2:93483432-93483551
ALX4	BA_678916_001428	CGCTTTGCGCTGCCCCGCGGGGCCGGATTTGAAGCGGATGCTTCGTCCGGGTTCCGGGAGGACGGATGCTAGAAGCTTCTCCCGCTGCATTCCGCGCGTGGCTGCGGGGCCGCCGAGGTT	2	+	chr2:93483462-93483581
ALX4	BA_678916_001429	GAAGCGGATGCTTCGTCCGGGTTCCGGGAGGACGGATGCTAGAAGCTTCTCCCGCTGCATTCCGCGCGTGGCTGCGGGGCCGCCGAGGTTTCGCTCTCCCGCCCTGGCAGGCTCCGCGCA	2	+	chr2:93483492-93483611
ALX4	BA_678916_001430	GACGGATGCTAGAAGCTTCTCCCGCTGCATTCCGCGCGTGGCTGCGGGGCCGCCGAGGTTTCGCTCTCCCGCCCTGGCAGGCTCCGCGCACCGCAGGTAAGAAACTGCAGGTGCCGAGCG	2	+	chr2:93483522-93483641
ALX4	BA_678916_001431	TCCGCGCGTGGCTGCGGGGCCGCCGAGGTTTCGCTCTCCCGCCCTGGCAGGCTCCGCGCACCGCAGGTAAGAAACTGCAGGTGCCGAGCGCGTCGGGGAGTCCGGAGCGCAGTCTCCCGG	2	+	chr2:93483552-93483671
ALX4	BA_678916_001432	TCGCTCTCCCGCCCTGGCAGGCTCCGCGCACCGCAGGTAAGAAACTGCAGGTGCCGAGCGCGTCGGGGAGTCCGGAGCGCAGTCTCCCGGGTCTGAATTAGAAGCCCCAATACCGCGTCG	2	+	chr2:93483582-93483701
ALX4	BA_678916_001433	CCGCAGGTAAGAAACTGCAGGTGCCGAGCGCGTCGGGGAGTCCGGAGCGCAGTCTCCCGGGTCTGAATTAGAAGCCCCAATACCGCGTCGCGAAGCTCCTGCAAGTCTGTGTCCGGAGAA	1	+	chr2:93483612-93483731
ALX4	BA_678916_001434	CGTCGGGGAGTCCGGAGCGCAGTCTCCCGGGTCTGAATTAGAAGCCCCAATACCGCGTCGCGAAGCTCCTGCAAGTCTGTGTCCGGAGAACCAGGCACCTCAGAAAACCCGAGTCCTGGC	1	+	chr2:93483642-93483761
ALX4	BA_678916_001435	GTCTGAATTAGAAGCCCCAATACCGCGTCGCGAAGCTCCTGCAAGTCTGTGTCCGGAGAACCAGGCACCTCAGAAAACCCGAGTCCTGGCCAGGAGCGCAGACCGCGTAGGGGACCGCGG	1	+	chr2:93483672-93483791
ALX4	BA_678916_001436	CGAAGCTCCTGCAAGTCTGTGTCCGGAGAACCAGGCACCTCAGAAAACCCGAGTCCTGGCCAGGAGCGCAGACCGCGTAGGGGACCGCGGCCAGCCTGTCTGCGGTGTCTGGAAGTAGCC	2	+	chr2:93483702-93483821
ALX4	BA_678916_001437	CCAGGCACCTCAGAAAACCCGAGTCCTGGCCAGGAGCGCAGACCGCGTAGGGGACCGCGGCCAGCCTGTCTGCGGTGTCTGGAAGTAGCCAACATCAGGAAAGCACAGTTTAGTACTCAA	1	+	chr2:93483732-93483851
ALX4	BA_678916_001438	CAGGAGCGCAGACCGCGTAGGGGACCGCGGCCAGCCTGTCTGCGGTGTCTGGAAGTAGCCAACATCAGGAAAGCACAGTTTAGTACTCAACGGGTGGGAAAGCACTAATTCTGAGATAAC	1	+	chr2:93483762-93483881
ALX4	BA_678916_001439	CCAGCCTGTCTGCGGTGTCTGGAAGTAGCCAACATCAGGAAAGCACAGTTTAGTACTCAACGGGTGGGAAAGCACTAATTCTGAGATAACAGCCAGCACAGAGCTGTGGGAAAGAAACAA	1	+	chr2:93483792-93483911
ALX4	BA_678916_001440	AACATCAGGAAAGCACAGTTTAGTACTCAACGGGTGGGAAAGCACTAATTCTGAGATAACAGCCAGCACAGAGCTGTGGGAAAGAAACAAAATGCTGGCTCCTGGTTTGGGCCCACAAGG	1	+	chr2:93483822-93483941
ALX4	BA_678916_001441	CGGGTGGGAAAGCACTAATTCTGAGATAACAGCCAGCACAGAGCTGTGGGAAAGAAACAAAATGCTGGCTCCTGGTTTGGGCCCACAAGGAACCTGATCGAGATGGCCTAAATGACCTCC	1	+	chr2:93483852-93483971
ALX4	BA_678916_001442	AGCCAGCACAGAGCTGTGGGAAAGAAACAAAATGCTGGCTCCTGGTTTGGGCCCACAAGGAACCTGATCGAGATGGCCTAAATGACCTCCAAGCCCCCTTGAAGTAGCTGCAGGGTCCAG	1	+	chr2:93483882-93484001
ALX4	BA_678916_001443	AATGCTGGCTCCTGGTTTGGGCCCACAAGGAACCTGATCGAGATGGCCTAAATGACCTCCAAGCCCCCTTGAAGTAGCTGCAGGGTCCAGGCCGGAGTCCTTAGTGCTCAGCTACCATTG	1	+	chr2:93483912-93484031
ALX4	BA_678916_001444	AACCTGATCGAGATGGCCTAAATGACCTCCAAGCCCCCTTGAAGTAGCTGCAGGGTCCAGGCCGGAGTCCTTAGTGCTCAGCTACCATTGTAGACGGGACAACTGATCAAATGAATTAGG	1	+	chr2:93483942-93484061
ALX4	BA_678916_001445	AAGCCCCCTTGAAGTAGCTGCAGGGTCCAGGCCGGAGTCCTTAGTGCTCAGCTACCATTGTAGACGGGACAACTGATCAAATGAATTAGGAAACCAAAGCCAGTCAAGCGCCTAAACTTT	1	+	chr2:93483972-93484091
ALX4	BA_678916_001446	GCCGGAGTCCTTAGTGCTCAGCTACCATTGTAGACGGGACAACTGATCAAATGAATTAGGAAACCAAAGCCAGTCAAGCGCCTAAACTTTCTCTTTTCCCACAGCATCGAAGTTAGAGAA	1	+	chr2:93484002-93484121
ALX4	BA_678916_001447	TAGACGGGACAACTGATCAAATGAATTAGGAAACCAAAGCCAGTCAAGCGCCTAAACTTTCTCTTTTCCCACAGCATCGAAGTTAGAGAACCCAAAGCTCAAAGAAGGGAGAAAGACCTT	1	+	chr2:93484032-93484151
ALX4	BA_678916_001448	AAACCAAAGCCAGTCAAGCGCCTAAACTTTCTCTTTTCCCACAGCATCGAAGTTAGAGAACCCAAAGCTCAAAGAAGGGAGAAAGACCTTCTCCCCAAGGCCTTTGTCTTTGGGCTGGGT	1	+	chr2:93484062-93484181
ALX4	BA_678916_001449	CTCTTTTCCCACAGCATCGAAGTTAGAGAACCCAAAGCTCAAAGAAGGGAGAAAGACCTTCTCCCCAAGGCCTTTGTCTTTGGGCTGGGTGCTAGTGAAGAGGGCTGGTTCTTGACAGAG	1	+	chr2:93484092-93484211
ALX4	BA_678916_001450	CCCAAAGCTCAAAGAAGGGAGAAAGACCTTCTCCCCAAGGCCTTTGTCTTTGGGCTGGGTGCTAGTGAAGAGGGCTGGTTCTTGACAGAGCAACGACTCTGCCGGTTCCACTCCAGGTAG	1	+	chr2:93484122-93484241
ALX4	BA_678916_001451	CTCCCCAAGGCCTTTGTCTTTGGGCTGGGTGCTAGTGAAGAGGGCTGGTTCTTGACAGAGCAACGACTCTGCCGGTTCCACTCCAGGTAGGATATAGTGGCACTAAGCCTGAGGACACAG	1	+	chr2:93484152-93484271
ALX4	BA_678916_001452	GCTAGTGAAGAGGGCTGGTTCTTGACAGAGCAACGACTCTGCCGGTTCCACTCCAGGTAGGATATAGTGGCACTAAGCCTGAGGACACAGGTGAGACATGGTAGAGACCTTGATGGCCAG	1	+	chr2:93484182-93484301
ALX4	BA_678916_001453	CAACGACTCTGCCGGTTCCACTCCAGGTAGGATATAGTGGCACTAAGCCTGAGGACACAGGTGAGACATGGTAGAGACCTTGATGGCCAGAATAACTCAGGAACACAGCCCACACTTTTA	1	+	chr2:93484212-93484331
ALX4	BA_678916_001454	GATATAGTGGCACTAAGCCTGAGGACACAGGTGAGACATGGTAGAGACCTTGATGGCCAGAATAACTCAGGAACACAGCCCACACTTTTAGTGTGCACGAAAACATTCTCCTTCCAACTT	1	+	chr2:93484242-93484361
ALX4	BA_678916_001455	GTGAGACATGGTAGAGACCTTGATGGCCAGAATAACTCAGGAACACAGCCCACACTTTTAGTGTGCACGAAAACATTCTCCTTCCAACTTCGCTTAATCAGAGACAGGGCTGGGACAAGC	1	+	chr2:93484272-93484391
ALX4	BA_678916_001456	AATAACTCAGGAACACAGCCCACACTTTTAGTGTGCACGAAAACATTCTCCTTCCAACTTCGCTTAATCAGAGACAGGGCTGGGACAAGCTGCTGGGGGGGGGGGGACTGTAGACATAAC	1	+	chr2:93484302-93484421
ALX4	BA_678916_001457	GTGTGCACGAAAACATTCTCCTTCCAACTTCGCTTAATCAGAGACAGGGCTGGGACAAGCTGCTGGGGGGGGGGGGACTGTAGACATAACCACCCTTTAACTTAAACTTGAATTCTACAC	1	+	chr2:93484332-93484451
ALX4	BA_678916_001458	CACCTTTATTGGCCATCATGGTCACGTACCAAATGCATACATTCATGTGACTTCAAAAAAAGCTACAAACCCTCAAACTGACAGGACAGGGCTAAAAGCCTATCTAGAAAGTTCTGCTGG	1	+	chr2:93484473-93484592
ALX4	BA_678916_001459	AAATGCATACATTCATGTGACTTCAAAAAAAGCTACAAACCCTCAAACTGACAGGACAGGGCTAAAAGCCTATCTAGAAAGTTCTGCTGGCCCTTCTGGACTATACCACCGTTCTCTCCA	1	+	chr2:93484503-93484622
ALX4	BA_678916_001460	AGCTACAAACCCTCAAACTGACAGGACAGGGCTAAAAGCCTATCTAGAAAGTTCTGCTGGCCCTTCTGGACTATACCACCGTTCTCTCCACTTCTGGCTGGAATGGGATCAGCTATACAC	1	+	chr2:93484533-93484652
ALX4	BA_678916_001461	GCTAAAAGCCTATCTAGAAAGTTCTGCTGGCCCTTCTGGACTATACCACCGTTCTCTCCACTTCTGGCTGGAATGGGATCAGCTATACACAGACACTCCTTCCATGTCCAGCTCCAGAAC	1	+	chr2:93484563-93484682
ALX4	BA_678916_001462	CCCTTCTGGACTATACCACCGTTCTCTCCACTTCTGGCTGGAATGGGATCAGCTATACACAGACACTCCTTCCATGTCCAGCTCCAGAACACAGGCCCTGTCACTTGTGAACACCAGGTG	1	+	chr2:93484593-93484712
ARHGAP5	BA_593036_007968	GAACCAATGAATTGGAGCAGATTTACTTATTTTTTTTCCTTCTAACATCTCCATTTAAAATTAGGGTGACCTTGGGAAAGTCACAAATAGTTCCTTCAGAGCTTAAAGGCCTTGATTTTC	1	+	chr12:53603868-53603987
ARHGAP5	BA_593036_007969	TTAGGGTGACCTTGGGAAAGTCACAAATAGTTCCTTCAGAGCTTAAAGGCCTTGATTTTCCTTCGTTCAAATTCTCTCTGCCTTTTCACGTCAATGCACAGATGAATAATAATACATAGA	1	+	chr12:53603928-53604047
ARHGAP5	BA_593036_007970	CTTCGTTCAAATTCTCTCTGCCTTTTCACGTCAATGCACAGATGAATAATAATACATAGAAAGCTCAACCAACGTACTCCCAAACGCGTAATTTCTAAGTCTCAAAAAAAGACCGAATGT	1	+	chr12:53603988-53604107
ARHGAP5	BA_593036_007971	AAGCTCAACCAACGTACTCCCAAACGCGTAATTTCTAAGTCTCAAAAAAAGACCGAATGTATTCTAAGGCAGTATCATGAAAGTCGGGAAACAGAGTTGGAAGTTGAGCTTATGGTGAGC	1	+	chr12:53604048-53604167
ARHGAP5	BA_593036_007972	ATTCTAAGGCAGTATCATGAAAGTCGGGAAACAGAGTTGGAAGTTGAGCTTATGGTGAGCCCTTGGGGCTACCCTAAACCATCTAAATCTTGGCGTGTGGCTCAACTTCCCTAAGAATAG	1	+	chr12:53604108-53604227
ARHGAP5	BA_593036_007973	CCTTGGGGCTACCCTAAACCATCTAAATCTTGGCGTGTGGCTCAACTTCCCTAAGAATAGCCAGGATCAAGGGCCTGCGTCTGTGTCGTGCCCACGGGGAAAGGACTCCTCTTGCTCACG	1	+	chr12:53604168-53604287
ARHGAP5	BA_593036_007974	CCAGGATCAAGGGCCTGCGTCTGTGTCGTGCCCACGGGGAAAGGACTCCTCTTGCTCACGACTAGCTCAGGCTTCTGTCTGAGTGGCTCCAGGTGCCGGAGAGCGACGCAGCTCAGGCAC	1	+	chr12:53604228-53604347
ARHGAP5	BA_593036_007975	ACTAGCTCAGGCTTCTGTCTGAGTGGCTCCAGGTGCCGGAGAGCGACGCAGCTCAGGCACATTCTTTCCTTTGCATTCTTCAGTGCCCAGAGACCTAAGACTCCAAGGGATTTATGGAGG	1	+	chr12:53604288-53604407
ARHGAP5	BA_593036_007976	ATTCTTTCCTTTGCATTCTTCAGTGCCCAGAGACCTAAGACTCCAAGGGATTTATGGAGGAACGATCGGCGCCCAAGCCATGCCTTGCAACGGCTAACACAACATTGAGTTCCTTTGCAG	1	+	chr12:53604348-53604467
ARHGAP5	BA_593036_007977	AACGATCGGCGCCCAAGCCATGCCTTGCAACGGCTAACACAACATTGAGTTCCTTTGCAGGACTCCGAGTTACGGCCAAATACCGAAGGAAGGCAAGGGAGAGGGGCAGGGAAGGCTCGG	1	+	chr12:53604408-53604527
ARHGAP5	BA_593036_007978	GACTCCGAGTTACGGCCAAATACCGAAGGAAGGCAAGGGAGAGGGGCAGGGAAGGCTCGGCGACCATGCTCGGCGTGAGGCGCCTGAAGCGTGGAGGATGGGACGGAGGAGGAGCGGAAC	2	+	chr12:53604468-53604587
ARHGAP5	BA_593036_007979	CGACCATGCTCGGCGTGAGGCGCCTGAAGCGTGGAGGATGGGACGGAGGAGGAGCGGAACGCGGAGAAAGGGGAGAGCGGAGGAAAACCACTCACGCCAATGGGTAACAGGGAAAAGGTG	1	+	chr12:53604528-53604647
ARHGAP5	BA_593036_007980	GCGGAGAAAGGGGAGAGCGGAGGAAAACCACTCACGCCAATGGGTAACAGGGAAAAGGTGAGAAGGAAGGGAGTAGGAGCGGGAGCCAATGGGTGGGAGAGGCGGAGAAAGGGGGAGGGG	1	+	chr12:53604588-53604707
ARHGAP5	BA_593036_007981	GCGGCAACTCGCGCCTCCTCGGCTCCCGGGAGACGAGGGCAGGGGCGGGGCCGAACCGGGATCGCGGCTCGGGAGGCGTCTGGAGGTGAGCGCCGCGGGGCGGGGGAATTCTGGGGCGGG	2	+	chr12:53604779-53604898
ARHGAP5	BA_593036_007982	CGCGCCGGGAGAGATGCTGAGGTAAAGTTCGGGAGAGAGAGAGGGAGAGATCCGTCAGCGCGAGGAGCCCGAGTGGCCGCCATTACTGAGCCCAGCGCGACGGCGGGCGCGGGGGAAGGG	2	+	chr12:53605015-53605134
ARHGAP5	BA_593036_007983	CGAGGAGCCCGAGTGGCCGCCATTACTGAGCCCAGCGCGACGGCGGGCGCGGGGGAAGGGGGGAGGGTCGGGGCTGCCGCTGCCGGCGAGCGGGCGGGTGACCGGGCAGCGCGAGCCGCG	2	+	chr12:53605075-53605194
ARHGAP5	BA_593036_007984	GGGAGGGTCGGGGCTGCCGCTGCCGGCGAGCGGGCGGGTGACCGGGCAGCGCGAGCCGCGGGGCTCGGGCTTTCGGGGCGTGTGTGTCGGCGAGGGCGCGGGGAGCGCGCCGGCCGCGAG	2	+	chr12:53605135-53605254
ARHGAP5	BA_593036_007985	GGGCTCGGGCTTTCGGGGCGTGTGTGTCGGCGAGGGCGCGGGGAGCGCGCCGGCCGCGAGAGGCGAGCCGAGAGTGGAGGAGGCGGCGGCGGCGGGAGCGCTCCCCAGGAATGTCGCTGC	2	+	chr12:53605195-53605314
ARHGAP5	BA_593036_007986	CCGCTGCCGTTGAGGAGGCGACGGAGGAGACCGGCGTTGTTAGGTAGGACCTCGGAGAGCCCGCTGCGCGGGGCCTGCCTCTCCCCTCCCGCCGGGGACCCTCGGTCGCCGCCGCCGCCG	2	+	chr12:53605332-53605451
ARHGAP5	BA_593036_007987	CCGCTGCGCGGGGCCTGCCTCTCCCCTCCCGCCGGGGACCCTCGGTCGCCGCCGCCGCCGCCGGTTGTAACCAGTTGAAGGGGCTGGGGCCGGGCGCCTGGGTCCTCACAGGCCGGGCCG	2	+	chr12:53605392-53605511
ARHGAP5	BA_593036_007988	CCGGTTGTAACCAGTTGAAGGGGCTGGGGCCGGGCGCCTGGGTCCTCACAGGCCGGGCCGCGGGGATACGGTCGGCTGAAGGGCAGAGAGGCCGGAGAGGGGGCCGCTTTCTCCACAGGT	2	+	chr12:53605452-53605571
ARHGAP5	BA_593036_007989	CGGGGATACGGTCGGCTGAAGGGCAGAGAGGCCGGAGAGGGGGCCGCTTTCTCCACAGGTGACCGGGCCGGGGGCGGCGGAGGCCTGCTGATCGCCGAGCTCGTGCCGGCCCCGCCAGGC	2	+	chr12:53605512-53605631
ARHGAP5	BA_593036_007990	GACCGGGCCGGGGGCGGCGGAGGCCTGCTGATCGCCGAGCTCGTGCCGGCCCCGCCAGGCGTCCTCTCCCCGCGCCGCCACCTTCACTTGTCCGGGGCTTGGAGGGTTGCGCGGGGAAGG	2	+	chr12:53605572-53605691
ARHGAP5	BA_593036_007991	GTCCTCTCCCCGCGCCGCCACCTTCACTTGTCCGGGGCTTGGAGGGTTGCGCGGGGAAGGAAGGTGGCGGGGTCGGCCGGCTGGGCTGCTGCTGCTGCTGCTAACGAGTTCCACCTGGAA	2	+	chr12:53605632-53605751
ARHGAP5	BA_593036_007992	AAGGTGGCGGGGTCGGCCGGCTGGGCTGCTGCTGCTGCTGCTAACGAGTTCCACCTGGAAGGGGGAGCGCGGTGGGCGCGGATCCGCAGACACAGGACCGCGGCTTGCAAACTTAACCGC	2	+	chr12:53605692-53605811
ARHGAP5	BA_593036_007993	GGGGGAGCGCGGTGGGCGCGGATCCGCAGACACAGGACCGCGGCTTGCAAACTTAACCGCCTTTCCGGGGGATCGGCCCTTTCACTTTTTTCTTATCTCCTCGGCTCCTCCCTAGGTTCG	1	+	chr12:53605752-53605871
ARHGAP5	BA_593036_007994	CTTTCCGGGGGATCGGCCCTTTCACTTTTTTCTTATCTCCTCGGCTCCTCCCTAGGTTCGCCACCACGTTCCCAGCTGCTAAAGCTTCGGGGTAAGGGAGTGAGAAGTTGCACTGCGCAA	1	+	chr12:53605812-53605931
ARHGAP5	BA_593036_007995	CCACCACGTTCCCAGCTGCTAAAGCTTCGGGGTAAGGGAGTGAGAAGTTGCACTGCGCAACCCAAACACGGGACTCCGTCCTGTCGTTTGACTGCTCCCAGGGTTGGGGCTTGGATCCCG	1	+	chr12:53605872-53605991
ARHGAP5	BA_593036_007996	CCCAAACACGGGACTCCGTCCTGTCGTTTGACTGCTCCCAGGGTTGGGGCTTGGATCCCGAGTTTCTGTTGGAATAACCTCTAAAAATTTCCCTCGGTTCCCAAGCAAAGAAAAGTATCG	1	+	chr12:53605932-53606051
ARHGAP5	BA_593036_007997	AGTTTCTGTTGGAATAACCTCTAAAAATTTCCCTCGGTTCCCAAGCAAAGAAAAGTATCGGGGTGGGGGTGGGGAGCAGCTCGGGAGCGCGCGTGCACTTCTCCACACATAAATACACTC	1	+	chr12:53605992-53606111
ARHGAP5	BA_593036_007998	GGGTGGGGGTGGGGAGCAGCTCGGGAGCGCGCGTGCACTTCTCCACACATAAATACACTCCCTCACACCCTCCCTCTCCAGCGTTATTGGGAATGCAAGTGAGGTGCAAGCTCTGGAGAA	1	+	chr12:53606052-53606171
ARHGAP5	BA_593036_007999	CCTCACACCCTCCCTCTCCAGCGTTATTGGGAATGCAAGTGAGGTGCAAGCTCTGGAGAAGCTGAGGCTGCAGGGTGCTAGAAAGTAAGGACAAACTATTAGAACGACTAATAAAATTCC	1	+	chr12:53606112-53606231
ARHGAP5	BA_593036_008000	GCTGAGGCTGCAGGGTGCTAGAAAGTAAGGACAAACTATTAGAACGACTAATAAAATTCCGAGAAAGTTGGAGGGGAGAAGTTCATACTTTTACCATAAGACGGGAATCCAGTTTGGGCC	1	+	chr12:53606172-53606291
ARHGAP5	BA_593036_008001	GAGAAAGTTGGAGGGGAGAAGTTCATACTTTTACCATAAGACGGGAATCCAGTTTGGGCCAGTGCTTAGTAAATAACAAGGAAACATACACTAAATCAAAACCAAGATAGTGAGATGAGA	1	+	chr12:53606232-53606351
ARHGAP5	BA_593036_008002	AGTGCTTAGTAAATAACAAGGAAACATACACTAAATCAAAACCAAGATAGTGAGATGAGAGGACTTCCTCAGCCATCTAACCTTATATGTCATCAGCTTATTTTTTCTTTGGGAAGGTAG	1	+	chr12:53606292-53606411
ARHGAP5	BA_593036_008003	GGACTTCCTCAGCCATCTAACCTTATATGTCATCAGCTTATTTTTTCTTTGGGAAGGTAGAAACTAAGGACATTTTTAAAAATGTTCAAGTAACGAAACATTTTTTTTTCTCTGTTTACT	1	+	chr12:53606352-53606471
ARHGAP5	BA_593036_008004	AAACTAAGGACATTTTTAAAAATGTTCAAGTAACGAAACATTTTTTTTTCTCTGTTTACTAGTGTTTGTGCATGTTGCCTTCCGCAGGTGTGTGAGGTGGGCATTGCCCATTTTACTTAA	1	+	chr12:53606412-53606531
ARHGAP5	BA_593036_008005	AGTGTTTGTGCATGTTGCCTTCCGCAGGTGTGTGAGGTGGGCATTGCCCATTTTACTTAAATCCAAAACCAATTTCCAGTTTGAACAGGATGTTAGGGATTGTTTAACAGCTTTGAGGAG	1	+	chr12:53606472-53606591
ASCL1	BA_593036_000319	ACTTGAGATGGACAAACTAACAACATAGTAACCTCCTCTCACCCCTGGGTTCCTGGAGACAGCCCCTACCTTCCGTGAACTCCCCCCTCCACACCGAAAAAGAAAAAGGGACCTAGTCAA	1	+	chr10:86954945-86955064
ASCL1	BA_593036_000320	AGCCCCTACCTTCCGTGAACTCCCCCCTCCACACCGAAAAAGAAAAAGGGACCTAGTCAAGAAAGGCTCTGCCCATCCCCACATGAAGCGTACCTGCTTCCAAAGTCCATTCCCAGGAGA	1	+	chr10:86955005-86955124
ASCL1	BA_593036_000321	GAAAGGCTCTGCCCATCCCCACATGAAGCGTACCTGCTTCCAAAGTCCATTCCCAGGAGAGCCTGGCAGGTCCTCAGAACCAGTTGGTAAAGTCCAGCAGCTCTTGTTCCTCTGGGCTAA	1	+	chr10:86955065-86955184
ASCL1	BA_593036_000322	GCCTGGCAGGTCCTCAGAACCAGTTGGTAAAGTCCAGCAGCTCTTGTTCCTCTGGGCTAAGAGGGTCGTAGGATCCCTCGTCGGAGGAGTAGGACGAGACCGGAGAACCCGCCATAGAGT	1	+	chr10:86955125-86955244
ASCL1	BA_593036_000323	GAGGGTCGTAGGATCCCTCGTCGGAGGAGTAGGACGAGACCGGAGAACCCGCCATAGAGTTCAAGTCGTTGGAGTAGTTGGGGGAGATGGTGGGCGACAGGACGCCCGCCTGAAAGGCAG	1	+	chr10:86955185-86955304
ASCL1	BA_593036_000324	TCAAGTCGTTGGAGTAGTTGGGGGAGATGGTGGGCGACAGGACGCCCGCCTGAAAGGCAGCGCTCACCGCGTCGTGCTCGTCCAGCAGCTGCTGCAGCGCGCGGATGTACTCGACCGCCG	2	+	chr10:86955245-86955364
ASCL1	BA_593036_000325	CGCTCACCGCGTCGTGCTCGTCCAGCAGCTGCTGCAGCGCGCGGATGTACTCGACCGCCGAGCGCAGCGTCTCCACCTTGCTCATCTTCTTGTTGGCCGCGCCGTTGGGGACATGCTCCC	2	+	chr10:86955305-86955424
ASCL1	BA_593036_000326	AGCGCAGCGTCTCCACCTTGCTCATCTTCTTGTTGGCCGCGCCGTTGGGGACATGCTCCCGGAGGGTGGCAAAACCCAGGTTGACCAACTTGACCCGGTTGCGCTCGCGCTCGTTGCGGC	1	+	chr10:86955365-86955484
ASCL1	BA_593036_000327	GGAGGGTGGCAAAACCCAGGTTGACCAACTTGACCCGGTTGCGCTCGCGCTCGTTGCGGCGCGCCACGGCGGCCGGCTGCTGCTGTGGCAGGCTGTAGCCGAAGCCGCTGAAGTTGAGCC	2	+	chr10:86955425-86955544
ASCL1	BA_593036_000328	GCGCCACGGCGGCCGGCTGCTGCTGTGGCAGGCTGTAGCCGAAGCCGCTGAAGTTGAGCCGGCGTTTGCAGCGCATCAGTTCCGGAGAGGACGAGCGCTGGCGCTTGACCTGCTTGGCCG	2	+	chr10:86955485-86955604
ASCL1	BA_593036_000329	GGCGTTTGCAGCGCATCAGTTCCGGAGAGGACGAGCGCTGGCGCTTGACCTGCTTGGCCGCTGACTTGTGACCGCCCCCTGAGGGCTGGCTGTCGGCCACCGGGCTCAGCTGCGGCGCCT	2	+	chr10:86955545-86955664
ASCL1	BA_593036_000330	CTGACTTGTGACCGCCCCCTGAGGGCTGGCTGTCGGCCACCGGGCTCAGCTGCGGCGCCTGCTGCGGCGGCGCCTGCGGCTGTTGCTGCTGCGCGCTCTGAGCTGCCGCGGCCGCCGCCG	2	+	chr10:86955605-86955724
ASCL1	BA_593036_000331	GCCGCGGTCGCAAAGAAGCAGGCTGCGGGAGGCAGGAAGGGCTGCGGGGGCTGCGGCTGCTGGCCGGCTCCACTCTCCATCTTGCCAGAGCTCTCCATGCCGGGCCAAACTGTCGCGGGG	2	+	chr10:86955736-86955855
ASCL1	BA_593036_000332	TGGCCGGCTCCACTCTCCATCTTGCCAGAGCTCTCCATGCCGGGCCAAACTGTCGCGGGGGAGAACGAGTTGGGGACGCAGGGTGCGCAGAGCCCTTGAAGGAAGCGGGGCTGCGAAGCA	2	+	chr10:86955796-86955915
ASCL1	BA_593036_000333	GAGAACGAGTTGGGGACGCAGGGTGCGCAGAGCCCTTGAAGGAAGCGGGGCTGCGAAGCACGATCAAAGGGGGACGAAGAAAAAGGAGAGGGGAGAAACGAGCCCCGGAGGAAAGTTAAA	1	+	chr10:86955856-86955975
ASCL1	BA_593036_000334	CGATCAAAGGGGGACGAAGAAAAAGGAGAGGGGAGAAACGAGCCCCGGAGGAAAGTTAAAGGGGAAGAAACGCGCAGAAGGAGGCAGAGTTGTCAGGCTGCAGCGGAGGAAGGTGCCTGG	1	+	chr10:86955916-86956035
ASCL1	BA_593036_000335	GGGGAAGAAACGCGCAGAAGGAGGCAGAGTTGTCAGGCTGCAGCGGAGGAAGGTGCCTGGGCGATCGTCTTCCCTCTGCGCCGCCTCCTCCCTCCCCTCCTCCCGCCGCGGTTGGCTTCG	2	+	chr10:86955976-86956095
ASCL1	BA_593036_000336	GCGATCGTCTTCCCTCTGCGCCGCCTCCTCCCTCCCCTCCTCCCGCCGCGGTTGGCTTCGGGAGCCTCGCGTGGCGCTCGCGTGTGCGGCCGCCGCCGGCGCCTTCTCGGTTTTAAAAGA	2	+	chr10:86956036-86956155
ASCL1	BA_593036_000337	GGAGCCTCGCGTGGCGCTCGCGTGTGCGGCCGCCGCCGGCGCCTTCTCGGTTTTAAAAGAGGAAAGGGAAAAGGAAAGCAGCCGCAAAAGTCAGTGCCGAGCGCACTCTGCCAGGTGGAG	1	+	chr10:86956096-86956215
ASCL1	BA_593036_000338	GGAAAGGGAAAAGGAAAGCAGCCGCAAAAGTCAGTGCCGAGCGCACTCTGCCAGGTGGAGCTGCTCCGGGGCTGCGCTTTCTTGCGCCCGCTCTCCCTTGCTCCAGCCTGGGCTTGAGCC	1	+	chr10:86956156-86956275
ASCL1	BA_593036_000339	CTGCTCCGGGGCTGCGCTTTCTTGCGCCCGCTCTCCCTTGCTCCAGCCTGGGCTTGAGCCTGCTTCTGGGATTATTTGGTTGAACCCCCTTTCTTTCTAATTGCTCTCTCGTTCCCCCCA	1	+	chr10:86956216-86956335
ASCL1	BA_593036_000340	TGCTTCTGGGATTATTTGGTTGAACCCCCTTTCTTTCTAATTGCTCTCTCGTTCCCCCCAATTCGCCCTCCCTAACCGGCTCCCAGCCGGTACGCCTTCCACGTTCCCTGGCCAGAAGTG	1	+	chr10:86956276-86956395
ASCL1	BA_593036_000341	ATTCGCCCTCCCTAACCGGCTCCCAGCCGGTACGCCTTCCACGTTCCCTGGCCAGAAGTGAGAGACTGCTGGGCGGCTGCGGTGCGGCCGCCTTTTCAATGGGACACCCAGCCCCACGCG	2	+	chr10:86956336-86956455
ASCL1	BA_593036_000342	AGAGACTGCTGGGCGGCTGCGGTGCGGCCGCCTTTTCAATGGGACACCCAGCCCCACGCGCAGCCCTGGCCCCGCCTCGCCCCCCACTCCCCGCTGCTGCAGCGAGCGGCTGCAGCCCCC	2	+	chr10:86956396-86956515
ASCL1	BA_593036_000343	CCCCCCCTCCAGTTGCCCGCGCCCGCTCCTTGCAAACTCTCCATTCAGCCTGGTTTGTTGTTGCAGTGCGTGCGCCCGGCGCGTGCCGGACTCCCGGCTGAATAAACAGGCCGCGCGCTC	2	+	chr10:86956564-86956683
ASCL1	BA_593036_000344	TTGCAGTGCGTGCGCCCGGCGCGTGCCGGACTCCCGGCTGAATAAACAGGCCGCGCGCTCGGGGCGGTGGCTCCGGGAGCCAGGGGGTGGCTCTAGAAATGGGGGCCTTTTTAAAAAAGG	2	+	chr10:86956624-86956743
ASCL1	BA_593036_000345	GGGGCGGTGGCTCCGGGAGCCAGGGGGTGGCTCTAGAAATGGGGGCCTTTTTAAAAAAGGGGGGGGGCAAATAACTCCTGGACTTGGGGTGCCTAGGTGGAAAGTCTGGAGGGAAAAGTG	1	+	chr10:86956684-86956803
ASCL1	BA_593036_000346	GGGGGGGCAAATAACTCCTGGACTTGGGGTGCCTAGGTGGAAAGTCTGGAGGGAAAAGTGTCTTTGGAGTCTCCTGAGAACTTGGAAGAAAATTCAGGGAAGGGTTTAGGCAGAAAAAGT	1	+	chr10:86956744-86956863
ASCL1	BA_593036_000347	TCTTTGGAGTCTCCTGAGAACTTGGAAGAAAATTCAGGGAAGGGTTTAGGCAGAAAAAGTGGCAAAGGGAACTCTTGGAAGTGGAGGGCTGGGCTTCTGCTTCCCCCCTTTCTTCTCTCC	1	+	chr10:86956804-86956923
ASCL1	BA_593036_000348	GGCAAAGGGAACTCTTGGAAGTGGAGGGCTGGGCTTCTGCTTCCCCCCTTTCTTCTCTCCGCAGTAACTCCGGAGGATTCTTTGTGACCCTAAAAAATAAAATGTTTGCCATTAGGTTTA	1	+	chr10:86956864-86956983
ASCL1	BA_593036_000349	GCAGTAACTCCGGAGGATTCTTTGTGACCCTAAAAAATAAAATGTTTGCCATTAGGTTTAGGAAGGTAGGAGGGGAGAGCGTTTGCACACTAGTGGTCTCTCTGTATGAGAACTTGAGTC	1	+	chr10:86956924-86957043
ASCL1	BA_593036_000350	GGAAGGTAGGAGGGGAGAGCGTTTGCACACTAGTGGTCTCTCTGTATGAGAACTTGAGTCCTCTCACTAGCTTTGTGGTCTCAGTAAGTTCTACCCTGTCTGAGCAGCCTTTCCCTCTGC	1	+	chr10:86956984-86957103
ASCL1	BA_593036_000351	CTCTCACTAGCTTTGTGGTCTCAGTAAGTTCTACCCTGTCTGAGCAGCCTTTCCCTCTGCAGCCATATGGGGTTGCCACTGCTGTTCCATTCAGCTTCAAGGATTGGATGTGCTGGGCAC	1	+	chr10:86957044-86957163
ASCL1	BA_593036_000352	AGCCATATGGGGTTGCCACTGCTGTTCCATTCAGCTTCAAGGATTGGATGTGCTGGGCACAACTCGCTAAGGGTGGGAAGGATAGGGAGTCATGAACAGGATAGGTTGACAGTTCCCTAA	1	+	chr10:86957104-86957223
ASCL1	BA_593036_000353	AACTCGCTAAGGGTGGGAAGGATAGGGAGTCATGAACAGGATAGGTTGACAGTTCCCTAAGAAGCTGAGGCAGGAGAATAAGTTGGAGGCTAGCTTTTGTGAGACACAGTGGTGTGGGGA	1	+	chr10:86957164-86957283
ASCL1	BA_593036_000354	GAAGCTGAGGCAGGAGAATAAGTTGGAGGCTAGCTTTTGTGAGACACAGTGGTGTGGGGAAGTGTATGCAGGAAGGCACTCAGGGTTATCTGTTTCTGGCCCTCTATAACAGCCGCCACT	1	+	chr10:86957224-86957343
ASCL1	BA_593036_000355	AGTGTATGCAGGAAGGCACTCAGGGTTATCTGTTTCTGGCCCTCTATAACAGCCGCCACTCCTCTGAAAGATGCTTGCTAGACGCTATGGGAAAGGAGGGCATTCTGGGATATTTCAGAT	1	+	chr10:86957284-86957403
ASCL1	BA_593036_000356	CCTCTGAAAGATGCTTGCTAGACGCTATGGGAAAGGAGGGCATTCTGGGATATTTCAGATCTTCTGGAGAAAGAAGCTGTGGGCTGTGTGGAATAAAGAGTGACTGGATTTGAGCTAACT	1	+	chr10:86957344-86957463
ASCL1	BA_593036_000357	CTTCTGGAGAAAGAAGCTGTGGGCTGTGTGGAATAAAGAGTGACTGGATTTGAGCTAACTGAAAGTCTTCCCTCCTTGTCCCTCCCTGTCTCAGGCGCCTTGGAGGCCTTGGCGCAGCCT	1	+	chr10:86957404-86957523
ASCL1	BA_593036_000358	GAAAGTCTTCCCTCCTTGTCCCTCCCTGTCTCAGGCGCCTTGGAGGCCTTGGCGCAGCCTCTATCCCGCCCCAGGCGTGTGCCTGGCGGACCGGTGGCAGGCGACTGGGAGCGGAGCCCG	2	+	chr10:86957464-86957583
ASCL1	BA_593036_000359	CTATCCCGCCCCAGGCGTGTGCCTGGCGGACCGGTGGCAGGCGACTGGGAGCGGAGCCCGCTGAGGCCGTGTGCTGGCACCGCGAGAGAAGGGGAGGTGCCTGCAGCGGTCACCGGGCTG	2	+	chr10:86957524-86957643
ATF2	BA_593036_002764	AAGTGATACCAGTTCACAGAAACACATATCATTTTGGAAGAGACTAAAGTCAAAAATGAGTGGAAACAGCATGTAAGGTAAAGTTATTTACTAGATCTAGCAATATAATTGATTAGGAGA	1	+	chr2:73728807-73728926
ATF2	BA_593036_002765	TGGAAACAGCATGTAAGGTAAAGTTATTTACTAGATCTAGCAATATAATTGATTAGGAGAGTACAGATAATAATTAAAACTCAAGTTTTCAAGTTTTCTTAAAAATAAAAAAAAACAAAA	1	+	chr2:73728867-73728986
ATF2	BA_593036_002766	GTACAGATAATAATTAAAACTCAAGTTTTCAAGTTTTCTTAAAAATAAAAAAAAACAAAAACAAACCTAGATTTCTTGACTTAATGTTAGTCATGAAATATTTAATGGATAGTATCATTT	1	+	chr2:73728927-73729046
ATF2	BA_593036_002767	ACAAACCTAGATTTCTTGACTTAATGTTAGTCATGAAATATTTAATGGATAGTATCATTTCAAAACAATATAGCTTTAAAATTTTAAAATACCCATGAAAACATCTCTAAACATCTCTCC	1	+	chr2:73728987-73729106
ATF2	BA_593036_002768	CAAAACAATATAGCTTTAAAATTTTAAAATACCCATGAAAACATCTCTAAACATCTCTCCAATTATTTATTAATGATTTTAAGACCTAGAACCTTAATTATCACTCAACTATCGATGGCC	1	+	chr2:73729047-73729166
ATF2	BA_593036_002769	AATTATTTATTAATGATTTTAAGACCTAGAACCTTAATTATCACTCAACTATCGATGGCCTTAAAGATCCATGTACTTAGTTTTCTTGGCTTATATAGGATATGTTTTTAGCATACTCTA	1	+	chr2:73729107-73729226
ATF2	BA_593036_002770	TTAAAGATCCATGTACTTAGTTTTCTTGGCTTATATAGGATATGTTTTTAGCATACTCTACAAAATATTTCTATACTTTTGAAAAAAGTTTATTGCAGGGATTCTTCAAATAGGTTTAGC	1	+	chr2:73729167-73729286
ATF2	BA_593036_002771	CAAAATATTTCTATACTTTTGAAAAAAGTTTATTGCAGGGATTCTTCAAATAGGTTTAGCAAATTTAAATACAAGACTCTTATTTCATCTAGAGTTAACTGTTTTAAAATAAGCCTTTAT	1	+	chr2:73729227-73729346
ATF2	BA_593036_002772	AAATTTAAATACAAGACTCTTATTTCATCTAGAGTTAACTGTTTTAAAATAAGCCTTTATAAAGTCTTACCATTTGGGTGCTAGAGACCCAGGCCATTTGGCGCTAAATGAGTAGTATTC	1	+	chr2:73729287-73729406
ATF2	BA_593036_002773	AAAGTCTTACCATTTGGGTGCTAGAGACCCAGGCCATTTGGCGCTAAATGAGTAGTATTCCTGGAACGGTTATTACTTGACAATGGCCAAGGGTTAAGAATTTCTTCAAACAGGACAAAC	1	+	chr2:73729347-73729466
ATF2	BA_593036_002774	CTGGAACGGTTATTACTTGACAATGGCCAAGGGTTAAGAATTTCTTCAAACAGGACAAACTGAGCTCAGAACAGTCCGTGTTTGGTCAGATGTTAAAAACAGCATTACCTGCATCTGGTG	1	+	chr2:73729407-73729526
ATF2	BA_593036_002775	TGAGCTCAGAACAGTCCGTGTTTGGTCAGATGTTAAAAACAGCATTACCTGCATCTGGTGTGAACGTGTCCCTAGTTTATAATCCCCAAGAAACTGTGACTTCCACAAGGTAAACTAGGT	1	+	chr2:73729467-73729586
ATF2	BA_593036_002776	TGAACGTGTCCCTAGTTTATAATCCCCAAGAAACTGTGACTTCCACAAGGTAAACTAGGTATTAGTCGATGGGCCTAGAGTCTATCATGAGTATCCCTTTTACTCAATTATACTGGTGGT	1	+	chr2:73729527-73729646
ATF2	BA_593036_002777	ATTAGTCGATGGGCCTAGAGTCTATCATGAGTATCCCTTTTACTCAATTATACTGGTGGTAGTTTTACTCGACCTTCCCAGTTTAAGAGTCTCCATTAAAGAAGAGACAATTTTATAATA	1	+	chr2:73729587-73729706
ATF2	BA_593036_002778	AGTTTTACTCGACCTTCCCAGTTTAAGAGTCTCCATTAAAGAAGAGACAATTTTATAATACCTATGTGCATAAAAATAGTTCCCATCTCCTCCAAGGTCTGGTTCAATGAGTGAGCATCC	1	+	chr2:73729647-73729766
ATF2	BA_593036_002779	CCTATGTGCATAAAAATAGTTCCCATCTCCTCCAAGGTCTGGTTCAATGAGTGAGCATCCCGGGGAGACATACACACATCTCTCCCTACCTCTCTTCCTTGTCCCTGGGGTAATAAAAGG	1	+	chr2:73729707-73729826
ATF2	BA_593036_002780	CGGGGAGACATACACACATCTCTCCCTACCTCTCTTCCTTGTCCCTGGGGTAATAAAAGGCACAGATTATTTTCCTACAAAAGCTCTGCAGAACACCGGTCGAAGTAAATGGGGTGTGGG	1	+	chr2:73729767-73729886
ATF2	BA_593036_002781	CACAGATTATTTTCCTACAAAAGCTCTGCAGAACACCGGTCGAAGTAAATGGGGTGTGGGGGGGAATAGCAGAATCAACCTGCACCCACACCTCAGCCCCGCCCCACCTGGAAAGGGGGG	1	+	chr2:73729827-73729946
ATF2	BA_593036_002782	GGGGAATAGCAGAATCAACCTGCACCCACACCTCAGCCCCGCCCCACCTGGAAAGGGGGGGGTGGCGGCGGCGGGAGTGTGAGGGCGGCAGAAAGGACAGAAAAGGCCGAGACCACCAGC	2	+	chr2:73729887-73730006
ATF2	BA_593036_002783	GGTGGCGGCGGCGGGAGTGTGAGGGCGGCAGAAAGGACAGAAAAGGCCGAGACCACCAGCAGGTTCTCCATTACCATTGGCTCCATCACGTTCCACCGAGGCCAGAGACCCTTGCTTCCC	1	+	chr2:73729947-73730066
ATF2	BA_593036_002784	AGGTTCTCCATTACCATTGGCTCCATCACGTTCCACCGAGGCCAGAGACCCTTGCTTCCCAATCCTTCAACGCACCATCCCAAACCCTCGATCGCCCGAGTCCCCGGTGGGGAGCCCAGC	1	+	chr2:73730007-73730126
ATF2	BA_593036_002785	AATCCTTCAACGCACCATCCCAAACCCTCGATCGCCCGAGTCCCCGGTGGGGAGCCCAGCGTGGGCCCTCTGGGCAGCGCGATCAAGGACTAGCGGCGGGGGTCTCCCCGACAGATGGGC	2	+	chr2:73730067-73730186
ATF2	BA_593036_002786	GTGGGCCCTCTGGGCAGCGCGATCAAGGACTAGCGGCGGGGGTCTCCCCGACAGATGGGCGGATCCGAAGGGCGCCTCGGGGACCTCTCAAGTGACCACACCAGAGGAGAAGTCGGAGGG	2	+	chr2:73730127-73730246
ATF2	BA_593036_002787	GGATCCGAAGGGCGCCTCGGGGACCTCTCAAGTGACCACACCAGAGGAGAAGTCGGAGGGAGGGGTCGGAGAAGAGCCGTTATTCCTTCTCGCTCAGGCTTGGGAAAGCGCGCGAGGGAG	1	+	chr2:73730187-73730306
ATF2	BA_593036_002788	AGGGGTCGGAGAAGAGCCGTTATTCCTTCTCGCTCAGGCTTGGGAAAGCGCGCGAGGGAGGGGCCGGCCGGAGCCGCAGCGCGTTACCTAACGGTCCGGTCGCTCCGCCAGACCAGAGGC	2	+	chr2:73730247-73730366
ATF2	BA_593036_002789	GGGCCGGCCGGAGCCGCAGCGCGTTACCTAACGGTCCGGTCGCTCCGCCAGACCAGAGGCGGCAACGCGGCCACCGCCGTCCGTAGGGTTGGGGTCCACAGCAGGGGCGCAAAAGGGGTG	2	+	chr2:73730307-73730426
ATF2	BA_593036_002790	GGCAACGCGGCCACCGCCGTCCGTAGGGTTGGGGTCCACAGCAGGGGCGCAAAAGGGGTGGGAGGCGGGGGGTGGAGACTACAGGCAGCGACGTCGCCATGTTAGCACCTTCTTCCTCTG	2	+	chr2:73730367-73730486
ATF2	BA_593036_002791	GGAGGCGGGGGGTGGAGACTACAGGCAGCGACGTCGCCATGTTAGCACCTTCTTCCTCTGCATCCCTACAACCTCCAAGCCCGTGGCCCTTCCACCATTACTCACCTTTCCAGGTCACTA	1	+	chr2:73730427-73730546
ATF2	BA_593036_002792	CATCCCTACAACCTCCAAGCCCGTGGCCCTTCCACCATTACTCACCTTTCCAGGTCACTAATTCATGGTCCTGCCAGCCACCCGCGAGCCCGGAGGCCGGCCGTGTTTACAAACTAGCCC	1	+	chr2:73730487-73730606
ATF2	BA_593036_002793	ATTCATGGTCCTGCCAGCCACCCGCGAGCCCGGAGGCCGGCCGTGTTTACAAACTAGCCCCGGAGGAGAGGGCTGAATCGCACTTTAAAGGCCACGGGCTCCCACAGGCTTCCGTCCTCT	1	+	chr2:73730547-73730666
ATF2	BA_593036_002794	CGGAGGAGAGGGCTGAATCGCACTTTAAAGGCCACGGGCTCCCACAGGCTTCCGTCCTCTCTCGCGAGATCCGACTGACAAACCTTCTCCCCGCCCCACTCCCGGCATCCCTGCCGCTTT	1	+	chr2:73730607-73730726
ATF2	BA_593036_002795	CTCGCGAGATCCGACTGACAAACCTTCTCCCCGCCCCACTCCCGGCATCCCTGCCGCTTTCTTCTTGCGCCCCTCCCCTTCACGCACACGCCCCTTCCTGCTTTCCACCGAGGGAGCGCC	2	+	chr2:73730667-73730786
ATF2	BA_593036_002796	CTTCTTGCGCCCCTCCCCTTCACGCACACGCCCCTTCCTGCTTTCCACCGAGGGAGCGCCCGCGGGTCAGGTGACTCCGTCGTGCCTCGGAAAAAGGGCGGGTCTTCAGGAGGGCGGGGG	2	+	chr2:73730727-73730846
ATF2	BA_593036_002797	CGCGGGTCAGGTGACTCCGTCGTGCCTCGGAAAAAGGGCGGGTCTTCAGGAGGGCGGGGGCGGGGAGGCGGGAACCAAAGAACACTCGGACGCGAGTGATTGGGCGAAAAGCACGAAAGG	2	+	chr2:73730787-73730906
ATF2	BA_593036_002798	CGGGGAGGCGGGAACCAAAGAACACTCGGACGCGAGTGATTGGGCGAAAAGCACGAAAGGCGGGAAGCAGGTCCAAAGGGGCGTGGCCAAGGTGCCCAAGGACCGTTGTTTCGGTAACCA	1	+	chr2:73730847-73730966
ATF2	BA_593036_002799	CGGGAAGCAGGTCCAAAGGGGCGTGGCCAAGGTGCCCAAGGACCGTTGTTTCGGTAACCAGGGAACTGCAGAAAGCTGTGATTGGCAGCCGTCGGGAGGCGGGCACGAGAAGCTGCACCG	1	+	chr2:73730907-73731026
ATF2	BA_593036_002800	GGGAACTGCAGAAAGCTGTGATTGGCAGCCGTCGGGAGGCGGGCACGAGAAGCTGCACCGGATCTGGGGCGCGCGCGCAGGTGGCGGAGGAGCGAGCAGGAGGGCGTGGGCGGTGTGAGA	2	+	chr2:73730967-73731086
ATF2	BA_593036_002801	GATCTGGGGCGCGCGCGCAGGTGGCGGAGGAGCGAGCAGGAGGGCGTGGGCGGTGTGAGAGAAGAAAGGTGAGGTCGGGGAGCCTAAAGGAGCCCAGCCCTGGCGCCGGATGTCTCTGTC	2	+	chr2:73731027-73731146
ATF2	BA_593036_002802	GAAGAAAGGTGAGGTCGGGGAGCCTAAAGGAGCCCAGCCCTGGCGCCGGATGTCTCTGTCGTATTGGTTTCTGACTTCGCTAGGGATATGAGACTATGAAGGGAGAAGCGCTTCTGGACC	1	+	chr2:73731087-73731206
ATF2	BA_593036_002803	GTATTGGTTTCTGACTTCGCTAGGGATATGAGACTATGAAGGGAGAAGCGCTTCTGGACCACTCTCCGTGTACCGAGAAGCCAGAGCTGGAGAGAGAGCTACGCTTAAGGTTTTGGAGAG	1	+	chr2:73731147-73731266
ATF2	BA_593036_002804	ACTCTCCGTGTACCGAGAAGCCAGAGCTGGAGAGAGAGCTACGCTTAAGGTTTTGGAGAGTCGGGGTTTGCCAGTCATCACCTCCGCCCCCATGTGCACACTGAAGCAAAATAAGTCAGC	1	+	chr2:73731207-73731326
ATF2	BA_593036_002805	TCGGGGTTTGCCAGTCATCACCTCCGCCCCCATGTGCACACTGAAGCAAAATAAGTCAGCCCTGCGTAGAAAATAGAAACCTTTTCTTAGAGAGTTCTTTGTTCGGATTTTACTAAGCCA	1	+	chr2:73731267-73731386
ATF2	BA_593036_002806	CCTGCGTAGAAAATAGAAACCTTTTCTTAGAGAGTTCTTTGTTCGGATTTTACTAAGCCAGAACTGGAGCCGATCTTCCCCACCACCCTATGTCAAGTATATGGTATATTACATACGAGT	1	+	chr2:73731327-73731446
ATF2	BA_593036_002807	GAACTGGAGCCGATCTTCCCCACCACCCTATGTCAAGTATATGGTATATTACATACGAGTATGTTCAAAGGCAGTGATCAAAAGGAAATACACCGTCTTCCACCCCCATGTCACCATATT	1	+	chr2:73731387-73731506
ATF2	BA_593036_002808	ATGTTCAAAGGCAGTGATCAAAAGGAAATACACCGTCTTCCACCCCCATGTCACCATATTTTAAAACAAAGCAACGATCTTTTTCCTAGAGAAAAATTCTTGTAATTATGAGTGTTTCTT	1	+	chr2:73731447-73731566
ATF2	BA_593036_002809	TTAAAACAAAGCAACGATCTTTTTCCTAGAGAAAAATTCTTGTAATTATGAGTGTTTCTTTTATCAAATTTCCTTTACTTAGTTAGATATAAAAATACAAATTTCAGGGACCGAAGAGAT	1	+	chr2:73731507-73731626
ATF4	BA_593036_004788	TGAGGAAGGAGGATGGAGTTAGGGATATAGGGACTGGAGAGTTAGGTTCGAATTAATAAATAGCAATCAATCATATAATCAAGGACGACCTTGAACTATGGTACCCGAGCGCTAGGGTTG	1	+	chr15:80084607-80084726
ATF4	BA_593036_004789	TAGCAATCAATCATATAATCAAGGACGACCTTGAACTATGGTACCCGAGCGCTAGGGTTGGGTTGTACAAGGCTTGCAAATAATCACTGAGCAGTAAGTGGCAGGCACTGTGCCAGTTGA	1	+	chr15:80084667-80084786
ATF4	BA_593036_004790	GGTTGTACAAGGCTTGCAAATAATCACTGAGCAGTAAGTGGCAGGCACTGTGCCAGTTGAGTGGTATTTGTGTGAGTCACTTAAACAGAAGTGGAAACTCTTTTTAAGATTTCCAGGCTG	1	+	chr15:80084727-80084846
ATF4	BA_593036_004791	GTGGTATTTGTGTGAGTCACTTAAACAGAAGTGGAAACTCTTTTTAAGATTTCCAGGCTGGAGTTGGAAAGAGCCTCTCAGCACTCTCAAAACAGCATCCTTTATGGTGAGGCCTTGACC	1	+	chr15:80084787-80084906
ATF4	BA_593036_004792	GAGTTGGAAAGAGCCTCTCAGCACTCTCAAAACAGCATCCTTTATGGTGAGGCCTTGACCAGTACCTGGGGCTCCCGATCACTTAGGCGGCAGGCTCACTCATCAGGATGACTTCTTGGG	1	+	chr15:80084847-80084966
ATF4	BA_593036_004793	AGTACCTGGGGCTCCCGATCACTTAGGCGGCAGGCTCACTCATCAGGATGACTTCTTGGGAAGGTGATACCTGGAAGTTAAGGCTTGAGAGCCAACTGAATAAACCTGATCTTAAGGGAA	1	+	chr15:80084907-80085026
ATF4	BA_593036_004794	AAGGTGATACCTGGAAGTTAAGGCTTGAGAGCCAACTGAATAAACCTGATCTTAAGGGAACTGACCCTATACAAACCGGCAGTGAGGGCCTCTATGATGGGAGGATGGGCATAGGAGGTT	1	+	chr15:80084967-80085086
ATF4	BA_593036_004795	CTGACCCTATACAAACCGGCAGTGAGGGCCTCTATGATGGGAGGATGGGCATAGGAGGTTAGACCTGAGGTTAGGCATGTTTCCCCGGTTCAGGGGAAATCGCTGAACTGGAGGAACCGG	1	+	chr15:80085027-80085146
ATF4	BA_593036_004796	AGACCTGAGGTTAGGCATGTTTCCCCGGTTCAGGGGAAATCGCTGAACTGGAGGAACCGGAATATCTCCCAAGAAGACCCCAACACGAACGCCCTGCCTCCAAGTGCCGTCCCTGTCCCA	1	+	chr15:80085087-80085206
ATF4	BA_593036_004797	AATATCTCCCAAGAAGACCCCAACACGAACGCCCTGCCTCCAAGTGCCGTCCCTGTCCCAGGACTGACAGGAAGCTGAAGGTTTGGACCAGCTAACTCAGAAGGGTCTCTCCACATGCCT	1	+	chr15:80085147-80085266
ATF4	BA_593036_004798	GGACTGACAGGAAGCTGAAGGTTTGGACCAGCTAACTCAGAAGGGTCTCTCCACATGCCTGAAGCCTGCCCACTCGGTTCTGGAAACAACAAATACATGAAAAGATGGCTTCCAGCCCAA	1	+	chr15:80085207-80085326
ATF4	BA_593036_004799	GAAGCCTGCCCACTCGGTTCTGGAAACAACAAATACATGAAAAGATGGCTTCCAGCCCAAAGGTCACGCCTGGAAGCTGTTTGCTCGGTGCGGAGCGATGCCGGAGAGAGCAAATACACA	1	+	chr15:80085267-80085386
ATF4	BA_593036_004800	AGGTCACGCCTGGAAGCTGTTTGCTCGGTGCGGAGCGATGCCGGAGAGAGCAAATACACATGGATCACATCTGACAAGAGATGGCAGGTGTGACAGTCTGGCGCCCGGAACCTCTGGTGG	1	+	chr15:80085327-80085446
ATF4	BA_593036_004801	TGGATCACATCTGACAAGAGATGGCAGGTGTGACAGTCTGGCGCCCGGAACCTCTGGTGGCTCCTCCCTTTCCACGCAGACCCCTGATCCTAGAGCGCCCAGGTGCAGAGCCAATAGGAA	1	+	chr15:80085387-80085506
ATF4	BA_593036_004802	CTCCTCCCTTTCCACGCAGACCCCTGATCCTAGAGCGCCCAGGTGCAGAGCCAATAGGAACTTGAGGTTTAGGTGACTCGCCACGCCTGGGCCAATCAGCTCGACGCGCGCTCCGACGGC	1	+	chr15:80085447-80085566
ATF4	BA_593036_004803	CTTGAGGTTTAGGTGACTCGCCACGCCTGGGCCAATCAGCTCGACGCGCGCTCCGACGGCGTCTCGCGTGATAACCTGGCAGCTTCGGCTTTGACCGTCAGAGCTTTGGCTAGGTGTCCC	1	+	chr15:80085507-80085626
ATF4	BA_593036_004804	GTCTCGCGTGATAACCTGGCAGCTTCGGCTTTGACCGTCAGAGCTTTGGCTAGGTGTCCCACCCCGCCTTGTAAGACACCGGAAATTCGTCAACGAGCGATCCCTCCGCGCTCCGGAACC	1	+	chr15:80085567-80085686
ATF4	BA_593036_004805	ACCCCGCCTTGTAAGACACCGGAAATTCGTCAACGAGCGATCCCTCCGCGCTCCGGAACCAGACCGCGGCTGGTCGTCAACCTATAAAGTAGTGCACTTTTCTCTCATGGGGCCTTTAGG	1	+	chr15:80085627-80085746
ATF4	BA_593036_004806	AGACCGCGGCTGGTCGTCAACCTATAAAGTAGTGCACTTTTCTCTCATGGGGCCTTTAGGACGATCTCTAACGCCACAGTTACCCCCCGAGCACAGCGGAGAAGGGTTGGGGCGGGCGAG	1	+	chr15:80085687-80085806
ATF4	BA_593036_004807	ACGATCTCTAACGCCACAGTTACCCCCCGAGCACAGCGGAGAAGGGTTGGGGCGGGCGAGGGCGTCAGTGAGAGGCGGTTTGGTGGCGCTGCGGTAGGATCACGTGACCACAGTGGGAGG	2	+	chr15:80085747-80085866
ATF4	BA_593036_004808	GGCGTCAGTGAGAGGCGGTTTGGTGGCGCTGCGGTAGGATCACGTGACCACAGTGGGAGGATACGCGGTGTGCTGCGTCCCTGGCCGAGGCTATAAAGGGCGGGTTTAGGGCGTGCCGCC	2	+	chr15:80085807-80085926
ATF4	BA_593036_004809	ATACGCGGTGTGCTGCGTCCCTGGCCGAGGCTATAAAGGGCGGGTTTAGGGCGTGCCGCCGCCATTTCTGCTTGCTGTCTGCCGGTTTAAGTTGTGTGCTCGGGTGTCCCTTTCCTCTTC	1	+	chr15:80085867-80085986
ATF4	BA_593036_004810	GCCATTTCTGCTTGCTGTCTGCCGGTTTAAGTTGTGTGCTCGGGTGTCCCTTTCCTCTTCCCCTCCCGCAGGGCTTGCGGCCACCATGGCGTATTAGAGGCAGCAGTGCCTGCGGCAGCG	1	+	chr15:80085927-80086046
ATF4	BA_593036_004811	CCCTCCCGCAGGGCTTGCGGCCACCATGGCGTATTAGAGGCAGCAGTGCCTGCGGCAGCGTTGGCCTTTGCAGCGGCGGCAGCAGCACCAGGCTCTGCAGCGGCAACCCCCACCGGCCTA	2	+	chr15:80085987-80086106
ATF4	BA_593036_004812	TTGGCCTTTGCAGCGGCGGCAGCAGCACCAGGCTCTGCAGCGGCAACCCCCACCGGCCTAAGCCATGGCGTGAGTATGGGGCCGGCCGCGGAGGGCGGGGGCCTCGCTGTGGTTGGGTGC	2	+	chr15:80086047-80086166
ATF4	BA_593036_004813	AGCCATGGCGTGAGTATGGGGCCGGCCGCGGAGGGCGGGGGCCTCGCTGTGGTTGGGTGCGGCCCGGGCGCGGTGGCCGGCACACGCGGTTTTACAAGCGGCCGGACGCGTCGGCCTTGT	2	+	chr15:80086107-80086226
ATF4	BA_593036_004814	GGCCCGGGCGCGGTGGCCGGCACACGCGGTTTTACAAGCGGCCGGACGCGTCGGCCTTGTTTGCGTTGCCTGCGACGCCGGCGCTCCCGGGCAGAGCTGGGCGGAGGAGTGTCTAAAGCG	2	+	chr15:80086167-80086286
ATF4	BA_593036_004815	TTGCGTTGCCTGCGACGCCGGCGCTCCCGGGCAGAGCTGGGCGGAGGAGTGTCTAAAGCGCTACTGCTGCCCCTTCGTCCTGTCTTAGCTTAATCATCTCGGGCTCACCGGGGTCCCCGT	2	+	chr15:80086227-80086346
ATF4	BA_593036_004816	CTACTGCTGCCCCTTCGTCCTGTCTTAGCTTAATCATCTCGGGCTCACCGGGGTCCCCGTGTCATCCTGCGAACGTGGCGATGCCCAAGATGGCGGTGGGGCGGGGGTGTGAGTCACGGG	1	+	chr15:80086287-80086406
ATF4	BA_593036_004817	GGCGGCCTTGGCCGTATTAGGACGCGAGGACAAGCTGCTTCCTCTGGGTGGCCGGTGAAGCAAAGCTAAGCCTCCATCTTGTGCAACCCGAGCTGGCGGCCGGGGAGGCTTACACAATGG	1	+	chr15:80086417-80086536
ATF4	BA_593036_004818	CAAAGCTAAGCCTCCATCTTGTGCAACCCGAGCTGGCGGCCGGGGAGGCTTACACAATGGCCTTGGGCCCGCGTGCTCTCCCTGTAGACGCTTCTGGGATTTGGCCATCCGGCATCTTAG	1	+	chr15:80086477-80086596
ATF4	BA_593036_004819	CCTTGGGCCCGCGTGCTCTCCCTGTAGACGCTTCTGGGATTTGGCCATCCGGCATCTTAGATAGAAAGATGACTGGACTTGCTTTTGGGTCCCCATCCAGGCTCTTCACGAAATCCAGCA	1	+	chr15:80086537-80086656
ATF4	BA_593036_004820	ATAGAAAGATGACTGGACTTGCTTTTGGGTCCCCATCCAGGCTCTTCACGAAATCCAGCAGCAGTGTTGCTGTAACGGACAAAGATACCTTCGAGTTAAGCACATTCCTCGAATCCAGCA	1	+	chr15:80086597-80086716
ATF4	BA_593036_004821	GCAGTGTTGCTGTAACGGACAAAGATACCTTCGAGTTAAGCACATTCCTCGAATCCAGCAAAGCCCCACAACATGACCGAGATGAGCTTCCTGAACAGCGAAGTGTTGGCGGGGGACTTG	1	+	chr15:80086657-80086776
ATF4	BA_593036_004822	AAGCCCCACAACATGACCGAGATGAGCTTCCTGAACAGCGAAGTGTTGGCGGGGGACTTGATGTCCCCCTTCGACCAGTCGGGTTTGGGGGCTGAAGAAAGCCTAGGTCTCTTAGATGAC	1	+	chr15:80086717-80086836
ATF4	BA_593036_004823	ATGTCCCCCTTCGACCAGTCGGGTTTGGGGGCTGAAGAAAGCCTAGGTCTCTTAGATGACTATCTGGAGGTGGCCAAGCACTTGAAACCTCATGGGTTCTCCAGCGACAAGGCGGGCTCC	1	+	chr15:80086777-80086896
ATF4	BA_593036_004824	TATCTGGAGGTGGCCAAGCACTTGAAACCTCATGGGTTCTCCAGCGACAAGGCGGGCTCCTCGGAATGGCCGGCTATGGATGATGGCTTGGCCAGTGCCTCAGACACCGGCAAGGGTGAG	1	+	chr15:80086837-80086956
ATF4	BA_593036_004825	TCGGAATGGCCGGCTATGGATGATGGCTTGGCCAGTGCCTCAGACACCGGCAAGGGTGAGTAGGACGGCTGTCCTGGTGTGCCCTTTTCATATGGATCTGGTGTTCTAATGGCTTTCTGC	1	+	chr15:80086897-80087016
ATF4	BA_593036_004826	TAGGACGGCTGTCCTGGTGTGCCCTTTTCATATGGATCTGGTGTTCTAATGGCTTTCTGCCTCCCGAATATGACATGAACCGTTCACACCTGAATTTCTTTTCCCAGAGGATGCCTTTTC	1	+	chr15:80086957-80087076
ATF4	BA_593036_004827	CTCCCGAATATGACATGAACCGTTCACACCTGAATTTCTTTTCCCAGAGGATGCCTTTTCCGGGACAGATTGGATGTTGGAGAAAATGGATCTGAAAGAGTTTGACTTCGATGCTCTGTT	1	+	chr15:80087017-80087136
ATF4	BA_593036_004828	CGGGACAGATTGGATGTTGGAGAAAATGGATCTGAAAGAGTTTGACTTCGATGCTCTGTTTCGAATGGATGACCTGGAAACCATGCCAGATGAGCTCTTGACCACGTTGGATGACACATG	1	+	chr15:80087077-80087196
ATF4	BA_593036_004829	TCGAATGGATGACCTGGAAACCATGCCAGATGAGCTCTTGACCACGTTGGATGACACATGTGATCTTTTTGCCCCTCTAGTCCAAGAGACTAATAAGGAGCCCCCTCAGACAGTGAACCC	1	+	chr15:80087137-80087256
ATF4	BA_593036_004830	TGATCTTTTTGCCCCTCTAGTCCAAGAGACTAATAAGGAGCCCCCTCAGACAGTGAACCCAATTGGCCATCTCCCAGAAAGTTTAATAAAAGTCGACCAGGTTGCCCCCTTTACATTCTT	1	+	chr15:80087197-80087316
ATF4	BA_593036_004831	AATTGGCCATCTCCCAGAAAGTTTAATAAAAGTCGACCAGGTTGCCCCCTTTACATTCTTGCAGCCTTTCCCCTGTTCCCCAGGGGTTCTGTCTTCCACTCCAGAGCATTCCTTTAGTTT	1	+	chr15:80087257-80087376
ATF4	BA_593036_004832	GCAGCCTTTCCCCTGTTCCCCAGGGGTTCTGTCTTCCACTCCAGAGCATTCCTTTAGTTTAGAGCTAGGCAGTGAAGTTGATATCTCTGAAGGAGACAGGAAGCCTGACTCTGCTGCTTA	1	+	chr15:80087317-80087436
ATF4	BA_593036_004833	AGAGCTAGGCAGTGAAGTTGATATCTCTGAAGGAGACAGGAAGCCTGACTCTGCTGCTTACATTACTCTAATCCCTCCATGTGTAAAGGAGGAAGACACTCCCTCTGACAATGACAGTGG	1	+	chr15:80087377-80087496
ATF4	BA_593036_004834	CATTACTCTAATCCCTCCATGTGTAAAGGAGGAAGACACTCCCTCTGACAATGACAGTGGCATCTGTATGAGCCCAGAGTCCTACCTGGGCTCTCCCCAGCATAGCCCCTCCACCTCCAG	1	+	chr15:80087437-80087556
ATP2A1	BA_593036_001192	CTCTCCTAGGTCTTATTTTCCAACTAAGATGCTAAAGAAATTCTAAAAATGCAAGATGGACTGCAGGGATGGAGGGTGACAAGCAGCCAGCAGCAGGAGCTATGAATGCTGGAGATGTAA	1	+	chr7:133604897-133605016
ATP2A1	BA_593036_001193	CTGCAGGGATGGAGGGTGACAAGCAGCCAGCAGCAGGAGCTATGAATGCTGGAGATGTAACAAGGGGATGGGGTAGCCTAAGGCTCTGAGGGACCTGGAGACACCGAGGTAAGGATGAAT	1	+	chr7:133604957-133605076
ATP2A1	BA_593036_001194	CAAGGGGATGGGGTAGCCTAAGGCTCTGAGGGACCTGGAGACACCGAGGTAAGGATGAATTAGGCTGGATAAAAAGAAGTCGGCACCAAGCTCCAGGCCCAAAGGAAGTGGCATGTGGTC	1	+	chr7:133605017-133605136
ATP2A1	BA_593036_001195	TAGGCTGGATAAAAAGAAGTCGGCACCAAGCTCCAGGCCCAAAGGAAGTGGCATGTGGTCCAACCTGGAGACAGCTGAGGGGTGAGGGGTGGAAGGGTTGGTAAGGTCTGCAGGGCACCC	1	+	chr7:133605077-133605196
ATP2A1	BA_593036_001196	CAACCTGGAGACAGCTGAGGGGTGAGGGGTGGAAGGGTTGGTAAGGTCTGCAGGGCACCCTGGCAGTCAGTCGCCCTTGTACCAAATCTTTCTCTTAGTCAATCAGTACCACAGGTTGGA	1	+	chr7:133605137-133605256
ATP2A1	BA_593036_001197	TGGCAGTCAGTCGCCCTTGTACCAAATCTTTCTCTTAGTCAATCAGTACCACAGGTTGGAGAGGGCAGGGCAGGATCGGTGACGCAGAGTAGGGGACCAACCAGGACAGGCTGGGAGTGA	1	+	chr7:133605197-133605316
ATP2A1	BA_593036_001198	GAGGGCAGGGCAGGATCGGTGACGCAGAGTAGGGGACCAACCAGGACAGGCTGGGAGTGACAGTGGCCCCATAGTAGACATTGTAACCCTCACTGAAGCAGGGAGCCTATGCTTGGGGGG	1	+	chr7:133605257-133605376
ATP2A1	BA_593036_001199	CAGTGGCCCCATAGTAGACATTGTAACCCTCACTGAAGCAGGGAGCCTATGCTTGGGGGGGGGGGGGTAACCTGAGCTCTTGAAGCCCTTGAAGCTGGGAGGGTGGCTTAGCTTCAGTGT	1	+	chr7:133605317-133605436
ATP2A1	BA_593036_001200	GGGGGGGTAACCTGAGCTCTTGAAGCCCTTGAAGCTGGGAGGGTGGCTTAGCTTCAGTGTTTTGGCTGAGAACACTCTCAGGGCTTAAAATAAAACCTCTCTGCAGGGGAGGAAGCACCC	1	+	chr7:133605377-133605496
ATP2A1	BA_593036_001201	TTTGGCTGAGAACACTCTCAGGGCTTAAAATAAAACCTCTCTGCAGGGGAGGAAGCACCCCAGCACCCCACCCCCAGCTCCTGCCTGGAAAACAGGGTGGTCAGGGCTTGGACGAGGGCA	1	+	chr7:133605437-133605556
ATP2A1	BA_593036_001202	CAGCACCCCACCCCCAGCTCCTGCCTGGAAAACAGGGTGGTCAGGGCTTGGACGAGGGCATCCAGGATGGTAAGAGCCACAGGCTGATCCCAAGGCCCACATCATACTCAGACAGCACTT	1	+	chr7:133605497-133605616
ATP2A1	BA_593036_001203	TCCAGGATGGTAAGAGCCACAGGCTGATCCCAAGGCCCACATCATACTCAGACAGCACTTACAAAGGAAATGCAGGCAGCCAGGAGAAGAATCCGCACAAGCAGGTCTTCGAACTGCTCT	1	+	chr7:133605557-133605676
ATP2A1	BA_593036_001204	ACAAAGGAAATGCAGGCAGCCAGGAGAAGAATCCGCACAAGCAGGTCTTCGAACTGCTCTACCACCAACTCCCACAGAGACTTGCCTGGGGGGTGGGGGGACAAGAAGAGGAGTCCCAGG	1	+	chr7:133605617-133605736
ATP2A1	BA_593036_001205	ACCACCAACTCCCACAGAGACTTGCCTGGGGGGTGGGGGGACAAGAAGAGGAGTCCCAGGGTTAAGGGATGAGTGTCCGTGGATGGGGATGGGCCAGGGTCCAGAGTCTAGAGTGCCCTG	1	+	chr7:133605677-133605796
ATP2A1	BA_593036_001206	GTTAAGGGATGAGTGTCCGTGGATGGGGATGGGCCAGGGTCCAGAGTCTAGAGTGCCCTGGTCCTCTAGGTTGATAGGCAGCCCAGCTTGGCATGAGAGAAAGAGATGAAACAGCCCAAA	1	+	chr7:133605737-133605856
ATP2A1	BA_593036_001207	GTCCTCTAGGTTGATAGGCAGCCCAGCTTGGCATGAGAGAAAGAGATGAAACAGCCCAAAAGGCTCTTCAAATCTGTGGCAGCTGTTCCAGGTGGGGAGGACTCAGGGAAGGTGTCTGGA	1	+	chr7:133605797-133605916
ATP2A1	BA_593036_001208	AGGCTCTTCAAATCTGTGGCAGCTGTTCCAGGTGGGGAGGACTCAGGGAAGGTGTCTGGAGTCTTGACGCTTAAGCTTTGAGGAAAGGCTATGGGTCTCAGTAAGGAGAAGGCGGGGAGT	1	+	chr7:133605857-133605976
ATP2A1	BA_593036_001209	GTCTTGACGCTTAAGCTTTGAGGAAAGGCTATGGGTCTCAGTAAGGAGAAGGCGGGGAGTCGGGGATGAGGGGCATAGGAGGGTCAGGGTAACTTACCTTCCTCAGCAGGGAGCTCTACC	1	+	chr7:133605917-133606036
ATP2A1	BA_593036_001210	CGGGGATGAGGGGCATAGGAGGGTCAGGGTAACTTACCTTCCTCAGCAGGGAGCTCTACCCAGGGAAAAAGAAGAAAAGAACAAATTCAGTGGGGGCCCATGCCCCATGCCCCCACACCC	1	+	chr7:133605977-133606096
ATP2A1	BA_593036_001211	CAGGGAAAAAGAAGAAAAGAACAAATTCAGTGGGGGCCCATGCCCCATGCCCCCACACCCCAAACTCTGTGGCTAACATAAGAGAATCAGGGTATCAGAAGGGTGTCCCATGAGGCTCAA	1	+	chr7:133606037-133606156
ATP2A1	BA_593036_001212	CAAACTCTGTGGCTAACATAAGAGAATCAGGGTATCAGAAGGGTGTCCCATGAGGCTCAAGGTCACCCTATGAAACCTCCCCAAACTCCAGATTTTAAAACTTTTCTTTAGTATCCTCCT	1	+	chr7:133606097-133606216
ATP2A1	BA_593036_001213	GGTCACCCTATGAAACCTCCCCAAACTCCAGATTTTAAAACTTTTCTTTAGTATCCTCCTTCTTCTCCAGTCCTGCTCCACCTTATACACTTTGGAAGAAGCAGCTCCCCTGACAGGGGT	1	+	chr7:133606157-133606276
ATP2A1	BA_593036_001214	TCTTCTCCAGTCCTGCTCCACCTTATACACTTTGGAAGAAGCAGCTCCCCTGACAGGGGTAGGAGGGCAGCCATACCAGCTTCTCCTCGGAGGGATACTTACCATTGGGGCCGTATTTTT	1	+	chr7:133606217-133606336
ATP2A1	BA_593036_001215	AGGAGGGCAGCCATACCAGCTTCTCCTCGGAGGGATACTTACCATTGGGGCCGTATTTTTCCAGATGTCGCTTAACTTGGTCTGGGGTAAGGCCTGTGGTCTCGCTCACCCCGAAATAGG	1	+	chr7:133606277-133606396
ATP2A1	BA_593036_001216	CCAGATGTCGCTTAACTTGGTCTGGGGTAAGGCCTGTGGTCTCGCTCACCCCGAAATAGGACAAACATTCCTCTGTGGACTTGGAGTGCGCGGCCTCCATTGTGCTCCCTTCCTGGGGGC	1	+	chr7:133606337-133606456
ATP2A1	BA_593036_001217	ACAAACATTCCTCTGTGGACTTGGAGTGCGCGGCCTCCATTGTGCTCCCTTCCTGGGGGCCAGGGGGTGATGTGTTTCTTCTTAGGGGCCTCTCACTTGTGGGGGGACTTCTTCAGCTTA	1	+	chr7:133606397-133606516
ATP2A1	BA_593036_001218	CAGGGGGTGATGTGTTTCTTCTTAGGGGCCTCTCACTTGTGGGGGGACTTCTTCAGCTTATCCACCTGCCTGTTGATCTGGGCTCCTTCCTTTTTCTTGCTTGCCCCCCCCAGATTCTTC	1	+	chr7:133606457-133606576
ATP2A1	BA_593036_001219	TCCACCTGCCTGTTGATCTGGGCTCCTTCCTTTTTCTTGCTTGCCCCCCCCAGATTCTTCTCCTTTCCACGAAGTTCTGACCCCAGTCCTACTTGCGCAGCCGGCCACCCCCCCAGCCCC	1	+	chr7:133606517-133606636
ATP2A1	BA_593036_001220	TCCTTTCCACGAAGTTCTGACCCCAGTCCTACTTGCGCAGCCGGCCACCCCCCCAGCCCCCAGCTGGTCCTTATGAGGGAGTGGGGGGGGCAGGCTCCCCCTTCCTCCAGGTCAGGGATT	2	+	chr7:133606577-133606696
ATP2A1	BA_593036_001221	CAGCTGGTCCTTATGAGGGAGTGGGGGGGGCAGGCTCCCCCTTCCTCCAGGTCAGGGATTGGCTGGCTGAGACCCCAGCAGGAGGGGTCAGGAGAGAGAGAGGTTTCTGCTGACAGAGAG	1	+	chr7:133606637-133606756
ATP2A1	BA_593036_001222	GGCTGGCTGAGACCCCAGCAGGAGGGGTCAGGAGAGAGAGAGGTTTCTGCTGACAGAGAGGAACAGTGGGGCTGCAGCCTGAGGTGTCACTCACAAGGGACGCAAAGGTGGCCCCAGCCT	1	+	chr7:133606697-133606816
ATP2A1	BA_593036_001223	GAACAGTGGGGCTGCAGCCTGAGGTGTCACTCACAAGGGACGCAAAGGTGGCCCCAGCCTCAGAGAGGAGGGGGGAGTAAAGTCACTTTCTATCATCCGCTACTGACCCCACCCCCAGTT	1	+	chr7:133606757-133606876
ATP2A1	BA_593036_001224	CAGAGAGGAGGGGGGAGTAAAGTCACTTTCTATCATCCGCTACTGACCCCACCCCCAGTTGCCTCAACTTCTCCAGTTACACTAAATTCTCAGTTCCAAGCCCACCCCTGAGCAGATCTT	1	+	chr7:133606817-133606936
ATP2A1	BA_593036_001225	GCCTCAACTTCTCCAGTTACACTAAATTCTCAGTTCCAAGCCCACCCCTGAGCAGATCTTTCCATAAGCCCTCTTGGCCCTTAGGCCTTATCACTCCTTAGCCTGGTCTTGACATCATGA	1	+	chr7:133606877-133606996
ATP2A1	BA_593036_001226	TCCATAAGCCCTCTTGGCCCTTAGGCCTTATCACTCCTTAGCCTGGTCTTGACATCATGAACCCCTTTCCACTGTCACAGTCTCCTCCCCTGCCTAATGTGTTTGGTTAGCAGAGGAAGT	1	+	chr7:133606937-133607056
ATP2A1	BA_593036_001227	ACCCCTTTCCACTGTCACAGTCTCCTCCCCTGCCTAATGTGTTTGGTTAGCAGAGGAAGTTCTCCAAGCCTTTTGGGGGATCAAAGGAAAGGGGAGCGCATCTTTGGGGACAGAGGAAGT	1	+	chr7:133606997-133607116
ATP2A1	BA_593036_001228	TCTCCAAGCCTTTTGGGGGATCAAAGGAAAGGGGAGCGCATCTTTGGGGACAGAGGAAGTAGCTCTAGAGAGATACAGGGAACCAGGGAAGGGAGATAGTCAAGGGGACAGTGCAGATGG	1	+	chr7:133607057-133607176
ATP2A1	BA_593036_001229	AGCTCTAGAGAGATACAGGGAACCAGGGAAGGGAGATAGTCAAGGGGACAGTGCAGATGGTAACCTTACCCTAGGGAGGGGTTGCTGCAGCCATCAACAAGGGATTTAGTGTCCAGGCCC	1	+	chr7:133607117-133607236
ATP2A1	BA_593036_001230	TAACCTTACCCTAGGGAGGGGTTGCTGCAGCCATCAACAAGGGATTTAGTGTCCAGGCCCTGGTAAGCAAAGCCAGGACTGTCTGTCTCTCCTAAACTCCCCCCACCACTACCGCTTTAG	1	+	chr7:133607177-133607296
ATP2A1	BA_593036_001231	TGGTAAGCAAAGCCAGGACTGTCTGTCTCTCCTAAACTCCCCCCACCACTACCGCTTTAGCTCAGCCTCTGGGAACACAGCCTTTAGCTCCCCTGTGAAACTGGCAGGGAATCCCCCCCA	1	+	chr7:133607237-133607356
ATP2A1	BA_593036_001232	CTCAGCCTCTGGGAACACAGCCTTTAGCTCCCCTGTGAAACTGGCAGGGAATCCCCCCCACCCCACCCCGAAGAAAATGGGACACCCAGGCAGCCAGGTAACCCAAGAGGCTACGGAATG	1	+	chr7:133607297-133607416
ATP2A1	BA_593036_001233	CCCCACCCCGAAGAAAATGGGACACCCAGGCAGCCAGGTAACCCAAGAGGCTACGGAATGTGCTGATGGAAGAGGGGGAGGGATGGGTGTTTCAGGGTGGGGCAGGGGGAGTAAGGATCT	1	+	chr7:133607357-133607476
ATP2A1	BA_593036_001234	TGCTGATGGAAGAGGGGGAGGGATGGGTGTTTCAGGGTGGGGCAGGGGGAGTAAGGATCTCCCCACCCTACACTAGCCTTCAACCCTAGGGCTTCATGGTGACCCCCCCAGAAGTGTGGG	1	+	chr7:133607417-133607536
ATP2A1	BA_593036_001235	CCCCACCCTACACTAGCCTTCAACCCTAGGGCTTCATGGTGACCCCCCCAGAAGTGTGGGGTTCTCTGAAACTCTCACCCTGATGCAACAGCTCACAGAGGGAATGGGGATCAGGGCTGG	1	+	chr7:133607477-133607596
ATP2A1	BA_593036_001236	GTTCTCTGAAACTCTCACCCTGATGCAACAGCTCACAGAGGGAATGGGGATCAGGGCTGGCAGGAGTGCTCTGGAGCTGGGCCAGCCCCAAGCCAGTGACTGAGAGCAGGACCCCTGAGG	1	+	chr7:133607537-133607656
ATP2A1	BA_593036_001237	CAGGAGTGCTCTGGAGCTGGGCCAGCCCCAAGCCAGTGACTGAGAGCAGGACCCCTGAGGCTGGATGAAGCAGAGGCTCTGGAAGGGAGGGGAGAAGGTATGGAGAAAAGGGGACAGAAC	1	+	chr7:133607597-133607716
ATP2A1	BA_593036_001238	CTGGATGAAGCAGAGGCTCTGGAAGGGAGGGGAGAAGGTATGGAGAAAAGGGGACAGAACAGAGTTGGGAGCAAAGAGCACAGACTTCCTAAGCCCAAAGAGAAGAGGGAAAAGAAACAG	1	+	chr7:133607657-133607776
ATP2A1	BA_593036_001239	AGAGTTGGGAGCAAAGAGCACAGACTTCCTAAGCCCAAAGAGAAGAGGGAAAAGAAACAGCAGGGTTCGGGCAGTGGCAGTCCTGTGGGCGGGGCCCCAGAGGCTGGGTGCAAAGCCACA	1	+	chr7:133607717-133607836
ATP2A1	BA_593036_001240	CAGGGTTCGGGCAGTGGCAGTCCTGTGGGCGGGGCCCCAGAGGCTGGGTGCAAAGCCACAAGTTGTTGCTGAAGGGCTGGCCTGGCCTGGGTGTCAGCTTCCTCCAAAGAGCAGCTGCTC	2	+	chr7:133607777-133607896
ATP2A1	BA_593036_001241	AGTTGTTGCTGAAGGGCTGGCCTGGCCTGGGTGTCAGCTTCCTCCAAAGAGCAGCTGCTCTGAGCCACCCTTCCCCACCCGCTTCATCATTGGGGTATCTTTTGATTTCCACCCAAGCAG	1	+	chr7:133607837-133607956
ATP2A1	BA_593036_001242	TGAGCCACCCTTCCCCACCCGCTTCATCATTGGGGTATCTTTTGATTTCCACCCAAGCAGCTGCTGGAGGAGGAGCAGCCGGGGTATATGGGCCAGGCTGCAAGCAGGGGGAAACTGAGG	1	+	chr7:133607897-133608016
ATP2A1	BA_593036_001243	CTGCTGGAGGAGGAGCAGCCGGGGTATATGGGCCAGGCTGCAAGCAGGGGGAAACTGAGGCAGTAAAGTTTCCATGGGACTAGAGATAGAAAGGTCAGTGAGGACCAGCAGCACTGTAGC	1	+	chr7:133607957-133608076
ATP2A1	BA_593036_001244	CAGTAAAGTTTCCATGGGACTAGAGATAGAAAGGTCAGTGAGGACCAGCAGCACTGTAGCCCTGGAACACAGGTCCCACCTCTACCCAGGCCTCAGTTTCCCTGAAAGAACCAAGGAGCA	1	+	chr7:133608017-133608136
ATP2A1	BA_593036_001245	CCTGGAACACAGGTCCCACCTCTACCCAGGCCTCAGTTTCCCTGAAAGAACCAAGGAGCAGGTCCCACACAAGGGCTCCAGTGCACAGACAGAATGATAAGGCAGCAGAGCCCACAGAAC	1	+	chr7:133608077-133608196
ATP2A1	BA_593036_001246	GGTCCCACACAAGGGCTCCAGTGCACAGACAGAATGATAAGGCAGCAGAGCCCACAGAACAAAAAGAAGCCCCACTTGTTGGGGTGACCACTGGCCAACACCGAGAGATAGAAATGAAGG	1	+	chr7:133608137-133608256
ATP2A1	BA_593036_001247	AAAAAGAAGCCCCACTTGTTGGGGTGACCACTGGCCAACACCGAGAGATAGAAATGAAGGGCTGAGCCTCGGATTCATCCTGCCTTCTGCCCAGACTTGGGGGAGGGGTGAAGTCAGGAC	1	+	chr7:133608197-133608316
AXIN1	BA_593036_008777	CAATTCTGGGAGGAGCAAAGGCATTTCAAGGCTCTCAAGTGCTGTCCTTTACCCTCTCATTGCAGAAACTCCCTCAAGGTCTTCATAATTTAATCCTTTTACCCCTATTTATAATTTCTC	1	+	chr17:26273946-26274065
AXIN1	BA_593036_008778	TGCAGAAACTCCCTCAAGGTCTTCATAATTTAATCCTTTTACCCCTATTTATAATTTCTCCCCCACCACACCCCCCCCCCCCAGCACTCCTTAGCAGGCCGTTGCATTTCCTCCAGGCTT	1	+	chr17:26274006-26274125
AXIN1	BA_593036_008779	CCCCACCACACCCCCCCCCCCCAGCACTCCTTAGCAGGCCGTTGCATTTCCTCCAGGCTTCCTGATTCCCTTCCTGTCCCTGCAGGGCAGGGGTCCCGAGGAGCTGGAGGCCCGAGGGCC	2	+	chr17:26274066-26274185
AXIN1	BA_593036_008780	CCTGATTCCCTTCCTGTCCCTGCAGGGCAGGGGTCCCGAGGAGCTGGAGGCCCGAGGGCCCTACTCTGGTCCCAGGGCTTGGGGATACCTACCACCGTGGGCCAGCAGGAGGATGGACGT	2	+	chr17:26274126-26274245
AXIN1	BA_593036_008781	CTACTCTGGTCCCAGGGCTTGGGGATACCTACCACCGTGGGCCAGCAGGAGGATGGACGTGGACTTGATCCCGAGAGCCTGGCCTGGCCGCAGCAGCAGCTCTACAGAATCAAGGCAAGC	1	+	chr17:26274186-26274305
AXIN1	BA_593036_008782	GGACTTGATCCCGAGAGCCTGGCCTGGCCGCAGCAGCAGCTCTACAGAATCAAGGCAAGCATTGGGGTCCGGGTTTGGGAGTGGGGAGGATGCCCAAGGCCAAGGCTATCTACTGCTCAC	1	+	chr17:26274246-26274365
AXIN1	BA_593036_008783	ATTGGGGTCCGGGTTTGGGAGTGGGGAGGATGCCCAAGGCCAAGGCTATCTACTGCTCACTCAGTGGTCGTGATTGTTTCTTCTAATGGTATGAGGCTGAATGGTCTGGGTCAGGGGCTG	1	+	chr17:26274306-26274425
AXIN1	BA_593036_008784	TCAGTGGTCGTGATTGTTTCTTCTAATGGTATGAGGCTGAATGGTCTGGGTCAGGGGCTGCTAGAGAGTCTCCAGTGCCCAGAGGCCGGAGGACCTGAGGCTGCATTAGATGGACAGAAG	1	+	chr17:26274366-26274485
AXIN1	BA_593036_008785	CTAGAGAGTCTCCAGTGCCCAGAGGCCGGAGGACCTGAGGCTGCATTAGATGGACAGAAGTGAACATGAAACTTGTCCTGGCATTTGAGGGGGGGGGCACTATCTATACCCCAGCCCCAG	1	+	chr17:26274426-26274545
AXIN1	BA_593036_008786	TGAACATGAAACTTGTCCTGGCATTTGAGGGGGGGGGCACTATCTATACCCCAGCCCCAGACCTGAGGCTCAGTGATGAGTCTAGGAGGGGAATTTGTCAGGCTTGGTCACCCTAGTAGC	1	+	chr17:26274486-26274605
AXIN1	BA_593036_008787	ACCTGAGGCTCAGTGATGAGTCTAGGAGGGGAATTTGTCAGGCTTGGTCACCCTAGTAGCTATAGTTCAAGTGGTTCCTTCTCTATACATAGCAATCCTGGTCCTCGGTACTGTGCTAAG	1	+	chr17:26274546-26274665
AXIN1	BA_593036_008788	TATAGTTCAAGTGGTTCCTTCTCTATACATAGCAATCCTGGTCCTCGGTACTGTGCTAAGTCCTCTTAAGGGACAGGTGGCAGGGTTAGGATCACCCCAGTCAGCTGTGGGTTTAGAGTC	1	+	chr17:26274606-26274725
AXIN1	BA_593036_008789	TCCTCTTAAGGGACAGGTGGCAGGGTTAGGATCACCCCAGTCAGCTGTGGGTTTAGAGTCTGAAGCCAGTACTACTGCTTTTGCCTGTGAGCCATGAAGAAGGGACAAGGCAATGAGGGA	1	+	chr17:26274666-26274785
AXIN1	BA_593036_008790	TGAAGCCAGTACTACTGCTTTTGCCTGTGAGCCATGAAGAAGGGACAAGGCAATGAGGGAGAACAATGTCCAGAACAAAACATGGCAGTGGCACTGGCAGCAGCAGTATAAAAGCATGTA	1	+	chr17:26274726-26274845
AXIN1	BA_593036_008791	GAACAATGTCCAGAACAAAACATGGCAGTGGCACTGGCAGCAGCAGTATAAAAGCATGTAGATGGCAAGTGCAGATGCAGCCAGTATAGGGTGGTATGGGTACCAGGAGTCCTCTGGCCA	1	+	chr17:26274786-26274905
AXIN1	BA_593036_008792	GATGGCAAGTGCAGATGCAGCCAGTATAGGGTGGTATGGGTACCAGGAGTCCTCTGGCCAAGGTGAGGTCTGGGTGGGTGCGTACTAAGCCTAGGTCACAACTTTTTGTCTGCAAAATGG	1	+	chr17:26274846-26274965
AXIN1	BA_593036_008793	AGGTGAGGTCTGGGTGGGTGCGTACTAAGCCTAGGTCACAACTTTTTGTCTGCAAAATGGACTACCTGAGAGGTGTCAGGGGCTGATTTGACTGGTAGATGACATTCTTAAGTGCAGTAA	1	+	chr17:26274906-26275025
AXIN1	BA_593036_008794	ACTACCTGAGAGGTGTCAGGGGCTGATTTGACTGGTAGATGACATTCTTAAGTGCAGTAATTACTTGTGTTCACATATTTCTCCTTGGGATGTGGCTGACCGAGGGTTGAGACCTGCCAA	1	+	chr17:26274966-26275085
AXIN1	BA_593036_008795	TTACTTGTGTTCACATATTTCTCCTTGGGATGTGGCTGACCGAGGGTTGAGACCTGCCAAGTAGAGAGTTGTGCATCTATGTTCCTGTGGTGGGGCAAAATGGAGTTGACTCTTTGCGCT	1	+	chr17:26275026-26275145
AXIN1	BA_593036_008796	GTAGAGAGTTGTGCATCTATGTTCCTGTGGTGGGGCAAAATGGAGTTGACTCTTTGCGCTTGCAGACTTAGCAAGAGATGCCTTGCAGACATTATAAGTGTTATGTGTGTATTTGTGTGG	1	+	chr17:26275086-26275205
AXIN1	BA_593036_008797	TGCAGACTTAGCAAGAGATGCCTTGCAGACATTATAAGTGTTATGTGTGTATTTGTGTGGAGGGCGACCAGCTACCCAGAAACTCTACTCTCTCAATAGCATCTGCGATCAGATATGAGT	1	+	chr17:26275146-26275265
AXIN1	BA_593036_008798	AGGGCGACCAGCTACCCAGAAACTCTACTCTCTCAATAGCATCTGCGATCAGATATGAGTGGTCTGCCTTCAGTGTACTGGCCTAGGGTTCAGTGATGGCTGTGGTTGTTGAGCGCGCTC	1	+	chr17:26275206-26275325
AXIN1	BA_593036_008799	GGTCTGCCTTCAGTGTACTGGCCTAGGGTTCAGTGATGGCTGTGGTTGTTGAGCGCGCTCAGGGCTGTTTCCCATGGCACCTTTCGGGACGAGCAGTAGTCGTTGCCCCATTGGGCATCC	1	+	chr17:26275266-26275385
AXIN1	BA_593036_008800	AGGGCTGTTTCCCATGGCACCTTTCGGGACGAGCAGTAGTCGTTGCCCCATTGGGCATCCTCCGCGGCTACGTTTCTTTTCAGCGGCACTCCTAGTTCACGCCCCGCCTTCACCACCGCA	1	+	chr17:26275326-26275445
AXIN1	BA_593036_008801	TCCGCGGCTACGTTTCTTTTCAGCGGCACTCCTAGTTCACGCCCCGCCTTCACCACCGCAAGACAGTGCTTGGCTCCTGAGTACGCCGCAGTCCCGCCTTTCGCTCAAGACTCTGCCCCT	1	+	chr17:26275386-26275505
AXIN1	BA_593036_008802	AGACAGTGCTTGGCTCCTGAGTACGCCGCAGTCCCGCCTTTCGCTCAAGACTCTGCCCCTTACTCTTCTTGTCCTCGGACTCCCACCCGCCCCGTGTTAGAAGCTCCGCCCCACACCGTG	1	+	chr17:26275446-26275565
AXIN1	BA_593036_008803	TACTCTTCTTGTCCTCGGACTCCCACCCGCCCCGTGTTAGAAGCTCCGCCCCACACCGTGGTTCTGCCTCTACAACGAGACCCAGCCTCCGCAGCAGTCCCGCCCCACACCACGGCCCCG	2	+	chr17:26275506-26275625
AXIN1	BA_593036_008804	GTTCTGCCTCTACAACGAGACCCAGCCTCCGCAGCAGTCCCGCCCCACACCACGGCCCCGCCCCCGCACTTCCGGGCGGCGCCGGCGGGGGCGCTCAGGCCTGGGCTTCAGGGCTCTGGG	2	+	chr17:26275566-26275685
AXIN1	BA_593036_008805	CCCCCGCACTTCCGGGCGGCGCCGGCGGGGGCGCTCAGGCCTGGGCTTCAGGGCTCTGGGCTCAGGCTCCCGGCTCAGGGAAGCGCTTGCGGCCGCCGCCGCAGGAGCCTGCTGGGGTCG	2	+	chr17:26275626-26275745
AXIN1	BA_593036_008806	CTCAGGCTCCCGGCTCAGGGAAGCGCTTGCGGCCGCCGCCGCAGGAGCCTGCTGGGGTCGGGCTGGAGCCTGGTTCCAGAGAGGGCTGGTGAGAGTGAGCAGCCGGTTTTGGCGGCGCTC	2	+	chr17:26275686-26275805
AXIN1	BA_593036_008807	GGCTGGAGCCTGGTTCCAGAGAGGGCTGGTGAGAGTGAGCAGCCGGTTTTGGCGGCGCTCTGCGGCCTGCCTTGCGCCGCCTCCGGGCCACGGGTCGCCGAGCCGCCGCCGCCGCCGCGA	2	+	chr17:26275746-26275865
AXIN1	BA_593036_008808	CCCGCCGTGGCCCGCCCGCTGAGCCGCCGCTGAGCGCATGGGCCTCGCCGGGCCGGGAGCCAGGCCCCGGGCCGCGCCTCCACAGCCGCCGCGCGCTGGTGAGTAGTGGGAGCCGACGGG	2	+	chr17:26275889-26276008
AXIN1	BA_593036_008809	CAGGCCCCGGGCCGCGCCTCCACAGCCGCCGCGCGCTGGTGAGTAGTGGGAGCCGACGGGCGCGCTCCTGTGGCGCGGAGGCCTGCTGCCCGGGGCTGCGGGAGTAGGCCGCGCTAGGCC	2	+	chr17:26275949-26276068
AXIN1	BA_593036_008810	CGCGCTCCTGTGGCGCGGAGGCCTGCTGCCCGGGGCTGCGGGAGTAGGCCGCGCTAGGCCGGCGTACGCGGACCCGGAAGAGAGGGGCGCGCGGGTTGCGGGCGGGAGGCGTGCCGGAGC	2	+	chr17:26276009-26276128
AXIN1	BA_593036_008811	GGCGTACGCGGACCCGGAAGAGAGGGGCGCGCGGGTTGCGGGCGGGAGGCGTGCCGGAGCGCGGCCCCTGATGTGCGAGGTTGTGCCCGGCGTAGGGAGACCTGAGATCCAAGGGGACGT	2	+	chr17:26276069-26276188
AXIN1	BA_593036_008812	GCGGCCCCTGATGTGCGAGGTTGTGCCCGGCGTAGGGAGACCTGAGATCCAAGGGGACGTTGAGCGGAAGAGGTGGCAGGCTCCGCAGTATGAGTAGAGGCGTGGGGACTGCATGGTATG	1	+	chr17:26276129-26276248
AXIN1	BA_593036_008813	TGAGCGGAAGAGGTGGCAGGCTCCGCAGTATGAGTAGAGGCGTGGGGACTGCATGGTATGCTAGGTATATATGAGGAGAAGGGCTTGGGGGTGGGGGGGGCGATGTGCCAGGGACAGGAC	1	+	chr17:26276189-26276308
AXIN1	BA_593036_008814	CTAGGTATATATGAGGAGAAGGGCTTGGGGGTGGGGGGGGCGATGTGCCAGGGACAGGACGATAGTAGGGCATGGGGAAAGCAAGGCCTGTTTGAACAGGACCAGGGACTAAGGAAAAGC	1	+	chr17:26276249-26276368
AXIN1	BA_593036_008815	GATAGTAGGGCATGGGGAAAGCAAGGCCTGTTTGAACAGGACCAGGGACTAAGGAAAAGCAAGGATTCTAAGAATGATGTACAGGTGGGTGTGTGTCTGCCGAGTGTGGTGTACTGTTGA	1	+	chr17:26276309-26276428
AXIN1	BA_593036_008816	AAGGATTCTAAGAATGATGTACAGGTGGGTGTGTGTCTGCCGAGTGTGGTGTACTGTTGATGGGTCTGGGACACATTTAGGATATGGGTGAGTGGGTGCTGAGAAGCTGCTGGTGCTAGA	1	+	chr17:26276369-26276488
AXIN1	BA_593036_008817	TGGGTCTGGGACACATTTAGGATATGGGTGAGTGGGTGCTGAGAAGCTGCTGGTGCTAGACTGTGTGTGTGTCTTCCTTTGCGCTATCCCCTAGTCCCTATGAAAAAGTAAAGTAGGGAC	1	+	chr17:26276429-26276548
AXIN1	BA_593036_008818	CTGTGTGTGTGTCTTCCTTTGCGCTATCCCCTAGTCCCTATGAAAAAGTAAAGTAGGGACGAGTAAGAACAATCCAAGGAGGGCACTCTCTGGTGTGGTTTGGCTTGCCAGATAACCACT	1	+	chr17:26276489-26276608
AXIN1	BA_593036_008819	GAGTAAGAACAATCCAAGGAGGGCACTCTCTGGTGTGGTTTGGCTTGCCAGATAACCACTTGTCCTGGTGTTCATTGCCTTACTTAATAATGCTCCCCCCAAACAAAACAAATTCACCCA	1	+	chr17:26276549-26276668
AXIN1	BA_593036_008820	TGTCCTGGTGTTCATTGCCTTACTTAATAATGCTCCCCCCAAACAAAACAAATTCACCCAAAACCAAAGCCCAGAGCGAGCATTTTTAGTTGGGCATAAGGATTTTTTTCGGCTCATCTG	1	+	chr17:26276609-26276728
AXIN1	BA_593036_008821	AAACCAAAGCCCAGAGCGAGCATTTTTAGTTGGGCATAAGGATTTTTTTCGGCTCATCTGAAGATAACTTGTAAAGAGTTCGCAATAACTGTGTACTCCTCCCCTTTACTCCAATGCGTT	1	+	chr17:26276669-26276788
AXIN2	BA_678916_002067	TGGGGGCGGAGGCCCACTCGGATCTTTTGCATAAAAGGGGCAGCGGGGCGCACGATCCCCCCCCCCAAAAAAAACCCGGCGCAGACCTCGGGATCGTTGTTTTCCGTGCACCCCCTCCTC	1	+	chr11:108782238-108782357
AXIN2	BA_678916_002068	ATAAAAGGGGCAGCGGGGCGCACGATCCCCCCCCCCAAAAAAAACCCGGCGCAGACCTCGGGATCGTTGTTTTCCGTGCACCCCCTCCTCCGCCTCCGCGAGACTCCTCATGTTCCCCAC	1	+	chr11:108782268-108782387
AXIN2	BA_678916_002069	GGCAGCCTCTGCGAGTCCAGCGGGGGACCCGGGCAGGGGCTCTGCCCGCGGCGCCTGCGAGGTCTCCGCAAGGAGTGCGCCAGCGGATCAATGGTGAGTGCCGAGGCCGCGGCGGTCCGG	2	+	chr11:108782415-108782534
AXIN2	BA_678916_002070	GGGCAGGGGCTCTGCCCGCGGCGCCTGCGAGGTCTCCGCAAGGAGTGCGCCAGCGGATCAATGGTGAGTGCCGAGGCCGCGGCGGTCCGGCGGCCGGCGCGCTTTGATGTGCGGGGCGGC	2	+	chr11:108782445-108782564
AXIN2	BA_678916_002071	GGTCTCCGCAAGGAGTGCGCCAGCGGATCAATGGTGAGTGCCGAGGCCGCGGCGGTCCGGCGGCCGGCGCGCTTTGATGTGCGGGGCGGCGCTTTGAAGTTGGCAGGCCGGCTATTTCGG	2	+	chr11:108782475-108782594
AXIN2	BA_678916_002072	ATGGTGAGTGCCGAGGCCGCGGCGGTCCGGCGGCCGGCGCGCTTTGATGTGCGGGGCGGCGCTTTGAAGTTGGCAGGCCGGCTATTTCGGGGCGCGCTCCGGGCCCGCGCGGAGGGGAAG	2	+	chr11:108782505-108782624
AXIN2	BA_678916_002073	CGGCCGGCGCGCTTTGATGTGCGGGGCGGCGCTTTGAAGTTGGCAGGCCGGCTATTTCGGGGCGCGCTCCGGGCCCGCGCGGAGGGGAAGCGGCGGGCTCGGCGCCCAGCGCTCCGGGGG	2	+	chr11:108782535-108782654
AXIN2	BA_678916_002074	GCTTTGAAGTTGGCAGGCCGGCTATTTCGGGGCGCGCTCCGGGCCCGCGCGGAGGGGAAGCGGCGGGCTCGGCGCCCAGCGCTCCGGGGGGTTTGGCCGGGCGGCCCTGCGCGCGGTGAG	2	+	chr11:108782565-108782684
AXIN2	BA_678916_002075	GGCGCGCTCCGGGCCCGCGCGGAGGGGAAGCGGCGGGCTCGGCGCCCAGCGCTCCGGGGGGTTTGGCCGGGCGGCCCTGCGCGCGGTGAGCTGGAGTCCCCTCCCCTGCGCGGGGTCCGG	2	+	chr11:108782595-108782714
AXIN2	BA_678916_002076	CGGCGGGCTCGGCGCCCAGCGCTCCGGGGGGTTTGGCCGGGCGGCCCTGCGCGCGGTGAGCTGGAGTCCCCTCCCCTGCGCGGGGTCCGGGGTGGCGGGGGGCCGGTCAGGGAGACTTCT	2	+	chr11:108782625-108782744
AXIN2	BA_678916_002077	GTTTGGCCGGGCGGCCCTGCGCGCGGTGAGCTGGAGTCCCCTCCCCTGCGCGGGGTCCGGGGTGGCGGGGGGCCGGTCAGGGAGACTTCTCCAAGTGGCGTTGGGGACGGAGGCGGAGAC	2	+	chr11:108782655-108782774
AXIN2	BA_678916_002078	CTGGAGTCCCCTCCCCTGCGCGGGGTCCGGGGTGGCGGGGGGCCGGTCAGGGAGACTTCTCCAAGTGGCGTTGGGGACGGAGGCGGAGACGGGCAGCTCGCCCTCGGGGGTCGAGTCGCC	2	+	chr11:108782685-108782804
AXIN2	BA_678916_002079	GGTGGCGGGGGGCCGGTCAGGGAGACTTCTCCAAGTGGCGTTGGGGACGGAGGCGGAGACGGGCAGCTCGCCCTCGGGGGTCGAGTCGCCGTGGGTGTGGATGAGTTGGGGTGTGCGTGT	2	+	chr11:108782715-108782834
AXIN2	BA_678916_002080	CCAAGTGGCGTTGGGGACGGAGGCGGAGACGGGCAGCTCGCCCTCGGGGGTCGAGTCGCCGTGGGTGTGGATGAGTTGGGGTGTGCGTGTTCATGCGAGTGCTTTTGGAAGGTGGGATGA	2	+	chr11:108782745-108782864
AXIN2	BA_678916_002081	GGGCAGCTCGCCCTCGGGGGTCGAGTCGCCGTGGGTGTGGATGAGTTGGGGTGTGCGTGTTCATGCGAGTGCTTTTGGAAGGTGGGATGAAAGGGTGGCGGCGCCCCCCGCTTGCCCTCC	2	+	chr11:108782775-108782894
AXIN2	BA_678916_002082	GTGGGTGTGGATGAGTTGGGGTGTGCGTGTTCATGCGAGTGCTTTTGGAAGGTGGGATGAAAGGGTGGCGGCGCCCCCCGCTTGCCCTCCCCGCCCTTCCACCGCCCCCTCCCACTTCTT	2	+	chr11:108782805-108782924
AXIN2	BA_678916_002083	TCATGCGAGTGCTTTTGGAAGGTGGGATGAAAGGGTGGCGGCGCCCCCCGCTTGCCCTCCCCGCCCTTCCACCGCCCCCTCCCACTTCTTTCCCCACTAGTCTCCCCCTCCCATCCGCGG	2	+	chr11:108782835-108782954
AXIN2	BA_678916_002084	AAGGGTGGCGGCGCCCCCCGCTTGCCCTCCCCGCCCTTCCACCGCCCCCTCCCACTTCTTTCCCCACTAGTCTCCCCCTCCCATCCGCGGGTCCGCGCTTAGGTGCCGGGAGCGCTGGTG	2	+	chr11:108782865-108782984
AXIN2	BA_678916_002085	CCGCCCTTCCACCGCCCCCTCCCACTTCTTTCCCCACTAGTCTCCCCCTCCCATCCGCGGGTCCGCGCTTAGGTGCCGGGAGCGCTGGTGAAGGCTCAGTCTGAGGGTAGAACCGGCCAG	2	+	chr11:108782895-108783014
AXIN2	BA_678916_002086	TCCCCACTAGTCTCCCCCTCCCATCCGCGGGTCCGCGCTTAGGTGCCGGGAGCGCTGGTGAAGGCTCAGTCTGAGGGTAGAACCGGCCAGAGCCCAGGGCGCTCCCGTCCCCCCGTTCCT	2	+	chr11:108782925-108783044
AXIN2	BA_678916_002087	GTCCGCGCTTAGGTGCCGGGAGCGCTGGTGAAGGCTCAGTCTGAGGGTAGAACCGGCCAGAGCCCAGGGCGCTCCCGTCCCCCCGTTCCTCCTTGCCGCCCCTTTTGCGGAGAGGCCGAG	2	+	chr11:108782955-108783074
AXIN2	BA_678916_002088	AAGGCTCAGTCTGAGGGTAGAACCGGCCAGAGCCCAGGGCGCTCCCGTCCCCCCGTTCCTCCTTGCCGCCCCTTTTGCGGAGAGGCCGAGACTCCGCGCGTCGCCATTTCTGGACTAGGC	2	+	chr11:108782985-108783104
AXIN2	BA_678916_002089	AGCCCAGGGCGCTCCCGTCCCCCCGTTCCTCCTTGCCGCCCCTTTTGCGGAGAGGCCGAGACTCCGCGCGTCGCCATTTCTGGACTAGGCGGTTGCTTTCCGTGCCTTTTTCTGCGGGAA	2	+	chr11:108783015-108783134
AXIN2	BA_678916_002090	CCTTGCCGCCCCTTTTGCGGAGAGGCCGAGACTCCGCGCGTCGCCATTTCTGGACTAGGCGGTTGCTTTCCGTGCCTTTTTCTGCGGGAACCTCTGCGAGGCTTGACACCAGGGAGTTAC	1	+	chr11:108783045-108783164
AXIN2	BA_678916_002091	ACTCCGCGCGTCGCCATTTCTGGACTAGGCGGTTGCTTTCCGTGCCTTTTTCTGCGGGAACCTCTGCGAGGCTTGACACCAGGGAGTTACCCCCATCCGGGCTCCGGGGTCTCCGGCCTC	1	+	chr11:108783075-108783194
AXIN2	BA_678916_002092	GGTTGCTTTCCGTGCCTTTTTCTGCGGGAACCTCTGCGAGGCTTGACACCAGGGAGTTACCCCCATCCGGGCTCCGGGGTCTCCGGCCTCGCTCCTGGTGGACGGCATACCGGGACTCTG	2	+	chr11:108783105-108783224
AXIN2	BA_678916_002093	CCTCTGCGAGGCTTGACACCAGGGAGTTACCCCCATCCGGGCTCCGGGGTCTCCGGCCTCGCTCCTGGTGGACGGCATACCGGGACTCTGGAGGCTTTCGTTTGCAGTTGGGCCGGGGAG	2	+	chr11:108783135-108783254
AXIN2	BA_678916_002094	CCCCATCCGGGCTCCGGGGTCTCCGGCCTCGCTCCTGGTGGACGGCATACCGGGACTCTGGAGGCTTTCGTTTGCAGTTGGGCCGGGGAGGGACGGGACAGGAGGGGCTCAGAGGAGATG	2	+	chr11:108783165-108783284
AXIN2	BA_678916_002095	GCTCCTGGTGGACGGCATACCGGGACTCTGGAGGCTTTCGTTTGCAGTTGGGCCGGGGAGGGACGGGACAGGAGGGGCTCAGAGGAGATGAGAGCCTGGCGGCCTTCATCTTCCAGGTAA	1	+	chr11:108783195-108783314
AXIN2	BA_678916_002096	GAGGCTTTCGTTTGCAGTTGGGCCGGGGAGGGACGGGACAGGAGGGGCTCAGAGGAGATGAGAGCCTGGCGGCCTTCATCTTCCAGGTAACGGCGCCTCGCCACCTTCTCTGCGCCCGGG	2	+	chr11:108783225-108783344
AXIN2	BA_678916_002097	GGACGGGACAGGAGGGGCTCAGAGGAGATGAGAGCCTGGCGGCCTTCATCTTCCAGGTAACGGCGCCTCGCCACCTTCTCTGCGCCCGGGTGCGCGGCACTGTCCGGCCCCACCACTTCG	2	+	chr11:108783255-108783374
AXIN2	BA_678916_002098	AGAGCCTGGCGGCCTTCATCTTCCAGGTAACGGCGCCTCGCCACCTTCTCTGCGCCCGGGTGCGCGGCACTGTCCGGCCCCACCACTTCGGGTTTGTGCCCAGCCTGGCGGCCTGAGCTC	2	+	chr11:108783285-108783404
AXIN2	BA_678916_002099	CGGCGCCTCGCCACCTTCTCTGCGCCCGGGTGCGCGGCACTGTCCGGCCCCACCACTTCGGGTTTGTGCCCAGCCTGGCGGCCTGAGCTCCGGGACTGGGGTGGGGTGCATCGACCCAGA	2	+	chr11:108783315-108783434
AXIN2	BA_678916_002100	TGCGCGGCACTGTCCGGCCCCACCACTTCGGGTTTGTGCCCAGCCTGGCGGCCTGAGCTCCGGGACTGGGGTGGGGTGCATCGACCCAGACCCGGGGTCTCGGGCAGCTGGCCTGGCGTC	2	+	chr11:108783345-108783464
AXIN2	BA_678916_002101	GGTTTGTGCCCAGCCTGGCGGCCTGAGCTCCGGGACTGGGGTGGGGTGCATCGACCCAGACCCGGGGTCTCGGGCAGCTGGCCTGGCGTCCCTCCCTGTACCCCGGCCCGCCCCTCCTTA	2	+	chr11:108783375-108783494
AXIN2	BA_678916_002102	CGGGACTGGGGTGGGGTGCATCGACCCAGACCCGGGGTCTCGGGCAGCTGGCCTGGCGTCCCTCCCTGTACCCCGGCCCGCCCCTCCTTAGTTTGATCCTTCCCTGGCTAGGGAGAGAAG	2	+	chr11:108783405-108783524
AXIN2	BA_678916_002103	CCCGGGGTCTCGGGCAGCTGGCCTGGCGTCCCTCCCTGTACCCCGGCCCGCCCCTCCTTAGTTTGATCCTTCCCTGGCTAGGGAGAGAAGCTTGTTTATTGGTTAGATAAGACTTCTTTT	1	+	chr11:108783435-108783554
AXIN2	BA_678916_002104	CCTCCCTGTACCCCGGCCCGCCCCTCCTTAGTTTGATCCTTCCCTGGCTAGGGAGAGAAGCTTGTTTATTGGTTAGATAAGACTTCTTTTCTTTTGGAGAAAGGACTGGCTTGGGATCAG	1	+	chr11:108783465-108783584
AXIN2	BA_678916_002105	GTTTGATCCTTCCCTGGCTAGGGAGAGAAGCTTGTTTATTGGTTAGATAAGACTTCTTTTCTTTTGGAGAAAGGACTGGCTTGGGATCAGTGTAGTTTGGGATTCTTGGCACAGGCAGTA	1	+	chr11:108783495-108783614
AXIN2	BA_678916_002106	CTTGTTTATTGGTTAGATAAGACTTCTTTTCTTTTGGAGAAAGGACTGGCTTGGGATCAGTGTAGTTTGGGATTCTTGGCACAGGCAGTAGTAGCGTGAGAAGCCTTCTGATCCGGTTTT	1	+	chr11:108783525-108783644
AXIN2	BA_678916_002107	CTTTTGGAGAAAGGACTGGCTTGGGATCAGTGTAGTTTGGGATTCTTGGCACAGGCAGTAGTAGCGTGAGAAGCCTTCTGATCCGGTTTTGTTGGGTTCGTGGCTCTAGGAGGTGGACTG	1	+	chr11:108783555-108783674
AXIN2	BA_678916_002108	TGTAGTTTGGGATTCTTGGCACAGGCAGTAGTAGCGTGAGAAGCCTTCTGATCCGGTTTTGTTGGGTTCGTGGCTCTAGGAGGTGGACTGGGGAGCCGGGGGCGGCGGGTCTCGAGGTTT	1	+	chr11:108783585-108783704
AXIN2	BA_678916_002109	GTAGCGTGAGAAGCCTTCTGATCCGGTTTTGTTGGGTTCGTGGCTCTAGGAGGTGGACTGGGGAGCCGGGGGCGGCGGGTCTCGAGGTTTCTCTTCTCTCTTTAAAAGTTTGAAGATCAA	1	+	chr11:108783615-108783734
AXIN2	BA_678916_002110	GTTGGGTTCGTGGCTCTAGGAGGTGGACTGGGGAGCCGGGGGCGGCGGGTCTCGAGGTTTCTCTTCTCTCTTTAAAAGTTTGAAGATCAAAGCCTCTAAGTTAGTGAACTGGTTTCTGCT	1	+	chr11:108783645-108783764
AXIN2	BA_678916_002111	GGGAGCCGGGGGCGGCGGGTCTCGAGGTTTCTCTTCTCTCTTTAAAAGTTTGAAGATCAAAGCCTCTAAGTTAGTGAACTGGTTTCTGCTTTGGGGAGGCAAAGAAGACAAGAGGTGTAG	1	+	chr11:108783675-108783794
AXIN2	BA_678916_002112	CTCTTCTCTCTTTAAAAGTTTGAAGATCAAAGCCTCTAAGTTAGTGAACTGGTTTCTGCTTTGGGGAGGCAAAGAAGACAAGAGGTGTAGACTGAGCCACGTTTTTGGTGGAGTCTTGAG	1	+	chr11:108783705-108783824
AXIN2	BA_678916_002113	AGCCTCTAAGTTAGTGAACTGGTTTCTGCTTTGGGGAGGCAAAGAAGACAAGAGGTGTAGACTGAGCCACGTTTTTGGTGGAGTCTTGAGTTTAGGCAACATCATCGGGGGTGGGGGGTG	1	+	chr11:108783735-108783854
AXIN2	BA_678916_002114	TTGGGGAGGCAAAGAAGACAAGAGGTGTAGACTGAGCCACGTTTTTGGTGGAGTCTTGAGTTTAGGCAACATCATCGGGGGTGGGGGGTGCATGCCGAATCCGCGAGTCGCTGACCCCCT	1	+	chr11:108783765-108783884
AXIN2	BA_678916_002115	ACTGAGCCACGTTTTTGGTGGAGTCTTGAGTTTAGGCAACATCATCGGGGGTGGGGGGTGCATGCCGAATCCGCGAGTCGCTGACCCCCTTCCCGCCGATGCTGGGCGGGCTTTTTTTTT	1	+	chr11:108783795-108783914
AXIN2	BA_678916_002116	TTTAGGCAACATCATCGGGGGTGGGGGGTGCATGCCGAATCCGCGAGTCGCTGACCCCCTTCCCGCCGATGCTGGGCGGGCTTTTTTTTTTTTTTCCCCAGGCGGGGATCTTCTGTAAGA	1	+	chr11:108783825-108783944
AXIN2	BA_678916_002117	CATGCCGAATCCGCGAGTCGCTGACCCCCTTCCCGCCGATGCTGGGCGGGCTTTTTTTTTTTTTTCCCCAGGCGGGGATCTTCTGTAAGAAGTGGGACGAGGGAGCGCAGAAGGAGGGGG	1	+	chr11:108783855-108783974
AXIN2	BA_678916_002118	TCCCGCCGATGCTGGGCGGGCTTTTTTTTTTTTTTCCCCAGGCGGGGATCTTCTGTAAGAAGTGGGACGAGGGAGCGCAGAAGGAGGGGGGGGGGAATGGGAACCAGATGCCGGGGAAGG	1	+	chr11:108783885-108784004
AXIN2	BA_678916_002119	TTTTTCCCCAGGCGGGGATCTTCTGTAAGAAGTGGGACGAGGGAGCGCAGAAGGAGGGGGGGGGGAATGGGAACCAGATGCCGGGGAAGGGCACTTTGAGAACTCGAGTTATCTGTGCAG	1	+	chr11:108783915-108784034
AXIN2	BA_678916_002120	AGTGGGACGAGGGAGCGCAGAAGGAGGGGGGGGGGAATGGGAACCAGATGCCGGGGAAGGGCACTTTGAGAACTCGAGTTATCTGTGCAGAGCAGAGTGGGGAAGTTTACTGAAATTGGT	1	+	chr11:108783945-108784064
AXIN2	BA_678916_002121	GGGGGAATGGGAACCAGATGCCGGGGAAGGGCACTTTGAGAACTCGAGTTATCTGTGCAGAGCAGAGTGGGGAAGTTTACTGAAATTGGTTTCACCTGCACGCAGCCGGTCGGCTGGCTT	1	+	chr11:108783975-108784094
AXIN2	BA_678916_002122	GCACTTTGAGAACTCGAGTTATCTGTGCAGAGCAGAGTGGGGAAGTTTACTGAAATTGGTTTCACCTGCACGCAGCCGGTCGGCTGGCTTGCGTGTTCTGGTTGTCGTGGGAGTGGGTAC	1	+	chr11:108784005-108784124
AXIN2	BA_678916_002123	AGCAGAGTGGGGAAGTTTACTGAAATTGGTTTCACCTGCACGCAGCCGGTCGGCTGGCTTGCGTGTTCTGGTTGTCGTGGGAGTGGGTACGGCTAGACTACCTACCCGGCGTGTCCCTGG	1	+	chr11:108784035-108784154
AXIN2	BA_678916_002124	TTCACCTGCACGCAGCCGGTCGGCTGGCTTGCGTGTTCTGGTTGTCGTGGGAGTGGGTACGGCTAGACTACCTACCCGGCGTGTCCCTGGCCCCCGTGAATGCGGGGAAGGTTGTGTCTT	1	+	chr11:108784065-108784184
AXIN2	BA_678916_002125	GCGTGTTCTGGTTGTCGTGGGAGTGGGTACGGCTAGACTACCTACCCGGCGTGTCCCTGGCCCCCGTGAATGCGGGGAAGGTTGTGTCTTACACCTCCCGTGTCACTGTTTCTGCCTCAC	1	+	chr11:108784095-108784214
AXIN2	BA_678916_002126	GGCTAGACTACCTACCCGGCGTGTCCCTGGCCCCCGTGAATGCGGGGAAGGTTGTGTCTTACACCTCCCGTGTCACTGTTTCTGCCTCACCTTCCTCCTTCCACCCCCCAACACCACCCC	1	+	chr11:108784125-108784244
AXIN2	BA_678916_002127	CCCCCGTGAATGCGGGGAAGGTTGTGTCTTACACCTCCCGTGTCACTGTTTCTGCCTCACCTTCCTCCTTCCACCCCCCAACACCACCCCCCCCCCCCGCGGAAAAAGTGTGTGTGGAGC	1	+	chr11:108784155-108784274
AXIN2	BA_678916_002128	ACACCTCCCGTGTCACTGTTTCTGCCTCACCTTCCTCCTTCCACCCCCCAACACCACCCCCCCCCCCCGCGGAAAAAGTGTGTGTGGAGCTCAGATTTCGCCTTTGAAAAAGCTGCGTCG	1	+	chr11:108784185-108784304
AXIN2	BA_678916_002129	CTTCCTCCTTCCACCCCCCAACACCACCCCCCCCCCCCGCGGAAAAAGTGTGTGTGGAGCTCAGATTTCGCCTTTGAAAAAGCTGCGTCGGATACTTGAGACGAGCACCTCGCGGATAGC	1	+	chr11:108784215-108784334
AXIN2	BA_678916_002130	CCCCCCCCGCGGAAAAAGTGTGTGTGGAGCTCAGATTTCGCCTTTGAAAAAGCTGCGTCGGATACTTGAGACGAGCACCTCGCGGATAGCTGGGTTGCTTGATTTGAATTTGAGGAGTTG	1	+	chr11:108784245-108784364
AXIN2	BA_678916_002131	TCAGATTTCGCCTTTGAAAAAGCTGCGTCGGATACTTGAGACGAGCACCTCGCGGATAGCTGGGTTGCTTGATTTGAATTTGAGGAGTTGAAAAGCCTGTTTACTTTCTTGCTTTGATGT	1	+	chr11:108784275-108784394
AXIN2	BA_678916_002132	GATACTTGAGACGAGCACCTCGCGGATAGCTGGGTTGCTTGATTTGAATTTGAGGAGTTGAAAAGCCTGTTTACTTTCTTGCTTTGATGTTGGGTAGATCTGGTTTTGATTAGATCAATA	1	+	chr11:108784305-108784424
AXIN2	BA_678916_002133	TGGGTTGCTTGATTTGAATTTGAGGAGTTGAAAAGCCTGTTTACTTTCTTGCTTTGATGTTGGGTAGATCTGGTTTTGATTAGATCAATACCCTTTTCTCTCTCCCCCCTCCCCCCTCCT	1	+	chr11:108784335-108784454
AXIN2	BA_678916_002134	AAAAGCCTGTTTACTTTCTTGCTTTGATGTTGGGTAGATCTGGTTTTGATTAGATCAATACCCTTTTCTCTCTCCCCCCTCCCCCCTCCTTTTCTTTCCAGAGAGGAGGCTCACATGAGC	1	+	chr11:108784365-108784484
AXIN2	BA_678916_002135	TGGGTAGATCTGGTTTTGATTAGATCAATACCCTTTTCTCTCTCCCCCCTCCCCCCTCCTTTTCTTTCCAGAGAGGAGGCTCACATGAGCCCCTGCTGACTTAAGAGAGACCAAGCCGAT	1	+	chr11:108784395-108784514
AXIN2	BA_678916_002136	CCCTTTTCTCTCTCCCCCCTCCCCCCTCCTTTTCTTTCCAGAGAGGAGGCTCACATGAGCCCCTGCTGACTTAAGAGAGACCAAGCCGATTGCTGAGAGGAACTGGAAGAAGAAAAAGGA	1	+	chr11:108784425-108784544
B3GNT5	BA_593036_008942	CCCATGTGCCTACCTATATAAACTGACACATGTAACTAGTTCCAAATGACCGAAAAGGAACAAAGTCCCACTTGAATATATGTATGTGAATACAAAATACACATGTGTTTTAGGGAGGAC	1	+	chr16:19759451-19759570
B3GNT5	BA_593036_008943	CAAAGTCCCACTTGAATATATGTATGTGAATACAAAATACACATGTGTTTTAGGGAGGACCATATAAAGGATTAGTCAGGATTTAAGAAGATAATTGGGGGGTGATTAACCCTGTAGGAA	1	+	chr16:19759511-19759630
B3GNT5	BA_593036_008944	CATATAAAGGATTAGTCAGGATTTAAGAAGATAATTGGGGGGTGATTAACCCTGTAGGAACAATGAATGCTCCTCTTTATAGATCACTGTCAGACTCCATTAGGAGTCCCATTACATTAG	1	+	chr16:19759571-19759690
B3GNT5	BA_593036_008945	CAATGAATGCTCCTCTTTATAGATCACTGTCAGACTCCATTAGGAGTCCCATTACATTAGTATTTCTGCTTGTGGTCTTCTGGACAGGTGAGTTAACAGCGAACCATGCCTTGTGTGAGT	1	+	chr16:19759631-19759750
B3GNT5	BA_593036_008946	TATTTCTGCTTGTGGTCTTCTGGACAGGTGAGTTAACAGCGAACCATGCCTTGTGTGAGTAACACATGAAAAGAATTTCAGGATTGGAAATACGCTGAAGGGCTTTTAAAATGCAGTTGC	1	+	chr16:19759691-19759810
B3GNT5	BA_593036_008947	AACACATGAAAAGAATTTCAGGATTGGAAATACGCTGAAGGGCTTTTAAAATGCAGTTGCAAAATCTCCTAAAACTAGAGTTTGAAATAACAAGTGTGTTTTAAACTGATTCAGCAACTA	1	+	chr16:19759751-19759870
B3GNT5	BA_593036_008948	AAAATCTCCTAAAACTAGAGTTTGAAATAACAAGTGTGTTTTAAACTGATTCAGCAACTACTTTGAACTTACTGACTTTTACAATTACAAACCCATATTTGGACTTGACATTTTTGGATT	1	+	chr16:19759811-19759930
B3GNT5	BA_593036_008949	CTTTGAACTTACTGACTTTTACAATTACAAACCCATATTTGGACTTGACATTTTTGGATTTTTTTTCTTGTCCTGTTTTCAGTATGTATAACTACAAAACTGCTCAAAATAGGAGCTCTA	1	+	chr16:19759871-19759990
B3GNT5	BA_593036_008950	TTTTTTCTTGTCCTGTTTTCAGTATGTATAACTACAAAACTGCTCAAAATAGGAGCTCTATTGAATGCTTCTATAAGGAAAAGTCTAGAACAGCATTTTTTTAAGCAAGCAATTAGCTAC	1	+	chr16:19759931-19760050
B3GNT5	BA_593036_008951	TTTACTTGCTCCTTCAGCTGATGTCTACACTATCCTGATAATGTCTGGTTACAGGCCGAACAAGAACTTTCCTTTGGGCTCAGGTGCACATTTGGTCTTCTGAATCTATAGTTTAGTTAT	1	+	chr16:19760076-19760195
B3GNT5	BA_593036_008952	CAAGAACTTTCCTTTGGGCTCAGGTGCACATTTGGTCTTCTGAATCTATAGTTTAGTTATTAGCAAACAAGTGAGGCAATCGCTTCCTGGAGTCCTCACAGATAGCACTTTAGGGCGGGG	1	+	chr16:19760136-19760255
B3GNT5	BA_593036_008953	TAGCAAACAAGTGAGGCAATCGCTTCCTGGAGTCCTCACAGATAGCACTTTAGGGCGGGGCACGTCACCTTCACAGACCGGGGTAGGGGAGGGGCGGGGCTGAGCATTCCCGAGGAAGCC	1	+	chr16:19760196-19760315
B3GNT5	BA_593036_008954	CACGTCACCTTCACAGACCGGGGTAGGGGAGGGGCGGGGCTGAGCATTCCCGAGGAAGCCTGGAGTGGAGTGACCAAATAAGCAGCTGGAGGCTCCTGCGGCTGCGCCCCAGCCTGAGTG	2	+	chr16:19760256-19760375
B3GNT5	BA_593036_008955	TGGAGTGGAGTGACCAAATAAGCAGCTGGAGGCTCCTGCGGCTGCGCCCCAGCCTGAGTGAGCCAAGACCCTTAATCAGGCCCGCCCCTCTCAGCCGGCTCTAGCCGGCTCCAGCGGGGT	2	+	chr16:19760316-19760435
B3GNT5	BA_593036_008956	AGCCAAGACCCTTAATCAGGCCCGCCCCTCTCAGCCGGCTCTAGCCGGCTCCAGCGGGGTCTCTCTTGGAGCCCTGCCCTAGCTTCCTCGCTTACAACCGAAATTTAGTTTGCAACTTTT	1	+	chr16:19760376-19760495
B3GNT5	BA_593036_008957	CTCTCTTGGAGCCCTGCCCTAGCTTCCTCGCTTACAACCGAAATTTAGTTTGCAACTTTTGTTCTTGAGACTTTTCCCCCAGGGCTTCTAGGAGGACAGCGGACCTCTGGGACATTTAAG	1	+	chr16:19760436-19760555
B3GNT5	BA_593036_008958	GTTCTTGAGACTTTTCCCCCAGGGCTTCTAGGAGGACAGCGGACCTCTGGGACATTTAAGGACTTGGGTTCCTCGGTGAGTTTTACAATGCTTGAAATTCCCTGGGTTGGAATGTAAATC	1	+	chr16:19760496-19760615
B3GNT5	BA_593036_008959	GACTTGGGTTCCTCGGTGAGTTTTACAATGCTTGAAATTCCCTGGGTTGGAATGTAAATCAATGGGGAGGCTGAACACAGGGGAAGGGTCTGCTTTTAAAACGAACTGTTGCTGTGCAGT	1	+	chr16:19760556-19760675
B3GNT5	BA_593036_008960	AATGGGGAGGCTGAACACAGGGGAAGGGTCTGCTTTTAAAACGAACTGTTGCTGTGCAGTCATAAGGCGTGCAGTCTTCGCTTCAAATAAATGTGCGTTTCCTTTCTTTGTTACTTAGGC	1	+	chr16:19760616-19760735
B3GNT5	BA_593036_008961	CATAAGGCGTGCAGTCTTCGCTTCAAATAAATGTGCGTTTCCTTTCTTTGTTACTTAGGCTCCCAGGAGCTCAAGTCCTAAGTGTCCTGACAGAAGACCGGCGGGCTCTTAGGGTTTGCT	1	+	chr16:19760676-19760795
B3GNT5	BA_593036_008962	TCCCAGGAGCTCAAGTCCTAAGTGTCCTGACAGAAGACCGGCGGGCTCTTAGGGTTTGCTAGGAAACTACGAGACGATGGGAGAACCGCTGTCCACTCAAAACCTTCAGCTCGGAAATGA	1	+	chr16:19760736-19760855
B3GNT5	BA_593036_008963	AGGAAACTACGAGACGATGGGAGAACCGCTGTCCACTCAAAACCTTCAGCTCGGAAATGACTAACTGAAACGTGGTTTGGATGAATGGGTCTCCAGTCTTAACCAACGCCGCTCCTGGAT	1	+	chr16:19760796-19760915
B3GNT5	BA_593036_008964	CTAACTGAAACGTGGTTTGGATGAATGGGTCTCCAGTCTTAACCAACGCCGCTCCTGGATGAAAGGTCAGTCACTGCCCACCCAAAGTGCCCGCTGCATCCTACTGTGAGCCAAGGTCCC	1	+	chr16:19760856-19760975
B3GNT5	BA_593036_008965	GAAAGGTCAGTCACTGCCCACCCAAAGTGCCCGCTGCATCCTACTGTGAGCCAAGGTCCCTCTGTCGGGGAGCGTGGCTTCGCAGTCTGCTTTAGACCGGGCACTCTCGAAGCCCCTGCA	1	+	chr16:19760916-19761035
B3GNT5	BA_593036_008966	TCTGTCGGGGAGCGTGGCTTCGCAGTCTGCTTTAGACCGGGCACTCTCGAAGCCCCTGCAGAGTCTAAGTCTCTGGCTGGGCTAGCTTTGTGCCGGCTCTGAGGTTCTCCCCGAGGCTGC	1	+	chr16:19760976-19761095
B3GNT5	BA_593036_008967	GAGTCTAAGTCTCTGGCTGGGCTAGCTTTGTGCCGGCTCTGAGGTTCTCCCCGAGGCTGCTAGCTGAGAGTCCCGGGACCCGCCCCACCTCTAGCTTCCCCTCCTCTAGCCCGGACCCGA	2	+	chr16:19761036-19761155
B3GNT5	BA_593036_008968	TAGCTGAGAGTCCCGGGACCCGCCCCACCTCTAGCTTCCCCTCCTCTAGCCCGGACCCGACCGGGAGGCGGGAAGGGGTGCAGAGGGTAGTCCACACGGGCGGCCCGGGGGCATCAGGGT	2	+	chr16:19761096-19761215
B3GNT5	BA_593036_008969	CCGGGAGGCGGGAAGGGGTGCAGAGGGTAGTCCACACGGGCGGCCCGGGGGCATCAGGGTGGAATGGTCAGGAAGACAGACGGCTCTTCGTTGCGAGCCGGGGCTTCCCGGTCCGGAGGT	2	+	chr16:19761156-19761275
B3GNT5	BA_593036_008970	GGAATGGTCAGGAAGACAGACGGCTCTTCGTTGCGAGCCGGGGCTTCCCGGTCCGGAGGTGCAGCGAAGAAGGGAGAGTTCCCTCGGCGAGCGCCTTTGTTCACTGCGGCCTGGTGGGCG	2	+	chr16:19761216-19761335
B3GNT5	BA_593036_008971	GCAGCGAAGAAGGGAGAGTTCCCTCGGCGAGCGCCTTTGTTCACTGCGGCCTGGTGGGCGCGAGCGCTGGGCGGCGACCACCCTAGGCCTAGCTGCCGCTTTTGTGCCGCAGGTACGATC	2	+	chr16:19761276-19761395
B3GNT5	BA_593036_008972	CGAGCGCTGGGCGGCGACCACCCTAGGCCTAGCTGCCGCTTTTGTGCCGCAGGTACGATCCGACCCGCGGGGTCCAGAGCACCGGATTTACCCGGAATGCCAATGGGGAGAGGTGGCTGT	2	+	chr16:19761336-19761455
B3GNT5	BA_593036_008973	CGACCCGCGGGGTCCAGAGCACCGGATTTACCCGGAATGCCAATGGGGAGAGGTGGCTGTGGTGTCGCGAAGCCAGGTCCAGCCTTGGCGCATCTTCAGTCTGGGTCCTGAGATTTATCA	1	+	chr16:19761396-19761515
B3GNT5	BA_593036_008974	GGTGTCGCGAAGCCAGGTCCAGCCTTGGCGCATCTTCAGTCTGGGTCCTGAGATTTATCAATGCTGGATTGAATTCGGGCTGACCGCCTAGGGTAGCTTGCACGTGAGGGAGCTGACCGG	1	+	chr16:19761456-19761575
B3GNT5	BA_593036_008975	ATGCTGGATTGAATTCGGGCTGACCGCCTAGGGTAGCTTGCACGTGAGGGAGCTGACCGGCTCTTTGGAATAGCTGCTAGCTGGAAAAGAAAAAAGAAAAGAAAACGGGAAAGCAGGCGG	1	+	chr16:19761516-19761635
B3GNT5	BA_593036_008976	CTCTTTGGAATAGCTGCTAGCTGGAAAAGAAAAAAGAAAAGAAAACGGGAAAGCAGGCGGGTAGGAGAAATTGGGAAAAGATCTTTCTAATGAGAATCTCCTGTTTACTCCCATTTTCTT	1	+	chr16:19761576-19761695
B3GNT5	BA_593036_008977	GTAGGAGAAATTGGGAAAAGATCTTTCTAATGAGAATCTCCTGTTTACTCCCATTTTCTTTAATATACTAGTAAAGTGATTGTTCAGATACCCGTAGATAAAAGTAACAGCTTTTGATTC	1	+	chr16:19761636-19761755
B3GNT5	BA_593036_008978	TAATATACTAGTAAAGTGATTGTTCAGATACCCGTAGATAAAAGTAACAGCTTTTGATTCACATTCTTTACAGCAGTAATGGTTTTCTTAGGTTATGGGTCATGTTACAGGGACACAGAT	1	+	chr16:19761696-19761815
B3GNT5	BA_593036_008979	ACATTCTTTACAGCAGTAATGGTTTTCTTAGGTTATGGGTCATGTTACAGGGACACAGATGCCATCACAAGGTAGTCAGTGGTGGTAGAGCTAATTTTTAGGCTAACTTTCTGGTGAAAG	1	+	chr16:19761756-19761875
B3GNT5	BA_593036_008980	GCCATCACAAGGTAGTCAGTGGTGGTAGAGCTAATTTTTAGGCTAACTTTCTGGTGAAAGTACATTCATTAAAATTAGATTTGCTCCTCTGTGCCTTTATTTTGGGAAACAGTCTGGTCC	1	+	chr16:19761816-19761935
B3GNT5	BA_593036_008981	TACATTCATTAAAATTAGATTTGCTCCTCTGTGCCTTTATTTTGGGAAACAGTCTGGTCCCCAGGGGCAGAGATGCCAGGAAGTGGTATATGAGAAAGTGAAACTGGCCCAGAAAAGTAT	1	+	chr16:19761876-19761995
B3GNT5	BA_593036_008982	CCAGGGGCAGAGATGCCAGGAAGTGGTATATGAGAAAGTGAAACTGGCCCAGAAAAGTATGATTGAAGGTAGTGGTGCAGAAAATGACCCCACCCTTAACACTGAAAGGGTGATTTGTAA	1	+	chr16:19761936-19762055
B3GNT5	BA_593036_008983	GATTGAAGGTAGTGGTGCAGAAAATGACCCCACCCTTAACACTGAAAGGGTGATTTGTAAACAGTTGGTAAGTGTGGACTTCATCAAAAGGCAGCAGGGGATACAGGCTTGCAAGTCTGA	1	+	chr16:19761996-19762115
B3GNT5	BA_593036_008984	ACAGTTGGTAAGTGTGGACTTCATCAAAAGGCAGCAGGGGATACAGGCTTGCAAGTCTGACTTTGGGTTCAATCTCTAGCACGAAGGAAAAGTTTGTCAAAAGAAATGTAGGGCATAGTG	1	+	chr16:19762056-19762175
BGN	BA_593036_009392	GTTGAGGTTTGGCAGCCTAGCCCTGTTAGGTCCTGAAATTGAAGGAAGGAAATGCTCATAAGAGAGACCATGGTTACTGCATCCTGGCCGGCCAGTAGGGGTTGAGCAAGAAGATAAGGA	1	+	chrx:70728173-70728292
BGN	BA_593036_009393	AGAGAGACCATGGTTACTGCATCCTGGCCGGCCAGTAGGGGTTGAGCAAGAAGATAAGGAGCTTGTTTCTCTCCTCCAAATCAGCTTTGCCAACTTCTCAAAGGCTTCAGGGATGTGAGC	1	+	chrx:70728233-70728352
BGN	BA_593036_009394	GCTTGTTTCTCTCCTCCAAATCAGCTTTGCCAACTTCTCAAAGGCTTCAGGGATGTGAGCCAAGAAGGCCTGCAGAAACTTGGGGTGGGGGTGGGGGGCAAATGCCTCGTTTTAAAGGAG	1	+	chrx:70728293-70728412
BGN	BA_593036_009395	CAAGAAGGCCTGCAGAAACTTGGGGTGGGGGTGGGGGGCAAATGCCTCGTTTTAAAGGAGGAAAGGAAGGAGAAGAGGAAAGGCTAACAGAGCCAGTGGGATCCTGGATCAAGCCCTTCC	1	+	chrx:70728353-70728472
BGN	BA_593036_009396	GAAAGGAAGGAGAAGAGGAAAGGCTAACAGAGCCAGTGGGATCCTGGATCAAGCCCTTCCAGAAGCCTACCATCCTCTACATCTATAATCCCCAAAGTGCCCCTGGCTTCAGACTTAAGT	1	+	chrx:70728413-70728532
BGN	BA_593036_009397	AGAAGCCTACCATCCTCTACATCTATAATCCCCAAAGTGCCCCTGGCTTCAGACTTAAGTTCTGGGTAGCCATCAGGTTACCTTTCCTCATCTTCCTCTCACTTTCTTCTGCCTAGCCCC	1	+	chrx:70728473-70728592
BGN	BA_593036_009398	TCTGGGTAGCCATCAGGTTACCTTTCCTCATCTTCCTCTCACTTTCTTCTGCCTAGCCCCACAACAGCAAGCACCTCAGTGTCCCCTTTTGGATAGTGGAAAGTTTGACTCTGTGAGACT	1	+	chrx:70728533-70728652
BGN	BA_593036_009399	ACAACAGCAAGCACCTCAGTGTCCCCTTTTGGATAGTGGAAAGTTTGACTCTGTGAGACTGTCTGCCCAAAGACACCAAGGGTCTGTCCCTAAGTAAGTGAATGTGTGTTCTTTCAAACT	1	+	chrx:70728593-70728712
BGN	BA_593036_009400	GTCTGCCCAAAGACACCAAGGGTCTGTCCCTAAGTAAGTGAATGTGTGTTCTTTCAAACTATGCTTGAGGCAGGGGCCAGGGTGGGGGGCGTGAGGGGGAGGGGTGCCACATAGACCAGC	1	+	chrx:70728653-70728772
BGN	BA_593036_009401	ATGCTTGAGGCAGGGGCCAGGGTGGGGGGCGTGAGGGGGAGGGGTGCCACATAGACCAGCCGTCTACAAGAAAATTGCTTCCTTTGAAGCTGCCAGGGGGGGCAGGAAGCCTGCCCCCTC	1	+	chrx:70728713-70728832
BGN	BA_593036_009402	CTCTCTCCACGAACTGCCCAGGAGCGAGCAGCTGCTCCCGGTTGGCCCTGACGGACAGACAAACCGACAGCCTGACAACCTAGTCCACCAACTAAGCAGCCTGCACCTGGCTGCTTGTCC	1	+	chrx:70728974-70729093
BGN	BA_593036_009403	AAACCGACAGCCTGACAACCTAGTCCACCAACTAAGCAGCCTGCACCTGGCTGCTTGTCCCTCCCCAGGTAGGGCCTGCTCACGCCGGGAACTGACTCCACTCTCTCGACAAAGACTTCC	1	+	chrx:70729034-70729153
BGN	BA_593036_009404	CTCCCCAGGTAGGGCCTGCTCACGCCGGGAACTGACTCCACTCTCTCGACAAAGACTTCCATCTGTCCTCCCTGTCTTCATTTCTGGCTATGCTGTACCCTCATCAGCCAAAGATGTTGG	1	+	chrx:70729094-70729213
BGN	BA_593036_009405	ATCTGTCCTCCCTGTCTTCATTTCTGGCTATGCTGTACCCTCATCAGCCAAAGATGTTGGCAATCCTGCTGTCTCCACACCAGCCCTGCCGCATCTAGTCTTGCCGCCCCAGTGTCTATA	1	+	chrx:70729154-70729273
BGN	BA_593036_009406	CAATCCTGCTGTCTCCACACCAGCCCTGCCGCATCTAGTCTTGCCGCCCCAGTGTCTATACTTCCACTGTCTCCTTGCTGCTCTCTATATTCCCCCAGGGCACCCACCAAAGGCTTTGTG	1	+	chrx:70729214-70729333
BGN	BA_593036_009407	CTTCCACTGTCTCCTTGCTGCTCTCTATATTCCCCCAGGGCACCCACCAAAGGCTTTGTGTCCTTTTCATCAACACCACATTTCTGCCTCTTCTCCCCACGCTCTTCCCTGAACTTTCTT	1	+	chrx:70729274-70729393
BGN	BA_593036_009408	TCCTTTTCATCAACACCACATTTCTGCCTCTTCTCCCCACGCTCTTCCCTGAACTTTCTTCCTACCCTTCCTTTCCCTTTCCTCTCTGACAGTGCCCAGTTGCTAAGCTCACCTATGCGT	1	+	chrx:70729334-70729453
BGN	BA_593036_009409	CCTACCCTTCCTTTCCCTTTCCTCTCTGACAGTGCCCAGTTGCTAAGCTCACCTATGCGTTGCTTCTCTGCTTCTGGGGATGGACAGGGAGCTCCCCCAGGGTGCTGCCCAGAGCACTGA	1	+	chrx:70729394-70729513
BGN	BA_593036_009410	TGCTTCTCTGCTTCTGGGGATGGACAGGGAGCTCCCCCAGGGTGCTGCCCAGAGCACTGAGGCAGGGCTGGGTGGATGGCTAAGCTCTACCCATAGTCCTATCCCTTCATGGCAAGGCCC	1	+	chrx:70729454-70729573
BGN	BA_593036_009411	GGCAGGGCTGGGTGGATGGCTAAGCTCTACCCATAGTCCTATCCCTTCATGGCAAGGCCCAGGCACACCCTTCACTCCTGCTAGCCTTGCTCTCCCAGCTCAGCCTTTCTTGGGGTCTTG	1	+	chrx:70729514-70729633
BGN	BA_593036_009412	AGGCACACCCTTCACTCCTGCTAGCCTTGCTCTCCCAGCTCAGCCTTTCTTGGGGTCTTGGCACCTGGCCAGGTCAGGGAGGATGGAGCCAATGCAAAACTCAGCATTGGCACAGTCTCC	1	+	chrx:70729574-70729693
BGN	BA_593036_009413	GCACCTGGCCAGGTCAGGGAGGATGGAGCCAATGCAAAACTCAGCATTGGCACAGTCTCCCCTTGGAGTAGTCAGAGACACTTGTGCTCCCAGGCACACCTCAGGCACCTTGCCCTAATA	1	+	chrx:70729634-70729753
BGN	BA_593036_009414	CCTTGGAGTAGTCAGAGACACTTGTGCTCCCAGGCACACCTCAGGCACCTTGCCCTAATATTCCATACTCACCATAGACTAATGTTCTGCTTCCTCTTGAGCTGAGATGCACAATGGGCA	1	+	chrx:70729694-70729813
BGN	BA_593036_009415	TTCCATACTCACCATAGACTAATGTTCTGCTTCCTCTTGAGCTGAGATGCACAATGGGCAGATGATGGGATGGGGGTAGAAAATGGGGAAATTGTGCCATGTTTCCAGGAAGAAAACGTG	1	+	chrx:70729754-70729873
BGN	BA_593036_009416	GATGATGGGATGGGGGTAGAAAATGGGGAAATTGTGCCATGTTTCCAGGAAGAAAACGTGGCTTAGAGCCCTGAGGAGCCTGTCAAGAGACTCAGAAGAAGAAGCAAGACAGACAGAGTC	1	+	chrx:70729814-70729933
BGN	BA_593036_009417	GCTTAGAGCCCTGAGGAGCCTGTCAAGAGACTCAGAAGAAGAAGCAAGACAGACAGAGTCAACTGGGCATTAACCAAGTCTGGTGAAGGTTAGCGGACTGGAGTACCTAGAATAAGAGGT	1	+	chrx:70729874-70729993
BGN	BA_593036_009418	AACTGGGCATTAACCAAGTCTGGTGAAGGTTAGCGGACTGGAGTACCTAGAATAAGAGGTCCAGAGCTGTAGGTAGGGCAGGCAGAGGAAATCTTTATTAGGCCAAGGGCACCTGGGTGA	1	+	chrx:70729934-70730053
BGN	BA_593036_009419	CCAGAGCTGTAGGTAGGGCAGGCAGAGGAAATCTTTATTAGGCCAAGGGCACCTGGGTGACTCCAATTTCATGTTTAGGAGCTGTTGCCTCTCTAGTCTGCCAGTTTTCTGCCTTGAAAT	1	+	chrx:70729994-70730113
BGN	BA_593036_009420	CTCCAATTTCATGTTTAGGAGCTGTTGCCTCTCTAGTCTGCCAGTTTTCTGCCTTGAAATGACTGAAATTGAGACACACTTAAGATGTTCCCTATGCTAGCAAGAGTCCTAAGGGCTGGC	1	+	chrx:70730054-70730173
BGN	BA_593036_009421	GACTGAAATTGAGACACACTTAAGATGTTCCCTATGCTAGCAAGAGTCCTAAGGGCTGGCATCTGGACATGCAATCAGTTGCCTGTACCACCTACACCCTAGGAGAGCTTGTGGGTGGGC	1	+	chrx:70730114-70730233
BGN	BA_593036_009422	ATCTGGACATGCAATCAGTTGCCTGTACCACCTACACCCTAGGAGAGCTTGTGGGTGGGCATGGTTGCTTTGTGTAAAACATGACTGTGTATTGCTGCTGAAGGCTAAAGCCGGGGTTGA	1	+	chrx:70730174-70730293
BGN	BA_593036_009423	ATGGTTGCTTTGTGTAAAACATGACTGTGTATTGCTGCTGAAGGCTAAAGCCGGGGTTGAGGGGGGGCTTTGAGGACAGGTAATGCGGATATACTGATAGAAGGATGTGGGTCTGCCTCT	1	+	chrx:70730234-70730353
BGN	BA_593036_009424	GGGGGGGCTTTGAGGACAGGTAATGCGGATATACTGATAGAAGGATGTGGGTCTGCCTCTAAGCCACAAGGGTAAGGCAGCATGAGGAGGCTCTGATCCAGGCAGTAGAGAGGGCGTCAT	1	+	chrx:70730294-70730413
BGN	BA_593036_009425	AAGCCACAAGGGTAAGGCAGCATGAGGAGGCTCTGATCCAGGCAGTAGAGAGGGCGTCATAGCCAGCTGGCTGCCTGGGTGTGGCAGCTGGGCCTCTCTGGCCCACTCCTACACTGACTT	1	+	chrx:70730354-70730473
BGN	BA_593036_009426	AGCCAGCTGGCTGCCTGGGTGTGGCAGCTGGGCCTCTCTGGCCCACTCCTACACTGACTTTCTCTCCACCCCAAAGGACTTGAGTCTACCACTGCTTCTCTTCCCTACCCAGAACAAGGA	1	+	chrx:70730414-70730533
BGN	BA_593036_009427	TCTCTCCACCCCAAAGGACTTGAGTCTACCACTGCTTCTCTTCCCTACCCAGAACAAGGACCAAGGTCCTACTACATGCAAAGTGAATCGGAACCATGGAGTTTAGAATTTAGAAGCCCA	1	+	chrx:70730474-70730593
BGN	BA_593036_009428	CCAAGGTCCTACTACATGCAAAGTGAATCGGAACCATGGAGTTTAGAATTTAGAAGCCCAGATGGGTATGCCAGCCAGTGACCATCATGTCAAGTAATCTGCTATAACTGACCAAAAATT	1	+	chrx:70730534-70730653
BGN	BA_593036_009429	GATGGGTATGCCAGCCAGTGACCATCATGTCAAGTAATCTGCTATAACTGACCAAAAATTTTTTTCAATCCCTCTAAAATCCTATGCTGTTGGGGGATTGGCAACATGGTGGAATAGAAG	1	+	chrx:70730594-70730713
BGN	BA_593036_009430	TTTTTCAATCCCTCTAAAATCCTATGCTGTTGGGGGATTGGCAACATGGTGGAATAGAAGGGAAAGGGATGCTGTGGAGGTAAGAAAGAGCTTTTTTCAGCAATATTCTATAGTCCTCCA	1	+	chrx:70730654-70730773
BGN	BA_593036_009431	GGAAAGGGATGCTGTGGAGGTAAGAAAGAGCTTTTTTCAGCAATATTCTATAGTCCTCCAGTCATAGCATCAAATCCTCTGAAGAGAGATTTGTAATGAGGCTATATTTGACAATTTGCA	1	+	chrx:70730714-70730833
BGN	BA_593036_009432	GTCATAGCATCAAATCCTCTGAAGAGAGATTTGTAATGAGGCTATATTTGACAATTTGCACTGGGATACTCTCCAGAAGACTTGTTTTTTGTCACATTGTTTTGGGATGGGATGGGGACT	1	+	chrx:70730774-70730893
BGN	BA_593036_009433	CTGGGATACTCTCCAGAAGACTTGTTTTTTGTCACATTGTTTTGGGATGGGATGGGGACTAGACTCCATTCCAATCTCCCTTTTGCCTGGGCTCATCCACCATGGTCTTTCACTTTTTCT	1	+	chrx:70730834-70730953
BGN	BA_593036_009434	AGACTCCATTCCAATCTCCCTTTTGCCTGGGCTCATCCACCATGGTCTTTCACTTTTTCTCCCTGTAGAAACAGAGTACCATAAGTCTGTCCCAGGAGTCACTTGTCCTTGGTCCACAGA	1	+	chrx:70730894-70731013
BGN	BA_593036_009435	CCCTGTAGAAACAGAGTACCATAAGTCTGTCCCAGGAGTCACTTGTCCTTGGTCCACAGATTCTCAGCATGCCTCCCTAATGAGGCCAAAATACCAAGGAAGCTTCCTTGTCAACCCCCC	1	+	chrx:70730954-70731073
BGN	BA_593036_009436	TTCTCAGCATGCCTCCCTAATGAGGCCAAAATACCAAGGAAGCTTCCTTGTCAACCCCCCCCCCATTACCTCCACACCCACCATGACTCCCTCCTGCTCTTCCTCCTTTGTCCCTGCTCT	1	+	chrx:70731014-70731133
BGN	BA_593036_009437	CCCCATTACCTCCACACCCACCATGACTCCCTCCTGCTCTTCCTCCTTTGTCCCTGCTCTCAAATGCCCCACCCATTTTCTAGTGGGGGCCTCACATTCCAACAGTCCTGGCAGCAGGTC	1	+	chrx:70731074-70731193
BGN	BA_593036_009438	CAAATGCCCCACCCATTTTCTAGTGGGGGCCTCACATTCCAACAGTCCTGGCAGCAGGTCTTCTCCATTGTAGGGAGGTCAGTTGGTTGTAGAGAGACACCCCAGCACAGGACCTCACTC	1	+	chrx:70731134-70731253
BGN	BA_593036_009439	TTCTCCATTGTAGGGAGGTCAGTTGGTTGTAGAGAGACACCCCAGCACAGGACCTCACTCACACCAAGGAATAGGGGCAGTGTGAATGAATGATCCTGGAAGACTGAAGATGATCTTGGC	1	+	chrx:70731194-70731313
BGN	BA_593036_009440	ACACCAAGGAATAGGGGCAGTGTGAATGAATGATCCTGGAAGACTGAAGATGATCTTGGCCCTTCCTGGCTGAATGCATAAGGCTGAATCCCATTCTAGCCAGAGTTCCTAGCAAGCAGT	1	+	chrx:70731254-70731373
BGN	BA_593036_009441	CCTTCCTGGCTGAATGCATAAGGCTGAATCCCATTCTAGCCAGAGTTCCTAGCAAGCAGTAGAGAACCTGGTGTTGGGGAAAGAGTTTGAGAACCCCAAGACATGAGCAGAAAGGGGGAT	1	+	chrx:70731314-70731433
BHLHA9	BA_593036_010376	ATCTTGTTTAAAATTCCAGTCCTCAGTGACAGCGATGGAGAGAGTGCCCTGGATTCCTAACCTGACCTTACTCTGTAGAGGGACTGGGCTGCTTAAAGGCCCTGGACATTAAGAGTTGCT	1	+	chr11:76485117-76485236
BHLHA9	BA_593036_010377	CCTGACCTTACTCTGTAGAGGGACTGGGCTGCTTAAAGGCCCTGGACATTAAGAGTTGCTCCCTGATGGGTATTGCAAGGGAAGCCAGACATAAAAGTCCTCATCACTCTTTGCTTCTGA	1	+	chr11:76485177-76485296
BHLHA9	BA_593036_010378	CCCTGATGGGTATTGCAAGGGAAGCCAGACATAAAAGTCCTCATCACTCTTTGCTTCTGACTCAGCCCAGCTCTGCCTGAAGAAAGGGAAGCCCCCCCAAAAGTAGGGGGAATGTTGGGC	1	+	chr11:76485237-76485356
BHLHA9	BA_593036_010379	CTCAGCCCAGCTCTGCCTGAAGAAAGGGAAGCCCCCCCAAAAGTAGGGGGAATGTTGGGCTTAATCCAAACACCAACCCAGAATCCAGACGAGCCTCACGGTGGTAGCTGAAAGGTTTCT	1	+	chr11:76485297-76485416
BHLHA9	BA_593036_010380	TTAATCCAAACACCAACCCAGAATCCAGACGAGCCTCACGGTGGTAGCTGAAAGGTTTCTTGTAGCACAGCAGGGTTGGCTGCCTCTGATCTGCTCCTCCTTTCTGGATTCTTCTGCAAC	1	+	chr11:76485357-76485476
BHLHA9	BA_593036_010381	TGTAGCACAGCAGGGTTGGCTGCCTCTGATCTGCTCCTCCTTTCTGGATTCTTCTGCAACGGCCAGGCTGTACCTTAGTGTCAACTCTGGCTGCTCACAGATGGCGTTCAGGATGGAGCT	1	+	chr11:76485417-76485536
BHLHA9	BA_593036_010382	GCTCTTAGTCGGTGAGACATCTCTCCGGCCCTCAAGGTTTTTAAAATTCACTCAATCCACCCTTGCTATCCTTCTGCAACCCTATCTGCTCCCTTGCCAAGAATCTAATGTGGCATTCTA	1	+	chr11:76485548-76485667
BHLHA9	BA_593036_010383	CCTTGCTATCCTTCTGCAACCCTATCTGCTCCCTTGCCAAGAATCTAATGTGGCATTCTACCTGGGGTCAGGAGTAGGGGAAACCGAACCCGGTTGCCGGAGAGGGTCCGTGCAGCACAG	1	+	chr11:76485608-76485727
BHLHA9	BA_593036_010384	CCTGGGGTCAGGAGTAGGGGAAACCGAACCCGGTTGCCGGAGAGGGTCCGTGCAGCACAGCAAGTATGTTCCCTGTGACAACTGGAGCATTGCCCAGGGCGTGGCCAGGCTGCCCAGCTG	1	+	chr11:76485668-76485787
BHLHA9	BA_593036_010385	CAAGTATGTTCCCTGTGACAACTGGAGCATTGCCCAGGGCGTGGCCAGGCTGCCCAGCTGGTCCTGTGTACAAGAATCTGCACGCTTCCTTCCTTGCTTGCTTCCTTCCTCTCAGGTCCT	1	+	chr11:76485728-76485847
BHLHA9	BA_593036_010386	GTCCTGTGTACAAGAATCTGCACGCTTCCTTCCTTGCTTGCTTCCTTCCTCTCAGGTCCTCCCTCACCATCTCACCTGGGGGCAGGTAATAAAGCAGGAGGAGGGAGATGGATGGACTGG	1	+	chr11:76485788-76485907
BHLHA9	BA_593036_010387	CCCTCACCATCTCACCTGGGGGCAGGTAATAAAGCAGGAGGAGGGAGATGGATGGACTGGGAGGGCGGGGAGCCGCGTGGTGCCATAAAGCCCAGCTAGAGAGGACCTGTCCAGAGAGTG	1	+	chr11:76485848-76485967
BHLHA9	BA_593036_010388	GAGGGCGGGGAGCCGCGTGGTGCCATAAAGCCCAGCTAGAGAGGACCTGTCCAGAGAGTGTCCAGCCAGCAAGAGCCATCAGTCAGTGGACCAGCAGCCTTTTGGACCCAAATAGCTGAA	1	+	chr11:76485908-76486027
BHLHA9	BA_593036_010389	TCCAGCCAGCAAGAGCCATCAGTCAGTGGACCAGCAGCCTTTTGGACCCAAATAGCTGAAGCTGTGAGACCAGGACATAGGCCATGCTCCGAGGCACGCCAGGACTAGGCCTCGGGGGCC	1	+	chr11:76485968-76486087
BHLHA9	BA_593036_010390	GCTGTGAGACCAGGACATAGGCCATGCTCCGAGGCACGCCAGGACTAGGCCTCGGGGGCCTGAACCGGGCTGAGGATTTTGTGGAGGACTTGGGGCGCTCCTGCTCGGAGGCTGGCAGGA	2	+	chr11:76486028-76486147
BHLHA9	BA_593036_010391	TGAACCGGGCTGAGGATTTTGTGGAGGACTTGGGGCGCTCCTGCTCGGAGGCTGGCAGGAATTTTGGAGTGCTGAGGAGGAGCAGCTTGGACGAGGCAGAAGAGGCAGCTGGCAGAAAGC	1	+	chr11:76486088-76486207
BHLHA9	BA_593036_010392	ATTTTGGAGTGCTGAGGAGGAGCAGCTTGGACGAGGCAGAAGAGGCAGCTGGCAGAAAGCGCGAGCGGCCCACACGGTCCAAGGCTCGGCGCATGGCGGCTAACGTGCGGGAGCGCAAGC	2	+	chr11:76486148-76486267
BHLHA9	BA_593036_010393	GCGAGCGGCCCACACGGTCCAAGGCTCGGCGCATGGCGGCTAACGTGCGGGAGCGCAAGCGCATCCTGGATTACAACGAGGCGTTCAACGCGCTCCGCCGGGCGCTGCAGCATGACCTCG	2	+	chr11:76486208-76486327
BHLHA9	BA_593036_010394	GCATCCTGGATTACAACGAGGCGTTCAACGCGCTCCGCCGGGCGCTGCAGCATGACCTCGGAGGCAAGAGGCTCTCCAAGATCGCTACGCTGCGCAGGGCCATCCACCGCATCACTGCTC	1	+	chr11:76486268-76486387
BHLHA9	BA_593036_010395	GAGGCAAGAGGCTCTCCAAGATCGCTACGCTGCGCAGGGCCATCCACCGCATCACTGCTCTATCCTTGGTCCTGCGTGCCAGTCCGGCGCCCCGCTGGCCCTGCGGACACCTGGAGTGTC	2	+	chr11:76486328-76486447
BHLHA9	BA_593036_010396	TATCCTTGGTCCTGCGTGCCAGTCCGGCGCCCCGCTGGCCCTGCGGACACCTGGAGTGTCACGGCCAGGCTGCCCAAGGCTCGAGCACGGGGAATTCCAGCTTCAGTGTTCCGCGGTCAG	2	+	chr11:76486388-76486507
BHLHA9	BA_593036_010397	ACGGCCAGGCTGCCCAAGGCTCGAGCACGGGGAATTCCAGCTTCAGTGTTCCGCGGTCAGCGCCGTCTCCTATAGCGCCTAGCCTAACGCGCAGGGACATCGCCAGCCCCTTAGTGCCGC	2	+	chr11:76486448-76486567
BHLHA9	BA_593036_010398	CGCCGTCTCCTATAGCGCCTAGCCTAACGCGCAGGGACATCGCCAGCCCCTTAGTGCCGCCTACACCGCGCTGCGCTTCGTGTTCCCCGCACTCGCACTTGGGGCGGCCTAGGGTGATGG	2	+	chr11:76486508-76486627
BHLHA9	BA_593036_010399	CTACACCGCGCTGCGCTTCGTGTTCCCCGCACTCGCACTTGGGGCGGCCTAGGGTGATGGCCGAAGTGCCCAATTTGGCCCAAACCTCCGGGGGAAACTGGCGTCAATGTCCTGGGGCTC	2	+	chr11:76486568-76486687
BHLHA9	BA_593036_010400	CCGAAGTGCCCAATTTGGCCCAAACCTCCGGGGGAAACTGGCGTCAATGTCCTGGGGCTCCCCCTGTTCGACCGGTTTCGTGGCGGTGGGGTTCTGGGCTGGGCTACCAGCACTCTTGAT	1	+	chr11:76486628-76486747
BHLHA9	BA_593036_010401	CCCCTGTTCGACCGGTTTCGTGGCGGTGGGGTTCTGGGCTGGGCTACCAGCACTCTTGATCGTGCCACCCAGAGGGAAGCCGGCTTGGCCCGAGTGACTGCAAAAGAGAAGATGGCAGAA	1	+	chr11:76486688-76486807
BHLHA9	BA_593036_010402	CGTGCCACCCAGAGGGAAGCCGGCTTGGCCCGAGTGACTGCAAAAGAGAAGATGGCAGAAGTCATCCTGGACAGAGCAAAATTGAATGGGGTTGTGACTTGCGTGGCAAAGGAGGATGTC	1	+	chr11:76486748-76486867
BHLHA9	BA_593036_010403	GTCATCCTGGACAGAGCAAAATTGAATGGGGTTGTGACTTGCGTGGCAAAGGAGGATGTCTTACCATGGGAAGGAACTACCGGGCTCAGGGCAGCCTTCCCACATCCCAGCCTGGGGTGG	1	+	chr11:76486808-76486927
BHLHA9	BA_593036_010404	TTACCATGGGAAGGAACTACCGGGCTCAGGGCAGCCTTCCCACATCCCAGCCTGGGGTGGTGAAAAAGAAGGGAGATTTTAGGTTTGGACTTGGTCAACCCCTTGTTCCTGGAAAGTGGC	1	+	chr11:76486868-76486987
BHLHA9	BA_593036_010405	TGAAAAAGAAGGGAGATTTTAGGTTTGGACTTGGTCAACCCCTTGTTCCTGGAAAGTGGCCTTTGCTTTCCTTTGCTTCTGAGCCCTCCTTTTCCCTTGCCGCCTTTGGAAAGTGGGACT	1	+	chr11:76486928-76487047
BHLHA9	BA_593036_010406	CTTTGCTTTCCTTTGCTTCTGAGCCCTCCTTTTCCCTTGCCGCCTTTGGAAAGTGGGACTTGTGGGACTGTGTGGGTAGGCAGCTGCTATGATCTGAGGGCATATGCTGTGGTCCTCTTC	1	+	chr11:76486988-76487107
BHLHA9	BA_593036_010407	TGTGGGACTGTGTGGGTAGGCAGCTGCTATGATCTGAGGGCATATGCTGTGGTCCTCTTCCCCGGTTTGGGCTGCTGCTGAACTGAGAGAAGCCCAGAAAATGATCAAATAAAAAGGAAA	1	+	chr11:76487048-76487167
BMI1	BA_593036_002344	ATGGTCCCCGAGAGCGGCACTTGTGTCTCCAGCCTGCGCGGCTCCCGCGGCCGCTGCGCCCTTTGTTGAGAGGTAGACTTTGCTGAAACGGGGACGGGATCCCGAGATCGGGCGCTGCCT	2	+	chr2:18599387-18599506
BMI1	BA_593036_002345	CTTTGTTGAGAGGTAGACTTTGCTGAAACGGGGACGGGATCCCGAGATCGGGCGCTGCCTGGGTCCAGTGGCTTCCCTCCTCTCCCGAAGAAAGGGCTCTGGAGGTCTTTGAACCTCCAG	1	+	chr2:18599447-18599566
BMI1	BA_593036_002346	GGGTCCAGTGGCTTCCCTCCTCTCCCGAAGAAAGGGCTCTGGAGGTCTTTGAACCTCCAGGGAACGCCCCCATTTTATAGGGATGGGTACTGTGGGGAACAGCGATCCCGACGAGGTGGG	1	+	chr2:18599507-18599626
BMI1	BA_593036_002347	GGAACGCCCCCATTTTATAGGGATGGGTACTGTGGGGAACAGCGATCCCGACGAGGTGGGTGTTAGGCTGGGGGGAGCCCCGACAAAAATGTTATTAACTTAAGTTGGAGGGACACTTGT	1	+	chr2:18599567-18599686
BMI1	BA_593036_002348	TGTTAGGCTGGGGGGAGCCCCGACAAAAATGTTATTAACTTAAGTTGGAGGGACACTTGTGTGAAATTGGATGGCTGGTAAGATGGCGGTTCCCAGTTGTTTCCAAGGTCTTGTGCATTT	1	+	chr2:18599627-18599746
BMI1	BA_593036_002349	GTGAAATTGGATGGCTGGTAAGATGGCGGTTCCCAGTTGTTTCCAAGGTCTTGTGCATTTGTGTTGGAAAGGGTAAAGTTTTCAAGGTGGTATTTGTTGGGAGTCGAGGACAGGGGTTCC	1	+	chr2:18599687-18599806
BMI1	BA_593036_002350	GTGTTGGAAAGGGTAAAGTTTTCAAGGTGGTATTTGTTGGGAGTCGAGGACAGGGGTTCCATACGTACTTGGGGCGAGCTCTCAAGGAGGTGGGCATTTAAAATTTGAGCTTTGTTTTGG	1	+	chr2:18599747-18599866
BMI1	BA_593036_002351	ATACGTACTTGGGGCGAGCTCTCAAGGAGGTGGGCATTTAAAATTTGAGCTTTGTTTTGGAGTGAAGCCGGTGACTGTACGTTAGCCTTGCTGAGCGCCCTTTCTCTCTCCACTCTCACC	1	+	chr2:18599807-18599926
BMI1	BA_593036_002352	AGTGAAGCCGGTGACTGTACGTTAGCCTTGCTGAGCGCCCTTTCTCTCTCCACTCTCACCCCTCCTTTTTTCTTCTTTTCTCTCGAAGACACTACAACTTTCCCCTTTGCTGTGGGATGA	1	+	chr2:18599867-18599986
BMI1	BA_593036_002353	CCTCCTTTTTTCTTCTTTTCTCTCGAAGACACTACAACTTTCCCCTTTGCTGTGGGATGAGCTGAGACTTAGGTCCATTGCATTTTATAGATTTTGCTAAATGTCAGAATAGGTCATGAA	1	+	chr2:18599927-18600046
BMI1	BA_593036_002354	GCTGAGACTTAGGTCCATTGCATTTTATAGATTTTGCTAAATGTCAGAATAGGTCATGAAGTAAGGGGATGGATGCTTCGGAGAAGGAGCACTAACGCGTTGATTGCTTATGTTTACGTA	1	+	chr2:18599987-18600106
BMI1	BA_593036_002355	GTAAGGGGATGGATGCTTCGGAGAAGGAGCACTAACGCGTTGATTGCTTATGTTTACGTAGTCATTTGGACTTGACAGCGCTGGAGCATGATCGTTTCCCCAGAGCTTTACAGTTAATAA	1	+	chr2:18600047-18600166
BMI1	BA_593036_002356	GTCATTTGGACTTGACAGCGCTGGAGCATGATCGTTTCCCCAGAGCTTTACAGTTAATAATTGGAAATAAACAAGGAGAGAGACTTTGATCATTCCCAATTGCAATAAAAGGATTTAGTG	1	+	chr2:18600107-18600226
BMI1	BA_593036_002357	TTGGAAATAAACAAGGAGAGAGACTTTGATCATTCCCAATTGCAATAAAAGGATTTAGTGGGCTTAGTGGTCACGGTTCAATATCTGAAAGAGAATTGAGCATTAACCCCTTCGCTTTAA	1	+	chr2:18600167-18600286
BMI1	BA_593036_002358	GGCTTAGTGGTCACGGTTCAATATCTGAAAGAGAATTGAGCATTAACCCCTTCGCTTTAAAGTAGGCAAAATTCCGGGCATATTTACCCTAATGCAGATGTGTGGTGGCAGTTCAAGCTA	1	+	chr2:18600227-18600346
BMI1	BA_593036_002359	AGTAGGCAAAATTCCGGGCATATTTACCCTAATGCAGATGTGTGGTGGCAGTTCAAGCTATTTTTATAGGAACTCCCCCAACCTTTAGGGAGACGTTGTAAAACGTAGTAAAGACTTGAT	1	+	chr2:18600287-18600406
BMI1	BA_593036_002360	TTTTTATAGGAACTCCCCCAACCTTTAGGGAGACGTTGTAAAACGTAGTAAAGACTTGATACTAGAGATTGTAAATTGTTGACCACATGAGTAAAACCAAGTTCTGAGACTATGTACATT	1	+	chr2:18600347-18600466
BMI1	BA_593036_002361	ACTAGAGATTGTAAATTGTTGACCACATGAGTAAAACCAAGTTCTGAGACTATGTACATTTGGGTCCTAAGTACACTAGGGAGATAAAGGAGATTTAATCAAGAGGTTGATTTTTCTGTA	1	+	chr2:18600407-18600526
BMI1	BA_593036_002362	TGGGTCCTAAGTACACTAGGGAGATAAAGGAGATTTAATCAAGAGGTTGATTTTTCTGTAAAATTATTATTATATGATGTGTTTATAATCTACAGTAAATTGTATTTATTTCCATGTCTT	1	+	chr2:18600467-18600586
BMI1	BA_593036_002363	AAATTATTATTATATGATGTGTTTATAATCTACAGTAAATTGTATTTATTTCCATGTCTTCTATGAAAGGGAAATAATTTACAATAATCTATGAGGGCAAATTATACTCTTGTAATAATA	1	+	chr2:18600527-18600646
BMI1	BA_593036_002364	CTATGAAAGGGAAATAATTTACAATAATCTATGAGGGCAAATTATACTCTTGTAATAATATCTTTAAAACTATGTAAAAGATTGTTTATGCATGTGTAGACACTCAAATATAATCACATA	1	+	chr2:18600587-18600706
BMI1	BA_593036_002365	TCTTTAAAACTATGTAAAAGATTGTTTATGCATGTGTAGACACTCAAATATAATCACATACAAACTTTTGCAAGGCATGTAAGCATTTGGATATATTTGATGTCCAGTCTACCACTAAGC	1	+	chr2:18600647-18600766
BMI1	BA_593036_002366	CAAACTTTTGCAAGGCATGTAAGCATTTGGATATATTTGATGTCCAGTCTACCACTAAGCTCATGAGGGTATGTTAAGTGTTCAAGTAGGCAAAGTTCTCCCCATCAGTCAAGTCGCCCC	1	+	chr2:18600707-18600826
BMI1	BA_593036_002367	TCATGAGGGTATGTTAAGTGTTCAAGTAGGCAAAGTTCTCCCCATCAGTCAAGTCGCCCCCAAGTTTACCCACGCTTTCCTTTGAGCAGTGAGCCCCAAGTGGGATTATAGAGATCATTT	1	+	chr2:18600767-18600886
BMI1	BA_593036_002368	CAAGTTTACCCACGCTTTCCTTTGAGCAGTGAGCCCCAAGTGGGATTATAGAGATCATTTGCATTTCTTAGGTTGCAGTGATCAAGCTGATTGTTTATCATCAGAGCTTGCTTCTGTTTT	1	+	chr2:18600827-18600946
BMI1	BA_593036_002369	GCATTTCTTAGGTTGCAGTGATCAAGCTGATTGTTTATCATCAGAGCTTGCTTCTGTTTTCCTTCATATTGACATTACTGTCCTTAGGCCTCCAACTAAAAACTGACAGCTCCAACTGAC	1	+	chr2:18600887-18601006
BMI1	BA_593036_002370	CCTTCATATTGACATTACTGTCCTTAGGCCTCCAACTAAAAACTGACAGCTCCAACTGACTAAGCTGTAGCTTGACTATTGAGTATTTTCAGTGTTTTATGCTTGTTGCATTTTTATGAT	1	+	chr2:18600947-18601066
BMI1	BA_593036_002371	TAAGCTGTAGCTTGACTATTGAGTATTTTCAGTGTTTTATGCTTGTTGCATTTTTATGATTTATAGGGAGTTTCTATGGTGCAAGAGGTTGTTTCTTAAGTCTGACCAAGCATTCTAGAA	1	+	chr2:18601007-18601126
BMI1	BA_593036_002372	TTATAGGGAGTTTCTATGGTGCAAGAGGTTGTTTCTTAAGTCTGACCAAGCATTCTAGAAAGTCTCCATGAGGTTGTCAGTACTGTCCAATAGGATAAAAGAATGAAGAATTGATATTTG	1	+	chr2:18601067-18601186
BMI1	BA_593036_002373	AGTCTCCATGAGGTTGTCAGTACTGTCCAATAGGATAAAAGAATGAAGAATTGATATTTGTATCAATAACAAAGTAAGAATTGATTAGCATTATGAATGGTTGTAGGAATAGGGCCAGAT	1	+	chr2:18601127-18601246
BMI1	BA_593036_002374	TATCAATAACAAAGTAAGAATTGATTAGCATTATGAATGGTTGTAGGAATAGGGCCAGATTATTTTTATTTGAGGGAGGACAGTTGTGTGAATTCCAATTTAAAGTGAATTTGAGAGACT	1	+	chr2:18601187-18601306
BMI1	BA_593036_002375	TATTTTTATTTGAGGGAGGACAGTTGTGTGAATTCCAATTTAAAGTGAATTTGAGAGACTTTGATCAAGTTCATGTGACTGAAATGTTCAAAGAGAACTAACTAGTGGTCACCTTCTATT	1	+	chr2:18601247-18601366
BMI1	BA_593036_002376	TTGATCAAGTTCATGTGACTGAAATGTTCAAAGAGAACTAACTAGTGGTCACCTTCTATTGAGGTTTGACTGCTCTTTTGGGTTAGTGTTTGCAATTTTATAATAGAATGTAACATGGAG	1	+	chr2:18601307-18601426
BMI1	BA_593036_002377	GAGGTTTGACTGCTCTTTTGGGTTAGTGTTTGCAATTTTATAATAGAATGTAACATGGAGAGGAGGAGGCAAGATAGAGAGAGCCCTTTGGTGGGAACTTGATGATGTGTGAGTATTGGA	1	+	chr2:18601367-18601486
BMI1	BA_593036_002378	AGGAGGAGGCAAGATAGAGAGAGCCCTTTGGTGGGAACTTGATGATGTGTGAGTATTGGATATGGTTTCTTTCATATGCAGAGCATCAGCCTCACTCTTTTTAGGAAAGAGCCTGTGGTT	1	+	chr2:18601427-18601546
BMI1	BA_593036_002379	TATGGTTTCTTTCATATGCAGAGCATCAGCCTCACTCTTTTTAGGAAAGAGCCTGTGGTTTCACAAGAGAGTTGCCTTTAATCACTAAGTATGGTTGAATTTACAGCTTGCTCCTTTTGA	1	+	chr2:18601487-18601606
BMI1	BA_593036_002380	TCACAAGAGAGTTGCCTTTAATCACTAAGTATGGTTGAATTTACAGCTTGCTCCTTTTGAGAGTCATAATTTCATTTACTCCTTCTCAGCCTGCTTTCCTTGGATTGATGCTACTTGTTG	1	+	chr2:18601547-18601666
BMI1	BA_593036_002381	GAGTCATAATTTCATTTACTCCTTCTCAGCCTGCTTTCCTTGGATTGATGCTACTTGTTGACAGAATTCCGAACAAGTAATCCGGAGCAGCTCTGATTGAAGTCACTAGTTTCCCCTTCA	1	+	chr2:18601607-18601726
BMP2	BA_593036_003125	CGCCGTCCACACCCCTGCGCGCCGCTCCCGCCCGCCCGGGGATCCCCGGCGCGCTGCGCCTCCGAGGGGGAGGTGTTCGGCCACGGCCGGGAGGGAGCCGGCAGGCGGCGTCTCCTTTAA	2	+	chr2:133377818-133377937
BMP2	BA_593036_003126	TCCGAGGGGGAGGTGTTCGGCCACGGCCGGGAGGGAGCCGGCAGGCGGCGTCTCCTTTAAAAGCCGCGAGCGCCGCGCCACGGCGCCTCCGTCGTCGCCGCCGGAGTCCTCGCCCTGCCG	2	+	chr2:133377878-133377997
BMP2	BA_593036_003127	AAGCCGCGAGCGCCGCGCCACGGCGCCTCCGTCGTCGCCGCCGGAGTCCTCGCCCTGCCGCGCAGAGCCCTGCTCGCACTGCGCCCGCCGCCGCTGCGCTTCCCACAGCCCGCCCGGGAT	2	+	chr2:133377938-133378057
BMP2	BA_593036_003128	CGCAGAGCCCTGCTCGCACTGCGCCCGCCGCCGCTGCGCTTCCCACAGCCCGCCCGGGATTGGCAGCCCCGGACGTAGCCTCCCCAGGCGACACCAGGCACCGGACGCCCTCCCGGCGAA	2	+	chr2:133377998-133378117
BMP2	BA_593036_003129	TGGCAGCCCCGGACGTAGCCTCCCCAGGCGACACCAGGCACCGGACGCCCTCCCGGCGAAAGACGCGAGGGTCACCCGCGGCTTCGAGGGACTGGCACGACACGGGTTGGAACTCCAGAC	2	+	chr2:133378058-133378177
BMP2	BA_593036_003130	AGACGCGAGGGTCACCCGCGGCTTCGAGGGACTGGCACGACACGGGTTGGAACTCCAGACTGTGCGCGCCTGGCGCTGTGGCCTCGGCTGTCCGGGAGAAGCTAGAGTCGCGGACCGACG	2	+	chr2:133378118-133378237
BMP2	BA_593036_003131	TGTGCGCGCCTGGCGCTGTGGCCTCGGCTGTCCGGGAGAAGCTAGAGTCGCGGACCGACGCTAAGAACCGGGAGTCCGGAGCACAGTCTTACCCTCAATGCGGGGCCACTCTGACCCAGG	2	+	chr2:133378178-133378297
BMP2	BA_593036_003132	CTAAGAACCGGGAGTCCGGAGCACAGTCTTACCCTCAATGCGGGGCCACTCTGACCCAGGAGTGAGCGCCCAAGGCGAGCGGGCGGAAGAGTGAGTGGACCCCAGGCTGCCACAAAAGAC	1	+	chr2:133378238-133378357
BMP2	BA_593036_003133	AGTGAGCGCCCAAGGCGAGCGGGCGGAAGAGTGAGTGGACCCCAGGCTGCCACAAAAGACACTTGGCCCGAGGGCTCGGAGCGCGAGGTCACCCGGTTTGGCAACCCGAGACGCGCGGCT	2	+	chr2:133378298-133378417
BMP2	BA_593036_003134	ACTTGGCCCGAGGGCTCGGAGCGCGAGGTCACCCGGTTTGGCAACCCGAGACGCGCGGCTGGACTGTCTCGAGAATGAGCCCCAGGACGCCGGGGCGCCGCAGCCGTGCGGGCTCTGCTG	2	+	chr2:133378358-133378477
BMP2	BA_593036_003135	GGACTGTCTCGAGAATGAGCCCCAGGACGCCGGGGCGCCGCAGCCGTGCGGGCTCTGCTGGCGAGCGCTGATGGGGGTGCGCCAGAGTCAGGCTGAGGGATGCAGAGTGGCGGCCCGCCC	2	+	chr2:133378418-133378537
BMP2	BA_593036_003136	GCGAGCGCTGATGGGGGTGCGCCAGAGTCAGGCTGAGGGATGCAGAGTGGCGGCCCGCCCGCCACCCAGATCTTCGCTGCGCCCTTGCCCGGACACGGCATCGCCCACGATGGCTGCCCC	2	+	chr2:133378478-133378597
BMP2	BA_593036_003137	GCCACCCAGATCTTCGCTGCGCCCTTGCCCGGACACGGCATCGCCCACGATGGCTGCCCCGAGCCATGGGTCGCGGCCCAGCTAACGCAGAACGTCCGTCCCTCGCCCGGCGAGTCCCGG	2	+	chr2:133378538-133378657
BMP2	BA_593036_003138	GAGCCATGGGTCGCGGCCCAGCTAACGCAGAACGTCCGTCCCTCGCCCGGCGAGTCCCGGAGCCAGCCCCGCGCCCCGCCAGCGCTGGTCCCTGAGGCCGACGACAGCAGCAGCCTTGCC	2	+	chr2:133378598-133378717
BMP2	BA_593036_003139	AGCCAGCCCCGCGCCCCGCCAGCGCTGGTCCCTGAGGCCGACGACAGCAGCAGCCTTGCCTCAGCCTTCCCTTCCCGTCCCGGCCCCGCACTCCTCCCCCTGCTCGAGGCTGTGTGTCAG	2	+	chr2:133378658-133378777
BMP2	BA_593036_003140	TCAGCCTTCCCTTCCCGTCCCGGCCCCGCACTCCTCCCCCTGCTCGAGGCTGTGTGTCAGCACTTGGCTGGAGACTTCTTGAACTTGCCGGGAGAGTGACTTGGGCTCCCCACTTCGCGC	2	+	chr2:133378718-133378837
BMP2	BA_593036_003141	CACTTGGCTGGAGACTTCTTGAACTTGCCGGGAGAGTGACTTGGGCTCCCCACTTCGCGCCGGTGTCCTCGCCCGGCGGATCCAGTCTTGCCGCCTCCAGCCCGATCACCTCTCTTCCTC	1	+	chr2:133378778-133378897
BMP2	BA_593036_003142	CGGTGTCCTCGCCCGGCGGATCCAGTCTTGCCGCCTCCAGCCCGATCACCTCTCTTCCTCAGCCCGCTGGGCCCACCCCAAGACACAGTTCCCTACAGGGAGAACACCCGGAGAAGGAGG	2	+	chr2:133378838-133378957
BMP2	BA_593036_003143	AGCCCGCTGGGCCCACCCCAAGACACAGTTCCCTACAGGGAGAACACCCGGAGAAGGAGGAGGAGGCGAAGAAAAGCAACAGAAGCCCAGTTGCTGCTCCAGGTCCCTCGGACAGAGCTT	1	+	chr2:133378898-133379017
BMP2	BA_593036_003144	AGGAGGCGAAGAAAAGCAACAGAAGCCCAGTTGCTGCTCCAGGTCCCTCGGACAGAGCTTTTTCCATGTGGAGACTCTCTCAATGGACGTGCCCCCTAGTGCTTCTTAGACGGACTGCGG	1	+	chr2:133378958-133379077
BMP2	BA_593036_003145	TTTCCATGTGGAGACTCTCTCAATGGACGTGCCCCCTAGTGCTTCTTAGACGGACTGCGGTCTCCTAAAGGTAGAGGACACGGGCCGGGGACCCGGGGTTGGCTGGCGGGTGACACCGCT	1	+	chr2:133379018-133379137
BMP2	BA_593036_003146	TCTCCTAAAGGTAGAGGACACGGGCCGGGGACCCGGGGTTGGCTGGCGGGTGACACCGCTTCCCGCCCAACGGCGCAGGGCGCCTGGGAGGACTGGTGGAGTGGAGTGGACGTAAACATA	2	+	chr2:133379078-133379197
BMP2	BA_593036_003147	TCCCGCCCAACGGCGCAGGGCGCCTGGGAGGACTGGTGGAGTGGAGTGGACGTAAACATACCCTCACCCGGTGCACGTGCAGCGGATCCCTAGAGGGGTTAGGCATTCCAAACCCCAGAT	1	+	chr2:133379138-133379257
BMP2	BA_593036_003148	CCCTCACCCGGTGCACGTGCAGCGGATCCCTAGAGGGGTTAGGCATTCCAAACCCCAGATCCCTCTGCCTTGCCCACTGGCCTGCGACCTTCCTCCAGCCGGTTCCTCCTCCCCAAGTTT	1	+	chr2:133379198-133379317
BMP2	BA_593036_003149	CCCTCTGCCTTGCCCACTGGCCTGCGACCTTCCTCCAGCCGGTTCCTCCTCCCCAAGTTTTCGATACATTATAAGGGCTGTTTTGGGCTTTCAAAAAAAAAAATGCAGAAATCCATTTAA	1	+	chr2:133379258-133379377
BMP2	BA_593036_003150	TCGATACATTATAAGGGCTGTTTTGGGCTTTCAAAAAAAAAAATGCAGAAATCCATTTAAAGAGTATGGCCAGTAGATTTTACTAGTTCATTGCTGACCAGTAAGTACTCCAAGCCTTAG	1	+	chr2:133379318-133379437
BMP2	BA_593036_003151	AGAGTATGGCCAGTAGATTTTACTAGTTCATTGCTGACCAGTAAGTACTCCAAGCCTTAGAGATCCTTGGCTATCCTTAAGAAGTAGGTCCCATTTAGGAAGATACTAAAAGTTGGGGTT	1	+	chr2:133379378-133379497
BMP2	BA_593036_003152	AGATCCTTGGCTATCCTTAAGAAGTAGGTCCCATTTAGGAAGATACTAAAAGTTGGGGTTCTCCATGTGTGTTTACTGACTATGCGAATGTGTCATAGCTTACACGTGCATTCATAAACA	1	+	chr2:133379438-133379557
BMP2	BA_593036_003153	CTCCATGTGTGTTTACTGACTATGCGAATGTGTCATAGCTTACACGTGCATTCATAAACACTATCTATTTAGTTAATTGCAGGAAGGTGCATGGATTTCTTGACTGCACAGGAGTCTGGG	1	+	chr2:133379498-133379617
BMP2	BA_593036_003154	CTATCTATTTAGTTAATTGCAGGAAGGTGCATGGATTTCTTGACTGCACAGGAGTCTGGGGAAGGGGGACAGGGTTGCCTGTGGGTCAACCTTAAATAGTTAGGGGCGTAGGCCACAACT	1	+	chr2:133379558-133379677
BMP2	BA_593036_003155	GAAGGGGGACAGGGTTGCCTGTGGGTCAACCTTAAATAGTTAGGGGCGTAGGCCACAACTTGCAAGTGGCGTCATTAGCAGTAATCTTGAGTTTAGCGCTTACTGAATCTACAAGTTTGA	1	+	chr2:133379618-133379737
BMP2	BA_593036_003156	TGCAAGTGGCGTCATTAGCAGTAATCTTGAGTTTAGCGCTTACTGAATCTACAAGTTTGATATGCTCAACTACCAGGAAATTGTATACAGCGCCTCTAAGGAAGTCACTTGTGCATTTGT	1	+	chr2:133379678-133379797
BMP2	BA_593036_003157	TATGCTCAACTACCAGGAAATTGTATACAGCGCCTCTAAGGAAGTCACTTGTGCATTTGTGTCTGTTAATATGCACATGAGCGCTGCACTGTATAAGTTTGTCAGGGATGCAGTGTCCGA	1	+	chr2:133379738-133379857
BMP2	BA_593036_003158	GTCTGTTAATATGCACATGAGCGCTGCACTGTATAAGTTTGTCAGGGATGCAGTGTCCGACCAACCTATGGCTTCCCAGCTTCCTGACACCCGCATTCCCAGCTAGTGTCACAAGAAAAG	1	+	chr2:133379798-133379917
BMP2	BA_593036_003159	CCAACCTATGGCTTCCCAGCTTCCTGACACCCGCATTCCCAGCTAGTGTCACAAGAAAAGGGTACAGACGGTCAATGCTCTTTTTAATTGGGAGTTAAGACCAAGCCCCAAGTAAGAAGT	1	+	chr2:133379858-133379977
BMP2	BA_593036_003160	GGTACAGACGGTCAATGCTCTTTTTAATTGGGAGTTAAGACCAAGCCCCAAGTAAGAAGTCCGGCTGGGACTTGGGGGTCCTCCATCCTCTTGATCATCCAGGCTGTAGCCCGCGAATAT	1	+	chr2:133379918-133380037
BMP2	BA_593036_003161	CCGGCTGGGACTTGGGGGTCCTCCATCCTCTTGATCATCCAGGCTGTAGCCCGCGAATATGACATGCCAGGAGGGCATCCTGGAGAAGGCCAGCGAGCTCTATGGGAGCCGAGGCCGCGG	1	+	chr2:133379978-133380097
BMP2	BA_593036_003162	GACATGCCAGGAGGGCATCCTGGAGAAGGCCAGCGAGCTCTATGGGAGCCGAGGCCGCGGGGGCGGGCGGAGGACTGGGCGGGGAACGTGGGTGACTCACGTCGGCCCTGTCCGCAGGTC	2	+	chr2:133380038-133380157
BMP2	BA_593036_003163	GGGCGGGCGGAGGACTGGGCGGGGAACGTGGGTGACTCACGTCGGCCCTGTCCGCAGGTCGACCATGGTGGCCGGGACCCGCTGTCTTCTAGTGTTGCTGCTTCCCCAGGTCCTCCTGGG	2	+	chr2:133380098-133380217
BMP2	BA_593036_003164	GACCATGGTGGCCGGGACCCGCTGTCTTCTAGTGTTGCTGCTTCCCCAGGTCCTCCTGGGCGGCGCGGCCGGCCTCATTCCAGAGCTGGGCCGCAAGAAGTTCGCCGCGGCATCCAGCCG	2	+	chr2:133380158-133380277
BMP2	BA_593036_003165	CGGCGCGGCCGGCCTCATTCCAGAGCTGGGCCGCAAGAAGTTCGCCGCGGCATCCAGCCGACCCTTGTCCCGGCCTTCGGAAGACGTCCTCAGCGAATTTGAGTTGAGGCTGCTCAGCAT	2	+	chr2:133380218-133380337
BMP2	BA_593036_003166	ACCCTTGTCCCGGCCTTCGGAAGACGTCCTCAGCGAATTTGAGTTGAGGCTGCTCAGCATGTTTGGCCTGAAGCAGAGACCCACCCCCAGCAAGGACGTCGTGGTGCCCCCCTATATGCT	1	+	chr2:133380278-133380397
BMP2	BA_593036_003167	GTTTGGCCTGAAGCAGAGACCCACCCCCAGCAAGGACGTCGTGGTGCCCCCCTATATGCTAGATCTGTACCGCAGGCACTCAGGCCAGCCAGGAGCGCCCGCCCCAGACCACCGGCTGGA	2	+	chr2:133380338-133380457
BMP2	BA_593036_003168	AGATCTGTACCGCAGGCACTCAGGCCAGCCAGGAGCGCCCGCCCCAGACCACCGGCTGGAGAGGGCAGCCAGCCGCGCCAACACCGTGCGCAGCTTCCATCACGAAGGTGAGCGGGCGGC	2	+	chr2:133380398-133380517
BMP2	BA_593036_003169	GGAGACTAGGCGGGCAGCCCGGGCCTCCACTAGCACAGTAGAAGGCCTTTCGGCTTCTGTACGGTCCCCTCTGTGGCCCCAGCCAGGGATTCCCCGCTGGTGAGTCCTCACCCTTTCCTG	2	+	chr2:133380547-133380666
BMP2	BA_593036_003170	ACGGTCCCCTCTGTGGCCCCAGCCAGGGATTCCCCGCTGGTGAGTCCTCACCCTTTCCTGGCAAGTAGCCAAAAGACAGGCTCCTCCCCCTAGAACTGGAGGGAAATCGAGTGATGGGGA	1	+	chr2:133380607-133380726
BMP2	BA_593036_003171	GCAAGTAGCCAAAAGACAGGCTCCTCCCCCTAGAACTGGAGGGAAATCGAGTGATGGGGAAGAGGGTGAGAGACTGACTAGCCCCTAGTCAGCACAGCATGCGAGATTTCCACAGAAGGT	1	+	chr2:133380667-133380786
BMP2	BA_593036_003172	AGAGGGTGAGAGACTGACTAGCCCCTAGTCAGCACAGCATGCGAGATTTCCACAGAAGGTAGAGAGTTGGAGCTCCTTAAATCTGCTTGGAAGCTCAGATCTGTGACTTGTGTTCACGCT	1	+	chr2:133380727-133380846
BMP2	BA_593036_003173	AGAGAGTTGGAGCTCCTTAAATCTGCTTGGAAGCTCAGATCTGTGACTTGTGTTCACGCTGTAGTTTTAAGCTAGGCAGAGCCAAGGGCAGAATGTTCGGAGATAGTATTAGCAAATCAA	1	+	chr2:133380787-133380906
BMP2	BA_593036_003174	GTAGTTTTAAGCTAGGCAGAGCCAAGGGCAGAATGTTCGGAGATAGTATTAGCAAATCAAATCCAGGGCCTCAAAGCATTCAAATTTACTGTTCATCTGGGCCTAGTTTGAAAGATTTCT	1	+	chr2:133380847-133380966
BMP2	BA_593036_003175	ATCCAGGGCCTCAAAGCATTCAAATTTACTGTTCATCTGGGCCTAGTTTGAAAGATTTCTGAATCCCTATCTAATCCCCGTGGGAGATCAATTCCACAATTCGTCATATTGTTTCCACAA	1	+	chr2:133380907-133381026
BMP4	BA_593036_011401	GGCACTTTCGGGAAACCTTTGAGAAAGAAGTGTAAAGGATGGAGAGTCACGTCCTTCCTGGCGGCGGTGGCTGCCCAGCGCCATCCCACACTGCTGCCCTGGGTGCAGAGACCGCGGGCG	1	+	chr14:47008449-47008568
BMP4	BA_593036_011402	GCGGCGGTGGCTGCCCAGCGCCATCCCACACTGCTGCCCTGGGTGCAGAGACCGCGGGCGCCCCTGAGCGACAGTCCGCTCTCACCACCATCAGCGCAGCTTTCTGAGACGATTTCTCTA	2	+	chr14:47008509-47008628
BMP4	BA_593036_011403	CCCCTGAGCGACAGTCCGCTCTCACCACCATCAGCGCAGCTTTCTGAGACGATTTCTCTATTCCCCGACCAGCGTCGCCGCTGGGAATAACTGGGAAAGCGCTGGAAAGGGCAAAGGGCT	1	+	chr14:47008569-47008688
BMP4	BA_593036_011404	TTCCCCGACCAGCGTCGCCGCTGGGAATAACTGGGAAAGCGCTGGAAAGGGCAAAGGGCTTATTGTTGATTTGTTTATTTGCTTTTAAGGGGGAAAGAGATGGCGATATGCTAGCGACTG	1	+	chr14:47008629-47008748
BMP4	BA_593036_011405	TATTGTTGATTTGTTTATTTGCTTTTAAGGGGGAAAGAGATGGCGATATGCTAGCGACTGGCGCACGCGGAGCGAGGGCACCGTGGAACCGCCGACGCTCAGGATCCCCGGACAATCCTG	1	+	chr14:47008689-47008808
BMP4	BA_593036_011406	GCGCACGCGGAGCGAGGGCACCGTGGAACCGCCGACGCTCAGGATCCCCGGACAATCCTGTGCCTTTGGCGGTGTGTGGAGCGCTCTCGACGTTAAAGCCCAGTAAATAGACGAAGGACT	1	+	chr14:47008749-47008868
BMP4	BA_593036_011407	TGCCTTTGGCGGTGTGTGGAGCGCTCTCGACGTTAAAGCCCAGTAAATAGACGAAGGACTTGTTTCAATTTCAACTTCACAAGGATCCCTTTCTAATCACTCCTTTCTTCCCTGATTTTT	1	+	chr14:47008809-47008928
BMP4	BA_593036_011408	TTAAAAAATACAGATCAAAGTAAATTTTCATCTCCTGGTATTTTTTTTTTTCTTAATGGGGTTGATACAGCTCCTGGAGGCAGTTACCCTTCACTTTCTCCCCAGAATCTTCTTCTAAAA	1	+	chr14:47008934-47009053
BMP4	BA_593036_011409	GTTGATACAGCTCCTGGAGGCAGTTACCCTTCACTTTCTCCCCAGAATCTTCTTCTAAAACCAAAATTTAATAGTAGCCTCGGTTTGCCAAATATGACCCTGCTAGTGATTCAACATCTC	1	+	chr14:47008994-47009113
BMP4	BA_593036_011410	CCAAAATTTAATAGTAGCCTCGGTTTGCCAAATATGACCCTGCTAGTGATTCAACATCTCACAAAACCTTCAGTTCATAAACCAGGATACTAAAAAAACTATCAACCAAAGCCGTGGCGG	1	+	chr14:47009054-47009173
BMP4	BA_593036_011411	ACAAAACCTTCAGTTCATAAACCAGGATACTAAAAAAACTATCAACCAAAGCCGTGGCGGGAAACCTTCTGAGTCCCCGGGGCCCAACTCCACTGCGTGTAAGGACCCCGCAATTCCCGA	1	+	chr14:47009114-47009233
BMP4	BA_593036_011412	GAAACCTTCTGAGTCCCCGGGGCCCAACTCCACTGCGTGTAAGGACCCCGCAATTCCCGAACCCTTTGGAGTATCGCAAGCTCCTCATTAGCCCTGCTGGCATGTCCGCACAGACACAGC	1	+	chr14:47009174-47009293
BMP4	BA_593036_011413	ACCCTTTGGAGTATCGCAAGCTCCTCATTAGCCCTGCTGGCATGTCCGCACAGACACAGCATGGCAGAAGACCCGCACAGGTAGCCTTTCGGCATCCTGGCCACGGTCCGTCGAACCTTA	1	+	chr14:47009234-47009353
BMP4	BA_593036_011414	ATGGCAGAAGACCCGCACAGGTAGCCTTTCGGCATCCTGGCCACGGTCCGTCGAACCTTACACCCCTTCCCAGGGAGGGGAGAGTACCAGAAGGCAGAATGCATGGGTGCCCATGTCTAA	1	+	chr14:47009294-47009413
BMP4	BA_593036_011415	CACCCCTTCCCAGGGAGGGGAGAGTACCAGAAGGCAGAATGCATGGGTGCCCATGTCTAAGAAAATAGCTCCTGGAGATGGGAGCGAGTTCTGTACCTACAGTTCGCTAGCTCTCAGGGG	1	+	chr14:47009354-47009473
BMP4	BA_593036_011416	GAAAATAGCTCCTGGAGATGGGAGCGAGTTCTGTACCTACAGTTCGCTAGCTCTCAGGGGCTGGGAGGGGGTGCGTTGGGGACAAGATTAGGTGACACCCCGCTCAAGGAAGCCTCTCTA	1	+	chr14:47009414-47009533
BMP4	BA_593036_011417	CTGGGAGGGGGTGCGTTGGGGACAAGATTAGGTGACACCCCGCTCAAGGAAGCCTCTCTATCCCGGGTCGCGCTTTAGAGCAAAGCAGGACTACAGCCTCTTTTGCAAAGCTAGCTCTGG	1	+	chr14:47009474-47009593
BMP4	BA_593036_011418	TCCCGGGTCGCGCTTTAGAGCAAAGCAGGACTACAGCCTCTTTTGCAAAGCTAGCTCTGGCTAGGTTCTCTCTCCTAATGAAGCAGTCCTCAGTCCCCCACTGGTGTTGAAACTTAGAGT	1	+	chr14:47009534-47009653
BMP4	BA_593036_011419	CTAGGTTCTCTCTCCTAATGAAGCAGTCCTCAGTCCCCCACTGGTGTTGAAACTTAGAGTTGACTCCCTCCTCTCCCACTCTTATAGTCTAAGTGGAAGCAAACCCACCAAACCCCACAG	1	+	chr14:47009594-47009713
BMP4	BA_593036_011420	TGACTCCCTCCTCTCCCACTCTTATAGTCTAAGTGGAAGCAAACCCACCAAACCCCACAGTTCTTCCCAATGACCTCTCTTCCAAGGCCTTCTCTCCTTCCCGCCTCTCCTGGCCCGCAC	1	+	chr14:47009654-47009773
BMP4	BA_593036_011421	TTCTTCCCAATGACCTCTCTTCCAAGGCCTTCTCTCCTTCCCGCCTCTCCTGGCCCGCACCTCCCTAAAGTAGGTTGGATAGACGCAGTAACATATATGGAGGTGCCTTTTAGCCTCCAT	1	+	chr14:47009714-47009833
BMP4	BA_593036_011422	CTCCCTAAAGTAGGTTGGATAGACGCAGTAACATATATGGAGGTGCCTTTTAGCCTCCATCATCCCACCTCCAACACTGTTGGAGAAGGAAGGAGGAATAGGCCAACTTTTGCCTCGGTT	1	+	chr14:47009774-47009893
BMP4	BA_593036_011423	CATCCCACCTCCAACACTGTTGGAGAAGGAAGGAGGAATAGGCCAACTTTTGCCTCGGTTACAGCCTGAGCCCCATCCCCAGCTTCTACTACGGGTGCACCTCGAATCCTCAGAATAGCG	1	+	chr14:47009834-47009953
BMP4	BA_593036_011424	ACAGCCTGAGCCCCATCCCCAGCTTCTACTACGGGTGCACCTCGAATCCTCAGAATAGCGCCCCTCTCCAGGTTGCCCTGCTCACCATTGGTTCCTGCAGAAGCGGGCTCGCCAGCAGCT	1	+	chr14:47009894-47010013
BMP4	BA_593036_011425	CCCCTCTCCAGGTTGCCCTGCTCACCATTGGTTCCTGCAGAAGCGGGCTCGCCAGCAGCTGCTTCTGGGGACCTCTAGAAAGCTGCAATGAACCTGGTCGAGGGCCAGAGACTGGATCGC	1	+	chr14:47009954-47010073
BMP4	BA_593036_011426	GCTTCTGGGGACCTCTAGAAAGCTGCAATGAACCTGGTCGAGGGCCAGAGACTGGATCGCTGCAGGCTCCAAGACGGTTTAGACGAGAATCCCATCAGGGACGGAGACCAGATACTCAGG	1	+	chr14:47010014-47010133
BMP4	BA_593036_011427	TGCAGGCTCCAAGACGGTTTAGACGAGAATCCCATCAGGGACGGAGACCAGATACTCAGGCTGGGTTGCAGCGCAGCGGCGTCTTAGGCTGGGGTCTCTCAGCTCGGATGCCGAACTCAC	1	+	chr14:47010074-47010193
BMP4	BA_593036_011428	CTGGGTTGCAGCGCAGCGGCGTCTTAGGCTGGGGTCTCTCAGCTCGGATGCCGAACTCACCTAGCTTCCGGGCCAGGCCTCGCGCTCTTGCCTTCCCACCCTCCAGCACCACCCTCTCAC	2	+	chr14:47010134-47010253
BMP4	BA_593036_011429	CTCCCCTTCTGGGGATGGGAGCCCCGCCCACATCCTCCCATCCAGCCACGGGGCCTCGCCTCGCCTGGCAAGGCCCGGGTCCGGAAGATTGCACAGCTCCCCAGCCCTCAGTTGCCACCT	2	+	chr14:47010354-47010473
BMP4	BA_593036_011430	TCGCCTGGCAAGGCCCGGGTCCGGAAGATTGCACAGCTCCCCAGCCCTCAGTTGCCACCTTGGCTGGGACCGATGCCTCCAGCTCGGGAAGCAGCCGGGGCTCACCTGGGGACCACGTGC	2	+	chr14:47010414-47010533
BMP4	BA_593036_011431	TGGCTGGGACCGATGCCTCCAGCTCGGGAAGCAGCCGGGGCTCACCTGGGGACCACGTGCAAGAGGTACTAGAAAGCATGCACCAACTAGTCTCTGTACCTTCCAAAAATACCCATGGGA	1	+	chr14:47010474-47010593
BMP4	BA_593036_011432	AAGAGGTACTAGAAAGCATGCACCAACTAGTCTCTGTACCTTCCAAAAATACCCATGGGAGTCTGGGCTTCCCTGAGTTTAGAATAACTGCTGCCCAAACTGATGATTAAAACACTGAGT	1	+	chr14:47010534-47010653
BMP4	BA_593036_011433	GTCTGGGCTTCCCTGAGTTTAGAATAACTGCTGCCCAAACTGATGATTAAAACACTGAGTAATCACCATTTACCCCGAGTAATTAGAGATAATGAAACACCTCTAAAATCAGGTTATGGA	1	+	chr14:47010594-47010713
BMP4	BA_593036_011434	AATCACCATTTACCCCGAGTAATTAGAGATAATGAAACACCTCTAAAATCAGGTTATGGAGAAGGGAGCTGTTGGATTGGTTTAAAGGGTGGCCTTCCGTAAACTGTTAAAGGATTCCCA	1	+	chr14:47010654-47010773
BMP4	BA_593036_011435	GAAGGGAGCTGTTGGATTGGTTTAAAGGGTGGCCTTCCGTAAACTGTTAAAGGATTCCCAAACGTTGAAACAGGCTGTGAGCAGGGCTGTGTGCCCGAAGGAGATACCTCTTCAACTATT	1	+	chr14:47010714-47010833
BMP4	BA_593036_011436	AACGTTGAAACAGGCTGTGAGCAGGGCTGTGTGCCCGAAGGAGATACCTCTTCAACTATTAGGAGGTGACTTTCCCCCCAAAAAAGTTTTTGTGAGATGTTTCTTGTGGACATTTGAGAA	1	+	chr14:47010774-47010893
BMP4	BA_593036_011437	AGGAGGTGACTTTCCCCCCAAAAAAGTTTTTGTGAGATGTTTCTTGTGGACATTTGAGAATTGCACCAACCCCCCTTAAACTGGGTGCCCTCCATCGATCCCCCAGGTCTAACATTTCAA	1	+	chr14:47010834-47010953
BMP4	BA_593036_011438	TTGCACCAACCCCCCTTAAACTGGGTGCCCTCCATCGATCCCCCAGGTCTAACATTTCAAGTGCACAGAGGTAGTTTGCAGGCACTTGGCAGGCAAACAGGCCTAGGCCTTGTAAGACAA	1	+	chr14:47010894-47011013
BMP4	BA_593036_011439	GTGCACAGAGGTAGTTTGCAGGCACTTGGCAGGCAAACAGGCCTAGGCCTTGTAAGACAATTAGAAAATCCTATTTATATCTCTGAAGCCTTCTTAACTGCCAGATGGTTATTTTGTTTG	1	+	chr14:47010954-47011073
BMP5	BA_593036_005872	TGAGACACCTCTCGGAAAAGAAAAATAAAACATTAGAATTTCACCACAGTTCTAGAATTCACTGGATAAATTTACCTTGCTATCGGAATGCTGTCCCAGACAATGAAAGCACTGTAAATG	1	+	chr9:75622081-75622200
BMP5	BA_593036_005873	ACTGGATAAATTTACCTTGCTATCGGAATGCTGTCCCAGACAATGAAAGCACTGTAAATGCTAAGGTTAAATGCGTGCCTGAGAGGAAAATTATAGCAGGCAGAGAAACATTGCAGACTT	1	+	chr9:75622141-75622260
BMP5	BA_593036_005874	CTAAGGTTAAATGCGTGCCTGAGAGGAAAATTATAGCAGGCAGAGAAACATTGCAGACTTCCAAATTTTAAAGGCATTAACCATTAAGGATAAACACATACTTCGCTCATTTCCTCAGAT	1	+	chr9:75622201-75622320
BMP5	BA_593036_005875	CCAAATTTTAAAGGCATTAACCATTAAGGATAAACACATACTTCGCTCATTTCCTCAGATTAGGTATGGCATTTTAGAAAGGTGCACACTTTCTCTATTCTACCCATCAAAATTCAGAAA	1	+	chr9:75622261-75622380
BMP5	BA_593036_005876	TAGGTATGGCATTTTAGAAAGGTGCACACTTTCTCTATTCTACCCATCAAAATTCAGAAATTCCACTTCCAATTTGTGTGTAGTCACGCAGGGTACCTGATCTTTAGCAAACAAACTGGT	1	+	chr9:75622321-75622440
BMP5	BA_593036_005877	TTCCACTTCCAATTTGTGTGTAGTCACGCAGGGTACCTGATCTTTAGCAAACAAACTGGTGTTTATTTGTACAACTTAAAACAAATCAAAGTACTGAGTGCACTTAGTAATAAATATCTT	1	+	chr9:75622381-75622500
BMP5	BA_593036_005878	GTTTATTTGTACAACTTAAAACAAATCAAAGTACTGAGTGCACTTAGTAATAAATATCTTGTAGTAAGCATGACTACATTTCGGTGGTGATGGAGTAAAAGTTAAGGAAGATAATACTAT	1	+	chr9:75622441-75622560
BMP5	BA_593036_005879	GTAGTAAGCATGACTACATTTCGGTGGTGATGGAGTAAAAGTTAAGGAAGATAATACTATAAATGAGATATTTCTATTTCAACTATTGATATAGTCAGAAATAAATATTATTTCTGCTTA	1	+	chr9:75622501-75622620
BMP5	BA_593036_005880	AAATGAGATATTTCTATTTCAACTATTGATATAGTCAGAAATAAATATTATTTCTGCTTAAATCTTTTCTACAGATAATTAAGTTGGAGCTATCTAATTCTTATCCCTGAATTACAAGTG	1	+	chr9:75622561-75622680
BMP5	BA_593036_005881	AATCTTTTCTACAGATAATTAAGTTGGAGCTATCTAATTCTTATCCCTGAATTACAAGTGCTCTTTCTTTGGAATCGAATATATTTACTAATAATTCATTGTCTACTTTTTCTTACTTTA	1	+	chr9:75622621-75622740
BMP5	BA_593036_005882	CTCTTTCTTTGGAATCGAATATATTTACTAATAATTCATTGTCTACTTTTTCTTACTTTAAAATAGCCAGTTGTCGTTAAGAATCAATAAATTTATTCCAATTTTAAAAATTGTCTTTTC	1	+	chr9:75622681-75622800
BMP5	BA_593036_005883	AAATAGCCAGTTGTCGTTAAGAATCAATAAATTTATTCCAATTTTAAAAATTGTCTTTTCAGTTTTTAAGAAGTAAATTTTAATGACTTTCAAAAGCTAGAAATAATCTCAAGTATGGCA	1	+	chr9:75622741-75622860
BMP5	BA_593036_005884	AGTTTTTAAGAAGTAAATTTTAATGACTTTCAAAAGCTAGAAATAATCTCAAGTATGGCACTGAGTCATACCAAGTTAATTTGCTACAACCTGAGACTTAATATAGAAGTGTATTAAATG	1	+	chr9:75622801-75622920
BMP5	BA_593036_005885	CTGAGTCATACCAAGTTAATTTGCTACAACCTGAGACTTAATATAGAAGTGTATTAAATGCATTCCATCAAAAAGCCTAAAACATTTCTGTATGGCTGGGTGGCAACGTTTTCAGCCTGT	1	+	chr9:75622861-75622980
BMP5	BA_593036_005886	CATTCCATCAAAAAGCCTAAAACATTTCTGTATGGCTGGGTGGCAACGTTTTCAGCCTGTTACTTGAAAACTGGCTTTTATCCTCCCTGGAACGCGTACACCCCATAGATCACTGTTGTC	1	+	chr9:75622921-75623040
BMP5	BA_593036_005887	TACTTGAAAACTGGCTTTTATCCTCCCTGGAACGCGTACACCCCATAGATCACTGTTGTCTGTTACATGCATGGCCATAAAATTGCGAAAATGGAGGCTTTTCTGGTAGCAAAAGGGTTA	1	+	chr9:75622981-75623100
BMP5	BA_593036_005888	TGTTACATGCATGGCCATAAAATTGCGAAAATGGAGGCTTTTCTGGTAGCAAAAGGGTTAACTTCTTTTTGCTTTACCAGTTTCAAATTACAAGGAGAAGCCTCTTCTTTCCCAGCAGGG	1	+	chr9:75623041-75623160
BMP5	BA_593036_005889	ACTTCTTTTTGCTTTACCAGTTTCAAATTACAAGGAGAAGCCTCTTCTTTCCCAGCAGGGCTGTGCTTACATTTCTCCTTAGATCTCTCTTGAAGAGGGCTGGTATATTTGTGCCTGCTG	1	+	chr9:75623101-75623220
BMP5	BA_593036_005890	CTGTGCTTACATTTCTCCTTAGATCTCTCTTGAAGAGGGCTGGTATATTTGTGCCTGCTGGAGGTGGAATTAACTGTAAGAAGGGGGGAAGAGATTGAATGGATTTACAGGGAGGATTGC	1	+	chr9:75623161-75623280
BMP5	BA_593036_005891	GAGGTGGAATTAACTGTAAGAAGGGGGGAAGAGATTGAATGGATTTACAGGGAGGATTGCAAGTAAATTCAGGGAAACACATTTACTTGAACACTATAACCTTGGGTCTTGTTTTACACT	1	+	chr9:75623221-75623340
BMP5	BA_593036_005892	AAGTAAATTCAGGGAAACACATTTACTTGAACACTATAACCTTGGGTCTTGTTTTACACTAAGACCATACAAAAGATGTTCAAGTTATCACTAGGCTGCCGGACAAATCTAATTCCAACA	1	+	chr9:75623281-75623400
BMP5	BA_593036_005893	AAGACCATACAAAAGATGTTCAAGTTATCACTAGGCTGCCGGACAAATCTAATTCCAACACCAAGGTGCAGATCAGCGTAGATCTGTGATTCAGACCTCAGGATTTGCTTTGGAAAGAGT	1	+	chr9:75623341-75623460
BMP5	BA_593036_005894	CCAAGGTGCAGATCAGCGTAGATCTGTGATTCAGACCTCAGGATTTGCTTTGGAAAGAGTTCAAGTGTTGAGAAGAAGTCAGAGCAAGTGAAGAGAACTTGGGAGCTACAGTCTATCAGA	1	+	chr9:75623401-75623520
BMP5	BA_593036_005895	TCAAGTGTTGAGAAGAAGTCAGAGCAAGTGAAGAGAACTTGGGAGCTACAGTCTATCAGAAGACCAGCTTTCGTCAGTTCAAATACCAAAGGCCTGATTAGCATAAATTCACATAGGAAT	1	+	chr9:75623461-75623580
BMP5	BA_593036_005896	AGACCAGCTTTCGTCAGTTCAAATACCAAAGGCCTGATTAGCATAAATTCACATAGGAATGCATAGGTTATTTGATCAAATAATTTTAACCAGCTTTTGCTACATCAACCTCTCAAAAGT	1	+	chr9:75623521-75623640
BMP5	BA_593036_005897	GCATAGGTTATTTGATCAAATAATTTTAACCAGCTTTTGCTACATCAACCTCTCAAAAGTTCTTAACAACTGTGGATAATTAGAAATCTGAATTTCAACTTTCTAAGGAATAACTACTCT	1	+	chr9:75623581-75623700
BMP5	BA_593036_005898	TCTTAACAACTGTGGATAATTAGAAATCTGAATTTCAACTTTCTAAGGAATAACTACTCTTGACGTGTTCTAAAATATTTAAAGCAGGAGAAGAAGATGGACTGAGGGCGCGGTGTTCAG	1	+	chr9:75623641-75623760
BMP5	BA_593036_005899	TGACGTGTTCTAAAATATTTAAAGCAGGAGAAGAAGATGGACTGAGGGCGCGGTGTTCAGAAATATCACTGTCATGAAGAACAGGTAAATTTGTTTTTACATCTCCTGGTGAAGTATACT	1	+	chr9:75623701-75623820
BMP5	BA_593036_005900	AAATATCACTGTCATGAAGAACAGGTAAATTTGTTTTTACATCTCCTGGTGAAGTATACTTCCAAGGAACCTGGATTATTATTTTTTTTCCAAGTGGACAAGAAGGATTAAAAATATCGA	1	+	chr9:75623761-75623880
BMP5	BA_593036_005901	TCCAAGGAACCTGGATTATTATTTTTTTTCCAAGTGGACAAGAAGGATTAAAAATATCGACTTTTGCTTTTGCACAAAAATGCATTGGACTGTATTTTTACTTAGGGGTATTGTGGGCTT	1	+	chr9:75623821-75623940
BMP5	BA_593036_005902	CTTTTGCTTTTGCACAAAAATGCATTGGACTGTATTTTTACTTAGGGGTATTGTGGGCTTCCTCTGGAGCGGCTGGGTTCAAGTGGGTTATGCAAAAGGAGGCTTGGGAGACAATCACGT	1	+	chr9:75623881-75624000
BMP5	BA_593036_005903	CCTCTGGAGCGGCTGGGTTCAAGTGGGTTATGCAAAAGGAGGCTTGGGAGACAATCACGTTCACTCCAGTTTTATTTATAGAAGGCTACGGAACCATGAGAGACGGGAAATACAGAGGGA	1	+	chr9:75623941-75624060
BMP5	BA_593036_005904	TCACTCCAGTTTTATTTATAGAAGGCTACGGAACCATGAGAGACGGGAAATACAGAGGGAAATTCTGTCTATTTTGGGTTTGCCTCACAGACCCAGGCCCTTTTCACCAGGGAAACAAGC	1	+	chr9:75624001-75624120
BMP5	BA_593036_005905	AATTCTGTCTATTTTGGGTTTGCCTCACAGACCCAGGCCCTTTTCACCAGGGAAACAAGCATCTTCTGCCCCCCTCTTTATGCTGGATCTCTACAATGCCATGGCTAGCGAAGACAACCC	1	+	chr9:75624061-75624180
BMP5	BA_593036_005906	ATCTTCTGCCCCCCTCTTTATGCTGGATCTCTACAATGCCATGGCTAGCGAAGACAACCCTGAGGAGTCGGAGTATTTGGTGAGGGTGTCCCTGGCTGGAGAGGCCAAAGAGACAAGAAA	1	+	chr9:75624121-75624240
BMP5	BA_593036_005907	TGAGGAGTCGGAGTATTTGGTGAGGGTGTCCCTGGCTGGAGAGGCCAAAGAGACAAGAAAGGGATACCCAGCCTCTCCCAATGGGTATGCGCATCGTCTGCACTTACCACCAAGGACTCC	1	+	chr9:75624181-75624300
BMP5	BA_593036_005908	GGGATACCCAGCCTCTCCCAATGGGTATGCGCATCGTCTGCACTTACCACCAAGGACTCCTCTGACTACCCAGAGCCCACCTCTTGCCAGCCTACATGATACCAACTTTCTGAATGATGC	1	+	chr9:75624241-75624360
BMP5	BA_593036_005909	TCTGACTACCCAGAGCCCACCTCTTGCCAGCCTACATGATACCAACTTTCTGAATGATGCTGACATGGTCATGAGCTTTGTCAACTTAGGTATGTTATTCGTTTATTTGTTCATCTGTGT	1	+	chr9:75624301-75624420
BMP5	BA_593036_005910	TGACATGGTCATGAGCTTTGTCAACTTAGGTATGTTATTCGTTTATTTGTTCATCTGTGTTAGTATAAAGAGGAAGTTTTTCTAATGTTAAAGTAGCCTCTTGGTAGGTGGCCATGTTTA	1	+	chr9:75624361-75624480
BMP5	BA_593036_005911	TAGTATAAAGAGGAAGTTTTTCTAATGTTAAAGTAGCCTCTTGGTAGGTGGCCATGTTTATATATTCATTCTATAAAATTCCCCTTCATAGCTTCTGTTTCATTTTCTATGTAGATATAC	1	+	chr9:75624421-75624540
BMP5	BA_593036_005912	TATATTCATTCTATAAAATTCCCCTTCATAGCTTCTGTTTCATTTTCTATGTAGATATACGATTTTGTTTTATGCTACAGAGTCACATATTTTTTTTAACATGGAAAACTAAAATTAAAG	1	+	chr9:75624481-75624600
BMP5	BA_593036_005913	GATTTTGTTTTATGCTACAGAGTCACATATTTTTTTTAACATGGAAAACTAAAATTAAAGTCACAATTTGGATAGAATTTGGTCCTTTGAGAGCTTATTAAAATTTAATTTAAAGATGTG	1	+	chr9:75624541-75624660
BMP5	BA_593036_005914	TCACAATTTGGATAGAATTTGGTCCTTTGAGAGCTTATTAAAATTTAATTTAAAGATGTGCATAAAAGGCAATCCTGTAAAAAGGGAAAATTATTAGGATAGCAGTGCTTTGGGCAAAAG	1	+	chr9:75624601-75624720
BMP5	BA_593036_005915	ATGAAAAAAGCAAGGACCCAGTGTTTATGTGTGGGAAAATAAAACTAACTTTCCAAACCAATTTTTTTGTTAGTGATTTAAAGAGCATGTGAATACATATTTATATGCTACTTAAAAGTT	1	+	chr9:75624742-75624861
BMP5	BA_593036_005916	ATTTTTTTGTTAGTGATTTAAAGAGCATGTGAATACATATTTATATGCTACTTAAAAGTTCTCACCTAGGGGGGGAAAAATCTCTAAATGAAATTAGCCAAGATCAAATGAGCTGGTAAA	1	+	chr9:75624802-75624921
BMP5	BA_593036_005917	CTCACCTAGGGGGGGAAAAATCTCTAAATGAAATTAGCCAAGATCAAATGAGCTGGTAAATATTAGAAATCAAGGGGCTTCAGTGAGAAAAAATAGTTTAGAAAAGACGTTTCAGTCTCA	1	+	chr9:75624862-75624981
BMP5	BA_593036_005918	TATTAGAAATCAAGGGGCTTCAGTGAGAAAAAATAGTTTAGAAAAGACGTTTCAGTCTCACATTCCTTAAGTGTAATGATTAAAATGTAATCATATCTAGTTGATGTTTGACATAGGCAA	1	+	chr9:75624922-75625041
BMP5	BA_593036_005919	CATTCCTTAAGTGTAATGATTAAAATGTAATCATATCTAGTTGATGTTTGACATAGGCAAGATAGATATAAAACTTGATTTGATAGTATTTATCTATACCAAATTCTCCTTTGAGATAAA	1	+	chr9:75624982-75625101
BMP5	BA_593036_005920	GATAGATATAAAACTTGATTTGATAGTATTTATCTATACCAAATTCTCCTTTGAGATAAAAATTTTTAGTTGATAATTCCTAAAAATATCAACAAAGATAATGGAAAATAAGTCTTAAAA	1	+	chr9:75625042-75625161
BMP5	BA_593036_005921	AATTTTTAGTTGATAATTCCTAAAAATATCAACAAAGATAATGGAAAATAAGTCTTAAAATTATATTTCATTCAGTACTGGGGCTGTATGGTAATTTTTAAACATTGTCAATCTCACATG	1	+	chr9:75625102-75625221
BMP5	BA_593036_005922	TTATATTTCATTCAGTACTGGGGCTGTATGGTAATTTTTAAACATTGTCAATCTCACATGGAAGATCACTACCCATGCCCTCTCACAAGAATATTAAATAGCTTACCTACTTAAAATGAT	1	+	chr9:75625162-75625281
BMP5	BA_593036_005923	GAAGATCACTACCCATGCCCTCTCACAAGAATATTAAATAGCTTACCTACTTAAAATGATTTTACAAGGGCTGTTTTAACTTAAAATTCTTTAGTATAAACTAAAGATGAATTGACTATC	1	+	chr9:75625222-75625341
BMP5	BA_593036_005924	TTTACAAGGGCTGTTTTAACTTAAAATTCTTTAGTATAAACTAAAGATGAATTGACTATCTTTAGATGTTTAAAGGAAAGTAACATTAAACATGATTTAGTTTTAAGACTTAAAAATTTA	1	+	chr9:75625282-75625401
BMP5	BA_593036_005925	TTTAGATGTTTAAAGGAAAGTAACATTAAACATGATTTAGTTTTAAGACTTAAAAATTTAACCAACTAATTTAGTAAACTTTAAAGAATCAAGAACCTTACAAAGTAAAACCTTTAAAAA	1	+	chr9:75625342-75625461
BMP5	BA_593036_005926	ACCAACTAATTTAGTAAACTTTAAAGAATCAAGAACCTTACAAAGTAAAACCTTTAAAAATTTTCGTTGAAAATGAAGTCTGGGTTGACTTCAAGATATTTTACTCTATGCCTAGCAAAA	1	+	chr9:75625402-75625521
BMP5	BA_593036_005927	TTTTCGTTGAAAATGAAGTCTGGGTTGACTTCAAGATATTTTACTCTATGCCTAGCAAAAATGTTCTTGCATACTATCTCAAAGGAAATACTTTTTGAGAAGTCAGATAGCAACCAGTCT	1	+	chr9:75625462-75625581
BMP5	BA_593036_005928	ATGTTCTTGCATACTATCTCAAAGGAAATACTTTTTGAGAAGTCAGATAGCAACCAGTCTTGGTGACATGAGGCCAGGTTTGTAATGTATATTTCTTACTATGCTGTGGTCATTTACTCT	1	+	chr9:75625522-75625641
BMP6	BA_593036_003921	TGTAGTTTAAGAACTCAAATGCAGCCCAAACGAAGAAATAAATTGAAATATCCGACTGGAAACCTCCAGGACTCTGGTTTGGCTTGTCCTGCCCTCTTTGCAGCTAGTGTGTGAGCAGCT	1	+	chr13:38436407-38436526
BMP6	BA_593036_003922	AACCTCCAGGACTCTGGTTTGGCTTGTCCTGCCCTCTTTGCAGCTAGTGTGTGAGCAGCTTCCTCGCAGGGTGTGTCTTAACTTACAGCAGCTGCCTTTGAGAGCCACGTGTCTGCTAAA	1	+	chr13:38436467-38436586
BMP6	BA_593036_003923	TCCTCGCAGGGTGTGTCTTAACTTACAGCAGCTGCCTTTGAGAGCCACGTGTCTGCTAAACGCCTACATTCCATCAATAAGAGAAACTGAGCAGAGAAGGAGAAAACTGTCATACTATTT	1	+	chr13:38436527-38436646
BMP6	BA_593036_003924	CGCCTACATTCCATCAATAAGAGAAACTGAGCAGAGAAGGAGAAAACTGTCATACTATTTTCTCCTTCGGTAACGGCATGGATTAAATAGCTGTGTTTGCTTTTATTTAGCAGAGGAAGA	1	+	chr13:38436587-38436706
BMP6	BA_593036_003925	TCTCCTTCGGTAACGGCATGGATTAAATAGCTGTGTTTGCTTTTATTTAGCAGAGGAAGAAGAAAGTTTAGATCGGGGTCGTGATCGGATCTGTCTTCCTAGCAATGACCTCTTTGCCTT	1	+	chr13:38436647-38436766
BMP6	BA_593036_003926	AGAAAGTTTAGATCGGGGTCGTGATCGGATCTGTCTTCCTAGCAATGACCTCTTTGCCTTTCTTACCCGCCCAAGCAACTCCTGATGCCTCCAAGAATTCTGTGTGCTAGAAACCTACGC	1	+	chr13:38436707-38436826
BMP6	BA_593036_003927	TCTTACCCGCCCAAGCAACTCCTGATGCCTCCAAGAATTCTGTGTGCTAGAAACCTACGCTCGCTAGGCAGAGGCAAGGCCCTGGGAGAAGGGAGGGTGAAAGAAGGGGGTGGGCCTATG	1	+	chr13:38436767-38436886
BMP6	BA_593036_003928	TCGCTAGGCAGAGGCAAGGCCCTGGGAGAAGGGAGGGTGAAAGAAGGGGGTGGGCCTATGTAAATAGCCCGCAAGAGTCACCTCTCCATTGGCTGGTAGCCTGTCCGTTACCGAGTAGGG	1	+	chr13:38436827-38436946
BMP6	BA_593036_003929	TAAATAGCCCGCAAGAGTCACCTCTCCATTGGCTGGTAGCCTGTCCGTTACCGAGTAGGGCAGGGCGTTCCTGGGCTTGAGTGCGGTACCTGAGCGAGACGCGCAGCAGAAAGCCCACGT	1	+	chr13:38436887-38437006
BMP6	BA_593036_003930	CAGGGCGTTCCTGGGCTTGAGTGCGGTACCTGAGCGAGACGCGCAGCAGAAAGCCCACGTTGGCGGCGGCCGGGAGCGCAGTGCGCAGAGGCGGGAGACTGCGAATCCCCGAGCCGACGC	2	+	chr13:38436947-38437066
BMP6	BA_593036_003931	TGGCGGCGGCCGGGAGCGCAGTGCGCAGAGGCGGGAGACTGCGAATCCCCGAGCCGACGCCGCAGCCTGCGTTCCGAGTTCCGCTCCTCGTCTCTCTCATCGCCTCGGAGAGCGGGATCC	2	+	chr13:38437007-38437126
BMP6	BA_593036_003932	CGCAGCCTGCGTTCCGAGTTCCGCTCCTCGTCTCTCTCATCGCCTCGGAGAGCGGGATCCTCCGGGCACCCGAGAGACTGCCGAGAGGAAAGCTAGATCGTGGCCGCCTCCACTTGGGGA	2	+	chr13:38437067-38437186
BMP6	BA_593036_003933	TCCGGGCACCCGAGAGACTGCCGAGAGGAAAGCTAGATCGTGGCCGCCTCCACTTGGGGAGGCGCGCGGAGATTCCGAGGGGGAGAGACGGTGCCCGAAGGCGGAGGGGCGCTGAGTTTC	2	+	chr13:38437127-38437246
BMP6	BA_593036_003934	GGCGCGCGGAGATTCCGAGGGGGAGAGACGGTGCCCGAAGGCGGAGGGGCGCTGAGTTTCGGACCAGAGGGAAGTTAAAACCGCGCGGAGAAAATTGGCTTTTTAGGACGCAGGGACGCC	1	+	chr13:38437187-38437306
BMP6	BA_593036_003935	GGACCAGAGGGAAGTTAAAACCGCGCGGAGAAAATTGGCTTTTTAGGACGCAGGGACGCCACAGCCTGGGACCCACAGGGGAGTAAACTTCACGACTGTCCTACAAGCCAGGAGAGGCGT	1	+	chr13:38437247-38437366
BMP6	BA_593036_003936	ACAGCCTGGGACCCACAGGGGAGTAAACTTCACGACTGTCCTACAAGCCAGGAGAGGCGTGCGAGGGGATGGTGCCCGGCATCGCCTCCACCTCTTGATCTGTCGTCTCCGGCCCCCCTC	1	+	chr13:38437307-38437426
BMP6	BA_593036_003937	GCGAGGGGATGGTGCCCGGCATCGCCTCCACCTCTTGATCTGTCGTCTCCGGCCCCCCTCGGCCAGCCGCCTCTGAGGGTTCAGGGCAGCGCACGTGTGCAGACTGCGAGTGACCGTGCC	2	+	chr13:38437367-38437486
BMP6	BA_593036_003938	GGCCAGCCGCCTCTGAGGGTTCAGGGCAGCGCACGTGTGCAGACTGCGAGTGACCGTGCCGTGACCCGCCCGGGGACGCCGGCTGCAGCGCAGTCCTGCCTAGGACACACCTGGCTCACT	2	+	chr13:38437427-38437546
BMP6	BA_593036_003939	GTGACCCGCCCGGGGACGCCGGCTGCAGCGCAGTCCTGCCTAGGACACACCTGGCTCACTCAGCCCGTGCGCCTCCAGAGACCTGCGGGAGAGTGGAGGATCCTGGCCGTCGCCCCGTCG	2	+	chr13:38437487-38437606
BMP6	BA_593036_003940	CAGCCCGTGCGCCTCCAGAGACCTGCGGGAGAGTGGAGGATCCTGGCCGTCGCCCCGTCGTCTCTTCTCCACCCGGGCTTCTGGGGGCGCCGCGGATGACCATGAGAGATAAGGACTGAG	2	+	chr13:38437547-38437666
BMP6	BA_593036_003941	TCTCTTCTCCACCCGGGCTTCTGGGGGCGCCGCGGATGACCATGAGAGATAAGGACTGAGTGCCAGGACCGGGAAGAGAGCCCGCCGAGAGGTGGCGGGGGCTGCCCACTCCGAGGGCCA	2	+	chr13:38437607-38437726
BMP6	BA_593036_003942	TGCCAGGACCGGGAAGAGAGCCCGCCGAGAGGTGGCGGGGGCTGCCCACTCCGAGGGCCACAGCCTCCGCGCTCCGGCCTCGCTCCGCCGCTCGACGCCTCGCGGGCCCCGCGGGGGCAG	2	+	chr13:38437667-38437786
BMP6	BA_593036_003943	TGGTGGGGGTTGCTGTGCAGCTGCGGCCCCCCGCCACTGCGGCCCCCTCTGCCGGTAGCCGCGGCCGCCGCCGGGGGGCAGCTGCTGGGAGCCGGCGGGAGCCCGGTGCGCGCTGAGCAG	2	+	chr13:38437841-38437960
BMP6	BA_593036_003944	GCGGCCGCCGCCGGGGGGCAGCTGCTGGGAGCCGGCGGGAGCCCGGTGCGCGCTGAGCAGCCACCGCCACAGTCCTCTTCTTCGGGCTTCCTCTATCGGCGGCTCAAGACCCACGAGAAG	2	+	chr13:38437901-38438020
BMP6	BA_593036_003945	CCACCGCCACAGTCCTCTTCTTCGGGCTTCCTCTATCGGCGGCTCAAGACCCACGAGAAGCGGGAGATGCAAAAGGAGATCCTGTCGGTGCTGGGGCTCCCGCACAGGCCGCGGCCCCTG	2	+	chr13:38437961-38438080
BMP6	BA_593036_003946	GCAGCAGCAGCAGCAGCAGACGGCCCGCGAGGAGCCCCCTCCAGGGCGGCTGAAGTCCGCTCCACTCTTCATGCTGGATCTCTACAACGCCCTGTCCAATGACGACGAAGAGGATGGGGC	2	+	chr13:38438131-38438250
BMP6	BA_593036_003947	TCCACTCTTCATGCTGGATCTCTACAACGCCCTGTCCAATGACGACGAAGAGGATGGGGCATCGGAGGGTGTGGGGCAAGAGCCTGGGTCCCACGGAGGGGCCAGCTCGTCCCAGCTCAG	1	+	chr13:38438191-38438310
BMP6	BA_593036_003948	ATCGGAGGGTGTGGGGCAAGAGCCTGGGTCCCACGGAGGGGCCAGCTCGTCCCAGCTCAGGCAGCCGTCTCCCGGCGCTGCACACTCCTTGAACCGCAAGAGTCTCCTGGCCCCGGGACC	2	+	chr13:38438251-38438370
BMP6	BA_593036_003949	GCAGCCGTCTCCCGGCGCTGCACACTCCTTGAACCGCAAGAGTCTCCTGGCCCCGGGACCCGGTGGCGGTGCGTCCCCACTGACTAGCGCGCAGGACAGCGCTTTCCTCAACGACGCGGA	2	+	chr13:38438311-38438430
BMP6	BA_593036_003950	CGGTGGCGGTGCGTCCCCACTGACTAGCGCGCAGGACAGCGCTTTCCTCAACGACGCGGACATGGTCATGAGCTTTGTGAACCTGGGTAAGGATTTTGGGGGTAGCATCGCGCGGAGGGT	1	+	chr13:38438371-38438490
BMP6	BA_593036_003951	CATGGTCATGAGCTTTGTGAACCTGGGTAAGGATTTTGGGGGTAGCATCGCGCGGAGGGTAGATCCCTCCTTTGCAGTCTCCTGGGCTCAGGTGGTGGGAAGAGGTGGAGGAGCGCGCGC	1	+	chr13:38438431-38438550
BMP6	BA_593036_003952	AGATCCCTCCTTTGCAGTCTCCTGGGCTCAGGTGGTGGGAAGAGGTGGAGGAGCGCGCGCGTGCGCGCGCGGCGGGGATGTGGGACAGCTGGTGCTCCGGACACCTGCGCGGCCGAGTGC	2	+	chr13:38438491-38438610
BMP6	BA_593036_003953	GTGCGCGCGCGGCGGGGATGTGGGACAGCTGGTGCTCCGGACACCTGCGCGGCCGAGTGCTCGCCTGCGCTCCGCTGCAATGGGAGGAGCTGGAACACGCAGAGGTGCCCGCAGAGGTTG	2	+	chr13:38438551-38438670
BMP6	BA_593036_003954	TCGCCTGCGCTCCGCTGCAATGGGAGGAGCTGGAACACGCAGAGGTGCCCGCAGAGGTTGTCTTTTTCGGGGAACATGGGGCACTTTTCCCTGTATTCTTATTTCTGACGAGCTCGGGCC	1	+	chr13:38438611-38438730
BMP6	BA_593036_003955	TCTTTTTCGGGGAACATGGGGCACTTTTCCCTGTATTCTTATTTCTGACGAGCTCGGGCCACTTCAACGCAAATGAGTTTGGCCAAGGTTCCTAAGAATAAGGTCCTCTGCACTCTTTCC	1	+	chr13:38438671-38438790
BMP6	BA_593036_003956	ACTTCAACGCAAATGAGTTTGGCCAAGGTTCCTAAGAATAAGGTCCTCTGCACTCTTTCCCCTCTGAACTGTCCTCCATTGCCCCCTGGACGTTCGGAGTGCCGCTTTACCCATAGTGAC	1	+	chr13:38438731-38438850
BMP6	BA_593036_003957	CCTCTGAACTGTCCTCCATTGCCCCCTGGACGTTCGGAGTGCCGCTTTACCCATAGTGACCGTCAGGGAATCCCCCAGCAGTTGAGAACTCCGAGAACCTGATCTGAATGCTTTAGAGAG	1	+	chr13:38438791-38438910
BMP6	BA_593036_003958	CGTCAGGGAATCCCCCAGCAGTTGAGAACTCCGAGAACCTGATCTGAATGCTTTAGAGAGATTCACAGGTGTTGAGGAAGGAGGGCTTCGGTGGCTGAGGAAGGTCCCACCAGGACCTTG	1	+	chr13:38438851-38438970
BMP6	BA_593036_003959	ATTCACAGGTGTTGAGGAAGGAGGGCTTCGGTGGCTGAGGAAGGTCCCACCAGGACCTTGGAAGGTGTGCCAATCCCCGCCAGGCGGGGCTTGCGTCAGTATGGGGCGAGATTCCAGCGC	1	+	chr13:38438911-38439030
BMP6	BA_593036_003960	GAAGGTGTGCCAATCCCCGCCAGGCGGGGCTTGCGTCAGTATGGGGCGAGATTCCAGCGCAATTGGGGTAATCCACCCAGTGCCTGCGCTCTCATGCCCTTGGCCATTGTCCCAAAAGGT	1	+	chr13:38438971-38439090
BMP6	BA_593036_003961	AATTGGGGTAATCCACCCAGTGCCTGCGCTCTCATGCCCTTGGCCATTGTCCCAAAAGGTTGACCCTTCAATCAATGCTGTCCAAGCTCCTGGGGGCAGAGAAAGGGTGCGGGGGTAGGG	1	+	chr13:38439031-38439150
BMP7	BA_593036_003700	GCTGATTGAGAGGCTCAGACAAGCTAGGCTTTGTCCTTTCAACATGAAAGAAAGAACGGACTGAAAGGTGTGTGTGCAGCCAGAGGAAGCCACCCAGCTGTGGCCTCCCCAGCATGCCCC	1	+	chr2:172763224-172763343
BMP7	BA_593036_003701	CTGAAAGGTGTGTGTGCAGCCAGAGGAAGCCACCCAGCTGTGGCCTCCCCAGCATGCCCCAGCTTGTACCCAAGGCCAGGGGGGGAGCAACCGCCCCCGCCAGGTTCCCAGCAGGGCCCT	2	+	chr2:172763284-172763403
BMP7	BA_593036_003702	AGCTTGTACCCAAGGCCAGGGGGGGAGCAACCGCCCCCGCCAGGTTCCCAGCAGGGCCCTGGGAGCCGCCCTGGAAGCCACCTGGCCCTTTGGGATGCAGGCGGCCAGCTGGGGCCATAC	2	+	chr2:172763344-172763463
BMP7	BA_593036_003703	GGGAGCCGCCCTGGAAGCCACCTGGCCCTTTGGGATGCAGGCGGCCAGCTGGGGCCATACTGCCAGACCTGAAACACAGAGACTGGCACCAAAGTCAGGGATTATCTATTGCTGCTTGAT	1	+	chr2:172763404-172763523
BMP7	BA_593036_003704	TGCCAGACCTGAAACACAGAGACTGGCACCAAAGTCAGGGATTATCTATTGCTGCTTGATGAGCCAGGCAAGGCGCTGAATTGTCAGCTAGGACCCACTGCCTTGCTGGAGATCACAGGA	1	+	chr2:172763464-172763583
BMP7	BA_593036_003705	GAGCCAGGCAAGGCGCTGAATTGTCAGCTAGGACCCACTGCCTTGCTGGAGATCACAGGAGAGAGCAGGAGAGGCCATAAGCTCTGACCCTCACGCAGGGAGAGGGCCTTGTTAAGCCTG	1	+	chr2:172763524-172763643
BMP7	BA_593036_003706	GAGAGCAGGAGAGGCCATAAGCTCTGACCCTCACGCAGGGAGAGGGCCTTGTTAAGCCTGGCTTCGGGATGGCCTCACAGATCCATGCTGACCACATGCTGCTAAGCATCTATTGAGGAC	1	+	chr2:172763584-172763703
BMP7	BA_593036_003707	GCTTCGGGATGGCCTCACAGATCCATGCTGACCACATGCTGCTAAGCATCTATTGAGGACTCTACTTTAGTTTAAGGTGATAAATCCACATATTAAAAAAAAGAACGGACACAGTGAAAG	1	+	chr2:172763644-172763763
BMP7	BA_593036_003708	TCTACTTTAGTTTAAGGTGATAAATCCACATATTAAAAAAAAGAACGGACACAGTGAAAGGCACCCTCCATCTGCCAGCAACCTAAGCCCTACCCCCAGGAAAATCTCTCTGCGATTGGC	1	+	chr2:172763704-172763823
BMP7	BA_593036_003709	GCACCCTCCATCTGCCAGCAACCTAAGCCCTACCCCCAGGAAAATCTCTCTGCGATTGGCCTTTCCTTCCCTCAGGACCTAGAGGCCTTTCCAAAGCAGGGCCTCTTCTTAACAAGTGTC	1	+	chr2:172763764-172763883
BMP7	BA_593036_003710	CTTTCCTTCCCTCAGGACCTAGAGGCCTTTCCAAAGCAGGGCCTCTTCTTAACAAGTGTCTAAGGAGAATTAGAATTTGCTCTATATTATTTTGGCAGCTCTATCACCAGCTTTTACACC	1	+	chr2:172763824-172763943
BMP7	BA_593036_003711	TAAGGAGAATTAGAATTTGCTCTATATTATTTTGGCAGCTCTATCACCAGCTTTTACACCCTGACCCTTGAGTCATTATTTTATATTTTTGACCTTTAATGGAGCCAGACAATATCTCCC	1	+	chr2:172763884-172764003
BMP7	BA_593036_003712	CTGACCCTTGAGTCATTATTTTATATTTTTGACCTTTAATGGAGCCAGACAATATCTCCCAGAAGCTCCAGGGCTTTTTATCTAGAGCTGAGAGGATTAACTGGGACCCTGTCTTCACGG	1	+	chr2:172763944-172764063
BMP7	BA_593036_003713	AGAAGCTCCAGGGCTTTTTATCTAGAGCTGAGAGGATTAACTGGGACCCTGTCTTCACGGAGATCCCTTCCGAGCCCCGGGTGCCCAGCGAGGGAGGGGTGGTCTTCAAGCTTCATTATT	1	+	chr2:172764004-172764123
BMP7	BA_593036_003714	AGATCCCTTCCGAGCCCCGGGTGCCCAGCGAGGGAGGGGTGGTCTTCAAGCTTCATTATTTCCAAGTTGACACGGCGGGAGCCCATGGTGCGTTTGGTGTCTTGACCTGGGGTTTTCTCA	1	+	chr2:172764064-172764183
BMP7	BA_593036_003715	TCCAAGTTGACACGGCGGGAGCCCATGGTGCGTTTGGTGTCTTGACCTGGGGTTTTCTCAGCAACTTCCACAAGCAGAATAAAAGCGACACAGGAAACGGCACTATCAGGACTTGTTATC	1	+	chr2:172764124-172764243
BMP7	BA_593036_003716	GCAACTTCCACAAGCAGAATAAAAGCGACACAGGAAACGGCACTATCAGGACTTGTTATCACCAAAGCCAAATATTTGATGATCTGCCCCACAGCGCACGGCTGGGGGTTAGTTTGAGCA	1	+	chr2:172764184-172764303
BMP7	BA_593036_003717	ACCAAAGCCAAATATTTGATGATCTGCCCCACAGCGCACGGCTGGGGGTTAGTTTGAGCAAGTTGAATACGTGTGCGCGCACAGCTGCAGGGGGAGCTGTCTCAGACCAGCCGCAACCCA	1	+	chr2:172764244-172764363
BMP7	BA_593036_003718	AGTTGAATACGTGTGCGCGCACAGCTGCAGGGGGAGCTGTCTCAGACCAGCCGCAACCCAGCCTCGCATCACTCACTGGGTTGGCTGGAACTCCAGCAGGGAAACGGGTTCCCCAGCCAT	1	+	chr2:172764304-172764423
BMP7	BA_593036_003719	GCCTCGCATCACTCACTGGGTTGGCTGGAACTCCAGCAGGGAAACGGGTTCCCCAGCCATTCCATGGCGGCCTCTGTTCCGAGGTCCCCAGCCACCCAATCGCCAAAACCCGTGGTTTGC	1	+	chr2:172764364-172764483
BMP7	BA_593036_003720	TCCATGGCGGCCTCTGTTCCGAGGTCCCCAGCCACCCAATCGCCAAAACCCGTGGTTTGCGCGCCACACGTGATAAACGCTGAAAATGGATTCTGCCCGCCCGGGACCTATCATTAAACA	1	+	chr2:172764424-172764543
BMP7	BA_593036_003721	GCGCCACACGTGATAAACGCTGAAAATGGATTCTGCCCGCCCGGGACCTATCATTAAACATTTAAAATAGAAAACTCGCAATGGCAACGTTCTTTCCCCGGCTCCAGCCGAGAGTCCAAA	1	+	chr2:172764484-172764603
BMP7	BA_593036_003722	TTTAAAATAGAAAACTCGCAATGGCAACGTTCTTTCCCCGGCTCCAGCCGAGAGTCCAAAGGTGGGCGACTGGCGGCTAGGCGAGGAGCCCCGCGGCACTCCGAGCGCACGCCGAAACCA	1	+	chr2:172764544-172764663
BMP7	BA_593036_003723	GGTGGGCGACTGGCGGCTAGGCGAGGAGCCCCGCGGCACTCCGAGCGCACGCCGAAACCAGCGCTCCGCAATGGGACAGGTAGGGTCAGAGAGGGGAAGAAAAGGGGATGCGCGGGATGT	2	+	chr2:172764604-172764723
BMP7	BA_593036_003724	GCGCTCCGCAATGGGACAGGTAGGGTCAGAGAGGGGAAGAAAAGGGGATGCGCGGGATGTCAGAACCAAGCTGGCCTCAGAGGGGCAGAGGAAAGGCGGGAAGGCAGCTTTGCCCACAAG	1	+	chr2:172764664-172764783
BMP7	BA_593036_003725	CAGAACCAAGCTGGCCTCAGAGGGGCAGAGGAAAGGCGGGAAGGCAGCTTTGCCCACAAGGGCCCTTTAAATCCAGGTAGCGCGGGCCGCTGAAGCCGGTTCAGCTCACATGACCCAGCC	1	+	chr2:172764724-172764843
BMP7	BA_593036_003726	GGCCCTTTAAATCCAGGTAGCGCGGGCCGCTGAAGCCGGTTCAGCTCACATGACCCAGCCGGGCGCTTTGAACTAAGCCGCTGCCGAGCCGGGACCTCCCGCCCCTGAGTGAGATGAACC	2	+	chr2:172764784-172764903
BMP7	BA_593036_003727	GGGCGCTTTGAACTAAGCCGCTGCCGAGCCGGGACCTCCCGCCCCTGAGTGAGATGAACCCGCGGCGGAGCAGACAGAGACTCAGGGCTGGGGGTGCACCCTCCGGATAGCCCGGACAAA	2	+	chr2:172764844-172764963
BMP7	BA_593036_003728	CGCGGCGGAGCAGACAGAGACTCAGGGCTGGGGGTGCACCCTCCGGATAGCCCGGACAAACCCTCCGAGCCAGCAAGACTTATCCGAGACGCACAGAGCTTAAAGTCTACTAAGACCCCG	1	+	chr2:172764904-172765023
BMP7	BA_593036_003729	CCCTCCGAGCCAGCAAGACTTATCCGAGACGCACAGAGCTTAAAGTCTACTAAGACCCCGGGGCGAAGAGTCTCTGGCGGGCACTGATGCTTTGCAAATGGAAAGGTGGACCACAGTGGC	1	+	chr2:172764964-172765083
BMP7	BA_593036_003730	GGGCGAAGAGTCTCTGGCGGGCACTGATGCTTTGCAAATGGAAAGGTGGACCACAGTGGCTGTAAGCAGAGACCCTCTCCCAGTCCCAAAGTGGCCCCAGTCTGAAATATATCCCCTCCC	1	+	chr2:172765024-172765143
BMP7	BA_593036_003731	TGTAAGCAGAGACCCTCTCCCAGTCCCAAAGTGGCCCCAGTCTGAAATATATCCCCTCCCACCGCCACTCACCTAGGTTGACGAAGCTCATGACCATGTCGGCGTCAGTGAGGAAGTGGC	1	+	chr2:172765084-172765203
BMP7	BA_593036_003732	ACCGCCACTCACCTAGGTTGACGAAGCTCATGACCATGTCGGCGTCAGTGAGGAAGTGGCTGTCCTGCAGGCTGGCTAAAGGGGGGCCCTGGGTACTGAAGACGGCCTTGTAGGGGTAGG	1	+	chr2:172765144-172765263
BMP7	BA_593036_003733	TGTCCTGCAGGCTGGCTAAAGGGGGGCCCTGGGTACTGAAGACGGCCTTGTAGGGGTAGGAGAAGCCCTGTCCGTCCGGCCCGCTCTCCTCCACCGCCATGGCGTTGTACAGGTCCAACA	1	+	chr2:172765204-172765323
BMP7	BA_593036_003734	AGAAGCCCTGTCCGTCCGGCCCGCTCTCCTCCACCGCCATGGCGTTGTACAGGTCCAACATGAACATGGGCGCCGAATTATGCTTTCCCTGGAGGTGCGGGCGCGGGCGATGGGGCAACC	2	+	chr2:172765264-172765383
BMP7	BA_593036_003735	TGAACATGGGCGCCGAATTATGCTTTCCCTGGAGGTGCGGGCGCGGGCGATGGGGCAACCCTAAGATGGACAGGATCTCCCGCTGCATCTCCCGCCGCTCCTGGCTGCGGAGGCGCCGGT	2	+	chr2:172765324-172765443
BMP7	BA_593036_003736	CTAAGATGGACAGGATCTCCCGCTGCATCTCCCGCCGCTCCTGGCTGCGGAGGCGCCGGTGGATGAAGCTGGAGTGCACCTCGTTGTCCAGGCTGAAATCGGCCAGGGCGGAGCGCAGCA	2	+	chr2:172765384-172765503
BMP7	BA_593036_003737	GGATGAAGCTGGAGTGCACCTCGTTGTCCAGGCTGAAATCGGCCAGGGCGGAGCGCAGCAAGAACAGAGGCGCCCAGAGCGCCACGAAGCTGTGTGGCGCCGCAGCGCGCAGCGAGCGCA	2	+	chr2:172765444-172765563
BMP7	BA_593036_003738	AGAACAGAGGCGCCCAGAGCGCCACGAAGCTGTGTGGCGCCGCAGCGCGCAGCGAGCGCACGTGCATCGCGCCGGCTCTACGCGCGATCCGGGGCACCGGGCCCGCGCCGCCCCAGGTGG	2	+	chr2:172765504-172765623
BMP7	BA_593036_003739	CGTGCATCGCGCCGGCTCTACGCGCGATCCGGGGCACCGGGCCCGCGCCGCCCCAGGTGGCAGCGGAGGGGGCAGGGCAGCGGTCCACGACCCGAGGTCACTTGCTGCAGGCGAGCTTCA	2	+	chr2:172765564-172765683
BMP7	BA_593036_003740	CAGCGGAGGGGGCAGGGCAGCGGTCCACGACCCGAGGTCACTTGCTGCAGGCGAGCTTCAAGGCGGCCTCGCCACACATGGCCACTCCCCGGCCGGCTGCGCTTTGCCCGGGACGCCCCT	2	+	chr2:172765624-172765743
BMP7	BA_593036_003741	AGGCGGCCTCGCCACACATGGCCACTCCCCGGCCGGCTGCGCTTTGCCCGGGACGCCCCTGTCCTTTACTCAGTTCTGGCCCGGGGCCCCTCGGCCCGCACTCGCCAGGACGCACGGCAA	2	+	chr2:172765684-172765803
BMP7	BA_593036_003742	GTCCTTTACTCAGTTCTGGCCCGGGGCCCCTCGGCCCGCACTCGCCAGGACGCACGGCAAGGCTAGCACAGCAACTCCAGAGAGCGAGCAAGAGAGCGAGGAGGCGGGCCGGGGTGGGAG	2	+	chr2:172765744-172765863
BMP7	BA_593036_003743	GGCTAGCACAGCAACTCCAGAGAGCGAGCAAGAGAGCGAGGAGGCGGGCCGGGGTGGGAGGAGCAGCAGCTTGCAGACCTACAAGTCCGGAGAGCGAGTGCCGGAGAGGCAGCTGGGCGC	2	+	chr2:172765804-172765923
BMP7	BA_593036_003744	GAGCAGCAGCTTGCAGACCTACAAGTCCGGAGAGCGAGTGCCGGAGAGGCAGCTGGGCGCTGAGCGAACCCTAGCTCCCTCCTCCCGCTCTGATCGCGCTCGGGCCCGCGGGCACCAGCA	2	+	chr2:172765864-172765983
BMP7	BA_593036_003745	TGAGCGAACCCTAGCTCCCTCCTCCCGCTCTGATCGCGCTCGGGCCCGCGGGCACCAGCAACAAACCCCTTTCCGATCTCCCGCGTGCCCAATACAAGGGCCCTGCGCGCCCGGATCGCC	2	+	chr2:172765924-172766043
BMP7	BA_593036_003746	ACAAACCCCTTTCCGATCTCCCGCGTGCCCAATACAAGGGCCCTGCGCGCCCGGATCGCCCGCCCGCCGCCTCGGGAGCCCCGGAGTTGGGCGCGCTGGGGCCGGGGAGCGGGGGAGGAG	2	+	chr2:172765984-172766103
BMP7	BA_593036_003747	CGCCCGCCGCCTCGGGAGCCCCGGAGTTGGGCGCGCTGGGGCCGGGGAGCGGGGGAGGAGCGGGAGGACTGACTTCCCCGCCCCTCCCGCTCCCGCTGCCTCCCACCTGCGCCTGTCCCC	2	+	chr2:172766044-172766163
BMP7	BA_593036_003748	CGGGAGGACTGACTTCCCCGCCCCTCCCGCTCCCGCTGCCTCCCACCTGCGCCTGTCCCCGCCCTCCCCAAGCCTGGCCCAATGGCTTCATTCATTCCTCCCAGGGCGCTCTACAAATAT	2	+	chr2:172766104-172766223
BMP8A	BA_593036_006652	ATGTCTATAGGTCCCTGGAGAAAGGAGGAGCCACGCTTCGGGAGAATGGACTCACAGCTGCCCCTTGGGTCACTCACTGGCCTGAACACTCTCCGTGCCAGGCCAAGGTCCAGCTGCTAG	1	+	chr4:123019010-123019129
BMP8A	BA_593036_006653	CCCCTTGGGTCACTCACTGGCCTGAACACTCTCCGTGCCAGGCCAAGGTCCAGCTGCTAGAGCCCAGGCCCACAGGACTACAGTCATGTCTGAGTCTGTCCACTCCACCTCCTGACACTG	1	+	chr4:123019070-123019189
BMP8A	BA_593036_006654	AGCCCAGGCCCACAGGACTACAGTCATGTCTGAGTCTGTCCACTCCACCTCCTGACACTGCACCCCACCCAGTCACCCACAGAAAGAGCCCGCTGTCCGGGCGTGAGGGTCAGCTCTGGT	1	+	chr4:123019130-123019249
BMP8A	BA_593036_006655	CACCCCACCCAGTCACCCACAGAAAGAGCCCGCTGTCCGGGCGTGAGGGTCAGCTCTGGTCATTTTGATATGACCACAGGTTTCCACACTGAACTTTGTCCCTCCCTCTCTTCAGGGCTG	1	+	chr4:123019190-123019309
BMP8A	BA_593036_006656	CATTTTGATATGACCACAGGTTTCCACACTGAACTTTGTCCCTCCCTCTCTTCAGGGCTGCGTTTATCACAGTGACAGCATCACGGTCTGGTTACTCATCAGTATACCCAGGACTGTTTT	1	+	chr4:123019250-123019369
BMP8A	BA_593036_006657	CGTTTATCACAGTGACAGCATCACGGTCTGGTTACTCATCAGTATACCCAGGACTGTTTTCCGATGCTACCTAGGGGACCTGGACATCTCCAGATCCCAACTCCTGGGTGCCTTAGTGGG	1	+	chr4:123019310-123019429
BMP8A	BA_593036_006658	CCGATGCTACCTAGGGGACCTGGACATCTCCAGATCCCAACTCCTGGGTGCCTTAGTGGGGCAAAGACCCTGGGCACAGGCGCAAAAAACGGACCTTCCAATCCTGATCTCCTGCAGTCG	1	+	chr4:123019370-123019489
BMP8A	BA_593036_006659	GCAAAGACCCTGGGCACAGGCGCAAAAAACGGACCTTCCAATCCTGATCTCCTGCAGTCGCCCCTCCCTGTGGTTTTACTGAACCATGGCTCCCTGTCCCAGGGGCCTTGTATTACCCGA	1	+	chr4:123019430-123019549
BMP8A	BA_593036_006660	CCCCTCCCTGTGGTTTTACTGAACCATGGCTCCCTGTCCCAGGGGCCTTGTATTACCCGAGGGCATCATCCCCCGACAGGCGGCCACCCTCTCCTCCACCTACCGCCCCATCCGGATCCC	2	+	chr4:123019490-123019609
BMP8A	BA_593036_006661	GGGCATCATCCCCCGACAGGCGGCCACCCTCTCCTCCACCTACCGCCCCATCCGGATCCCTGACGCCCTGCACTCACCCATGTTGACGAAGCTCATGACCAGGTCGGCACGGCCTAAGTG	2	+	chr4:123019550-123019669
BMP8A	BA_593036_006662	TGACGCCCTGCACTCACCCATGTTGACGAAGCTCATGACCAGGTCGGCACGGCCTAAGTGAGCCTGTGGTGGCCCGCCGTCGTCGTCATCGGTCATGGCGTGGTATAGGTCCAACATGAA	1	+	chr4:123019610-123019729
BMP8A	BA_593036_006663	AGCCTGTGGTGGCCCGCCGTCGTCGTCATCGGTCATGGCGTGGTATAGGTCCAACATGAAGAGGGGCGCGGACGCTGGCTGCCGGGCAGCGGCGGGTTGTGCACGGGGTCGGGGCCGTCC	2	+	chr4:123019670-123019789
BMP8A	BA_593036_006664	GAGGGGCGCGGACGCTGGCTGCCGGGCAGCGGCGGGTTGTGCACGGGGTCGGGGCCGTCCCGGTAGCCCGAGCACCGCCAGGATTTCACGCTGCATGTCGCGGCGCTCGCGCGCTCCCAG	2	+	chr4:123019730-123019849
BMP8A	BA_593036_006665	CGGTAGCCCGAGCACCGCCAGGATTTCACGCTGCATGTCGCGGCGCTCGCGCGCTCCCAGGCGACGCTGGGGACAGGTGTGCGGGGGACGCGGACCGTGGCCGCCTCCCAGCGCGCACAG	2	+	chr4:123019790-123019909
BMP8A	BA_593036_006666	GCGACGCTGGGGACAGGTGTGCGGGGGACGCGGACCGTGGCCGCCTCCCAGCGCGCACAGAGCAAGGCCCAATAGCCAGAGTGGCCCGGGACGCATAGCCATCTCGGACTTTCAGCCGGC	2	+	chr4:123019850-123019969
BMP8A	BA_593036_006667	AGCAAGGCCCAATAGCCAGAGTGGCCCGGGACGCATAGCCATCTCGGACTTTCAGCCGGCGCGCATCCACTGGTAGCTGGTCGGGCTCGGGCGCTACGCCCAGACGGGGAGGACCAGACG	2	+	chr4:123019910-123020029
BMP8A	BA_593036_006668	GCGCATCCACTGGTAGCTGGTCGGGCTCGGGCGCTACGCCCAGACGGGGAGGACCAGACGGCGCACCTGTCGCTGGCAGCTTTACAGCAGCTGCTCACCACGCACTCGGCAGGCGATCGC	2	+	chr4:123019970-123020089
BMP8A	BA_593036_006669	GCGCACCTGTCGCTGGCAGCTTTACAGCAGCTGCTCACCACGCACTCGGCAGGCGATCGCCGCGTCGGTAGGTCCCTCAGAGCAACGTGGGCTCTCACGGCGCTGACTTGCGAGTGTCCG	2	+	chr4:123020030-123020149
BMP8A	BA_593036_006670	CGCGTCGGTAGGTCCCTCAGAGCAACGTGGGCTCTCACGGCGCTGACTTGCGAGTGTCCGCAGGAGGACTTTGGTGGCAGCTCAGACCGCCGAGCGCTCTTCCTCGGCCCCGCCCCTTCC	2	+	chr4:123020090-123020209
BMP8A	BA_593036_006671	CAGGAGGACTTTGGTGGCAGCTCAGACCGCCGAGCGCTCTTCCTCGGCCCCGCCCCTTCCCCGACCAGCCAATGGGATCACGGGGGCGGGTCCGAGTGCGGAAAGACGCCTGGGGATGGT	2	+	chr4:123020150-123020269
BMP8A	BA_593036_006672	CCGACCAGCCAATGGGATCACGGGGGCGGGTCCGAGTGCGGAAAGACGCCTGGGGATGGTCGCACTACTACTTGTGCGCGAAGTGGTGGGAGCCGCCTGGTGCACCCGTAGGTGGGAACG	2	+	chr4:123020210-123020329
BMP8A	BA_593036_006673	CGCACTACTACTTGTGCGCGAAGTGGTGGGAGCCGCCTGGTGCACCCGTAGGTGGGAACGAACGGGCTGAAGAGAGGCCTTTAAGGGTGTCTTGGGTCCCCATCCAGCTTCCGGGGCTCA	1	+	chr4:123020270-123020389
BMP8A	BA_593036_006674	AACGGGCTGAAGAGAGGCCTTTAAGGGTGTCTTGGGTCCCCATCCAGCTTCCGGGGCTCATACCTGGCTACACGAGGAGACATTGGGGCCTCTGAAGCAGGCACCAGGGTGGGATCCTGA	1	+	chr4:123020330-123020449
BMP8A	BA_593036_006675	TACCTGGCTACACGAGGAGACATTGGGGCCTCTGAAGCAGGCACCAGGGTGGGATCCTGAGTCCCGGAGCAGCGGTAGGACCCGTAGTGTCTCACCTTCTGCTCTGGAAGTCTCTGCATG	1	+	chr4:123020390-123020509
BMP8A	BA_593036_006676	GTCCCGGAGCAGCGGTAGGACCCGTAGTGTCTCACCTTCTGCTCTGGAAGTCTCTGCATGCGCCCCTAGTTCCGGCCGTCGGGGCGGGGCGGGTGCCAGCAGTGCAGCGAGGGTGGGGCA	2	+	chr4:123020450-123020569
BMP8A	BA_593036_006677	CGCCCCTAGTTCCGGCCGTCGGGGCGGGGCGGGTGCCAGCAGTGCAGCGAGGGTGGGGCACACATTCCGTTGCCAGCAGGAACCAGGGCCCAGCCCCCGCTACTCCTCCGCTCCAGACTT	2	+	chr4:123020510-123020629
BMP8A	BA_593036_006678	CACATTCCGTTGCCAGCAGGAACCAGGGCCCAGCCCCCGCTACTCCTCCGCTCCAGACTTCTTCTTCACCCAGCGGTTCCCTTTGTAGATCCAACCCAGGATAGGGCTCTGAGCCTCCTG	1	+	chr4:123020570-123020689
BMP8A	BA_593036_006679	CTTCTTCACCCAGCGGTTCCCTTTGTAGATCCAACCCAGGATAGGGCTCTGAGCCTCCTGAAGTAGGGTCACCTTCGCTTATCTCATTTGTGACAACTCCCCAGGGGCTTGCAAGAAAGA	1	+	chr4:123020630-123020749
BMP8A	BA_593036_006680	AAGTAGGGTCACCTTCGCTTATCTCATTTGTGACAACTCCCCAGGGGCTTGCAAGAAAGAGACCTTGCAAAAACTCCCTGACTGGTTCCGCCCCTTTATGCACTCCGGCCTCCCAAGGCG	1	+	chr4:123020690-123020809
BMP8A	BA_593036_006681	GACCTTGCAAAAACTCCCTGACTGGTTCCGCCCCTTTATGCACTCCGGCCTCCCAAGGCGGCTGCCACAGCACTGATACAGACCATAAAGGTGTTGGTGTGGCTCAAGTGGAGCAGCGAA	1	+	chr4:123020750-123020869
BMP8A	BA_593036_006682	GCTGCCACAGCACTGATACAGACCATAAAGGTGTTGGTGTGGCTCAAGTGGAGCAGCGAAAGAGCTCCGGGAGGCTGGAAGGAATAGAACAGGAAAGACGGAAGTCAGTAGGAGGAAAGC	1	+	chr4:123020810-123020929
BMP8A	BA_593036_006683	AGAGCTCCGGGAGGCTGGAAGGAATAGAACAGGAAAGACGGAAGTCAGTAGGAGGAAAGCACCCAGCAGAGGGACTGGCTGTGTCAAGACTGGGAGTGTCATAATGACAGGTAACAGGGC	1	+	chr4:123020870-123020989
BMP8A	BA_593036_006684	ACCCAGCAGAGGGACTGGCTGTGTCAAGACTGGGAGTGTCATAATGACAGGTAACAGGGCTTTCAGACCTATTAGTGTTTACAAGCCACTATAGGCACACAGCTGCCTCTTTTCCTTTTC	1	+	chr4:123020930-123021049
BMP8A	BA_593036_006685	ACCCCTCTCTTTCTTTCTTAGCTTACACAAAGCAATTTATTAACAAAATAATTTTTGAGAAATTCTGTTCACAGATCACGATGATCCCCCTTCCTTCAAGTTCTGTCACACGGGATGGGA	1	+	chr4:123021064-123021183
BMP8A	BA_593036_006686	AATTCTGTTCACAGATCACGATGATCCCCCTTCCTTCAAGTTCTGTCACACGGGATGGGAGTGACAACCTCAACCTGCCTAATCTTCACATTCCTGAACAAACAAGAGCGCTGAGGGTTG	1	+	chr4:123021124-123021243
BMP8A	BA_593036_006687	GTGACAACCTCAACCTGCCTAATCTTCACATTCCTGAACAAACAAGAGCGCTGAGGGTTGACTGGGCTCCAGATCCAGGGGGTCTTGGATCTGTTTCCACCTGCGGTCTGGAGTTTGATA	1	+	chr4:123021184-123021303
BMP8A	BA_593036_006688	ACTGGGCTCCAGATCCAGGGGGTCTTGGATCTGTTTCCACCTGCGGTCTGGAGTTTGATACGAGGGCAATGGCGCCCAGCTCCTTGCACCTCTGGTCCATATCGGTAACATCACTGAAGG	1	+	chr4:123021244-123021363
BMP8A	BA_593036_006689	CGAGGGCAATGGCGCCCAGCTCCTTGCACCTCTGGTCCATATCGGTAACATCACTGAAGGATGTAAAGATACAGTAGACACCGAATACATTCTGTCCTTCAGCCACTTGAGGTCTAAGAC	1	+	chr4:123021304-123021423
BMP8A	BA_593036_006690	ATGTAAAGATACAGTAGACACCGAATACATTCTGTCCTTCAGCCACTTGAGGTCTAAGACCGATAGCTTGTTTTTTTCCTTCCCCTTGGGAGGTGCTATTTCTGAATGTCTTCTCCAGAT	1	+	chr4:123021364-123021483
BMP8A	BA_593036_006691	CGATAGCTTGTTTTTTTCCTTCCCCTTGGGAGGTGCTATTTCTGAATGTCTTCTCCAGATTTCTATACCAGCCCTGCCCCGCTCTGAGGTAGGTTCTCACAATGTAGCATTGGCGGACCT	1	+	chr4:123021424-123021543
BMP8B	BA_593036_006605	TTTTTTTAAACCGTTTAGGGGATCACATCAAGATGATTTTGGTGGTGTGATTTATTTGGAATATTATTTTGAATCCACGCTAAAGAATTCATAGTTGGTCAAAACCCTTATGTAGCGCAC	1	+	chr4:122781527-122781646
BMP8B	BA_593036_006606	ATATTATTTTGAATCCACGCTAAAGAATTCATAGTTGGTCAAAACCCTTATGTAGCGCACTGTCTGTTAAGCCCTTTAACGCATATCCCTCTTGGTAGCCTCTCCAGCAGCCAACCACCC	1	+	chr4:122781587-122781706
BMP8B	BA_593036_006607	TGTCTGTTAAGCCCTTTAACGCATATCCCTCTTGGTAGCCTCTCCAGCAGCCAACCACCCAGTGCCTGAAGCTTTCTAGTTCCATTGTTGTGCGGCCTGAGGGAAGGTGTTTAAGCTCTG	1	+	chr4:122781647-122781766
BMP8B	BA_593036_006608	AGTGCCTGAAGCTTTCTAGTTCCATTGTTGTGCGGCCTGAGGGAAGGTGTTTAAGCTCTGTGTGCCTGGGTTTCCCTCCCGGATACTCCAGAGTCAATCTGAGGTTGGATTAGCCAGCAG	1	+	chr4:122781707-122781826
BMP8B	BA_593036_006609	TGTGCCTGGGTTTCCCTCCCGGATACTCCAGAGTCAATCTGAGGTTGGATTAGCCAGCAGTGTGGTCTGTCTGGGCCTGGCAGAGAATAGCTTGGCGCACAGAACCAGCGCTCATCGGTG	1	+	chr4:122781767-122781886
BMP8B	BA_593036_006610	TGTGGTCTGTCTGGGCCTGGCAGAGAATAGCTTGGCGCACAGAACCAGCGCTCATCGGTGAAGGAGGCGTCTTCCCCGGACAGCGGGGAAGGCACCTAGCAGACAGGAGCGGCGGAGTCC	1	+	chr4:122781827-122781946
BMP8B	BA_593036_006611	AAGGAGGCGTCTTCCCCGGACAGCGGGGAAGGCACCTAGCAGACAGGAGCGGCGGAGTCCGGGCCCTGGCAGCTTCTGGCGACAGAATGTGCCCCACCCTCGAGGCATGGTTGGCATCCG	2	+	chr4:122781887-122782006
BMP8B	BA_593036_006612	GGGCCCTGGCAGCTTCTGGCGACAGAATGTGCCCCACCCTCGAGGCATGGTTGGCATCCGCCCCGCCCCGACGGCCAGTCCAATGGGCGCTTCCGGAGACATGTGGGGCCCACCCCAGCT	2	+	chr4:122781947-122782066
BMP8B	BA_593036_006613	CCCCGCCCCGACGGCCAGTCCAATGGGCGCTTCCGGAGACATGTGGGGCCCACCCCAGCTCCCGGACTTGGGCGCTCTCCCAACTCTAAGCAATTCGCTCCAAGGTGCAGGTGTCTGCTT	2	+	chr4:122782007-122782126
BMP8B	BA_593036_006614	CCCGGACTTGGGCGCTCTCCCAACTCTAAGCAATTCGCTCCAAGGTGCAGGTGTCTGCTTCAGAGACACCGACGTCTCCGCGCGGAGCCCGGAGTGTGCCCAGGCAGATGGATGGGGGCC	2	+	chr4:122782067-122782186
BMP8B	BA_593036_006615	CAGAGACACCGACGTCTCCGCGCGGAGCCCGGAGTGTGCCCAGGCAGATGGATGGGGGCCCAGGACACCCATGATGGCTTCTCCCCGACCGGTGATACCTACCTCCGGGTCCCACTCGCT	2	+	chr4:122782127-122782246
BMP8B	BA_593036_006616	CAGGACACCCATGATGGCTTCTCCCCGACCGGTGATACCTACCTCCGGGTCCCACTCGCTCCCTCCACCCCCACCTTTAGTAGTAGCGGTACAGACACCCTGTAGACGTGTGTCCGCGCT	1	+	chr4:122782187-122782306
BMP8B	BA_593036_006617	CCCTCCACCCCCACCTTTAGTAGTAGCGGTACAGACACCCTGTAGACGTGTGTCCGCGCTCGGGCCCGCCCCAGAGCCCCCATTGGTTGAGTTCACTAAGGGGAGGAGCCGAGGAAGCGC	1	+	chr4:122782247-122782366
BMP8B	BA_593036_006618	CGGGCCCGCCCCAGAGCCCCCATTGGTTGAGTTCACTAAGGGGAGGAGCCGAGGAAGCGCTCCGGGTTCTAGTCCCCGAAAGTCGGTCCTGCTCCGGACACTCGCTATTCCCTACCGCGC	2	+	chr4:122782307-122782426
BMP8B	BA_593036_006619	TCCGGGTTCTAGTCCCCGAAAGTCGGTCCTGCTCCGGACACTCGCTATTCCCTACCGCGCGGGCCCACGTTGCTCTGCGGGACCTACAGGCTGGGCTGCTGCCTGCGGAGCGCGTGGAGC	2	+	chr4:122782367-122782486
BMP8B	BA_593036_006620	GGGCCCACGTTGCTCTGCGGGACCTACAGGCTGGGCTGCTGCCTGCGGAGCGCGTGGAGCGCAGTCGTCTTAGAGCTGCCCGCGACAGGTGCGAACTCGGGATCCGCGGCGCTGTCCCAT	2	+	chr4:122782427-122782546
BMP8B	BA_593036_006621	GCAGTCGTCTTAGAGCTGCCCGCGACAGGTGCGAACTCGGGATCCGCGGCGCTGTCCCATCCTTGTCGTCGAGGCGTCGCTGGATGCGAGTCCGCTAAACGTCCGAGATGGCTGCGCGTC	2	+	chr4:122782487-122782606
BMP8B	BA_593036_006622	CCTTGTCGTCGAGGCGTCGCTGGATGCGAGTCCGCTAAACGTCCGAGATGGCTGCGCGTCCGGGACTCCTATGGCTACTGGGCCTGGCTCTGTGCGTGTTGGGCGGCGGTCACCTCTCGC	2	+	chr4:122782547-122782666
BMP8B	BA_593036_006623	CGGGACTCCTATGGCTACTGGGCCTGGCTCTGTGCGTGTTGGGCGGCGGTCACCTCTCGCATCCCCCGCACGTCTTTCCCCAGCGTCGACTAGGAGTACGCGAGCCCCGCGACATGCAGC	2	+	chr4:122782607-122782726
BMP8B	BA_593036_006624	ATCCCCCGCACGTCTTTCCCCAGCGTCGACTAGGAGTACGCGAGCCCCGCGACATGCAGCGCGAGATTCGGGAGGTGCTGGGGCTGCCGGGGCGGCCCCGATCCCGAGCACCGGTCGGGG	2	+	chr4:122782667-122782786
BMP8B	BA_593036_006625	GCGAGATTCGGGAGGTGCTGGGGCTGCCGGGGCGGCCCCGATCCCGAGCACCGGTCGGGGCTGCCCAGCAGCCAGCGTCTGCGCCCCTCTTTATGTTGGACCTGTACCGTGCCATGACGG	2	+	chr4:122782727-122782846
BMP8B	BA_593036_006626	CTGCCCAGCAGCCAGCGTCTGCGCCCCTCTTTATGTTGGACCTGTACCGTGCCATGACGGATGACAGTGGCGGTGGGACCCCGCAGCCTCACTTGGACCGTGCTGACCTGATTATGAGCT	1	+	chr4:122782787-122782906
BMP8B	BA_593036_006627	ATGACAGTGGCGGTGGGACCCCGCAGCCTCACTTGGACCGTGCTGACCTGATTATGAGCTTTGTCAACATAGGTGAGTGTGCAGAGGGACCCAGGGTGTCCGCAGTCTCCACGTGGAGAG	1	+	chr4:122782847-122782966
BMP8B	BA_593036_006628	TTGTCAACATAGGTGAGTGTGCAGAGGGACCCAGGGTGTCCGCAGTCTCCACGTGGAGAGCGCATGGCTTCCTGTCTTGGAGGGACTATTCTAGCCATCTGACTGGGGATAGGCCTCTAG	1	+	chr4:122782907-122783026
BMP8B	BA_593036_006629	CGCATGGCTTCCTGTCTTGGAGGGACTATTCTAGCCATCTGACTGGGGATAGGCCTCTAGGAGCGTGAGGACCCTGCTTAGGGAATCGCTATGTGGCAGACTCATCACCCGGGAAGCAAG	1	+	chr4:122782967-122783086
BMP8B	BA_593036_006630	GAGCGTGAGGACCCTGCTTAGGGAATCGCTATGTGGCAGACTCATCACCCGGGAAGCAAGGACTACAGGGGTCAGGACTGGAAGGTCTGAGTGCTAGCGCAGGTTCCCCAGGCCTTGTCT	1	+	chr4:122783027-122783146
BMP8B	BA_593036_006631	GACTACAGGGGTCAGGACTGGAAGGTCTGAGTGCTAGCGCAGGTTCCCCAGGCCTTGTCTCACCATGATGCCTAGGAGTAGTTATCTGGTGATGCCCAGGTCCCCTAGGTGGCACCGGAA	1	+	chr4:122783087-122783206
BMP8B	BA_593036_006632	CACCATGATGCCTAGGAGTAGTTATCTGGTGATGCCCAGGTCCCCTAGGTGGCACCGGAAGTCAGTCCTGGGGAGACTGATGAGTAAATGATGCTGTCACTGTGATAAAAGCAGCCCTGA	1	+	chr4:122783147-122783266
BMP8B	BA_593036_006633	GTCAGTCCTGGGGAGACTGATGAGTAAATGATGCTGTCACTGTGATAAAAGCAGCCCTGAAGAGAGGGACAAAGTTCAGTGTGGAAACCTGTGGTCATATCAAAGTGACCAGAGCTGACC	1	+	chr4:122783207-122783326
BMP8B	BA_593036_006634	AGAGAGGGACAAAGTTCAGTGTGGAAACCTGTGGTCATATCAAAGTGACCAGAGCTGACCCTCACGCCCGGATGGCGGGCTCTTTCTGTGTAGTAGGAACTGGTGGGTGGGGTGCAGTGT	1	+	chr4:122783267-122783386
BMP8B	BA_593036_006635	CTCACGCCCGGATGGCGGGCTCTTTCTGTGTAGTAGGAACTGGTGGGTGGGGTGCAGTGTCAGGAGGTGGAGTGGACAGACTCAGACATGACTGTAGTCCTGTGGGCCTGGGCCCTAGCA	1	+	chr4:122783327-122783446
BMP8B	BA_593036_006636	CAGGAGGTGGAGTGGACAGACTCAGACATGACTGTAGTCCTGTGGGCCTGGGCCCTAGCAGCTGGACCTTGGCCTGGCACGGAGAGTGTTCAGGCCAGTGAGTGACCCAAGGGGCAGCTG	1	+	chr4:122783387-122783506
BMP8B	BA_593036_006637	GCTGGACCTTGGCCTGGCACGGAGAGTGTTCAGGCCAGTGAGTGACCCAAGGGGCAGCTGTGAGTCCATTCTCCCGAAGCGTGGCTCCTCCTTTCTCCAGGGACCTGTAGACATCAGGAC	1	+	chr4:122783447-122783566
BMP8B	BA_593036_006638	TGAGTCCATTCTCCCGAAGCGTGGCTCCTCCTTTCTCCAGGGACCTGTAGACATCAGGACCACTTTCTCCTACGAGTCTTAAAGGTCTTTTCCCCAAAACTTTTATCTGTAGCCATAAGC	1	+	chr4:122783507-122783626
BMP8B	BA_593036_006639	CACTTTCTCCTACGAGTCTTAAAGGTCTTTTCCCCAAAACTTTTATCTGTAGCCATAAGCATTTACTGTTGGTTCAGTCCCTACCTGCTTTGCTCCTGTCTGTAACAGACAGCCTGGGGC	1	+	chr4:122783567-122783686
BMP8B	BA_593036_006640	ATTTACTGTTGGTTCAGTCCCTACCTGCTTTGCTCCTGTCTGTAACAGACAGCCTGGGGCTAGGACTGGGTACCAGGACTTGAGCTGAGAGCAGGGCAAGCAAGGAAGGGCCTTGGCATG	1	+	chr4:122783627-122783746
BMP8B	BA_593036_006641	TAGGACTGGGTACCAGGACTTGAGCTGAGAGCAGGGCAAGCAAGGAAGGGCCTTGGCATGGCCACCAGCCTCTGTACCCGAGGAGCTGCTCGCCCTCCCAGCAGGCACAGTCTCTTATTT	1	+	chr4:122783687-122783806
BMP8B	BA_593036_006642	GCCACCAGCCTCTGTACCCGAGGAGCTGCTCGCCCTCCCAGCAGGCACAGTCTCTTATTTCCCAGGCAAGGTGAGGAAAGCAGTGGCCGCCTGGAAACTACCTGATAAGGCCCGGGCTGC	1	+	chr4:122783747-122783866
BMP8B	BA_593036_006643	CCCAGGCAAGGTGAGGAAAGCAGTGGCCGCCTGGAAACTACCTGATAAGGCCCGGGCTGCGTGGGTCTGCATCCAGTGCTCAGTTTTGTGACATTCCCTCCAGGGGAAGGAGAACTTTCC	1	+	chr4:122783807-122783926
BMP8B	BA_593036_006644	GTGGGTCTGCATCCAGTGCTCAGTTTTGTGACATTCCCTCCAGGGGAAGGAGAACTTTCCAGACTGTAAGCAGAGTGTGGGGGTGGGTAGCGGCAGGCCACCTTAAGGTAGGAAAAGGAC	1	+	chr4:122783867-122783986
BMP8B	BA_593036_006645	AGACTGTAAGCAGAGTGTGGGGGTGGGTAGCGGCAGGCCACCTTAAGGTAGGAAAAGGACAACCAAACCTCTGCTCTCTGCTCTACTGGTGGCTAAGGTGAGGTGGGGGTGGGAGTGGGG	1	+	chr4:122783927-122784046
BMP8B	BA_593036_006646	AGCACAGTGAAGGACAAGAAGGTTCTCTGGCAGCACTGAGAGCCCATGGCTAAGAGGGGCTGCAGCCAGTGGGATCTCGATACAACCAACATTTCTGCTTAAAGACCAGGCTTGCGTCCT	1	+	chr4:122784076-122784195
BMP8B	BA_593036_006647	TGCAGCCAGTGGGATCTCGATACAACCAACATTTCTGCTTAAAGACCAGGCTTGCGTCCTTAGGACACACTACATGTGGGACTTGAAACTGGCTCTCCATCCTCAGGACAGGCTGACCTA	1	+	chr4:122784136-122784255
BMP8B	BA_593036_006648	TAGGACACACTACATGTGGGACTTGAAACTGGCTCTCCATCCTCAGGACAGGCTGACCTATAGTGCAGGAATAGAAAAACTGAGCATAGCATTGCCCAAGAATGTCCCCAGGGGAATCTC	1	+	chr4:122784196-122784315
BMP8B	BA_593036_006649	TAGTGCAGGAATAGAAAAACTGAGCATAGCATTGCCCAAGAATGTCCCCAGGGGAATCTCTGATCAAAATGAGTCACCACCCAGCCCAGGCCTTACTCCCCTCCCCCAACTTTCTCTTTG	1	+	chr4:122784256-122784375
BMP8B	BA_593036_006650	TGATCAAAATGAGTCACCACCCAGCCCAGGCCTTACTCCCCTCCCCCAACTTTCTCTTTGGGTCAAGACATGAACAGCCCTGGTGGGAATAGCTGCTGTGAACAGAGCAGGGCCCAATAC	1	+	chr4:122784316-122784435
BMP8B	BA_593036_006651	GGTCAAGACATGAACAGCCCTGGTGGGAATAGCTGCTGTGAACAGAGCAGGGCCCAATACCAAAATGGGCCTTTGGGGATGTCATTTGCTCTCTCCAGGCTGGACATTACTCCCTTCTGG	1	+	chr4:122784376-122784495
BMPER	BA_593036_005444	ACTGTGAGCTGTGATATAGGAAGAGCTGAGTTTCCAGAGGCTTCTGTCCACCTTCTCATTCACAACTTCAAGGCTGGTGAAAAGGTTTCCCGTTTTTTTCCCTAGCCACCCATAGTAGAA	1	+	chr9:23025621-23025740
BMPER	BA_593036_005445	CACAACTTCAAGGCTGGTGAAAAGGTTTCCCGTTTTTTTCCCTAGCCACCCATAGTAGAAATGCCACACACATAGAGGGTAGAAGTCCCCACCCCCTAAAAAAATTAGTCATGCACACTG	1	+	chr9:23025681-23025800
BMPER	BA_593036_005446	ATGCCACACACATAGAGGGTAGAAGTCCCCACCCCCTAAAAAAATTAGTCATGCACACTGAGGAGACAGGCCAAGGGAGGCAAGTCAGAGGGGCAGGCATGCTCTTCAGGTGTCTTGCAG	1	+	chr9:23025741-23025860
BMPER	BA_593036_005447	AGGAGACAGGCCAAGGGAGGCAAGTCAGAGGGGCAGGCATGCTCTTCAGGTGTCTTGCAGTTTTGTAGTGCACATGTAGCCAAGTCTACAGACATCTGAGGGAACACTGGGTCTCCTAGG	1	+	chr9:23025801-23025920
BMPER	BA_593036_005448	TTTTGTAGTGCACATGTAGCCAAGTCTACAGACATCTGAGGGAACACTGGGTCTCCTAGGATCTCCAAAAATTCATGTTCCTTACCTGAATTATAAAGGTTACATTTATCTAGAGACTTT	1	+	chr9:23025861-23025980
BMPER	BA_593036_005449	ATCTCCAAAAATTCATGTTCCTTACCTGAATTATAAAGGTTACATTTATCTAGAGACTTTATTGAAGGAGAATCATTTTAGAGAGCAGGGACAGTGGTTCCTACTGAATGTACTTTTCTG	1	+	chr9:23025921-23026040
BMPER	BA_593036_005450	ATTGAAGGAGAATCATTTTAGAGAGCAGGGACAGTGGTTCCTACTGAATGTACTTTTCTGTGGCAATTATTATTTTTTAACTTTTAGGTTTTCTTCTAATTAGTTCTTATGGGAAGTAAA	1	+	chr9:23025981-23026100
BMPER	BA_593036_005451	TGGCAATTATTATTTTTTAACTTTTAGGTTTTCTTCTAATTAGTTCTTATGGGAAGTAAAACTCTGTCTCTGTCTCTCTCTCTCTCTGTGTATACAGTTTGACATTTCTGTAGACTCAGG	1	+	chr9:23026041-23026160
BMPER	BA_593036_005452	ACTCTGTCTCTGTCTCTCTCTCTCTCTGTGTATACAGTTTGACATTTCTGTAGACTCAGGGAGTCAGCGAAACATTCAATCAACACTTTGACTTTCAAGGCATCTAGCCATGGTGTTATT	1	+	chr9:23026101-23026220
BMPER	BA_593036_005453	GAGTCAGCGAAACATTCAATCAACACTTTGACTTTCAAGGCATCTAGCCATGGTGTTATTTGGGGGAAACATGTAACCACATTGTCTCTTGTCTCTTTTAATTTAAATTTTACACAAAAT	1	+	chr9:23026161-23026280
BMPER	BA_593036_005454	TGGGGGAAACATGTAACCACATTGTCTCTTGTCTCTTTTAATTTAAATTTTACACAAAATCTGTTTTGAGAGGGAAATGGAGCATGCTAAGCTAATGACAGCGTTCCTTCCTCCCACTTG	1	+	chr9:23026221-23026340
BMPER	BA_593036_005455	CTGTTTTGAGAGGGAAATGGAGCATGCTAAGCTAATGACAGCGTTCCTTCCTCCCACTTGTCCACGTCACAGAGATGTGGTCCTTGTGTTGGGATGTTGGCCACGATGCACTCACTAAAA	1	+	chr9:23026281-23026400
BMPER	BA_593036_005456	TCCACGTCACAGAGATGTGGTCCTTGTGTTGGGATGTTGGCCACGATGCACTCACTAAAAGCACCCTTTAAATCTCTAGAAAAAAACAAATGAGCATGCGGATGGCAGGCAGGGGCAGGT	1	+	chr9:23026341-23026460
BMPER	BA_593036_005457	GCACCCTTTAAATCTCTAGAAAAAAACAAATGAGCATGCGGATGGCAGGCAGGGGCAGGTAAATGTGGTGACATTAGAGGAGTGTATCTGAGGACTGTCAAAGGAGTTTCTCACTACAGC	1	+	chr9:23026401-23026520
BMPER	BA_593036_005458	AAATGTGGTGACATTAGAGGAGTGTATCTGAGGACTGTCAAAGGAGTTTCTCACTACAGCTACAAATGCTACCTAAAACTGGCCAGAGACTAGGGGAAAACTAGGCTTGTCAGCAATTAG	1	+	chr9:23026461-23026580
BMPER	BA_593036_005459	TACAAATGCTACCTAAAACTGGCCAGAGACTAGGGGAAAACTAGGCTTGTCAGCAATTAGAGTTTGGATCCACAAGGCGCTTCAGGAACTAATGTGGGGTGGGCACCTGCTGGCTGGCTG	1	+	chr9:23026521-23026640
BMPER	BA_593036_005460	AGTTTGGATCCACAAGGCGCTTCAGGAACTAATGTGGGGTGGGCACCTGCTGGCTGGCTGTTCTTCGTGTGGGTGGGAGCATGTGATCACAGTAGGCTCCAAAGAAGGCTAGCTGATCAT	1	+	chr9:23026581-23026700
BMPER	BA_593036_005461	TTCTTCGTGTGGGTGGGAGCATGTGATCACAGTAGGCTCCAAAGAAGGCTAGCTGATCATTGGTTCCAAGCACCTTTCACTCTCACCTGGCACCTTCCCAATGTAGTTATAAAAATTCTC	1	+	chr9:23026641-23026760
BMPER	BA_593036_005462	TGGTTCCAAGCACCTTTCACTCTCACCTGGCACCTTCCCAATGTAGTTATAAAAATTCTCTTTTCTAGATTAGCACCCCTTTTGAGTAGAGCCAGGCACTGCTTGGCGGGTGCGTGTAGG	1	+	chr9:23026701-23026820
BMPER	BA_593036_005463	TTTTCTAGATTAGCACCCCTTTTGAGTAGAGCCAGGCACTGCTTGGCGGGTGCGTGTAGGGCGGGTGTGTGTGTGTGTGGGGGGGGCAGGACGTGGGAGGGATGCTGGGACTCAGCGGGT	1	+	chr9:23026761-23026880
BMPER	BA_593036_005464	GCGGGTGTGTGTGTGTGTGGGGGGGGCAGGACGTGGGAGGGATGCTGGGACTCAGCGGGTACCGGGTGGCGGGGCGAGGGGATCAAAGACCGAGACTGGGGGACATCAGGGCCGCCCAAG	2	+	chr9:23026821-23026940
BMPER	BA_593036_005465	ACCGGGTGGCGGGGCGAGGGGATCAAAGACCGAGACTGGGGGACATCAGGGCCGCCCAAGCAAGAAACGCTGCAGGGTAGCGGCTGCCACCGCGTGCCCTGCTGGGCGGCCGCCGCGAAG	2	+	chr9:23026881-23027000
BMPER	BA_593036_005466	CAAGAAACGCTGCAGGGTAGCGGCTGCCACCGCGTGCCCTGCTGGGCGGCCGCCGCGAAGGCGGCCTGCGTGGAGATTAGCGGCAGCGGTCCCTCCCTGGCCCGCGAGTGAATGAATGAT	2	+	chr9:23026941-23027060
BMPER	BA_593036_005467	GCGGCCTGCGTGGAGATTAGCGGCAGCGGTCCCTCCCTGGCCCGCGAGTGAATGAATGATTAGTCTAACGCACCTCCCTGGCCCGGGCAGCTCCGGCTGGGAAGGGCGGAGTCTGAGCCA	2	+	chr9:23027001-23027120
BMPER	BA_593036_005468	TAGTCTAACGCACCTCCCTGGCCCGGGCAGCTCCGGCTGGGAAGGGCGGAGTCTGAGCCACCGATCCACGCTTTAAGGGAGAAAGGCTCTGGCCGTTGTGCGTGCATTAGCCGACCCTTT	1	+	chr9:23027061-23027180
BMPER	BA_593036_005469	CCGATCCACGCTTTAAGGGAGAAAGGCTCTGGCCGTTGTGCGTGCATTAGCCGACCCTTTCTGTCGCTCCAACTTCTGTCCTCCCTAATGTCAGGCCCACAGAGGCATAAGCACAGGAAC	1	+	chr9:23027121-23027240
BMPER	BA_593036_005470	CTGTCGCTCCAACTTCTGTCCTCCCTAATGTCAGGCCCACAGAGGCATAAGCACAGGAACCTGATCTCCAAGGTCACTCGTCCCTCTGTCCCCTCAGCCTCGTGAGTCCCCCGCCTTTGC	1	+	chr9:23027181-23027300
BMPER	BA_593036_005471	CTGATCTCCAAGGTCACTCGTCCCTCTGTCCCCTCAGCCTCGTGAGTCCCCCGCCTTTGCCCGAGGGAGTCAAAGGGCTGTGGAAAGTTGAGGGACCCTCCTGCATTCGATCCGTGGCTC	1	+	chr9:23027241-23027360
BMPER	BA_593036_005472	CCGAGGGAGTCAAAGGGCTGTGGAAAGTTGAGGGACCCTCCTGCATTCGATCCGTGGCTCCTTCCGAAGCTGGGGCAGCGGGAAGCGCCGGGTCTTCTGCTCCGGGCGCTAGCGGGTAGT	2	+	chr9:23027301-23027420
BMPER	BA_593036_005473	CTTCCGAAGCTGGGGCAGCGGGAAGCGCCGGGTCTTCTGCTCCGGGCGCTAGCGGGTAGTGGCATCCCTGCTGGGGGCGGCTCCTCTGCGCGGGAGGAGGCGGTGCGCAGGGCGCTGGAG	2	+	chr9:23027361-23027480
BMPER	BA_593036_005474	GGCATCCCTGCTGGGGGCGGCTCCTCTGCGCGGGAGGAGGCGGTGCGCAGGGCGCTGGAGACGCGCCTTCCAGGCTCCGGCAGCGCCCCGGGGCCGGTGGCCGGGGCTGGGCTAGACCGC	2	+	chr9:23027421-23027540
BMPER	BA_593036_005475	ACGCGCCTTCCAGGCTCCGGCAGCGCCCCGGGGCCGGTGGCCGGGGCTGGGCTAGACCGCCTGGCTGGGCGTTCGCGTGCGCCGCTGTCGCTTCTGAGCCGGCATAGCTCCGGCGCCAGG	2	+	chr9:23027481-23027600
BMPER	BA_593036_005476	CTGGCTGGGCGTTCGCGTGCGCCGCTGTCGCTTCTGAGCCGGCATAGCTCCGGCGCCAGGATCGTAGTCCCTCGTGCGACCCTGCGGATTCCGCGCAGAGCCTAGTACGCCCCTCGGTCC	2	+	chr9:23027541-23027660
BMPER	BA_593036_005477	ATCGTAGTCCCTCGTGCGACCCTGCGGATTCCGCGCAGAGCCTAGTACGCCCCTCGGTCCCGCACGGAGCAAGCGCGCGGGCCGGACACCGCGCTCGGGGGCCGGGCCGGAGCTGCGCGT	2	+	chr9:23027601-23027720
BMPER	BA_593036_005478	CGCACGGAGCAAGCGCGCGGGCCGGACACCGCGCTCGGGGGCCGGGCCGGAGCTGCGCGTGCGGGAGCCGGAGCTCAGCCGGGCTCCAGAGCTGCGAGCGCACTCGGCAGTCGCCGCCGC	2	+	chr9:23027661-23027780
BMPER	BA_593036_005479	GCGGGAGCCGGAGCTCAGCCGGGCTCCAGAGCTGCGAGCGCACTCGGCAGTCGCCGCCGCCGCTCCCCAGATCCCGCCGCTCAGCCACCCCTCCTCCCGGCCCAGCTCTGGCGCGGAGGG	2	+	chr9:23027721-23027840
BMPER	BA_593036_005480	CGCTCCCCAGATCCCGCCGCTCAGCCACCCCTCCTCCCGGCCCAGCTCTGGCGCGGAGGGGCTGACGGCTAACCCGCTGAGAGCAACTCCCTTAGAAAAAAGCCGCCGCATTGGCCGAGG	2	+	chr9:23027781-23027900
BMPER	BA_593036_005481	GCTGACGGCTAACCCGCTGAGAGCAACTCCCTTAGAAAAAAGCCGCCGCATTGGCCGAGGCTGGCCGCAGGACCCCTCCTCCCGGGGCGCCCCCACTCCTCCCCCGCCGCTCCGGGCGCC	2	+	chr9:23027841-23027960
BMPER	BA_593036_005482	CTGGCCGCAGGACCCCTCCTCCCGGGGCGCCCCCACTCCTCCCCCGCCGCTCCGGGCGCCCGCCTCCCTCAGCCGACTGTCTCCCGGCACGCCGGCCCACAGCCCTTTTGACTGCGAGCA	2	+	chr9:23027901-23028020
BMPER	BA_593036_005483	CGCCTCCCTCAGCCGACTGTCTCCCGGCACGCCGGCCCACAGCCCTTTTGACTGCGAGCAGCGGCTGCCGAGCAGAGGCGGCGACGCGGGACCTGCAGTCGCCCGGGATTCCCTCCAGGT	2	+	chr9:23027961-23028080
BMPER	BA_593036_005484	GCGGCTGCCGAGCAGAGGCGGCGACGCGGGACCTGCAGTCGCCCGGGATTCCCTCCAGGTGACGATGCTCTGGTTCTTCAGCGTCAGGGCTCTGGCTGAGCGTCCTTGCCGACGCTCGCC	2	+	chr9:23028021-23028140
BMPER	BA_593036_005485	GACGATGCTCTGGTTCTTCAGCGTCAGGGCTCTGGCTGAGCGTCCTTGCCGACGCTCGCCTGGGATTACCTGCTGCGTCTTGCTGCTGCTCAATTGCTCCGGGGTCCCCATGTCTCTGGC	1	+	chr9:23028081-23028200
BMPER	BA_593036_005486	TGGGATTACCTGCTGCGTCTTGCTGCTGCTCAATTGCTCCGGGGTCCCCATGTCTCTGGCTTCCTCCTTCCTGACAGGTAGGGGGGTGGGGGCGGGAGGGACCAGTCCTCCGGGACTCTG	1	+	chr9:23028141-23028260
BMPER	BA_593036_005487	TTCCTCCTTCCTGACAGGTAGGGGGGTGGGGGCGGGAGGGACCAGTCCTCCGGGACTCTGGGTGGTTTCTTGGGAGAAGAGGCACTGGCAGACCGGGGATGAGAGGACGAGGAACGCGCA	2	+	chr9:23028201-23028320
BMPER	BA_593036_005488	GGTGGTTTCTTGGGAGAAGAGGCACTGGCAGACCGGGGATGAGAGGACGAGGAACGCGCACCTTGCCTGACTCTCGCGGGCGGTGGGGATGCGGAGAAGCCTAGAGAAAAGGGATGGGAA	1	+	chr9:23028261-23028380
BMPER	BA_593036_005489	CCTTGCCTGACTCTCGCGGGCGGTGGGGATGCGGAGAAGCCTAGAGAAAAGGGATGGGAAGGCTATGAAGAGGTAGAGAGATGGGGGACTGAGAGACTGCTACCTTTGACAGAGTGCTAA	1	+	chr9:23028321-23028440
BMPER	BA_593036_005490	GGCTATGAAGAGGTAGAGAGATGGGGGACTGAGAGACTGCTACCTTTGACAGAGTGCTAATAGGCACCCTGCTATATGAAGTTGGGAAATTCCTTGATTTATATTTAATCTTTTTTCCCC	1	+	chr9:23028381-23028500
BMPER	BA_593036_005491	TAGGCACCCTGCTATATGAAGTTGGGAAATTCCTTGATTTATATTTAATCTTTTTTCCCCAATCCTTGTTTTAATCGTAGCCACTCTTGTGCAATTAAGGAAAAGACCGCGCCGTTTCCC	1	+	chr9:23028441-23028560
BMPER	BA_593036_005492	AATCCTTGTTTTAATCGTAGCCACTCTTGTGCAATTAAGGAAAAGACCGCGCCGTTTCCCGCACATCCTCTTTTCTCAACACCATAGGATTCCAATAAATCCACGGTGCTAGGCAGCATC	1	+	chr9:23028501-23028620
BMPER	BA_593036_005493	GCACATCCTCTTTTCTCAACACCATAGGATTCCAATAAATCCACGGTGCTAGGCAGCATCTTTAAAACATGACTTTCCAGACCTTGAATGTAAAGAAGCGATCTTATTTTTAAAGGTTAC	1	+	chr9:23028561-23028680
BMPER	BA_593036_005494	TTTAAAACATGACTTTCCAGACCTTGAATGTAAAGAAGCGATCTTATTTTTAAAGGTTACTAATAGCATGATATGATAATTACAGGTTTTCAGGCAGGTGAAGACCTCGGCTTCTATTTT	1	+	chr9:23028621-23028740
BMPER	BA_593036_005495	TAATAGCATGATATGATAATTACAGGTTTTCAGGCAGGTGAAGACCTCGGCTTCTATTTTGAAGGACATGCTTTACTGACACCTGGTGCAGAAAAGAGAATATTTTAAAGAGGAAAGAGA	1	+	chr9:23028681-23028800
BMPER	BA_593036_005496	GAAGGACATGCTTTACTGACACCTGGTGCAGAAAAGAGAATATTTTAAAGAGGAAAGAGATTGCGCTTCAAAAAGTGATTGCATTTCAACCCACAACAGTTGGCAGATCCACCTGAAAGG	1	+	chr9:23028741-23028860
BMPER	BA_593036_005497	TTGCGCTTCAAAAAGTGATTGCATTTCAACCCACAACAGTTGGCAGATCCACCTGAAAGGCCCGTTCTTTGACACAGTCCTGAATTTCGTTCAAATTTAAAATCTTCCCTAGTGCCTAGT	1	+	chr9:23028801-23028920
BMPR1A	BA_678916_000482	TATTTAAACCTCTGCGTCTCGGTTTCCTCTTCTAAAGCAACAAAGAATACAATAACCAGGGTTATCTTAAGAAGTAAATGGCGTGACACCGGTGCTAAGTTCGTATCATGTAGTCAGAAC	1	+	chr14:35314737-35314856
BMPR1A	BA_678916_000483	TCTAAAGCAACAAAGAATACAATAACCAGGGTTATCTTAAGAAGTAAATGGCGTGACACCGGTGCTAAGTTCGTATCATGTAGTCAGAACGGTTTGTAAGCTGTTTAAAAGAGAAAGCCT	1	+	chr14:35314767-35314886
BMPR1A	BA_678916_000484	GTTATCTTAAGAAGTAAATGGCGTGACACCGGTGCTAAGTTCGTATCATGTAGTCAGAACGGTTTGTAAGCTGTTTAAAAGAGAAAGCCTGCAGCTCTTTAACCAAATGAAAAAGATCCA	1	+	chr14:35314797-35314916
BMPR1A	BA_678916_000485	GGTGCTAAGTTCGTATCATGTAGTCAGAACGGTTTGTAAGCTGTTTAAAAGAGAAAGCCTGCAGCTCTTTAACCAAATGAAAAAGATCCACACCACGACTTACAAGTCACAAAAACGCCA	1	+	chr14:35314827-35314946
BMPR1A	BA_678916_000486	GGTTTGTAAGCTGTTTAAAAGAGAAAGCCTGCAGCTCTTTAACCAAATGAAAAAGATCCACACCACGACTTACAAGTCACAAAAACGCCAGGCACGACTAACACACGGCGTTATTATTTT	1	+	chr14:35314857-35314976
BMPR1A	BA_678916_000487	GCAGCTCTTTAACCAAATGAAAAAGATCCACACCACGACTTACAAGTCACAAAAACGCCAGGCACGACTAACACACGGCGTTATTATTTTTCTTCCCTGCCGCGTTGGAGGTTTGGGATT	1	+	chr14:35314887-35315006
BMPR1A	BA_678916_000488	CACCACGACTTACAAGTCACAAAAACGCCAGGCACGACTAACACACGGCGTTATTATTTTTCTTCCCTGCCGCGTTGGAGGTTTGGGATTTTTGGTTTTGGTTTTTTTTTTTTAATTTTT	1	+	chr14:35314917-35315036
BMPR1A	BA_678916_000489	TTAATTTTTAATTTTCCTTTTCTTTGCCAGATCTTTCCGCTAGGAGTCTGAAACGGGGGTTGGGGGGATGTAACGCAACCCAGCACAAAGTTTTACGAAATCGAAGTGCAGAATCACAAC	1	+	chr14:35315028-35315147
BMPR1A	BA_678916_000490	ATCTTTCCGCTAGGAGTCTGAAACGGGGGTTGGGGGGATGTAACGCAACCCAGCACAAAGTTTTACGAAATCGAAGTGCAGAATCACAACAGACATGGCAGCGGAGGCCGCGCAGAACAA	1	+	chr14:35315058-35315177
BMPR1A	BA_678916_000491	TGGGGGGATGTAACGCAACCCAGCACAAAGTTTTACGAAATCGAAGTGCAGAATCACAACAGACATGGCAGCGGAGGCCGCGCAGAACAACAGGTGAACCAACTCGCAGGGACGGAGGGG	1	+	chr14:35315088-35315207
BMPR1A	BA_678916_000492	TTTTACGAAATCGAAGTGCAGAATCACAACAGACATGGCAGCGGAGGCCGCGCAGAACAACAGGTGAACCAACTCGCAGGGACGGAGGGGGAAACCCGGCGCCTTCCCGCAGCCAAGTTG	1	+	chr14:35315118-35315237
BMPR1A	BA_678916_000493	AGACATGGCAGCGGAGGCCGCGCAGAACAACAGGTGAACCAACTCGCAGGGACGGAGGGGGAAACCCGGCGCCTTCCCGCAGCCAAGTTGGCGGGCGGGCCGAGCACTTCGCCCGGCCTC	2	+	chr14:35315148-35315267
BMPR1A	BA_678916_000494	CAGGTGAACCAACTCGCAGGGACGGAGGGGGAAACCCGGCGCCTTCCCGCAGCCAAGTTGGCGGGCGGGCCGAGCACTTCGCCCGGCCTCCGTCCCCGCACTGAACACGCTTCGTTCTCG	2	+	chr14:35315178-35315297
BMPR1A	BA_678916_000495	GAAACCCGGCGCCTTCCCGCAGCCAAGTTGGCGGGCGGGCCGAGCACTTCGCCCGGCCTCCGTCCCCGCACTGAACACGCTTCGTTCTCGTTCTCTAGCAGGGTCCCGAGACCCAGTCCC	2	+	chr14:35315208-35315327
BMPR1A	BA_678916_000496	GCGGGCGGGCCGAGCACTTCGCCCGGCCTCCGTCCCCGCACTGAACACGCTTCGTTCTCGTTCTCTAGCAGGGTCCCGAGACCCAGTCCCCGCAGCAGCCGCCGCGCAGCTCCGGAGCGG	2	+	chr14:35315238-35315357
BMPR1A	BA_678916_000497	CGTCCCCGCACTGAACACGCTTCGTTCTCGTTCTCTAGCAGGGTCCCGAGACCCAGTCCCCGCAGCAGCCGCCGCGCAGCTCCGGAGCGGGAGCAGAGCACCGTTCCCATTTAAGGCTTC	2	+	chr14:35315268-35315387
BMPR1A	BA_678916_000498	TTCTCTAGCAGGGTCCCGAGACCCAGTCCCCGCAGCAGCCGCCGCGCAGCTCCGGAGCGGGAGCAGAGCACCGTTCCCATTTAAGGCTTCCAGAAGCGTCCCCGGAGTGGTGCGAAGGCG	2	+	chr14:35315298-35315417
BMPR1A	BA_678916_000499	CGCAGCAGCCGCCGCGCAGCTCCGGAGCGGGAGCAGAGCACCGTTCCCATTTAAGGCTTCCAGAAGCGTCCCCGGAGTGGTGCGAAGGCGAACAAAAGGGCAAGCGCGGGCGGGCCGGGC	2	+	chr14:35315328-35315447
BMPR1A	BA_678916_000500	GGGCCGCGGGGCCGGGGGGTCTCTCCCGCAGGCCCCGCGGAGGCGCGTCGCGGCCTCCCCTGCGCCGCCACCGTCGCCCCCAAACTTCGCCGGCCTCCCGCGGCGCACCCGCACTCCGTC	2	+	chr14:35315444-35315563
BMPR1A	BA_678916_000501	GGCCCCGCGGAGGCGCGTCGCGGCCTCCCCTGCGCCGCCACCGTCGCCCCCAAACTTCGCCGGCCTCCCGCGGCGCACCCGCACTCCGTCGCCACCCGCCAACTCACCGGGATCCCGAGA	2	+	chr14:35315474-35315593
BMPR1A	BA_678916_000502	TGCGCCGCCACCGTCGCCCCCAAACTTCGCCGGCCTCCCGCGGCGCACCCGCACTCCGTCGCCACCCGCCAACTCACCGGGATCCCGAGAAACTCATCCTCCGGCGCTCGGCGCGGGCGG	2	+	chr14:35315504-35315623
BMPR1A	BA_678916_000503	TCCGCGCGGCGGGCAAGCAGATTCCAATCTCTGCCGCCTCAGCCGCGGAGGACGCTCGCTCGTTCGCGGGGCGGGGGAGGGGCAGCGGGGGAGGGGGGAGGGGCGGCTCGGGCGAGCAAG	2	+	chr14:35315804-35315923
BMPR1A	BA_678916_000504	CTGCCGCCTCAGCCGCGGAGGACGCTCGCTCGTTCGCGGGGCGGGGGAGGGGCAGCGGGGGAGGGGGGAGGGGCGGCTCGGGCGAGCAAGAGGCGCCGGCGCGCGCGCACTGGGAAGGGC	2	+	chr14:35315834-35315953
BMPR1A	BA_678916_000505	CGTTCGCGGGGCGGGGGAGGGGCAGCGGGGGAGGGGGGAGGGGCGGCTCGGGCGAGCAAGAGGCGCCGGCGCGCGCGCACTGGGAAGGGCCCGCCAGCTCTGCGCGCACCCGCGCCGGGG	2	+	chr14:35315864-35315983
BMPR1A	BA_678916_000506	GAGGGGGGAGGGGCGGCTCGGGCGAGCAAGAGGCGCCGGCGCGCGCGCACTGGGAAGGGCCCGCCAGCTCTGCGCGCACCCGCGCCGGGGCGCCGGCCCCGCCCCGGACACGAACCGAGC	2	+	chr14:35315894-35316013
BMPR1A	BA_678916_000507	AGGCGCCGGCGCGCGCGCACTGGGAAGGGCCCGCCAGCTCTGCGCGCACCCGCGCCGGGGCGCCGGCCCCGCCCCGGACACGAACCGAGCCGAGAGCTCGGCGGAAGCGCCCGAAGGGCC	2	+	chr14:35315924-35316043
BMPR1A	BA_678916_000508	CCGCCAGCTCTGCGCGCACCCGCGCCGGGGCGCCGGCCCCGCCCCGGACACGAACCGAGCCGAGAGCTCGGCGGAAGCGCCCGAAGGGCCCGTGGAGTTCGGCGCCCCTCTGCCGGGAAG	2	+	chr14:35315954-35316073
BMPR1A	BA_678916_000509	CGCCGGCCCCGCCCCGGACACGAACCGAGCCGAGAGCTCGGCGGAAGCGCCCGAAGGGCCCGTGGAGTTCGGCGCCCCTCTGCCGGGAAGGAGGCCCGGCCGCCGGCACGGGGGCGCCAG	2	+	chr14:35315984-35316103
BMPR1A	BA_678916_000510	CGAGAGCTCGGCGGAAGCGCCCGAAGGGCCCGTGGAGTTCGGCGCCCCTCTGCCGGGAAGGAGGCCCGGCCGCCGGCACGGGGGCGCCAGGTTTGCCGAGGGGAGGGGGTCGCCCCTCAG	2	+	chr14:35316014-35316133
BMPR1A	BA_678916_000511	CGTGGAGTTCGGCGCCCCTCTGCCGGGAAGGAGGCCCGGCCGCCGGCACGGGGGCGCCAGGTTTGCCGAGGGGAGGGGGTCGCCCCTCAGCGCACGCCGCCGCCGCCACCGCACGCGTGA	2	+	chr14:35316044-35316163
BMPR1A	BA_678916_000512	GAGGCCCGGCCGCCGGCACGGGGGCGCCAGGTTTGCCGAGGGGAGGGGGTCGCCCCTCAGCGCACGCCGCCGCCGCCACCGCACGCGTGACGGAGGGGCCCACTGGGGCAAAGCTGCGTG	2	+	chr14:35316074-35316193
BMPR1A	BA_678916_000513	GTTTGCCGAGGGGAGGGGGTCGCCCCTCAGCGCACGCCGCCGCCGCCACCGCACGCGTGACGGAGGGGCCCACTGGGGCAAAGCTGCGTGAAGTGGACGATGCGGGCACACTCCTTCTAG	2	+	chr14:35316104-35316223
BMPR1A	BA_678916_000514	CGCACGCCGCCGCCGCCACCGCACGCGTGACGGAGGGGCCCACTGGGGCAAAGCTGCGTGAAGTGGACGATGCGGGCACACTCCTTCTAGAGCCGGAGCTCGGGCTCCACGGGAGAAGCG	2	+	chr14:35316134-35316253
BMPR1A	BA_678916_000515	CGGAGGGGCCCACTGGGGCAAAGCTGCGTGAAGTGGACGATGCGGGCACACTCCTTCTAGAGCCGGAGCTCGGGCTCCACGGGAGAAGCGGCCCGGTGGCTCCGAGGGCACCGAGGCTCC	2	+	chr14:35316164-35316283
BMPR1A	BA_678916_000516	AAGTGGACGATGCGGGCACACTCCTTCTAGAGCCGGAGCTCGGGCTCCACGGGAGAAGCGGCCCGGTGGCTCCGAGGGCACCGAGGCTCCCGGTGCGGGATCGGTTGCCCGTCTCGTAGT	2	+	chr14:35316194-35316313
BMPR1A	BA_678916_000517	AGCCGGAGCTCGGGCTCCACGGGAGAAGCGGCCCGGTGGCTCCGAGGGCACCGAGGCTCCCGGTGCGGGATCGGTTGCCCGTCTCGTAGTTGTGGTTGCAAAGAAAGATGTAAGGCACAC	2	+	chr14:35316224-35316343
BMPR1A	BA_678916_000518	GCCCGGTGGCTCCGAGGGCACCGAGGCTCCCGGTGCGGGATCGGTTGCCCGTCTCGTAGTTGTGGTTGCAAAGAAAGATGTAAGGCACACTGCATTCATTACTCACCCCCTCCCTTCCCC	1	+	chr14:35316254-35316373
BMPR1A	BA_678916_000519	CGGTGCGGGATCGGTTGCCCGTCTCGTAGTTGTGGTTGCAAAGAAAGATGTAAGGCACACTGCATTCATTACTCACCCCCTCCCTTCCCCGTCCCCCGGTGCTCTCTGGTTCTGGCCCGC	1	+	chr14:35316284-35316403
BMPR1A	BA_678916_000520	TGTGGTTGCAAAGAAAGATGTAAGGCACACTGCATTCATTACTCACCCCCTCCCTTCCCCGTCCCCCGGTGCTCTCTGGTTCTGGCCCGCCGGGAGGAACGTGGAGGTGCACGCGTTCTC	1	+	chr14:35316314-35316433
BMPR1A	BA_678916_000521	TGCATTCATTACTCACCCCCTCCCTTCCCCGTCCCCCGGTGCTCTCTGGTTCTGGCCCGCCGGGAGGAACGTGGAGGTGCACGCGTTCTCCGGATCACGTAGCGAAAGCCTGGTTTCGGC	1	+	chr14:35316344-35316463
BMPR1A	BA_678916_000522	GTCCCCCGGTGCTCTCTGGTTCTGGCCCGCCGGGAGGAACGTGGAGGTGCACGCGTTCTCCGGATCACGTAGCGAAAGCCTGGTTTCGGCCCGGGGGCCCCGCCGCTGGGGTGGCTTGTG	2	+	chr14:35316374-35316493
BMPR1A	BA_678916_000523	CGGGAGGAACGTGGAGGTGCACGCGTTCTCCGGATCACGTAGCGAAAGCCTGGTTTCGGCCCGGGGGCCCCGCCGCTGGGGTGGCTTGTGATCCGCGGGCCTGCGAATTCCTCGGGCGTA	2	+	chr14:35316404-35316523
BMPR1A	BA_678916_000524	CGGATCACGTAGCGAAAGCCTGGTTTCGGCCCGGGGGCCCCGCCGCTGGGGTGGCTTGTGATCCGCGGGCCTGCGAATTCCTCGGGCGTAAGATAAGGAGCGGCGAGAGCCGGCTGAACT	2	+	chr14:35316434-35316553
BMPR1A	BA_678916_000525	CCGGGGGCCCCGCCGCTGGGGTGGCTTGTGATCCGCGGGCCTGCGAATTCCTCGGGCGTAAGATAAGGAGCGGCGAGAGCCGGCTGAACTGAAGTCAGCGGACTATAAATACGACTCTCA	1	+	chr14:35316464-35316583
BMPR1A	BA_678916_000526	ATCCGCGGGCCTGCGAATTCCTCGGGCGTAAGATAAGGAGCGGCGAGAGCCGGCTGAACTGAAGTCAGCGGACTATAAATACGACTCTCAATCCACCTTTGGCTCAGCCGAGTGACCTCG	1	+	chr14:35316494-35316613
BMPR1A	BA_678916_000527	AGATAAGGAGCGGCGAGAGCCGGCTGAACTGAAGTCAGCGGACTATAAATACGACTCTCAATCCACCTTTGGCTCAGCCGAGTGACCTCGGATACCCTCCCGAGGCTCTTTCCATCCTTT	1	+	chr14:35316524-35316643
BMPR1A	BA_678916_000528	GAAGTCAGCGGACTATAAATACGACTCTCAATCCACCTTTGGCTCAGCCGAGTGACCTCGGATACCCTCCCGAGGCTCTTTCCATCCTTTTAGAAAAATGCAAAGAACTGTCACTACCTC	1	+	chr14:35316554-35316673
BMPR1A	BA_678916_000529	ATCCACCTTTGGCTCAGCCGAGTGACCTCGGATACCCTCCCGAGGCTCTTTCCATCCTTTTAGAAAAATGCAAAGAACTGTCACTACCTCTTTTCTCCCTTTCCCCTCTCATTCGCCATG	1	+	chr14:35316584-35316703
BMPR1A	BA_678916_000530	GATACCCTCCCGAGGCTCTTTCCATCCTTTTAGAAAAATGCAAAGAACTGTCACTACCTCTTTTCTCCCTTTCCCCTCTCATTCGCCATGCAAAATGCCCTTAAAAGTATTCAGTGGCCT	1	+	chr14:35316614-35316733
BMPR1A	BA_678916_000531	TAGAAAAATGCAAAGAACTGTCACTACCTCTTTTCTCCCTTTCCCCTCTCATTCGCCATGCAAAATGCCCTTAAAAGTATTCAGTGGCCTGTGGATGAAGAAGGAAAAGATAATCCCTTT	1	+	chr14:35316644-35316763
BMPR1A	BA_678916_000532	TTTTCTCCCTTTCCCCTCTCATTCGCCATGCAAAATGCCCTTAAAAGTATTCAGTGGCCTGTGGATGAAGAAGGAAAAGATAATCCCTTTTTAAACCAGTCGTTAAATATATAACCTCTT	1	+	chr14:35316674-35316793
BMPR1A	BA_678916_000533	CAAAATGCCCTTAAAAGTATTCAGTGGCCTGTGGATGAAGAAGGAAAAGATAATCCCTTTTTAAACCAGTCGTTAAATATATAACCTCTTCCGTTTAAGTATTTCAACAAATATTTCGTA	1	+	chr14:35316704-35316823
BMPR1A	BA_678916_000534	GTGGATGAAGAAGGAAAAGATAATCCCTTTTTAAACCAGTCGTTAAATATATAACCTCTTCCGTTTAAGTATTTCAACAAATATTTCGTATTCGTTCTGTTAATTCACTTTTCTGAGAAA	1	+	chr14:35316734-35316853
BMPR1A	BA_678916_000535	TTAAACCAGTCGTTAAATATATAACCTCTTCCGTTTAAGTATTTCAACAAATATTTCGTATTCGTTCTGTTAATTCACTTTTCTGAGAAAACTATAAATCTCTTGGGAAATTGTTTAAAA	1	+	chr14:35316764-35316883
BMPR1A	BA_678916_000536	CCGTTTAAGTATTTCAACAAATATTTCGTATTCGTTCTGTTAATTCACTTTTCTGAGAAAACTATAAATCTCTTGGGAAATTGTTTAAAATAGACAGAAGAAAGAGTGAAGGAAGAAACT	1	+	chr14:35316794-35316913
BMPR1A	BA_678916_000537	TTCGTTCTGTTAATTCACTTTTCTGAGAAAACTATAAATCTCTTGGGAAATTGTTTAAAATAGACAGAAGAAAGAGTGAAGGAAGAAACTGTGCCAGGCACTTCATACTTGTGTATTTAC	1	+	chr14:35316824-35316943
BMPR1A	BA_678916_000538	ACTATAAATCTCTTGGGAAATTGTTTAAAATAGACAGAAGAAAGAGTGAAGGAAGAAACTGTGCCAGGCACTTCATACTTGTGTATTTACACACATTCTGGCCTGGAGGGAAAAAGCAAA	1	+	chr14:35316854-35316973
BMPR1A	BA_678916_000539	TAGACAGAAGAAAGAGTGAAGGAAGAAACTGTGCCAGGCACTTCATACTTGTGTATTTACACACATTCTGGCCTGGAGGGAAAAAGCAAAACAAAACTTAGATCCCACGGTATTCCCTCA	1	+	chr14:35316884-35317003
BMPR1A	BA_678916_000540	GTGCCAGGCACTTCATACTTGTGTATTTACACACATTCTGGCCTGGAGGGAAAAAGCAAAACAAAACTTAGATCCCACGGTATTCCCTCATATTCAGCTGAAAATATGTACAGTCCCTTA	1	+	chr14:35316914-35317033
BMPR1A	BA_678916_000541	ACACATTCTGGCCTGGAGGGAAAAAGCAAAACAAAACTTAGATCCCACGGTATTCCCTCATATTCAGCTGAAAATATGTACAGTCCCTTATATTCTAGTTTTAACTAACTGTCCTTCGTG	1	+	chr14:35316944-35317063
BMPR1A	BA_678916_000542	ACAAAACTTAGATCCCACGGTATTCCCTCATATTCAGCTGAAAATATGTACAGTCCCTTATATTCTAGTTTTAACTAACTGTCCTTCGTGCCCCCTTTCTCCTCCGTCAGCTTTTGCCTT	1	+	chr14:35316974-35317093
BMPR1A	BA_678916_000543	TATTCAGCTGAAAATATGTACAGTCCCTTATATTCTAGTTTTAACTAACTGTCCTTCGTGCCCCCTTTCTCCTCCGTCAGCTTTTGCCTTTAGGGCCATCAGTGCCTCCATTGTCTTTTG	1	+	chr14:35317004-35317123
BMPR1A	BA_678916_000544	TATTCTAGTTTTAACTAACTGTCCTTCGTGCCCCCTTTCTCCTCCGTCAGCTTTTGCCTTTAGGGCCATCAGTGCCTCCATTGTCTTTTGTTACATTTGAGTCACATTCTCTCGTCTTTT	1	+	chr14:35317034-35317153
BMPR1A	BA_678916_000545	CCCCCTTTCTCCTCCGTCAGCTTTTGCCTTTAGGGCCATCAGTGCCTCCATTGTCTTTTGTTACATTTGAGTCACATTCTCTCGTCTTTTTTCTGAGCTGTCTGGGTCTTGAGTCATTGC	1	+	chr14:35317064-35317183
BMPR1A	BA_678916_000546	TAGGGCCATCAGTGCCTCCATTGTCTTTTGTTACATTTGAGTCACATTCTCTCGTCTTTTTTCTGAGCTGTCTGGGTCTTGAGTCATTGCAATATTCTCACTGCACTGAAGGAATAGTGT	1	+	chr14:35317094-35317213
BMPR1A	BA_678916_000547	TTACATTTGAGTCACATTCTCTCGTCTTTTTTCTGAGCTGTCTGGGTCTTGAGTCATTGCAATATTCTCACTGCACTGAAGGAATAGTGTGATATCAGAGAGGTTTCTTGCATCCACTAA	1	+	chr14:35317124-35317243
BMPR1B	BA_593036_007660	CAATGTTTGGTAGCTCAATGGTTCAATTCATAGCCCTCTTTGCAATCTGTATTCATCAAGACAAAACCATTAGTAAATGAAGCTTATTTTATACAATGTTATTAACAGAAATTCCATCCT	1	+	chr3:141592336-141592455
BMPR1B	BA_593036_007661	ACAAAACCATTAGTAAATGAAGCTTATTTTATACAATGTTATTAACAGAAATTCCATCCTAAGAAGTTAATGTTCGATGATGACTAATCAGGAAACATCAGTCGGTTTGGCATGTAACCC	1	+	chr3:141592396-141592515
BMPR1B	BA_593036_007662	AAGAAGTTAATGTTCGATGATGACTAATCAGGAAACATCAGTCGGTTTGGCATGTAACCCACACCAGGACTCTTCACAGTTCAGCCTCTATCCATTTCCAACTTCTTAACTTCTGATTCT	1	+	chr3:141592456-141592575
BMPR1B	BA_593036_007663	ACACCAGGACTCTTCACAGTTCAGCCTCTATCCATTTCCAACTTCTTAACTTCTGATTCTTGTATGAACTAATTACCGATGATGAAATTGGCAATTATAAAACTTCTGGTACTATTACAC	1	+	chr3:141592516-141592635
BMPR1B	BA_593036_007664	TGTATGAACTAATTACCGATGATGAAATTGGCAATTATAAAACTTCTGGTACTATTACACATCATTACTCTAAATCATTATAGGTGCTCATTCAATAATTAAATCAATCTTGTGGAAAAT	1	+	chr3:141592576-141592695
BMPR1B	BA_593036_007665	ATCATTACTCTAAATCATTATAGGTGCTCATTCAATAATTAAATCAATCTTGTGGAAAATATAATCATTACCTCCACTTTACAGTAGAGAAAATTGAGATATCAGAGTTAGCTATTTTGA	1	+	chr3:141592636-141592755
BMPR1B	BA_593036_007666	ATAATCATTACCTCCACTTTACAGTAGAGAAAATTGAGATATCAGAGTTAGCTATTTTGAGTAGGCATACCTAGGCTGTGGCAGAGCTAAGATTTGAAACCAGGCATGCTACACACTGGG	1	+	chr3:141592696-141592815
BMPR1B	BA_593036_007667	GTAGGCATACCTAGGCTGTGGCAGAGCTAAGATTTGAAACCAGGCATGCTACACACTGGGTCCTCAATTACTGTGCTAAAATGAGTAGAAGCACAAACACACATGCCCACAGATAGATGC	1	+	chr3:141592756-141592875
BMPR1B	BA_593036_007668	TCCTCAATTACTGTGCTAAAATGAGTAGAAGCACAAACACACATGCCCACAGATAGATGCTTATACACATTCAAATATGCACACTTGGAAAACACACATGCAGAAAGGCACCTCACGGGC	1	+	chr3:141592816-141592935
BMPR1B	BA_593036_007669	TTATACACATTCAAATATGCACACTTGGAAAACACACATGCAGAAAGGCACCTCACGGGCACATGCACACACGTGCAGGCAAGAAAGAACCCTGGACAGGGAAGACTGTCTGACTGGGAG	1	+	chr3:141592876-141592995
BMPR1B	BA_593036_007670	ACATGCACACACGTGCAGGCAAGAAAGAACCCTGGACAGGGAAGACTGTCTGACTGGGAGGGTAGCAATGATCTTCTCTGGGATTCTATCTCCCTGTACATGAGCATTTTTATACATTAA	1	+	chr3:141592936-141593055
BMPR1B	BA_593036_007671	GGTAGCAATGATCTTCTCTGGGATTCTATCTCCCTGTACATGAGCATTTTTATACATTAAGTTCTATTCTGAACATTAGTTTATACTTCATGAATTCTGTCTACATTACAGGGTCTCTGC	1	+	chr3:141592996-141593115
BMPR1B	BA_593036_007672	GTTCTATTCTGAACATTAGTTTATACTTCATGAATTCTGTCTACATTACAGGGTCTCTGCTTTTATTGGCAATATTTGATACCATATTCAGGTAAATATGAAAAGAAAATGAAAAATTAG	1	+	chr3:141593056-141593175
BMPR1B	BA_593036_007673	TTTTATTGGCAATATTTGATACCATATTCAGGTAAATATGAAAAGAAAATGAAAAATTAGCTTTAGGCTGGGAATATTCTTCTTTATAATAGGGAAATAAGAATTCTGCCTCCCAGGCAT	1	+	chr3:141593116-141593235
BMPR1B	BA_593036_007674	CTTTAGGCTGGGAATATTCTTCTTTATAATAGGGAAATAAGAATTCTGCCTCCCAGGCATTATGCTCAGAGCTTTCCAAAATCGTTCTAAACAGTGTGTTTCCTTACAATTTCATGTTCT	1	+	chr3:141593176-141593295
BMPR1B	BA_593036_007675	TATGCTCAGAGCTTTCCAAAATCGTTCTAAACAGTGTGTTTCCTTACAATTTCATGTTCTCCTCTAGGAGATACCAGATTATAACAGCTCCTGTAGAATGAGCTAGCCAACTAGGTAGAT	1	+	chr3:141593236-141593355
BMPR1B	BA_593036_007676	CCTCTAGGAGATACCAGATTATAACAGCTCCTGTAGAATGAGCTAGCCAACTAGGTAGATACATACCTAATATGTCTTTATAGCAATGACTGTTTTGACATATATAATCCAATCATTTTA	1	+	chr3:141593296-141593415
BMPR1B	BA_593036_007677	ACATACCTAATATGTCTTTATAGCAATGACTGTTTTGACATATATAATCCAATCATTTTATTTCAGAGTATTTTTCCTTAAAGCCAAGTCATAAAGTGTTTTAACACACATGAAAACTTG	1	+	chr3:141593356-141593475
BMPR1B	BA_593036_007678	TTTCAGAGTATTTTTCCTTAAAGCCAAGTCATAAAGTGTTTTAACACACATGAAAACTTGGAGATTTTAAAAGTAGTAATCCTGTACACGCCTACTAAAGATGCAAGAAAATTGATATGA	1	+	chr3:141593416-141593535
BMPR1B	BA_593036_007679	GAGATTTTAAAAGTAGTAATCCTGTACACGCCTACTAAAGATGCAAGAAAATTGATATGAGAAACTTTAATCATAGACAGTATAGCTAAATTCGTCCTACAAAGGGCAGTCTAATGAGTA	1	+	chr3:141593476-141593595
BMPR1B	BA_593036_007680	GAAACTTTAATCATAGACAGTATAGCTAAATTCGTCCTACAAAGGGCAGTCTAATGAGTAGTAAAGTTGAACTTCAAATGCATTTCAGTCTCCTTCCCAGTGCCTTTATCTTCTGGTTTA	1	+	chr3:141593536-141593655
BMPR1B	BA_593036_007681	GTAAAGTTGAACTTCAAATGCATTTCAGTCTCCTTCCCAGTGCCTTTATCTTCTGGTTTAATTTTACAAAGCCAGTGTCTCCTTATTTCCAGCATCATAAATCCATCACTTCACTCATTA	1	+	chr3:141593596-141593715
BMPR1B	BA_593036_007682	ATTTTACAAAGCCAGTGTCTCCTTATTTCCAGCATCATAAATCCATCACTTCACTCATTACCACAAGAAATATCTCATATTCATCAAGTTGCCTCCCTTCTACCTTAAAAAATGTAGCTT	1	+	chr3:141593656-141593775
BMPR1B	BA_593036_007683	CCACAAGAAATATCTCATATTCATCAAGTTGCCTCCCTTCTACCTTAAAAAATGTAGCTTATCCACTCTTGAAATTATTACTCTTTTATCTGAACAATTAAACTATTTTACAAATTACTA	1	+	chr3:141593716-141593835
BMPR1B	BA_593036_007684	ATCCACTCTTGAAATTATTACTCTTTTATCTGAACAATTAAACTATTTTACAAATTACTATATTTTAGTCACCTTGATGTAAGCATCAAACCACAGCTTTGAAATGCAGAAAAAACATTT	1	+	chr3:141593776-141593895
BMPR1B	BA_593036_007685	TATTTTAGTCACCTTGATGTAAGCATCAAACCACAGCTTTGAAATGCAGAAAAAACATTTCACCCATTCACAAACTCTTAACTACTGAAATTGTAAAGTCACACATTTGCTTAATGTATC	1	+	chr3:141593836-141593955
BMPR1B	BA_593036_007686	CACCCATTCACAAACTCTTAACTACTGAAATTGTAAAGTCACACATTTGCTTAATGTATCCACACAAAAGTCACCCTGGCCAACAAAGATAACTAACAAACGTTACAGATTCTAATAGGA	1	+	chr3:141593896-141594015
BMPR1B	BA_593036_007687	CACACAAAAGTCACCCTGGCCAACAAAGATAACTAACAAACGTTACAGATTCTAATAGGATTCAAAGTATATTGGTCAAAACAAAGTTTATGAACTTTGTTAAGATCTTGACTTCTTTAC	1	+	chr3:141593956-141594075
BMPR1B	BA_593036_007688	TTCAAAGTATATTGGTCAAAACAAAGTTTATGAACTTTGTTAAGATCTTGACTTCTTTACATAACAGACTTTCATTTTGCTGAGATTTAAAGTTTCAAACGGGACTGAAATTAACTCTTG	1	+	chr3:141594016-141594135
BMPR1B	BA_593036_007689	ATAACAGACTTTCATTTTGCTGAGATTTAAAGTTTCAAACGGGACTGAAATTAACTCTTGATAGGAAAAAAAAAACGGAGAAATTTTAAATCACTTTACAATTCTCATAAATTACCTAGA	1	+	chr3:141594076-141594195
BMPR1B	BA_593036_007690	ATAGGAAAAAAAAAACGGAGAAATTTTAAATCACTTTACAATTCTCATAAATTACCTAGAGTTGTGCCACAGAGAGAAAGCAGAAAAATACCCAGAGCAGTTGGAGGATGGAGAAGGGGG	1	+	chr3:141594136-141594255
BMPR1B	BA_593036_007691	GTTGTGCCACAGAGAGAAAGCAGAAAAATACCCAGAGCAGTTGGAGGATGGAGAAGGGGGTAGGAAGTTTTAGCCACTTAACTTCTGCCCTTCCGTGTGATAAAAGCCCCGGAATCTCAC	1	+	chr3:141594196-141594315
BMPR1B	BA_593036_007692	TAGGAAGTTTTAGCCACTTAACTTCTGCCCTTCCGTGTGATAAAAGCCCCGGAATCTCACATGAACTCGGCCCCTATCAGCACCGTGGTGTGTGCCACAGATCTTACCCTCCTGTGTAAA	1	+	chr3:141594256-141594375
BMPR1B	BA_593036_007693	ATGAACTCGGCCCCTATCAGCACCGTGGTGTGTGCCACAGATCTTACCCTCCTGTGTAAAAGCAGAAGAATGCTCAAGGAACTGAGAAGCTGAGCCTCTGGTTCCGGGAGCCAGCCCACT	1	+	chr3:141594316-141594435
BMPR1B	BA_593036_007694	AGCAGAAGAATGCTCAAGGAACTGAGAAGCTGAGCCTCTGGTTCCGGGAGCCAGCCCACTGCAGGAGAGCAGCCGCTGTGACCAGCTGGCTTTGCCTGCAGCTTCTTGCCTGGCCTCCTC	1	+	chr3:141594376-141594495
BMPR1B	BA_593036_007695	GCAGGAGAGCAGCCGCTGTGACCAGCTGGCTTTGCCTGCAGCTTCTTGCCTGGCCTCCTCTACAGAAGCTAGGATTTCCCTGCGAGCCTGAGAGGAGACCCAGAGACAAGGCTATTTACA	1	+	chr3:141594436-141594555
BMPR1B	BA_593036_007696	TACAGAAGCTAGGATTTCCCTGCGAGCCTGAGAGGAGACCCAGAGACAAGGCTATTTACACACTGGTTTTGTCATCACGGTCTTTCAGCATCACCTCCTGGAGAGGGCAACAAAGGCAGA	1	+	chr3:141594496-141594615
BMPR1B	BA_593036_007697	CACTGGTTTTGTCATCACGGTCTTTCAGCATCACCTCCTGGAGAGGGCAACAAAGGCAGAAAGGACCCCTCCCGATTGTTTTCTAAAGAAAGGAGTTTGACCTAGACGCCCACACAGGGC	1	+	chr3:141594556-141594675
BMPR1B	BA_593036_007698	AAGGACCCCTCCCGATTGTTTTCTAAAGAAAGGAGTTTGACCTAGACGCCCACACAGGGCCAGTGTACCATAGGCTCCACCCTGCCTCCGCAGCACCCAAGTCTCCTGTCTCCCAGCAGC	1	+	chr3:141594616-141594735
BMPR1B	BA_593036_007699	CAGTGTACCATAGGCTCCACCCTGCCTCCGCAGCACCCAAGTCTCCTGTCTCCCAGCAGCACAGCCTGAGAGACCATACCAGCGGTTTGCTGTCAGAAAACAGTTTACTTCTCCTGCCAG	1	+	chr3:141594676-141594795
BMPR1B	BA_593036_007700	ACAGCCTGAGAGACCATACCAGCGGTTTGCTGTCAGAAAACAGTTTACTTCTCCTGCCAGACTTTTTTTTTTTTTTTTTTTGCCTAAGAATTGAATTGTCACTTTTGGGAAAAAAAAAAA	1	+	chr3:141594736-141594855
BMPR1B	BA_593036_007701	CAAGAACAAGGAGAACTAACGGTGTTCTTGTCTTGGATGAAATCACAAAGATCATTGAACACATCCAAGATTCACTTTCCCTGGGCATTCTCACACTGCATCAACATTTAAATAACAGAG	1	+	chr3:141594872-141594991
BMPR1B	BA_593036_007702	ACATCCAAGATTCACTTTCCCTGGGCATTCTCACACTGCATCAACATTTAAATAACAGAGCAAATCACCAGCTCCAACCCACAGATAGGTTGGAGTCCCATACTGAAAATATTTTGCCAA	1	+	chr3:141594932-141595051
BMPR1B	BA_593036_007703	CAAATCACCAGCTCCAACCCACAGATAGGTTGGAGTCCCATACTGAAAATATTTTGCCAATGCTGAAAGACACCACACTCTAGACTCCCTACCTAATTGTCAATTTTTTTCTAAATAACT	1	+	chr3:141594992-141595111
BMPR1B	BA_593036_007704	TGCTGAAAGACACCACACTCTAGACTCCCTACCTAATTGTCAATTTTTTTCTAAATAACTATAGTTTCATTGCCTGTACAGAAAATAAAAAAATGCTTTCAATATTACCAAGCTTACATA	1	+	chr3:141595052-141595171
BMPR1B	BA_593036_007705	ATAGTTTCATTGCCTGTACAGAAAATAAAAAAATGCTTTCAATATTACCAAGCTTACATACAAAAAAAATCTGTTAAATCTTTCATTTTAACTGCAGAACATTATACTTTATAAATATTC	1	+	chr3:141595112-141595231
BMPR1B	BA_593036_007706	CAAAAAAAATCTGTTAAATCTTTCATTTTAACTGCAGAACATTATACTTTATAAATATTCATTTTTCCAGGAGACTGAACAAACTCTTCCCACAGAGCAGTTCTTTGAAAAAACTGAGAC	1	+	chr3:141595172-141595291
BMPR1B	BA_593036_007707	ATTTTTCCAGGAGACTGAACAAACTCTTCCCACAGAGCAGTTCTTTGAAAAAACTGAGACCCATGTTTTCTTTTATTCTGAGATTACCAAGCTGTATAAAGGAATTGTCAGTGCCTAGGG	1	+	chr3:141595232-141595351
BMPR1B	BA_593036_007708	CCATGTTTTCTTTTATTCTGAGATTACCAAGCTGTATAAAGGAATTGTCAGTGCCTAGGGAGACTACAGTGTTAGTTTAGGTAGGTATAGCAGAGTGCTTCCTAAACTTCATCACTTTAC	1	+	chr3:141595292-141595411
BMPR1B	BA_593036_007709	TTCTTAAAACATAAGTGCCCCGTTGACATAGACCATTTCTCTTAACTTCCCTCAAAACAATAATTAGAGAAGTTGTGACCAAGAGCCCCAAAAATATGCATATGAAAAGCAAAGACTTAG	1	+	chr3:141831166-141831285
BMPR1B	BA_593036_007710	TAATTAGAGAAGTTGTGACCAAGAGCCCCAAAAATATGCATATGAAAAGCAAAGACTTAGTCTCAGTGAGGACAGCAAGAGGCTCTCACACCGAGGGCTTTTTCATATTATTTTTCAAAT	1	+	chr3:141831226-141831345
BMPR1B	BA_593036_007711	TCTCAGTGAGGACAGCAAGAGGCTCTCACACCGAGGGCTTTTTCATATTATTTTTCAAATGTTCTTCAGCTGAACTCCATCGTGAGGACTCATGGAGCCTTTTGTTTTTCCAGAATCCAG	1	+	chr3:141831286-141831405
BMPR1B	BA_593036_007712	GTTCTTCAGCTGAACTCCATCGTGAGGACTCATGGAGCCTTTTGTTTTTCCAGAATCCAGGAGCCTTCTCTCAGGTGGTTCCGCTTCACTGCGGATATGTCTGGGACCTTCTGTTACTCA	1	+	chr3:141831346-141831465
BMPR1B	BA_593036_007713	GAGCCTTCTCTCAGGTGGTTCCGCTTCACTGCGGATATGTCTGGGACCTTCTGTTACTCAGCTGCCTTCTTCTGTTCTGTTTCACTGGCACCTTTGTGGCCCCTCACAGTAACTGACCTC	1	+	chr3:141831406-141831525
BMPR1B	BA_593036_007714	GCTGCCTTCTTCTGTTCTGTTTCACTGGCACCTTTGTGGCCCCTCACAGTAACTGACCTCACCTTGGGGGAAGGTGACTAAGAAAAGAGCAGTCCCTAATAACTCAAAGAAGCCACAAGG	1	+	chr3:141831466-141831585
BMPR1B	BA_593036_007715	ACCTTGGGGGAAGGTGACTAAGAAAAGAGCAGTCCCTAATAACTCAAAGAAGCCACAAGGTCCCCATTCAGAACACAGAGCACTCAGCCTCCTTGGAGAGGCTCAGAGAAACTAGATACC	1	+	chr3:141831526-141831645
BMPR1B	BA_593036_007716	TCCCCATTCAGAACACAGAGCACTCAGCCTCCTTGGAGAGGCTCAGAGAAACTAGATACCTGCCGCCCTGCACAACTTCCGGAGGGTCTTTCTCCAATGTCAGAAAAACCTCACCCTGCA	1	+	chr3:141831586-141831705
BMPR1B	BA_593036_007717	TGCCGCCCTGCACAACTTCCGGAGGGTCTTTCTCCAATGTCAGAAAAACCTCACCCTGCAGAGAACCGATGGGAATAGTGTAGAGGGACAGGAGGAAAGGACAAGAGGTGGGGAAAGTCA	1	+	chr3:141831646-141831765
BMPR1B	BA_593036_007718	GAGAACCGATGGGAATAGTGTAGAGGGACAGGAGGAAAGGACAAGAGGTGGGGAAAGTCAGCTACTAAGTATGGGATCACGTTGGAAAGACTCGGAAGAGGAGAGGGCTGAGAGGATGGA	1	+	chr3:141831706-141831825
BMPR1B	BA_593036_007719	GCTACTAAGTATGGGATCACGTTGGAAAGACTCGGAAGAGGAGAGGGCTGAGAGGATGGAGTGACTAAGGGGCAGGGGAGAGCGCGAGAGGACCGAAGAGTGTGGTTGTCCCATGAGCGC	1	+	chr3:141831766-141831885
BMPR1B	BA_593036_007720	GTGACTAAGGGGCAGGGGAGAGCGCGAGAGGACCGAAGAGTGTGGTTGTCCCATGAGCGCCTTGGCTCTCCCAGCGGGTCCGAGGAGCAGGCGAGGCAGGTGGCTGGTCCCGAGCTCGGT	2	+	chr3:141831826-141831945
BMPR1B	BA_593036_007721	CTTGGCTCTCCCAGCGGGTCCGAGGAGCAGGCGAGGCAGGTGGCTGGTCCCGAGCTCGGTGCCCCTTGGCGTCCCCCCAAGCGCTCGTGGCCCGGGAGCGCCCCGCTGTCCGGGTGTCCC	2	+	chr3:141831886-141832005
BMPR1B	BA_593036_007722	GCCCCTTGGCGTCCCCCCAAGCGCTCGTGGCCCGGGAGCGCCCCGCTGTCCGGGTGTCCCGCTCCCCGAGGAGCACGTGTCCCACCCCGATCGCCGCACAAAGCGCGGGCTACCCTGGAG	2	+	chr3:141831946-141832065
BMPR1B	BA_593036_007723	GCTCCCCGAGGAGCACGTGTCCCACCCCGATCGCCGCACAAAGCGCGGGCTACCCTGGAGACCCCCGATCCGAACTCCCAGGCCCCTTCCCAGCGCCCCTTACCCGCCGCCGCTTCCCAG	2	+	chr3:141832006-141832125
BMPR1B	BA_593036_007724	ACCCCCGATCCGAACTCCCAGGCCCCTTCCCAGCGCCCCTTACCCGCCGCCGCTTCCCAGGTCCCGGGTCCTCCGCGCCCTCACTACGAGCACCACGCCGGCAACTTCTGCCGCCGCCGC	2	+	chr3:141832066-141832185
BMPR1B	BA_593036_007725	GCCTCTGCCGCCGCCGCCGTAGCTCCTGTCCCTCCTCCCGCTCCGCCGCCGCTGGAATTTTTCTCACTCGCCCTCTCCAGCTCCCACTAGTGACTGCAGACTGCGAGCCAAGCACTTAGC	2	+	chr3:141832187-141832306
BMPR1B	BA_593036_007726	TTCTCACTCGCCCTCTCCAGCTCCCACTAGTGACTGCAGACTGCGAGCCAAGCACTTAGCGCAGGGATTACGCGGCCCGGCGCCTGGAGCGGTCCCAGCCACCTCCAGAGCCGTCCTCAG	2	+	chr3:141832247-141832366
BMPR1B	BA_593036_007727	GCAGGGATTACGCGGCCCGGCGCCTGGAGCGGTCCCAGCCACCTCCAGAGCCGTCCTCAGAGCATCCCTGGCGCTGCAGCCGGACAAACGTCCCTGGCTGGTCCAAAAGCCTTGCCACAC	2	+	chr3:141832307-141832426
BMPR1B	BA_593036_007728	AGCATCCCTGGCGCTGCAGCCGGACAAACGTCCCTGGCTGGTCCAAAAGCCTTGCCACACGCCCCCTTCAGCTTCCAGAAACAAAAGCGCGAGGAGGCAGCGCGGAATGGTGCGAGCTGG	1	+	chr3:141832367-141832486
BMPR1B	BA_593036_007729	GCCCCCTTCAGCTTCCAGAAACAAAAGCGCGAGGAGGCAGCGCGGAATGGTGCGAGCTGGGACCGACTCCAAATGGCAGAGCGCGGTGAACTTCAACTTCTCCGGGGCCAGCGACACTTT	1	+	chr3:141832427-141832546
BMPR1B	BA_593036_007730	GACCGACTCCAAATGGCAGAGCGCGGTGAACTTCAACTTCTCCGGGGCCAGCGACACTTTGGAGAAGTTATGGAAACGTTGGTCACACACCTCATAAAAAAGGGGAGGGGAGTGCACATC	1	+	chr3:141832487-141832606
BMPR1B	BA_593036_007731	GGAGAAGTTATGGAAACGTTGGTCACACACCTCATAAAAAAGGGGAGGGGAGTGCACATCAAATTAGATCCACAGTCTCGGGTGAGGGGTTAGAAATCTTGAGGCATGGAGTGAGGCTTC	1	+	chr3:141832547-141832666
BMPR1B	BA_593036_007732	AAATTAGATCCACAGTCTCGGGTGAGGGGTTAGAAATCTTGAGGCATGGAGTGAGGCTTCCTAGGAAAATGAAATTTTTCCTTAATACAGATATTTTGAAATTGTAAACAATGAAAGGCA	1	+	chr3:141832607-141832726
BMPR1B	BA_593036_007733	CTAGGAAAATGAAATTTTTCCTTAATACAGATATTTTGAAATTGTAAACAATGAAAGGCAACGCAAAAAATTCCACTTGTGTTCGATGAAATTTTACAGTTTGGCTTGAGAAAGCATTTG	1	+	chr3:141832667-141832786
BMPR1B	BA_593036_007734	ACGCAAAAAATTCCACTTGTGTTCGATGAAATTTTACAGTTTGGCTTGAGAAAGCATTTGACATCTTTACTCTGTGGTCTCCTGGCTAAGTCTGTAAGTGTTTCGACTCTTGGAGAAATG	1	+	chr3:141832727-141832846
BMPR1B	BA_593036_007735	ACATCTTTACTCTGTGGTCTCCTGGCTAAGTCTGTAAGTGTTTCGACTCTTGGAGAAATGAATATAAAGTAAGGTGATTCGGCTTCTCCGGAGATTTGGGGAGCATAGCTAACCTCTTTC	1	+	chr3:141832787-141832906
BMPR1B	BA_593036_007736	AATATAAAGTAAGGTGATTCGGCTTCTCCGGAGATTTGGGGAGCATAGCTAACCTCTTTCAACTCAGCCATTTTGCCAACTGTTTCCCAGGGCGGTATCTCATGAATTCCAAATATCTTT	1	+	chr3:141832847-141832966
BMPR1B	BA_593036_007737	AACTCAGCCATTTTGCCAACTGTTTCCCAGGGCGGTATCTCATGAATTCCAAATATCTTTTCTTCCTAATGCCTGATGCCCAGTTTCCACCATAATTCATTTCCTCACTTTTTTTTAAAT	1	+	chr3:141832907-141833026
BMPR1B	BA_593036_007738	TCTTCCTAATGCCTGATGCCCAGTTTCCACCATAATTCATTTCCTCACTTTTTTTTAAATTCCAAGCATGTTGAGCAGCCCCGTTTGTCCTCGTTAGAAGTGTGACTTAAGTTTTATTTT	1	+	chr3:141832967-141833086
BMPR1B	BA_593036_007739	TCCAAGCATGTTGAGCAGCCCCGTTTGTCCTCGTTAGAAGTGTGACTTAAGTTTTATTTTGTGCCACTCGGAAGTGAATTTCTTATGAGTTTCTCATTATGATCTATTTCATTCCTACCA	1	+	chr3:141833027-141833146
BMPR1B	BA_593036_007740	GTGCCACTCGGAAGTGAATTTCTTATGAGTTTCTCATTATGATCTATTTCATTCCTACCATTTTATTTCATCCCCTTTCTTCTGAAATTGTTCCAGCTGAATCAGACGTTAAATAAAATA	1	+	chr3:141833087-141833206
BMPR1B	BA_593036_007741	TTTTATTTCATCCCCTTTCTTCTGAAATTGTTCCAGCTGAATCAGACGTTAAATAAAATATTTTCACCTGTAAATATAAGAGACCTACAGGTCCCTCTTAGGAGCAAGTGGGGTCCCTGG	1	+	chr3:141833147-141833266
BMPR1B	BA_593036_007742	TTTTCACCTGTAAATATAAGAGACCTACAGGTCCCTCTTAGGAGCAAGTGGGGTCCCTGGTGTTTATTAATGAGTTGGTAAATGGTGGGTATATTTATCCTGAAATGACAGTGTCGCCAA	1	+	chr3:141833207-141833326
BMPR1B	BA_593036_007743	TGTTTATTAATGAGTTGGTAAATGGTGGGTATATTTATCCTGAAATGACAGTGTCGCCAAGGGAGTCTGCCTGCCCCATCGTGTATCCATGTTATAGTCCCTGAAGCCAGACTGTAAGAC	1	+	chr3:141833267-141833386
BMPR1B	BA_593036_007744	GGGAGTCTGCCTGCCCCATCGTGTATCCATGTTATAGTCCCTGAAGCCAGACTGTAAGACGTTGTCTAGAAGTTTTCTAAGTAGGTAAATTGCTTGTTGGTGTCTCTTTATTGGGCCCTT	1	+	chr3:141833327-141833446
BMPR1B	BA_593036_007745	GTTGTCTAGAAGTTTTCTAAGTAGGTAAATTGCTTGTTGGTGTCTCTTTATTGGGCCCTTGCTGACCCCAGGTGTCAGGACTTAGAGCTGAAAGAACTGCAAAGGTGGAATCCAACCTGT	1	+	chr3:141833387-141833506
BMPR1B	BA_593036_007746	GCTGACCCCAGGTGTCAGGACTTAGAGCTGAAAGAACTGCAAAGGTGGAATCCAACCTGTTGCCTTCACTCTGTGAGTCAGAGATAACCCCACCCCCTCCCCTTCTGCATCGTCTTTCTC	1	+	chr3:141833447-141833566
BMPR1B	BA_593036_007747	TGCCTTCACTCTGTGAGTCAGAGATAACCCCACCCCCTCCCCTTCTGCATCGTCTTTCTCTTCTTTCCTAACTATAAGTATGTGACCAGTGAACTTGCCTTCTATCTGTCCCCCAATCAG	1	+	chr3:141833507-141833626
BMPR1B	BA_593036_007748	TTCTTTCCTAACTATAAGTATGTGACCAGTGAACTTGCCTTCTATCTGTCCCCCAATCAGACTTTCTGTCATTTTCGTCTCCTGACATTAGTTTTAAATAGGAAAGAAACTTGAATAGAT	1	+	chr3:141833567-141833686
BMPR1B	BA_593036_007749	ACTTTCTGTCATTTTCGTCTCCTGACATTAGTTTTAAATAGGAAAGAAACTTGAATAGATCTACCCCTGTGATGTAGGAATTACTAATAACATTTACTAGACAGAAGTGTAAGATTCTCC	1	+	chr3:141833627-141833746
BMPR1B	BA_593036_007750	CTACCCCTGTGATGTAGGAATTACTAATAACATTTACTAGACAGAAGTGTAAGATTCTCCCTTAGAGGTTCTTATAAACTGAATTTAAATAAATTGGATGTTACAGAGAAAGGTACTTGA	1	+	chr3:141833687-141833806
BMPR1B	BA_593036_007751	CTTAGAGGTTCTTATAAACTGAATTTAAATAAATTGGATGTTACAGAGAAAGGTACTTGAAACCCTCTGTAGGTCATGGGGGAGAGGGGCACAGAGTCTTTTAAAAAAAAAAATCTCTGG	1	+	chr3:141833747-141833866
BMPR1B	BA_593036_007752	AACCCTCTGTAGGTCATGGGGGAGAGGGGCACAGAGTCTTTTAAAAAAAAAAATCTCTGGGTAGAAGAAAAGGATGAGAGGGCTCTATAAACCATATTTAAGGAGGATCTTAGGATATGG	1	+	chr3:141833807-141833926
BMPR1B	BA_593036_007753	GTAGAAGAAAAGGATGAGAGGGCTCTATAAACCATATTTAAGGAGGATCTTAGGATATGGCACTCTGCAGCAACAGAGTGTTCACAAAGCTAGCCATACAGTAATCAGCACCAAATAACC	1	+	chr3:141833867-141833986
BMPR1B	BA_593036_007754	CACTCTGCAGCAACAGAGTGTTCACAAAGCTAGCCATACAGTAATCAGCACCAAATAACCATTGCAAGCCAGGCACCGGTATTTGACATTTAATGGCATCTGTCCTTCTTTAAACTCCTA	1	+	chr3:141833927-141834046
BMPR1B	BA_593036_007755	ATTGCAAGCCAGGCACCGGTATTTGACATTTAATGGCATCTGTCCTTCTTTAAACTCCTAATACAGAAAGATAAGCTATTGTAGACATAGACAATAAGAAAGATGCCGTTTAGTGAATGA	1	+	chr3:141833987-141834106
BMPR1B	BA_593036_007756	ATACAGAAAGATAAGCTATTGTAGACATAGACAATAAGAAAGATGCCGTTTAGTGAATGAACACACAGCTCTAAGTGCAGACTCTCAGGGTGTGGCATAAACACGTGTGGTGTGTGTGCG	1	+	chr3:141834047-141834166
BMPR1B	BA_593036_007757	ACACACAGCTCTAAGTGCAGACTCTCAGGGTGTGGCATAAACACGTGTGGTGTGTGTGCGCGCGAGGAACAGGGACAACCTTGGCTAGGCTAATGAGATAGGATTTCTCTCTTTAGATGA	1	+	chr3:141834107-141834226
BMPR1B	BA_593036_007758	CGCGAGGAACAGGGACAACCTTGGCTAGGCTAATGAGATAGGATTTCTCTCTTTAGATGAAGATGCAGAATGGGAGGATTGTTAAACCATAAGGTGACAGAGGATTTTTCAGACGACTAT	1	+	chr3:141834167-141834286
BMPR1B	BA_593036_007759	AGATGCAGAATGGGAGGATTGTTAAACCATAAGGTGACAGAGGATTTTTCAGACGACTATTTAAAGGTACCTAGAGAGGGAGAAACATACAGGCGCAATTGATCAAAAGAGTTGTATAAA	1	+	chr3:141834227-141834346
BMPR2	BA_593036_012385	TTCGCGGTCTTCATGACTGAGGCAGGAGGCTTTTGTTTGGGCCGCGACGGGAGGGGGACCCGACGAGGCCCGGGTCTCGGCTCCTGGGAAAGGCGGCTCGGTCGGGATTCTCAGGGAAAC	2	+	chr1:59819796-59819915
BMPR2	BA_593036_012386	CGACGAGGCCCGGGTCTCGGCTCCTGGGAAAGGCGGCTCGGTCGGGATTCTCAGGGAAACCGAGGAGGATGCGCCCGCCGCCACCAACAACGACGGCGTGCCTTCGAGGCTTCTCGCCCA	2	+	chr1:59819856-59819975
BMPR2	BA_593036_012387	CGAGGAGGATGCGCCCGCCGCCACCAACAACGACGGCGTGCCTTCGAGGCTTCTCGCCCACCTTCCCGGGTAGCCTTTAACCTACGTTAAACAAAAGATTGTGGCCGCCCTCCCTTACAC	1	+	chr1:59819916-59820035
BMPR2	BA_593036_012388	CCTTCCCGGGTAGCCTTTAACCTACGTTAAACAAAAGATTGTGGCCGCCCTCCCTTACACGCTTGAACAGATCGCACGGCGTCCACGTGCGGAGCGTTCGCCTGTGTGAGGAAAGGGACC	1	+	chr1:59819976-59820095
BMPR2	BA_593036_012389	GCTTGAACAGATCGCACGGCGTCCACGTGCGGAGCGTTCGCCTGTGTGAGGAAAGGGACCTAGGCTGCCCACCCGCAGCCCACGACAACCCTTCCCTGCACTGGGCGCCCAGGCGAGAGA	2	+	chr1:59820036-59820155
BMPR2	BA_593036_012390	TAGGCTGCCCACCCGCAGCCCACGACAACCCTTCCCTGCACTGGGCGCCCAGGCGAGAGACGCCGCGCGAGGGCCTCACTCTCCAGCAAGCCTGGGAGTGAGGGGCGGGGCCGGGCGGGG	2	+	chr1:59820096-59820215
BMPR2	BA_593036_012391	TCGGCTGGAGAGCCGGAGACTGAGAGGAGGCGGCGGCGGGGGCGGGGCGACTCCGGTGACCGGGAGCGCCTCAGACTGGCAGCTGCGGCGACTCCCCCCTTTGTGTCTGGTCTGCTTGGA	2	+	chr1:59820310-59820429
BMPR2	BA_593036_012392	CGGGAGCGCCTCAGACTGGCAGCTGCGGCGACTCCCCCCTTTGTGTCTGGTCTGCTTGGAACCGCTGGAGGTGCTTCCCGGAGGGGCTCGGGGTGTTTCGCAAGCTCAGCTGCCCACCCC	2	+	chr1:59820370-59820489
BMPR2	BA_593036_012393	ACCGCTGGAGGTGCTTCCCGGAGGGGCTCGGGGTGTTTCGCAAGCTCAGCTGCCCACCCCCTTCCTCGGCCACCTACGTCCGTCTTCCCGCCGCCCCCCGCCCTCGGCCCGCGACGCCCG	2	+	chr1:59820430-59820549
BMPR2	BA_593036_012394	CCATCGACGGGAGGAGACCCGGTTTTCATGGTGGAATTTACTTCAGGCAAGAGCGAGGGGCTGGAGTAGCCGAGAGCGAGGCCGCGGGCGGAGCGCCCTCGAAGGGCCAGCCCCGCACCT	2	+	chr1:59820639-59820758
BMPR2	BA_593036_012395	CTGGAGTAGCCGAGAGCGAGGCCGCGGGCGGAGCGCCCTCGAAGGGCCAGCCCCGCACCTCCCCGCGTGTCGCTCGCCCGGGCTCGCCGCGTCGCCGCGACCCTCCCCTCCCCCGCGCCC	2	+	chr1:59820699-59820818
BMPR2	BA_593036_012396	CCCCGCGTGTCGCTCGCCCGGGCTCGCCGCGTCGCCGCGACCCTCCCCTCCCCCGCGCCCCGAGGCCCGGCCTGAGCGACCCTCGCGCGATTGTTCCGAGGAAGCTGTGGACTCGCCCAT	2	+	chr1:59820759-59820878
BMPR2	BA_593036_012397	CGAGGCCCGGCCTGAGCGACCCTCGCGCGATTGTTCCGAGGAAGCTGTGGACTCGCCCATGGAAGCAGGCACCTTTTTCGACCCAGTCGGTGGGAAGGATTTGTTGATGTCGAAATCCGA	1	+	chr1:59820819-59820938
BMPR2	BA_593036_012398	GGAAGCAGGCACCTTTTTCGACCCAGTCGGTGGGAAGGATTTGTTGATGTCGAAATCCGAGTGAAGGAAGCAACGAAGCGAAACTTTAAAAGGAACCCCACTGTCCTCGGAGTACGGAGC	1	+	chr1:59820879-59820998
BMPR2	BA_593036_012399	GTGAAGGAAGCAACGAAGCGAAACTTTAAAAGGAACCCCACTGTCCTCGGAGTACGGAGCGATGCTACTCCGGCGGCCGGGCGCCGCTGCCTGCCCCGCTTCGCCCTTCCCGGCGGTCGG	2	+	chr1:59820939-59821058
BMPR2	BA_593036_012400	TCCCCCCCCCCCCCCCCCCGGCACTCTGGATATGTTTTCTCCCAGATCTGGGTATTTTTTTGATATCGTGAAACTACGAGGGAAATAATTGCAGGGGTTTCTTCTGGGCTCCCTGCGTCT	1	+	chr1:59821101-59821220
BMPR2	BA_593036_012401	TGATATCGTGAAACTACGAGGGAAATAATTGCAGGGGTTTCTTCTGGGCTCCCTGCGTCTTCCCCATGGACATGCCTTCAATTTGGGGAGCCGAGACACCCCGTCCTAGGCGAATGAAGC	1	+	chr1:59821161-59821280
BMPR2	BA_593036_012402	TCCCCATGGACATGCCTTCAATTTGGGGAGCCGAGACACCCCGTCCTAGGCGAATGAAGCCCCCCAGCCACGAGGGAGCGAAATGAAGGGAAATTCTGCAGTGGAATGAGAGCTCTACTA	1	+	chr1:59821221-59821340
BMPR2	BA_593036_012403	CCCCCAGCCACGAGGGAGCGAAATGAAGGGAAATTCTGCAGTGGAATGAGAGCTCTACTAGCTAGGTCCTCGCATCTGCCATTTGTCCTTTCAAACTGCATTGTAATCCGGGCAGGATAA	1	+	chr1:59821281-59821400
BMPR2	BA_593036_012404	GCTAGGTCCTCGCATCTGCCATTTGTCCTTTCAAACTGCATTGTAATCCGGGCAGGATAAATCAGACGAAGAGCAGCCTCCTAGCCGGATTTCTCCGCCCGAATTTACTTTCCAGATTTC	1	+	chr1:59821341-59821460
BMPR2	BA_593036_012405	ATCAGACGAAGAGCAGCCTCCTAGCCGGATTTCTCCGCCCGAATTTACTTTCCAGATTTCTTTTCTTTGCCCTCCTGCTTCTTTGCTGGCCCAGGGATGACTTCCTCGCTGCATCGGCCC	1	+	chr1:59821401-59821520
BMPR2	BA_593036_012406	TTTTCTTTGCCCTCCTGCTTCTTTGCTGGCCCAGGGATGACTTCCTCGCTGCATCGGCCCTTTCGGGTGCCCTGGCTGCTATGGGCCGTCCTGCTGGTCAGCACTACGGCTGGTGAGTAG	1	+	chr1:59821461-59821580
BMPR2	BA_593036_012407	TTTCGGGTGCCCTGGCTGCTATGGGCCGTCCTGCTGGTCAGCACTACGGCTGGTGAGTAGCCCTAGGTGGTATGTCCCAGCTCCTACTCCAGTGGGTGGCGAGGGAGAGAGCCTGCAGAG	1	+	chr1:59821521-59821640
BMPR2	BA_593036_012408	CCCTAGGTGGTATGTCCCAGCTCCTACTCCAGTGGGTGGCGAGGGAGAGAGCCTGCAGAGGCCGAGCCCTGTGCTCTCCCCTCGCAACGTGTGCTCTCGGATCCGGGTGGAGGAGCCAGC	2	+	chr1:59821581-59821700
BMPR2	BA_593036_012409	GCCGAGCCCTGTGCTCTCCCCTCGCAACGTGTGCTCTCGGATCCGGGTGGAGGAGCCAGCCAGGGAAATCACCTTCGGTGTTTGCGTGTTGTTTCCCGTCCCTACTCCCGTATTCCCTGA	1	+	chr1:59821641-59821760
BMPR2	BA_593036_012410	CAGGGAAATCACCTTCGGTGTTTGCGTGTTGTTTCCCGTCCCTACTCCCGTATTCCCTGACCCCTCCCCCACGGGGGGAAAAAGACATATTGGGTGTGGTATCTTGACATTTTTAGCTGT	1	+	chr1:59821701-59821820
BMPR2	BA_593036_012411	CCCCTCCCCCACGGGGGGAAAAAGACATATTGGGTGTGGTATCTTGACATTTTTAGCTGTGAGGTAATGCAAGGATTAAAAATAATATTTTAATCACTAGTGAACTGTCTATTAGATTTT	1	+	chr1:59821761-59821880
BMPR2	BA_593036_012412	GAGGTAATGCAAGGATTAAAAATAATATTTTAATCACTAGTGAACTGTCTATTAGATTTTTGGAGATAAAGGTGGTTTTTTTACTTTGATGGAAAGAAGCAGATTTGGTTTACAATAAAA	1	+	chr1:59821821-59821940
BMPR2	BA_593036_012413	TGGAGATAAAGGTGGTTTTTTTACTTTGATGGAAAGAAGCAGATTTGGTTTACAATAAAAAGAACAACTAGACACACACTTGATTGAACCTTATTTTTACATTTAGATCACTCTTTGGGA	1	+	chr1:59821881-59822000
BMPR2	BA_593036_012414	AGAACAACTAGACACACACTTGATTGAACCTTATTTTTACATTTAGATCACTCTTTGGGAATCCACATTACTTTTCGTTATTTAAAAATGTTACCTGAAAAAAAATGTTACCTGATGAAT	1	+	chr1:59821941-59822060
BMPR2	BA_593036_012415	ATCCACATTACTTTTCGTTATTTAAAAATGTTACCTGAAAAAAAATGTTACCTGATGAATAGAGTAAACGTTGAGGAAGTCACTGTGTGAGAATCTTGATAACAGTGTATACTAACACAG	1	+	chr1:59822001-59822120
BMPR2	BA_593036_012416	AGAGTAAACGTTGAGGAAGTCACTGTGTGAGAATCTTGATAACAGTGTATACTAACACAGTTGATGTCATCATTAATATTGTTTTGCTCCCAAGAATCTTAACTATTCTCTGTCTCTTTA	1	+	chr1:59822061-59822180
BMPR2	BA_593036_012417	TTGATGTCATCATTAATATTGTTTTGCTCCCAAGAATCTTAACTATTCTCTGTCTCTTTATCCTGGATATTCTTAACTTTGTATCCCTTTGGAATTACTGTTGGGCACAGAAGTGTTTTT	1	+	chr1:59822121-59822240
C330027C09RIK	BA_593036_009222	TAAATTTTATTTGATCACACATCTCTAAAGAATTAAAAGTTTGAGAACACACTGAAAATATAAAAATCAATTAACTTGTTAGTTATATATAGGTATTATGCTTATATAAAATGAATAAGA	1	+	chr16:48991630-48991749
C330027C09RIK	BA_593036_009223	TAAAAATCAATTAACTTGTTAGTTATATATAGGTATTATGCTTATATAAAATGAATAAGAAAAAAACTAAAATTTTAATTTAGACATATCCACTGCTTGCTTAGAAAAAGCTTCTTGCTT	1	+	chr16:48991690-48991809
C330027C09RIK	BA_593036_009224	AAAAAACTAAAATTTTAATTTAGACATATCCACTGCTTGCTTAGAAAAAGCTTCTTGCTTGTTCACAAAACAAGAATCTACTTATTACATAAATTAAACAAGAATTTTTTTTTTTTCGAG	1	+	chr16:48991750-48991869
C330027C09RIK	BA_593036_009225	ACCTTACACTATTCAAAGAAGCAGGCCTTCAAACAGTTATTAAAAATGATTATTATACTCTGACATCTCATGTCTTTATCTAGGAACTGAATTAAAAATGTGTATTAATTGTGTGAAACA	1	+	chr16:48992040-48992159
C330027C09RIK	BA_593036_009226	TGACATCTCATGTCTTTATCTAGGAACTGAATTAAAAATGTGTATTAATTGTGTGAAACAAAAGGTCAAGGCAAGACAGAGGGAAACTATTCAAATTATCAAGACCTCTACTTTTAACAC	1	+	chr16:48992100-48992219
C330027C09RIK	BA_593036_009227	AAAGGTCAAGGCAAGACAGAGGGAAACTATTCAAATTATCAAGACCTCTACTTTTAACACAGTTATGAATTCTGTAAAATGGAAAGAAAAGTCTTAAGTACATTTCAAAAGTGAAAGGTG	1	+	chr16:48992160-48992279
C330027C09RIK	BA_593036_009228	AGTTATGAATTCTGTAAAATGGAAAGAAAAGTCTTAAGTACATTTCAAAAGTGAAAGGTGAATTTTATGGATTGACCAATAACAATTTTATGGACTGACCAATAACGATAGCTAAATTTT	1	+	chr16:48992220-48992339
C330027C09RIK	BA_593036_009229	AATTTTATGGATTGACCAATAACAATTTTATGGACTGACCAATAACGATAGCTAAATTTTAGAACTTGATGGTTGGTAAAGGAAACAGAATAGTCATGTACCTCTTATTAATAGGTATTA	1	+	chr16:48992280-48992399
C330027C09RIK	BA_593036_009230	AGAACTTGATGGTTGGTAAAGGAAACAGAATAGTCATGTACCTCTTATTAATAGGTATTAATTAATAGGTATTCTAGATATGTGTCACTGAGTTATTTCACTGTTGCACAAACATGGTAA	1	+	chr16:48992340-48992459
C330027C09RIK	BA_593036_009231	ATTAATAGGTATTCTAGATATGTGTCACTGAGTTATTTCACTGTTGCACAAACATGGTAAAAGACCACCAATACACATTTATAAGGCATGGCCTAAATATGATAAGAGATTTGGTAAACA	1	+	chr16:48992400-48992519
C330027C09RIK	BA_593036_009232	AAGACCACCAATACACATTTATAAGGCATGGCCTAAATATGATAAGAGATTTGGTAAACAACAGCTGTATGAAGATACTTCTGGTTTTACATGGCATATACTATTAAGCTTGTGTTTTGA	1	+	chr16:48992460-48992579
C330027C09RIK	BA_593036_009233	ACAGCTGTATGAAGATACTTCTGGTTTTACATGGCATATACTATTAAGCTTGTGTTTTGACTATGAATACAAGTGGTAATGATAAAAGTATGGATCAGTAAACAAATGAATCATTAGTAG	1	+	chr16:48992520-48992639
C330027C09RIK	BA_593036_009234	CTATGAATACAAGTGGTAATGATAAAAGTATGGATCAGTAAACAAATGAATCATTAGTAGTTTATTTGTGCCATCCATAACAGTATGTGCTATACTTTCATATGCTGCTGCTGTGTAGTT	1	+	chr16:48992580-48992699
C330027C09RIK	BA_593036_009235	TTTATTTGTGCCATCCATAACAGTATGTGCTATACTTTCATATGCTGCTGCTGTGTAGTTATGACACTGTGGCAAGTAAGATGTCACTAGGTCACAGGAAGAGATCATTCATTCAGCTTT	1	+	chr16:48992640-48992759
C330027C09RIK	BA_593036_009236	ATGACACTGTGGCAAGTAAGATGTCACTAGGTCACAGGAAGAGATCATTCATTCAGCTTTCAGTTTAGTATGATCTAACTGGATCAGCATCACACACGCATCAGTGATCAAAGCATCATT	1	+	chr16:48992700-48992819
C330027C09RIK	BA_593036_009237	CAGTTTAGTATGATCTAACTGGATCAGCATCACACACGCATCAGTGATCAAAGCATCATTTTGGGGATATGCCTGTTATGTCAATGGAAGAGATCATTTTTTTTTTTCTTTCTAGCACTT	1	+	chr16:48992760-48992879
C330027C09RIK	BA_593036_009238	TTGGGGATATGCCTGTTATGTCAATGGAAGAGATCATTTTTTTTTTTCTTTCTAGCACTTTGGCTTTGTAATAAAGGCTACTATTTCTGAAGCTCAATAAGAATTTACTGAATAAACTAT	1	+	chr16:48992820-48992939
C330027C09RIK	BA_593036_009239	TGGCTTTGTAATAAAGGCTACTATTTCTGAAGCTCAATAAGAATTTACTGAATAAACTATCGTGTAAAATAGTCTACTCTTAGGTTTCACTTCATGAAAAGCCTAAAGCAGTAAAATGCA	1	+	chr16:48992880-48992999
C330027C09RIK	BA_593036_009240	CGTGTAAAATAGTCTACTCTTAGGTTTCACTTCATGAAAAGCCTAAAGCAGTAAAATGCAGAGACACAAAGAGAAAGGTGCAAAAATACTTGTCAGCAAACTGGCTGCTCTTCGTTTTAG	1	+	chr16:48992940-48993059
C330027C09RIK	BA_593036_009241	GAGACACAAAGAGAAAGGTGCAAAAATACTTGTCAGCAAACTGGCTGCTCTTCGTTTTAGTGATGACGCATTCCTCGTTTATGTAGTGAATTCCAACAGTACTTTCCTATTTGGACTATT	1	+	chr16:48993000-48993119
C330027C09RIK	BA_593036_009242	TGATGACGCATTCCTCGTTTATGTAGTGAATTCCAACAGTACTTTCCTATTTGGACTATTATTAGATGGTTGCTTCTCCGCAGGCACCACGTCCTCATCTTTGTTCTGAGTGACAGTCAA	1	+	chr16:48993060-48993179
C330027C09RIK	BA_593036_009243	TGAATGCACTAGCTACAAACTCTCATGTGACTATCTCAACGGCACAATCTTTTTCCAGCCATCAGTTAGCTTTACTTTTATTTTCTTTTAATATGAACATAAATGACGTCTTTAAAAGGT	1	+	chr16:48993233-48993352
C330027C09RIK	BA_593036_009244	ATCAGTTAGCTTTACTTTTATTTTCTTTTAATATGAACATAAATGACGTCTTTAAAAGGTACCAATACAAACGAGAAAAAAACAAAAAACAAAAAGGAACGTTCCCTGAATTCCCACAAT	1	+	chr16:48993293-48993412
C330027C09RIK	BA_593036_009245	ACCAATACAAACGAGAAAAAAACAAAAAACAAAAAGGAACGTTCCCTGAATTCCCACAATTTCAGAAGAACTTAGTCAAATGGGCATTTACTCGATCCCACAACCTAGCTTAAGCTCCTG	1	+	chr16:48993353-48993472
C330027C09RIK	BA_593036_009246	TTCAGAAGAACTTAGTCAAATGGGCATTTACTCGATCCCACAACCTAGCTTAAGCTCCTGAACCAGTTGCTGACTCACTTCGTTATTAGATCCGTGCACATCATTACCTCCGATTAAAAT	1	+	chr16:48993413-48993532
C330027C09RIK	BA_593036_009247	TTTTTTTTTTTTTTTTTTTGACGCCACAGAAATGTGCAAAATAATCACGCCAGACAAGAACAGGCCCCTCAGCCTACAGACATCAAAGCTGACAAGAACGCGTCCGGGAGCGACTCCGGG	1	+	chr16:48993579-48993698
C330027C09RIK	BA_593036_009248	CAGGCCCCTCAGCCTACAGACATCAAAGCTGACAAGAACGCGTCCGGGAGCGACTCCGGGATGCTCTCTCTCTATGGGGGGTTCTGACAAATCCTACCGTAAAGTTCCGGCTGCCTCATC	1	+	chr16:48993639-48993758
C330027C09RIK	BA_593036_009249	ATGCTCTCTCTCTATGGGGGGTTCTGACAAATCCTACCGTAAAGTTCCGGCTGCCTCATCACGGAACCCCGACCGCCACAGGTCTTAGCCTGCGCGAGTCGCCTGCGGCCACCAGGGACC	1	+	chr16:48993699-48993818
C330027C09RIK	BA_593036_009250	ACGGAACCCCGACCGCCACAGGTCTTAGCCTGCGCGAGTCGCCTGCGGCCACCAGGGACCAGGGCCGCAGAACCTGAGGCCCCTCTCCCGCCGCCTCCAAACCTACGCCCCCACCCCCAG	2	+	chr16:48993759-48993878
C330027C09RIK	BA_593036_009251	AGGGCCGCAGAACCTGAGGCCCCTCTCCCGCCGCCTCCAAACCTACGCCCCCACCCCCAGCTTCGGCGGCTCCGAGTTCCTCACCGTGTCTAGACTAGGGGGGAGCGGCCGTGTCTCGGG	2	+	chr16:48993819-48993938
C330027C09RIK	BA_593036_009252	CTTCGGCGGCTCCGAGTTCCTCACCGTGTCTAGACTAGGGGGGAGCGGCCGTGTCTCGGGCAGAGGCTGAGGCACGCACGGAAAGCCGAGCCCGCCGCGCCCAGGCCGAGGAAGGCCCGG	2	+	chr16:48993879-48993998
C330027C09RIK	BA_593036_009253	CAGAGGCTGAGGCACGCACGGAAAGCCGAGCCCGCCGCGCCCAGGCCGAGGAAGGCCCGGGGACCGAGCCCGCGCGGCACGGAGACCCCCGTTCGCCCCAGAAGCCCTCCACAGAATGAG	2	+	chr16:48993939-48994058
C330027C09RIK	BA_593036_009254	GGACCGAGCCCGCGCGGCACGGAGACCCCCGTTCGCCCCAGAAGCCCTCCACAGAATGAGCCCGCACGAGCTCGTCTCGCGAGATTCCCGCGTGTTCGCGGACCTCCAGCCGAAACCTCG	2	+	chr16:48993999-48994118
C330027C09RIK	BA_593036_009255	CCCGCACGAGCTCGTCTCGCGAGATTCCCGCGTGTTCGCGGACCTCCAGCCGAAACCTCGCGGCCTCTCCGCCAAAGGGGGACTGCGGCGGGGGTGGGAGGGGATGGCTCCCTGCCACCT	2	+	chr16:48994059-48994178
C330027C09RIK	BA_593036_009256	CGGCCTCTCCGCCAAAGGGGGACTGCGGCGGGGGTGGGAGGGGATGGCTCCCTGCCACCTTCCCGCAACCCCAGCGCCTGGAACCCAGGCCCACCCTGCCAATCACCGACTGCAGTCCCA	2	+	chr16:48994119-48994238
C330027C09RIK	BA_593036_009257	TCCCGCAACCCCAGCGCCTGGAACCCAGGCCCACCCTGCCAATCACCGACTGCAGTCCCACCCGCTGCTCCCAGACTTCCGGAGTCCGACCGGAACAGGAAGCTGCCAGGCGCAAGAGGG	2	+	chr16:48994179-48994298
CAMK2A	BA_593036_013712	ATATACAGAAGGAGTGAACTCATTAGGGCAGATGACCAATGAGTTTAGGAAAGAAGAGTCCAGGGCAGGGTACATCTACACCACCCGCCCAGCCCTGGGTGAGTCCAGCCACGTTCACCT	1	+	chr18:61084265-61084384
CAMK2A	BA_593036_013713	CAGGGCAGGGTACATCTACACCACCCGCCCAGCCCTGGGTGAGTCCAGCCACGTTCACCTCATTATAGTTGCCTCTCTCCAGTCCTACCTTGACGGGAAGCACAAGCAGAAACTGGGACA	1	+	chr18:61084325-61084444
CAMK2A	BA_593036_013714	CATTATAGTTGCCTCTCTCCAGTCCTACCTTGACGGGAAGCACAAGCAGAAACTGGGACAGGAGCCCCAGGAGACCAAATCTTCATGGTCCCTCTGGGAGGATGGGTGGGGAGAGCTGTG	1	+	chr18:61084385-61084504
CAMK2A	BA_593036_013715	GGAGCCCCAGGAGACCAAATCTTCATGGTCCCTCTGGGAGGATGGGTGGGGAGAGCTGTGGCAGAGGCCTCAGGAGGGGCCCTGCTGCTCAGTGGTGACAGATAGGGGTGAGAAAGCAGA	1	+	chr18:61084445-61084564
CAMK2A	BA_593036_013716	GCAGAGGCCTCAGGAGGGGCCCTGCTGCTCAGTGGTGACAGATAGGGGTGAGAAAGCAGACAGAGTCATTCCGTCAGCATTCTGGGTCTGTTTGGTACTTCTTCTCACGATAAGGTGGCG	1	+	chr18:61084505-61084624
CAMK2A	BA_593036_013717	CAGAGTCATTCCGTCAGCATTCTGGGTCTGTTTGGTACTTCTTCTCACGATAAGGTGGCGGTGTGATATGCACAATGGCTAAAAAGCAGGGAGAGCTGGAAAGAAACAAGGACAGAGACA	1	+	chr18:61084565-61084684
CAMK2A	BA_593036_013718	GTGTGATATGCACAATGGCTAAAAAGCAGGGAGAGCTGGAAAGAAACAAGGACAGAGACAGAGGCCAAGTCAACCAGACCAATTCCCAGAGGAAGCAAAGAAACCATTACAGAGACTACA	1	+	chr18:61084625-61084744
CAMK2A	BA_593036_013719	GAGGCCAAGTCAACCAGACCAATTCCCAGAGGAAGCAAAGAAACCATTACAGAGACTACAAGGGGGAAGGGAAGGAGAGATGAATTAGCTTCCCCTGTAAACCTTAGAACCCAGCTGTTG	1	+	chr18:61084685-61084804
CAMK2A	BA_593036_013720	AGGGGGAAGGGAAGGAGAGATGAATTAGCTTCCCCTGTAAACCTTAGAACCCAGCTGTTGCCAGGGCAACGGGGCAATACCTGTCTCTTCAGAGGAGATGAAGTTGCCAGGGTAACTACA	1	+	chr18:61084745-61084864
CAMK2A	BA_593036_013721	CCAGGGCAACGGGGCAATACCTGTCTCTTCAGAGGAGATGAAGTTGCCAGGGTAACTACATCCTGTCTTTCTCAAGGACCATCCCAGAATGTGGCACCCACTAGCCGTTACCATAGCAAC	1	+	chr18:61084805-61084924
CAMK2A	BA_593036_013722	TCCTGTCTTTCTCAAGGACCATCCCAGAATGTGGCACCCACTAGCCGTTACCATAGCAACTGCCTCTTTGCCCCACTTAATCCCATCCCGTCTGTTAAAAGGGCCCTATAGTTGGAGGTG	1	+	chr18:61084865-61084984
CAMK2A	BA_593036_013723	TGCCTCTTTGCCCCACTTAATCCCATCCCGTCTGTTAAAAGGGCCCTATAGTTGGAGGTGGGGGAGGTAGGAAGAGCGATGATCACTTGTGGACTAAGTTTGTTCGCATCCCCTTCTCCA	1	+	chr18:61084925-61085044
CAMK2A	BA_593036_013724	GGGGAGGTAGGAAGAGCGATGATCACTTGTGGACTAAGTTTGTTCGCATCCCCTTCTCCAACCCCCTCAGTACATCACCCTGGGGGAACAGGGTCCACTTGCTCCTGGGCCCACACAGTC	1	+	chr18:61084985-61085104
CAMK2A	BA_593036_013725	ACCCCCTCAGTACATCACCCTGGGGGAACAGGGTCCACTTGCTCCTGGGCCCACACAGTCCTGCAGTATTGTGTATATAAGGCCAGGGCAAAGAGGAGCAGGTTTTAAAGTGAAAGGCAG	1	+	chr18:61085045-61085164
CAMK2A	BA_593036_013726	CTGCAGTATTGTGTATATAAGGCCAGGGCAAAGAGGAGCAGGTTTTAAAGTGAAAGGCAGGCAGGTGTTGGGGAGGCAGTTACCGGGGCAACGGGAACAGGGCGTTTCGGAGGTGGTTGC	1	+	chr18:61085105-61085224
CAMK2A	BA_593036_013727	GCAGGTGTTGGGGAGGCAGTTACCGGGGCAACGGGAACAGGGCGTTTCGGAGGTGGTTGCCATGGGGACCTGGATGCTGACGAAGGCTCGCGAGGCTGTGAGCAGCCACAGTGCCCTGCT	2	+	chr18:61085165-61085284
CAMK2A	BA_593036_013728	CATGGGGACCTGGATGCTGACGAAGGCTCGCGAGGCTGTGAGCAGCCACAGTGCCCTGCTCAGAAGCCCCAAGCTCGTCAGTCAAGCCGGTTCTCCGTTTGCACTCAGGAGCACGGGCAG	1	+	chr18:61085225-61085344
CAMK2A	BA_593036_013729	CAGAAGCCCCAAGCTCGTCAGTCAAGCCGGTTCTCCGTTTGCACTCAGGAGCACGGGCAGGCGAGTGGCCCCTAGTTCTGGGGGCAGCGCTTCAGCATCCCAGCCCTAGTTCCCAGCCTA	1	+	chr18:61085285-61085404
CAMK2A	BA_593036_013730	GCGAGTGGCCCCTAGTTCTGGGGGCAGCGCTTCAGCATCCCAGCCCTAGTTCCCAGCCTAAAGCCTCGCCTGCCTGCCCAGTGCCAGGATGGCTACCATCACCTGCACCCGATTCACAGA	1	+	chr18:61085345-61085464
CAMK2A	BA_593036_013731	AAGCCTCGCCTGCCTGCCCAGTGCCAGGATGGCTACCATCACCTGCACCCGATTCACAGAAGAGTACCAGCTCTTTGAGGAACTGGGAAAGTGAGTCACACCTCAGGGAGTCCTAGAGAG	1	+	chr18:61085405-61085524
CAMK2A	BA_593036_013732	AGAGTACCAGCTCTTTGAGGAACTGGGAAAGTGAGTCACACCTCAGGGAGTCCTAGAGAGCATGGGGATCAGTCTCCTTGGGCAGGGGGAGGGGGCGTGTGCCTATGTGGCCAGAGCTGT	1	+	chr18:61085465-61085584
CAMK2A	BA_593036_013733	CATGGGGATCAGTCTCCTTGGGCAGGGGGAGGGGGCGTGTGCCTATGTGGCCAGAGCTGTCCCGTGCATGCAGAGGGAGGTGTGCAGCATGATTTGGAAGCACTGTGTATGCATAGGGTG	1	+	chr18:61085525-61085644
CAMK2A	BA_593036_013734	CCCGTGCATGCAGAGGGAGGTGTGCAGCATGATTTGGAAGCACTGTGTATGCATAGGGTGTCCAGAGTTAGGCGCTGACACATTTATGAGTCCAGTCAGCCTGGTGTGTGTGTGTGTGTG	1	+	chr18:61085585-61085704
CAMK2A	BA_593036_013735	GTGTGTGTGTGTGTGATGGAAAGGAAACAGATTGGTGGTGTATGCACACACCTATGCATATAAATACACATGACCTGGGTTCACAAAGATATCTAGAAACTTGGGGTTTGAAAGGGATTT	1	+	chr18:61085700-61085819
CAMK2A	BA_593036_013736	TAAATACACATGACCTGGGTTCACAAAGATATCTAGAAACTTGGGGTTTGAAAGGGATTTTCCCACTTGGCTGGATCTGAGCTGGAATCTATTTTTGTAGTTGTACTTAGAAACCTCCAA	1	+	chr18:61085760-61085879
CAMK2A	BA_593036_013737	TCCCACTTGGCTGGATCTGAGCTGGAATCTATTTTTGTAGTTGTACTTAGAAACCTCCAATGACAAAGAAAGTTTGCCACCCCCTGACCTGGAGATCTTGTCTTTAGACACTGTGCAGAG	1	+	chr18:61085820-61085939
CAMK2A	BA_593036_013738	TGACAAAGAAAGTTTGCCACCCCCTGACCTGGAGATCTTGTCTTTAGACACTGTGCAGAGTGGCTAGCTTTCTCCTAGCACATCCCCTCCGGCTTCCCCAGATACCTTCCGGGAGCAACA	1	+	chr18:61085880-61085999
CAMK2A	BA_593036_013739	TGGCTAGCTTTCTCCTAGCACATCCCCTCCGGCTTCCCCAGATACCTTCCGGGAGCAACAGCTTCAGTACAGAAGGAGTTAATATAAAGCAATCACAGTGTTGGGAGGAGGGGAAGGACA	1	+	chr18:61085940-61086059
CAMK2A	BA_593036_013740	GCTTCAGTACAGAAGGAGTTAATATAAAGCAATCACAGTGTTGGGAGGAGGGGAAGGACAGTCAGCCAGCCGGGGGGTGCCACTGTGGCACTGACTATACAAAACAACTGTGGTCCTTTG	1	+	chr18:61086000-61086119
CAMK2A	BA_593036_013741	GTCAGCCAGCCGGGGGGTGCCACTGTGGCACTGACTATACAAAACAACTGTGGTCCTTTGGCAAAGTTGCCCATCGTGTTATATCTCAGGAGGCTGAGAGGAGAAAGGTTCCCTCCAGAA	1	+	chr18:61086060-61086179
CAMK2A	BA_593036_013742	GCAAAGTTGCCCATCGTGTTATATCTCAGGAGGCTGAGAGGAGAAAGGTTCCCTCCAGAAGAGCAGCAGGCTACAGATATAAGAGAAGGTTTCTAGATGTTCCCAGCTAGGTTATGGGGT	1	+	chr18:61086120-61086239
CAMK2A	BA_593036_013743	GAGCAGCAGGCTACAGATATAAGAGAAGGTTTCTAGATGTTCCCAGCTAGGTTATGGGGTCCTGGGTTGGATCAGGAGTTGGGGGAGCAGTTTGGCAGAGTGCCCCACGGATGCATACGT	1	+	chr18:61086180-61086299
CAMK2A	BA_593036_013744	CCTGGGTTGGATCAGGAGTTGGGGGAGCAGTTTGGCAGAGTGCCCCACGGATGCATACGTGCTCCTACCAGTCCTGTTTGGTTCCTGCTGTAGCGCAGTAACATGAGACAAGGGGCCCTG	1	+	chr18:61086240-61086359
CAMK2A	BA_593036_013745	GCTCCTACCAGTCCTGTTTGGTTCCTGCTGTAGCGCAGTAACATGAGACAAGGGGCCCTGTGAGCAGATGTGTCAGTGTGAGCTCCTGCAGGTACACAGATATTGAGGAGAGACTATATA	1	+	chr18:61086300-61086419
CAMK2A	BA_593036_013746	TGAGCAGATGTGTCAGTGTGAGCTCCTGCAGGTACACAGATATTGAGGAGAGACTATATATGAAATCTGTGTGTGTGGGGGGGAACAAATGGAGTTGTGTAAGAACTGACACTGGGCACA	1	+	chr18:61086360-61086479
CAMK2A	BA_593036_013747	TGAAATCTGTGTGTGTGGGGGGGAACAAATGGAGTTGTGTAAGAACTGACACTGGGCACACTGCAAACTGAAAGGGCAAACACTGGTGCAAGTAAAACAAGAAGAGATGTGTGTGTCATT	1	+	chr18:61086420-61086539
CAMK2A	BA_593036_013748	CTGCAAACTGAAAGGGCAAACACTGGTGCAAGTAAAACAAGAAGAGATGTGTGTGTCATTTGCATGGCAAGCCCGCCCCCCTCCAAAAAATGTTCATGCGCCCTGCAAGGGTGCATGTGT	1	+	chr18:61086480-61086599
CAMK2A	BA_593036_013749	TGCATGGCAAGCCCGCCCCCCTCCAAAAAATGTTCATGCGCCCTGCAAGGGTGCATGTGTGCAATTATGCAAGGGTTGTTCTTGGCTAGGTGATGTTGCAGCAAGGGTATGGACATGCAT	1	+	chr18:61086540-61086659
CAMK2A	BA_593036_013750	GCAATTATGCAAGGGTTGTTCTTGGCTAGGTGATGTTGCAGCAAGGGTATGGACATGCATCTGTGTGCACATGTGTGGCAGGTCAGAGATGGATACTCTCAGTGAATGTGTGTGTGTGTG	1	+	chr18:61086600-61086719
CBFB	BA_593036_002070	CTTTAAATGATGTGCTAGATCTACATAAACACTCTCCTACTAACGCCATGAACTTATGAGTGTGCATTTTAGAAATTACTAATCTGAGACTTACTGGTCTGGTACTTGTCTAAACCTTGT	1	+	chr8:107693914-107694033
CBFB	BA_593036_002071	TGTGCATTTTAGAAATTACTAATCTGAGACTTACTGGTCTGGTACTTGTCTAAACCTTGTCTGCAGGCAGAGCTACACGGAATCCTAAGGCCAACCCCGTTTCAATAGCCACCACCTTTT	1	+	chr8:107693974-107694093
CBFB	BA_593036_002072	CTGCAGGCAGAGCTACACGGAATCCTAAGGCCAACCCCGTTTCAATAGCCACCACCTTTTTACACCATGATTTGGTTAGATGCTTACTTCCACCTTTCAGTGCACAGTCCACATCCCTCC	1	+	chr8:107694034-107694153
CBFB	BA_593036_002073	TACACCATGATTTGGTTAGATGCTTACTTCCACCTTTCAGTGCACAGTCCACATCCCTCCCTGTATGCAAAGTCCTCTAAGATTTAGGTTTCCTTGAATTCAAGTGGCCCTTCTGGGGGT	1	+	chr8:107694094-107694213
CBFB	BA_593036_002074	CTGTATGCAAAGTCCTCTAAGATTTAGGTTTCCTTGAATTCAAGTGGCCCTTCTGGGGGTGACTCTGCGTGGCTGGCTGGGGAGCCAAGAAGTTCCAGATCGCTCACAAAGGGCCAAAAA	1	+	chr8:107694154-107694273
CBFB	BA_593036_002075	GACTCTGCGTGGCTGGCTGGGGAGCCAAGAAGTTCCAGATCGCTCACAAAGGGCCAAAAAAAAAAAAAAAAAGGTCTGCGGGTCCGCTTCTAGTTGCTAAGAGAGGGGCGGATCCCTTCT	1	+	chr8:107694214-107694333
CBFB	BA_593036_002076	AAAAAAAAAAAAGGTCTGCGGGTCCGCTTCTAGTTGCTAAGAGAGGGGCGGATCCCTTCTGGGCGGGTTGTTCGCAGAGAAGCCCGCGGACAGGCAAGGGGAAGTGCTGAGGAAGGAGCA	1	+	chr8:107694274-107694393
CBFB	BA_593036_002077	GGGCGGGTTGTTCGCAGAGAAGCCCGCGGACAGGCAAGGGGAAGTGCTGAGGAAGGAGCAGGGTTTCACTGCAACCCAGCGGCCCCGCAAGCGGGTGGGTGGCGCATGCGCGGCGCGGGT	2	+	chr8:107694334-107694453
CBFB	BA_593036_002078	GGGTTTCACTGCAACCCAGCGGCCCCGCAAGCGGGTGGGTGGCGCATGCGCGGCGCGGGTCGTGGAGTTGTGAATGGTGCGTCTTGTTTGCTAGAGTTTGAGGCGGGCGGGCGCGCGAGG	2	+	chr8:107694394-107694513
CBFB	BA_593036_002079	CGGGCGGCGGTAGCGTGGGTTGGGCTCCAAGCACACGGCCGCACCTCAGCCTCCCTGGAGCGGGAGGCCACGCGGGCGGGCTCCTGAAACAAAGAGAAGCGGGAGTCCGGGTGCCGCGGG	2	+	chr8:107694662-107694781
CBFB	BA_593036_002080	CGGGAGGCCACGCGGGCGGGCTCCTGAAACAAAGAGAAGCGGGAGTCCGGGTGCCGCGGGTGGGCGGTCAAGGCGGTCAGCACCGGAGCCCGCCAGCGGGTGCCCGCGCGAGCCTGGGGA	2	+	chr8:107694722-107694841
CBFB	BA_593036_002081	TGGGCGGTCAAGGCGGTCAGCACCGGAGCCCGCCAGCGGGTGCCCGCGCGAGCCTGGGGAGCGCGGCCGGCCGGCGCGGCCTGAGGGCGGGAAGATGCCGCGCGTCGTCCCGGACCAGAG	2	+	chr8:107694782-107694901
CBFB	BA_593036_002082	GCGCGGCCGGCCGGCGCGGCCTGAGGGCGGGAAGATGCCGCGCGTCGTCCCGGACCAGAGGAGCAAGTTCGAGAACGAGGAGTTCTTCAGGAAGCTGAGCCGCGAGTGCGAGGTGAGGCG	2	+	chr8:107694842-107694961
CBFB	BA_593036_002083	GAGCAAGTTCGAGAACGAGGAGTTCTTCAGGAAGCTGAGCCGCGAGTGCGAGGTGAGGCGGTTGGGGAGGCGCGGAGGCCTCGGCGCGCCCCGAGTGGGCCCGGGGAGGAGAAAAGTTTG	2	+	chr8:107694902-107695021
CBFB	BA_593036_002084	GTTGGGGAGGCGCGGAGGCCTCGGCGCGCCCCGAGTGGGCCCGGGGAGGAGAAAAGTTTGAGCGGCTCGGTTGCCGGGAAGCCCCCGGGACGGCGCGCCGGCCGAGGGGGAATCTCGCCC	2	+	chr8:107694962-107695081
CBFB	BA_593036_002085	AGCGGCTCGGTTGCCGGGAAGCCCCCGGGACGGCGCGCCGGCCGAGGGGGAATCTCGCCCCGGCAAGCAGTCCGCCCACAGGCTCTGCTTGCCCTTATCGGAGCCGCGGGGAGCGGGCGG	2	+	chr8:107695022-107695141
CBFB	BA_593036_002086	CGGCAAGCAGTCCGCCCACAGGCTCTGCTTGCCCTTATCGGAGCCGCGGGGAGCGGGCGGGCGGGCCGGCGGGTGCCGCCGCGGATTTGACTCCTGATTTCGGGGCCGTCTCTCTGCCTT	2	+	chr8:107695082-107695201
CBFB	BA_593036_002087	GCGGGCCGGCGGGTGCCGCCGCGGATTTGACTCCTGATTTCGGGGCCGTCTCTCTGCCTTGCAGATTAAGTACACGGGCTTCAGGGACCGGCCCCACGAGGAGCGCCAGACACGCTTCCA	2	+	chr8:107695142-107695261
CBFB	BA_593036_002088	GCAGATTAAGTACACGGGCTTCAGGGACCGGCCCCACGAGGAGCGCCAGACACGCTTCCAGAACGCCTGCCGCGACGGTCGCTCGGAGATCGTAAGTCGCCGGGGAGGGACCCCCCCACC	2	+	chr8:107695202-107695321
CBFB	BA_593036_002089	GAACGCCTGCCGCGACGGTCGCTCGGAGATCGTAAGTCGCCGGGGAGGGACCCCCCCACCCTACCCCCGGTGCGCGCGGGGAGGCCGCGGGGACCCAGGCGCGCGCCAGTCACTTGTTGC	2	+	chr8:107695262-107695381
CBFB	BA_593036_002090	CTACCCCCGGTGCGCGCGGGGAGGCCGCGGGGACCCAGGCGCGCGCCAGTCACTTGTTGCGCGCGGCCCCGGGCGTGTTCCGGACGGCGCCGCGGACGCTGCGGCTCCCGGAACTGAGCC	2	+	chr8:107695322-107695441
CBFB	BA_593036_002091	GCGCGGCCCCGGGCGTGTTCCGGACGGCGCCGCGGACGCTGCGGCTCCCGGAACTGAGCCGGGGGCGCAGGCTCACTTCCTTAGTCCGGATTCGAAAAGCAAGAAAGAGGCAGATGCTGG	2	+	chr8:107695382-107695501
CBFB	BA_593036_002092	GGGGGCGCAGGCTCACTTCCTTAGTCCGGATTCGAAAAGCAAGAAAGAGGCAGATGCTGGCGGGGCGGCTCGGCTCGGCCCTCGGGCGGACCCGCCTTCTCCTTGGCCCGCCGCGATGGT	2	+	chr8:107695442-107695561
CBFB	BA_593036_002093	CGGGGCGGCTCGGCTCGGCCCTCGGGCGGACCCGCCTTCTCCTTGGCCCGCCGCGATGGTTCGGTTCGTGGGATGGTTTGCGTGTCCTAGTGCCGGCTCGGCAATCCGAGCGGAGCTCCA	2	+	chr8:107695502-107695621
CBFB	BA_593036_002094	TCGGTTCGTGGGATGGTTTGCGTGTCCTAGTGCCGGCTCGGCAATCCGAGCGGAGCTCCAACCGGAGCTTGGCGGAGGTTGTCGCCTAGGCTGTGACCTCCGCCAGACATCGGGGTGCTT	1	+	chr8:107695562-107695681
CBFB	BA_593036_002095	ACCGGAGCTTGGCGGAGGTTGTCGCCTAGGCTGTGACCTCCGCCAGACATCGGGGTGCTTGTAGGAAGGATACAGCCCTACGTGTAAAGAATCATTGGAGGGGGATCAGCGATAGGCTTG	1	+	chr8:107695622-107695741
CBFB	BA_593036_002096	GTAGGAAGGATACAGCCCTACGTGTAAAGAATCATTGGAGGGGGATCAGCGATAGGCTTGTTTCTGAGAAGCGAGATTGGTAAATCTATATGAGAAGCTATCTCCCAGTACAGCCGAGAG	1	+	chr8:107695682-107695801
CBFB	BA_593036_002097	TTTCTGAGAAGCGAGATTGGTAAATCTATATGAGAAGCTATCTCCCAGTACAGCCGAGAGTAAATCTATTCCACTTATCTGTTGTCCTAATAGAAGAGAGAGACTGTCCTAATAGAAGAG	1	+	chr8:107695742-107695861
CBFB	BA_593036_002098	TAAATCTATTCCACTTATCTGTTGTCCTAATAGAAGAGAGAGACTGTCCTAATAGAAGAGAGAGACGAGAGAAAGGGCCCCAGTGGATGAACAATTTTCTTTTCTTAAAATGTTAAGAAT	1	+	chr8:107695802-107695921
CBFB	BA_593036_002099	AGAGACGAGAGAAAGGGCCCCAGTGGATGAACAATTTTCTTTTCTTAAAATGTTAAGAATCCGAAAGAAATCTATATTTTCCTTTTTCTAACCTCGATGTGCCTGTCTGAGTATTGGAGT	1	+	chr8:107695862-107695981
CBFB	BA_593036_002100	CCGAAAGAAATCTATATTTTCCTTTTTCTAACCTCGATGTGCCTGTCTGAGTATTGGAGTTGCTAAAGAATTGCCTGGTGCTACACAGACAAATCCCATAGTTCATCTAGAGGTTCCTGT	1	+	chr8:107695922-107696041
CBFB	BA_593036_002101	TGCTAAAGAATTGCCTGGTGCTACACAGACAAATCCCATAGTTCATCTAGAGGTTCCTGTTTTATATTTGAAGACTGCTATGGACTCGGCAAGTCCTGGGTTGAAAAATATCGAAGTGAT	1	+	chr8:107695982-107696101
CBFB	BA_593036_002102	TTTATATTTGAAGACTGCTATGGACTCGGCAAGTCCTGGGTTGAAAAATATCGAAGTGATCTAGTTCCTCTCTTGCCTCTTCGTTATCCTCCTTAGAGGTGTTGGTTAGGAAGCAACGAA	1	+	chr8:107696042-107696161
CBFB	BA_593036_002103	CTAGTTCCTCTCTTGCCTCTTCGTTATCCTCCTTAGAGGTGTTGGTTAGGAAGCAACGAAAAGAAGAACTGTAGGAAAGAGATTTTTTTTGGTTGGGTGGTTTTTGTTTTGTTTTGTTTT	1	+	chr8:107696102-107696221
CBFB	BA_593036_002104	AAGAAGAACTGTAGGAAAGAGATTTTTTTTGGTTGGGTGGTTTTTGTTTTGTTTTGTTTTAAACTGAAGCACTGTGTAATGAAATCCTAATATTTGCTCAAGTGACAGACCCATTGCCTT	1	+	chr8:107696162-107696281
CBFB	BA_593036_002105	AAACTGAAGCACTGTGTAATGAAATCCTAATATTTGCTCAAGTGACAGACCCATTGCCTTAGCCCAAACTTTAAGTAAAGGTACAATTTGAATACAGGTTAACAGTATAAGGCTGTTGGT	1	+	chr8:107696222-107696341
CBFB	BA_593036_002106	AGCCCAAACTTTAAGTAAAGGTACAATTTGAATACAGGTTAACAGTATAAGGCTGTTGGTGAATGTCGCTTTTTTTTTTAATTGAGATGTAGTTCGTATAACAATGAACAACTTGTGCTC	1	+	chr8:107696282-107696401
CCND1	BA_678916_002767	GAAGCTGTGTCATTCTGTTAGGTCTCCAAGATACTAGCCAAGAGAATGTGCCACCCAGTATCATCTATCTCTCCAACAAACTATCTGCACCCTGGGCTCAGAATAGATAGCAAGGAAAGA	1	+	chr7:152123012-152123131
CCND1	BA_678916_002768	ATACTAGCCAAGAGAATGTGCCACCCAGTATCATCTATCTCTCCAACAAACTATCTGCACCCTGGGCTCAGAATAGATAGCAAGGAAAGAGGCCTTAACCCCAGGGGGAGTGGCAAGGAG	1	+	chr7:152123042-152123161
CCND1	BA_678916_002769	TCATCTATCTCTCCAACAAACTATCTGCACCCTGGGCTCAGAATAGATAGCAAGGAAAGAGGCCTTAACCCCAGGGGGAGTGGCAAGGAGCCCGCTCTTCCTGGGAAGAATGGGGGTGGA	1	+	chr7:152123072-152123191
CCND1	BA_678916_002770	CCTGGGCTCAGAATAGATAGCAAGGAAAGAGGCCTTAACCCCAGGGGGAGTGGCAAGGAGCCCGCTCTTCCTGGGAAGAATGGGGGTGGAGCCTTACCTGTGGCACAGAGGGCCACAAAG	1	+	chr7:152123102-152123221
CCND1	BA_678916_002771	GGCCTTAACCCCAGGGGGAGTGGCAAGGAGCCCGCTCTTCCTGGGAAGAATGGGGGTGGAGCCTTACCTGTGGCACAGAGGGCCACAAAGGTCTGTGCATGCTTGCGGATGGTCTGCTTG	1	+	chr7:152123132-152123251
CCND1	BA_678916_002772	CCCGCTCTTCCTGGGAAGAATGGGGGTGGAGCCTTACCTGTGGCACAGAGGGCCACAAAGGTCTGTGCATGCTTGCGGATGGTCTGCTTGTTCTCATCCGCCTCTGGCATTTTGGAGAGG	1	+	chr7:152123162-152123281
CCND1	BA_678916_002773	GCCTTACCTGTGGCACAGAGGGCCACAAAGGTCTGTGCATGCTTGCGGATGGTCTGCTTGTTCTCATCCGCCTCTGGCATTTTGGAGAGGAAGTGTTCGATGAAATCGTGGGGAGTCATG	1	+	chr7:152123192-152123311
CCND1	BA_678916_002774	GTCTGTGCATGCTTGCGGATGGTCTGCTTGTTCTCATCCGCCTCTGGCATTTTGGAGAGGAAGTGTTCGATGAAATCGTGGGGAGTCATGGCGGCCAGGTTCCACTTGAGCTTGTTCACC	1	+	chr7:152123222-152123341
CCND1	BA_678916_002775	TTCTCATCCGCCTCTGGCATTTTGGAGAGGAAGTGTTCGATGAAATCGTGGGGAGTCATGGCGGCCAGGTTCCACTTGAGCTTGTTCACCAGAAGCAGTTCCATTTGCTGCAGAGAATGA	1	+	chr7:152123252-152123371
CCND1	BA_678916_002776	AAGTGTTCGATGAAATCGTGGGGAGTCATGGCGGCCAGGTTCCACTTGAGCTTGTTCACCAGAAGCAGTTCCATTTGCTGCAGAGAATGAGGAACACGGTCAAAAGGAAGGCAGGCTGAT	1	+	chr7:152123282-152123401
CCND1	BA_678916_002777	GCGGCCAGGTTCCACTTGAGCTTGTTCACCAGAAGCAGTTCCATTTGCTGCAGAGAATGAGGAACACGGTCAAAAGGAAGGCAGGCTGATTCGAGAAGGTCTAAAGAGTTGGGTCAACCC	1	+	chr7:152123312-152123431
CCND1	BA_678916_002778	AGAAGCAGTTCCATTTGCTGCAGAGAATGAGGAACACGGTCAAAAGGAAGGCAGGCTGATTCGAGAAGGTCTAAAGAGTTGGGTCAACCCGGGACCCCATACAGGTAAACAACAAAATGT	1	+	chr7:152123342-152123461
CCND1	BA_678916_002779	GGAACACGGTCAAAAGGAAGGCAGGCTGATTCGAGAAGGTCTAAAGAGTTGGGTCAACCCGGGACCCCATACAGGTAAACAACAAAATGTGCCTGTAGAAATACTAAGGGGACAGACTGC	1	+	chr7:152123372-152123491
CCND1	BA_678916_002780	TCGAGAAGGTCTAAAGAGTTGGGTCAACCCGGGACCCCATACAGGTAAACAACAAAATGTGCCTGTAGAAATACTAAGGGGACAGACTGCGGACAAAAAGAATCTCCCACCGCCAGCGCC	1	+	chr7:152123402-152123521
CCND1	BA_678916_002781	GGGACCCCATACAGGTAAACAACAAAATGTGCCTGTAGAAATACTAAGGGGACAGACTGCGGACAAAAAGAATCTCCCACCGCCAGCGCCGTGGCCTGCACGTCGCTAGGGGGCGCACAC	1	+	chr7:152123432-152123551
CCND1	BA_678916_002782	GCCTGTAGAAATACTAAGGGGACAGACTGCGGACAAAAAGAATCTCCCACCGCCAGCGCCGTGGCCTGCACGTCGCTAGGGGGCGCACACCGCCCACATTTCAGAGTGGTTTCACCACAG	1	+	chr7:152123462-152123581
CCND1	BA_678916_002783	GGACAAAAAGAATCTCCCACCGCCAGCGCCGTGGCCTGCACGTCGCTAGGGGGCGCACACCGCCCACATTTCAGAGTGGTTTCACCACAGACATGGTGGGGAGTCCAGTACGGAAAGAGG	1	+	chr7:152123492-152123611
CCND1	BA_678916_002784	GTGGCCTGCACGTCGCTAGGGGGCGCACACCGCCCACATTTCAGAGTGGTTTCACCACAGACATGGTGGGGAGTCCAGTACGGAAAGAGGGCGGGCACAGAGGTAGAATGGGTTGGCATT	1	+	chr7:152123522-152123641
CCND1	BA_678916_002785	CGCCCACATTTCAGAGTGGTTTCACCACAGACATGGTGGGGAGTCCAGTACGGAAAGAGGGCGGGCACAGAGGTAGAATGGGTTGGCATTCTGCTCACTGCCATTTCGGTGTCGTGCGGT	1	+	chr7:152123552-152123671
CCND1	BA_678916_002786	ACATGGTGGGGAGTCCAGTACGGAAAGAGGGCGGGCACAGAGGTAGAATGGGTTGGCATTCTGCTCACTGCCATTTCGGTGTCGTGCGGTGCGGTGCGGGTGCCTTTCGTGGGGCAGGAG	1	+	chr7:152123582-152123701
CCND1	BA_678916_002787	GCGGGCACAGAGGTAGAATGGGTTGGCATTCTGCTCACTGCCATTTCGGTGTCGTGCGGTGCGGTGCGGGTGCCTTTCGTGGGGCAGGAGATCTGTCCATGGATGGCTGGATCTCCTGCC	1	+	chr7:152123612-152123731
CCND1	BA_678916_002788	CTGCTCACTGCCATTTCGGTGTCGTGCGGTGCGGTGCGGGTGCCTTTCGTGGGGCAGGAGATCTGTCCATGGATGGCTGGATCTCCTGCCATTTGCAGCTCCCACCACCCAGCATAAAGA	1	+	chr7:152123642-152123761
CCND1	BA_678916_002789	GCGGTGCGGGTGCCTTTCGTGGGGCAGGAGATCTGTCCATGGATGGCTGGATCTCCTGCCATTTGCAGCTCCCACCACCCAGCATAAAGAGGGATTGTCGGTGGTGGGTTACGTGGTTAC	1	+	chr7:152123672-152123791
CCND1	BA_678916_002790	ATCTGTCCATGGATGGCTGGATCTCCTGCCATTTGCAGCTCCCACCACCCAGCATAAAGAGGGATTGTCGGTGGTGGGTTACGTGGTTACCAGCAGCTCCTCGGGCCGGATAGAGTTGTC	1	+	chr7:152123702-152123821
CCND1	BA_678916_002791	ATTTGCAGCTCCCACCACCCAGCATAAAGAGGGATTGTCGGTGGTGGGTTACGTGGTTACCAGCAGCTCCTCGGGCCGGATAGAGTTGTCAGTGTAGATGCACAACTTCTCGGCAGTCAA	1	+	chr7:152123732-152123851
CCND1	BA_678916_002792	GGGATTGTCGGTGGTGGGTTACGTGGTTACCAGCAGCTCCTCGGGCCGGATAGAGTTGTCAGTGTAGATGCACAACTTCTCGGCAGTCAAGGGAATGGTCTCCTTCATCTTAGAGGCCAC	1	+	chr7:152123762-152123881
CCND1	BA_678916_002793	CAGCAGCTCCTCGGGCCGGATAGAGTTGTCAGTGTAGATGCACAACTTCTCGGCAGTCAAGGGAATGGTCTCCTTCATCTTAGAGGCCACGAACATGCAGGTGGCCCCCAGCAGCTGCAG	1	+	chr7:152123792-152123911
CCND1	BA_678916_002794	AGTGTAGATGCACAACTTCTCGGCAGTCAAGGGAATGGTCTCCTTCATCTTAGAGGCCACGAACATGCAGGTGGCCCCCAGCAGCTGCAGGCGGCTCTTCTTCAAGGGCTCCAGGGACAG	1	+	chr7:152123822-152123941
CCND1	BA_678916_002795	GGGAATGGTCTCCTTCATCTTAGAGGCCACGAACATGCAGGTGGCCCCCAGCAGCTGCAGGCGGCTCTTCTTCAAGGGCTCCAGGGACAGGAAGCGGTCCAGGTAGTTCATGGCCAGCGG	1	+	chr7:152123852-152123971
CCND1	BA_678916_002796	GAACATGCAGGTGGCCCCCAGCAGCTGCAGGCGGCTCTTCTTCAAGGGCTCCAGGGACAGGAAGCGGTCCAGGTAGTTCATGGCCAGCGGGAAGACCTCCTCTTCGCACTTCTGCTCCTC	1	+	chr7:152123882-152124001
CCND1	BA_678916_002797	GCGGCTCTTCTTCAAGGGCTCCAGGGACAGGAAGCGGTCCAGGTAGTTCATGGCCAGCGGGAAGACCTCCTCTTCGCACTTCTGCTCCTCACAGACCTGCGGGGATCCGGACCCTGACCG	1	+	chr7:152123912-152124031
CCND1	BA_678916_002798	GAAGCGGTCCAGGTAGTTCATGGCCAGCGGGAAGACCTCCTCTTCGCACTTCTGCTCCTCACAGACCTGCGGGGATCCGGACCCTGACCGTCAACGTGGGAGGGGGGCGTCGCTCGATAC	1	+	chr7:152123942-152124061
[truncated: 21,952 more rows]
