# Supplementary material for: Characterization of hundreds of regulatory landscapes in developing limbs reveals two regimes of chromatin folding
Source: HighWire-hosted journal article supplement (doi:10.1101/gr.213066.116), 2016-12-06
Supplement: Supplemental_Table_S7.xlsx [file Supplemental_Table_S7.xlsx]

## Sheet: Sheet1
Sample	Total_read_pairs	Mapped_uniquely_reads_pairs	Same_circularized	Same_dangling_ends	Same_internal	Re_ligation	Valid_pairs	Unique_valid_pairs	Cis_lt_10kbp_of_uniques	Cis_gt_10kbp_of_uniques	Trans_of_uniques
FL_E10.5_Rep1	67210067	47077411	5350545	1414776	29603093	4466817	6242180	4063342	689303	1945044	1428995
FL_E10.5_Rep2	93778829	64629898	823304	2493531	45028806	6466756	9817501	5143289	740186	2155719	2247384
HL_E10.5_Rep1	443327114	283542509	37415247	8289962	174165476	25917380	37754444	11390740	2057267	5631687	3701786
HL_E10.5_Rep2	85798230	52782273	180068	2205288	36670519	5549583	8176815	5257809	865109	2407351	1985349
FL_E11.5_Rep1	72761335	46889691	580879	1574100	33639745	5212488	5882479	4150167	765744	1716445	1667978
FL_E11.5_Rep2	101367336	67990951	443431	2317460	49861175	7779073	7589812	4790168	964577	2229236	1596355
HL_E11.5_Rep1	84684591	55956486	383892	1929200	38518323	6075054	9050017	4798387	776079	1978471	2043837
HL_E11.5_Rep2	98382340	65635294	406680	2166245	47960063	6918651	8183655	4972093	905737	2391357	1674999
FL_E13.5_Rep1	103695928	67168440	577705	2374313	44754609	7282659	12179154	8794066	1196713	3689034	3908319
FL_E13.5_Rep2	92589234	54238303	487641	2925890	41586080	3725535	5513157	3637274	443824	1621998	1571452
HL_E13.5_Rep1	81034225	50465450	329676	1858204	34013160	4997133	9267277	7362602	918476	3111021	3333105
HL_E13.5_Rep2	110789249	56781795	596260	3302218	43579716	4132546	5171055	3145104	403158	1347544	1394402
MB_E10.5_Rep1	89501617	54603609	353984	2122973	36622115	6031653	9472884	6866163	983206	2740089	3142868
MB_E10.5_Rep2	109538643	76426510	849467	2883837	56513777	7227664	8951765	6194195	963968	2893135	2337092
